# Supplementary material
Source: MDPI journal article supplement (https://www.mdpi.com/2304-6740/3/2/118)
Supplement: s2 [file s2]

_publ_contact_author

	'Prof. Dr. A. Klein'
	'Institute of Inorganic Chemistry'
	'University of Cologne'
	'Greinstrasse 6'
	'D-50939 Cologne'
	'Germany'
2.
_publ_contact_author_phone	'049 221 470-4006'
_publ_contact_author_fax 	'049 221 470-4899'
_publ_contact_author_email	'axel.klein@uni-koeln.de'
3.
._publ_requested_coeditor_name	'Michael Neugebauer, Alexander Krest, Anna L�ning, Simon Garbe, Natalia Arefyeva, Nils Schl�rer'
4.
_publ_requested_journal		'Inorganics'


publ_section_title   'Five coordinate Platinum(II) in [Pt(bpy)(cod)(Me)][SbF6] - A Structural and Spectroscopic Study'


loop_
_publ_author_name
_publ_author_adress

	
        'Klein, Axel'
	'Institute of Inorganic Chemistry'
	'University of Cologne'
	'Greinstrasse 6'
	'D-50939 Cologne'
	'Germany'
	'email: axel.klein@uni-koeln.de'
	
	'Neugebauer, Michael'
    	'Institute of Inorganic Chemistry'
	'University of Cologne'
	'Greinstrasse 6'
	'D-50939 Cologne'
	'Germany'

	'Krest, Alexander'
    	'Institute of Inorganic Chemistry'
	'University of Cologne'
	'Greinstrasse 6'
	'D-50939 Cologne'
	'Germany'	

	'L�ning, Anna'
    	'Institute of Inorganic Chemistry'
	'University of Cologne'
	'Greinstrasse 6'
	'D-50939 Cologne'
	'Germany'
	
	'Garbe, Simon'
    	'Institute of Inorganic Chemistry'
	'University of Cologne'
	'Greinstrasse 6'
	'D-50939 Cologne'
	'Germany'

	'Arefyeva, Natalia'
    	'Institute of Inorganic Chemistry'
	'University of Cologne'
	'Greinstrasse 6'
	'D-50939 Cologne'
	'Germany'

	'Schl�rer, Nils'
    	'Institute of Organic Chemistry - NMR platform'
	'University of Cologne'
	'Greinstrasse 4'
	'D-50939 Cologne'
	'Germany'
	
        
   

loop_
 
data_shelxdata_shelxl

_audit_creation_method            SHELXL-2013
_chemical_name_systematic         'Methyl-2,2'-bipyridine-1,5-cyclooctadieneplatinum(II) hexafluoroantimonate'
_chemical_name_common             '[Pt(bpy)(cod)(Me)][SbF6]'
_chemical_melting_point           ?
_chemical_formula_moiety          'C19 H23 F6 N2 Pt Sb' 
_chemical_formula_sum		  'C19 H23 F6 N2 Pt Sb' 
_chemical_formula_weight          710.23


loop_
 _atom_type_symbol
 _atom_type_description
 _atom_type_scat_dispersion_real
 _atom_type_scat_dispersion_imag
 _atom_type_scat_source
 'C'  'C'   0.0033   0.0016
 'International Tables Vol C Tables 4.2.6.8 and 6.1.1.4'
 'H'  'H'   0.0000   0.0000
 'International Tables Vol C Tables 4.2.6.8 and 6.1.1.4'
 'F'  'F'   0.0171   0.0103
 'International Tables Vol C Tables 4.2.6.8 and 6.1.1.4'
 'N'  'N'   0.0061   0.0033
 'International Tables Vol C Tables 4.2.6.8 and 6.1.1.4'
 'Pt'  'Pt'  -1.7033   8.3905
 'International Tables Vol C Tables 4.2.6.8 and 6.1.1.4'
 'Sb'  'Sb'  -0.5866   1.5461
 'International Tables Vol C Tables 4.2.6.8 and 6.1.1.4'
 
_space_group_crystal_system       monoclinic
_space_group_IT_number            14
_space_group_name_H-M_alt         'P 21/c'
_space_group_name_Hall            '-P 2ybc'
 
_shelx_space_group_comment
;
The symmetry employed for this shelxl refinement is uniquely defined
by the following loop, which should always be used as a source of
symmetry information in preference to the above space-group names.
They are only intended as comments.
;
 
loop_
 _space_group_symop_operation_xyz
 'x, y, z'
 '-x, y+1/2, -z+1/2'
 '-x, -y, -z'
 'x, -y-1/2, z-1/2'
 
_cell_length_a                    11.8078(9)
_cell_length_b                    8.3564(7)
_cell_length_c                    21.0767(18)
_cell_angle_alpha                 90
_cell_angle_beta                  99.052(6)
_cell_angle_gamma                 90
_cell_volume                      2053.8(3)
_cell_formula_units_Z             4
_cell_measurement_temperature     170(2)
_cell_measurement_reflns_used     0 
_cell_measurement_theta_min       0 
_cell_measurement_theta_max       0
 
_exptl_crystal_description        prism 
_exptl_crystal_colour             yellow 
_exptl_crystal_density_meas       ? 
_exptl_crystal_density_method     'not measured'               
_exptl_crystal_density_diffrn     2.297          
_exptl_crystal_F_000              1336
_exptl_transmission_factor_min    ?                                             
_exptl_transmission_factor_max    ?                                             
_exptl_crystal_size_max           0.5 
_exptl_crystal_size_mid           0.5 
_exptl_crystal_size_min           0.5 
_exptl_absorpt_coefficient_mu     8.180
_shelx_estimated_absorpt_T_min    ? 
_shelx_estimated_absorpt_T_max    ? 
_exptl_absorpt_correction_type    'numerical'
_exptl_absorpt_correction_T_min   0.0681
_exptl_absorpt_correction_T_max   0.3369
_exptl_absorpt_process_details    ? 
 
_exptl_special_details
;
 ?
;
 
_diffrn_ambient_temperature       170(2)
_diffrn_radiation_wavelength      0.71073
_diffrn_radiation_type            MoK\a
_diffrn_radiation_source          'fine-focus sealed tube'
_diffrn_radiation_monochromator   graphite
_diffrn_measurement_device_type   'STOE IPDS II'
_diffrn_measurement_method        'w scans'
_diffrn_detector_area_resol_mean  ? 
_diffrn_reflns_number             24266
_diffrn_reflns_av_unetI/netI      0.0632
_diffrn_reflns_av_R_equivalents   0.1258
_diffrn_reflns_limit_h_min        -15
_diffrn_reflns_limit_h_max        13
_diffrn_reflns_limit_k_min        -10
_diffrn_reflns_limit_k_max        10
_diffrn_reflns_limit_l_min        -26
_diffrn_reflns_limit_l_max        26
_diffrn_reflns_theta_min          1.746
_diffrn_reflns_theta_max          27.418
_diffrn_reflns_theta_full         25.000
_diffrn_measured_fraction_theta_max   0.963
_diffrn_measured_fraction_theta_full  0.998
_diffrn_reflns_Laue_measured_fraction_max    0.963
_diffrn_reflns_Laue_measured_fraction_full   0.998
_diffrn_reflns_point_group_measured_fraction_max   0.963
_diffrn_reflns_point_group_measured_fraction_full  0.998
_reflns_number_total              4504
_reflns_number_gt                 4154
_reflns_threshold_expression      'I > 2\s(I)'
_reflns_Friedel_coverage          0.000
_reflns_Friedel_fraction_max      .
_reflns_Friedel_fraction_full     .
 
_reflns_special_details
;
 Reflections were merged by SHELXL according to the crystal
 class for the calculation of statistics and refinement.
 
 _reflns_Friedel_fraction is defined as the number of unique
 Friedel pairs measured divided by the number that would be
 possible theoretically, ignoring centric projections and
 systematic absences.
;
 
_computing_data_collection        'X-AREA (STOE & Cie 2001)' 
_computing_cell_refinement        'X-AREA (STOE & Cie 2001)' 
_computing_data_reduction         'X-RED (STOE & Cie 2001)' 
_computing_structure_solution     'SIR92 (Giacovazzo et al, 1993)'
_computing_structure_refinement   'SHELXL-2013 (Sheldrick, 2013)'
_computing_molecular_graphics     'DIAMOND (Brandenburg, 2006)'
_computing_publication_material   'WinGX publication routines (Farrugia, 2012)'
 
_refine_special_details
;
 ?
;
_refine_ls_structure_factor_coef  Fsqd
_refine_ls_matrix_type            full
_refine_ls_weighting_scheme       calc
_refine_ls_weighting_details
'w=1/[\s^2^(Fo^2^)+(0.0411P)^2^+62.9744P] where P=(Fo^2^+2Fc^2^)/3'
_atom_sites_solution_primary      ?
_atom_sites_solution_secondary    ?
_atom_sites_solution_hydrogens    geom
_refine_ls_hydrogen_treatment     constr
_refine_ls_extinction_method      SHELXL
_refine_ls_extinction_coef        0.0054(4)
_refine_ls_extinction_expression
 'Fc^*^=kFc[1+0.001xFc^2^\l^3^/sin(2\q)]^-1/4^'
_refine_ls_number_reflns          4504
_refine_ls_number_parameters      263
_refine_ls_number_restraints      0
_refine_ls_R_factor_all           0.0675
_refine_ls_R_factor_gt            0.0644
_refine_ls_wR_factor_ref          0.1629
_refine_ls_wR_factor_gt           0.1613
_refine_ls_goodness_of_fit_ref    1.187
_refine_ls_restrained_S_all       1.187
_refine_ls_shift/su_max           0.000
_refine_ls_shift/su_mean          0.000
 
loop_
 _atom_site_label
 _atom_site_type_symbol
 _atom_site_fract_x
 _atom_site_fract_y
 _atom_site_fract_z
 _atom_site_U_iso_or_equiv
 _atom_site_adp_type
 _atom_site_occupancy
 _atom_site_site_symmetry_order  
 _atom_site_calc_flag
 _atom_site_refinement_flags_posn
 _atom_site_refinement_flags_adp
 _atom_site_refinement_flags_occupancy
 _atom_site_disorder_assembly
 _atom_site_disorder_group
Pt1 Pt 0.21856(4) 0.25499(5) 0.35511(2) 0.02027(19) Uani 1 1 d . . . . .
N20 N 0.1722(8) 0.3182(13) 0.4501(5) 0.024(2) Uani 1 1 d . . . . .
N10 N 0.3419(7) 0.4412(12) 0.3982(4) 0.0189(18) Uani 1 1 d . . . . .
C25 C 0.0827(11) 0.2518(15) 0.4740(7) 0.031(3) Uani 1 1 d . . . . .
H25 H 0.0387 0.1744 0.4498 0.037 Uiso 1 1 calc R U . . .
C23 C 0.1224(12) 0.4076(17) 0.5683(7) 0.036(3) Uani 1 1 d . . . . .
H23 H 0.1065 0.4348 0.6087 0.044 Uiso 1 1 calc R U . . .
C35 C 0.2108(12) 0.1731(15) 0.2601(5) 0.027(3) Uani 1 1 d . . . . .
H35 H 0.1793 0.2515 0.2274 0.033 Uiso 1 1 calc R U . . .
C11 C 0.3263(9) 0.5061(13) 0.4544(5) 0.021(2) Uani 1 1 d . . . . .
C36 C 0.1223(10) 0.0932(14) 0.2926(6) 0.027(3) Uani 1 1 d . . . . .
H36 H 0.0435 0.1277 0.2772 0.032 Uiso 1 1 calc R U . . .
C12 C 0.3914(9) 0.6382(14) 0.4802(6) 0.023(2) Uani 1 1 d . . . . .
H12 H 0.3787 0.6845 0.5185 0.027 Uiso 1 1 calc R U . . .
C41 C 0.1106(10) 0.4438(15) 0.3199(6) 0.027(2) Uani 1 1 d . . . . .
H41A H 0.1369 0.5408 0.3418 0.041 Uiso 1 1 calc R U . . .
H41B H 0.0339 0.4211 0.3270 0.041 Uiso 1 1 calc R U . . .
H41C H 0.1114 0.4562 0.2747 0.041 Uiso 1 1 calc R U . . .
C33 C 0.3793(11) -0.0045(17) 0.3041(7) 0.034(3) Uani 1 1 d . . . . .
H33A H 0.3476 -0.1118 0.3012 0.040 Uiso 1 1 calc R U . . .
H33B H 0.4603 -0.0125 0.3012 0.040 Uiso 1 1 calc R U . . .
C22 C 0.2111(10) 0.4788(15) 0.5453(6) 0.026(2) Uani 1 1 d . . . . .
H22 H 0.2548 0.5576 0.5689 0.031 Uiso 1 1 calc R U . . .
C34 C 0.3193(12) 0.0954(18) 0.2474(6) 0.036(3) Uani 1 1 d . . . . .
H34A H 0.3717 0.1777 0.2374 0.043 Uiso 1 1 calc R U . . .
H34B H 0.3019 0.0267 0.2101 0.043 Uiso 1 1 calc R U . . .
C31 C 0.2862(10) 0.0210(16) 0.4041(6) 0.029(3) Uani 1 1 d . . . . .
H31 H 0.3112 0.0293 0.4505 0.035 Uiso 1 1 calc R U . . .
C24 C 0.0554(11) 0.2942(18) 0.5316(7) 0.036(3) Uani 1 1 d . . . . .
H24 H -0.0072 0.2482 0.5465 0.043 Uiso 1 1 calc R U . . .
C37 C 0.1333(11) -0.0799(15) 0.3131(6) 0.029(3) Uani 1 1 d . . . . .
H37A H 0.1777 -0.1367 0.2853 0.034 Uiso 1 1 calc R U . . .
H37B H 0.0576 -0.1278 0.3079 0.034 Uiso 1 1 calc R U . . .
C38 C 0.1921(12) -0.0998(16) 0.3841(7) 0.035(3) Uani 1 1 d . . . . .
H38A H 0.1345 -0.0892 0.4120 0.042 Uiso 1 1 calc R U . . .
H38B H 0.2241 -0.2066 0.3898 0.042 Uiso 1 1 calc R U . . .
C13 C 0.4754(10) 0.6983(15) 0.4470(6) 0.027(3) Uani 1 1 d . . . . .
H13 H 0.5206 0.7844 0.4634 0.033 Uiso 1 1 calc R U . . .
C15 C 0.4225(10) 0.5006(15) 0.3663(6) 0.027(2) Uani 1 1 d . . . . .
H15 H 0.4329 0.4542 0.3275 0.033 Uiso 1 1 calc R U . . .
C14 C 0.4907(10) 0.6292(16) 0.3897(6) 0.028(3) Uani 1 1 d . . . . .
H14 H 0.5462 0.6683 0.3669 0.033 Uiso 1 1 calc R U . . .
C21 C 0.2351(9) 0.4303(13) 0.4850(5) 0.021(2) Uani 1 1 d . . . . .
C32 C 0.3662(10) 0.0656(14) 0.3676(6) 0.026(2) Uani 1 1 d . . . . .
H32 H 0.4381 0.1040 0.3926 0.031 Uiso 1 1 calc R U . . .
Sb1 Sb 0.24840(7) 0.58575(10) 0.13293(4) 0.0261(2) Uani 1 1 d . . . . .
F1 F 0.1695(9) 0.7638(10) 0.1579(5) 0.050(2) Uani 1 1 d . . . . .
F2 F 0.3274(9) 0.4104(12) 0.1067(6) 0.065(3) Uani 1 1 d . . . . .
F3 F 0.3114(9) 0.5404(14) 0.2181(5) 0.062(3) Uani 1 1 d . . . . .
F4 F 0.1232(7) 0.4573(11) 0.1393(4) 0.045(2) Uani 1 1 d . . . . .
F5 F 0.1890(7) 0.6326(11) 0.0468(4) 0.0413(19) Uani 1 1 d . . . . .
F6 F 0.3736(7) 0.7195(11) 0.1257(5) 0.045(2) Uani 1 1 d . . . . .
 
loop_
 _atom_site_aniso_label
 _atom_site_aniso_U_11
 _atom_site_aniso_U_22
 _atom_site_aniso_U_33
 _atom_site_aniso_U_23
 _atom_site_aniso_U_13
 _atom_site_aniso_U_12
Pt1 0.0182(3) 0.0244(3) 0.0173(3) 0.00134(15) -0.00009(17) -0.00250(15)
N20 0.018(4) 0.033(5) 0.021(5) -0.002(4) 0.007(4) -0.003(4)
N10 0.012(4) 0.031(5) 0.015(4) 0.001(4) 0.006(3) -0.005(4)
C25 0.022(6) 0.035(7) 0.034(7) 0.001(5) 0.002(5) -0.011(5)
C23 0.039(7) 0.039(7) 0.034(7) -0.004(6) 0.014(6) -0.002(6)
C35 0.046(7) 0.032(6) 0.005(4) -0.006(4) 0.009(5) -0.004(5)
C11 0.020(5) 0.021(5) 0.021(5) -0.004(4) 0.002(4) 0.001(4)
C36 0.028(6) 0.023(5) 0.024(6) -0.001(5) -0.012(5) -0.014(5)
C12 0.019(5) 0.024(5) 0.026(6) 0.001(4) 0.006(4) -0.001(4)
C41 0.021(5) 0.032(6) 0.027(6) 0.001(5) 0.001(5) 0.007(5)
C33 0.027(6) 0.039(7) 0.041(7) -0.012(6) 0.022(6) 0.000(5)
C22 0.025(5) 0.035(6) 0.017(5) 0.001(5) 0.007(4) -0.002(5)
C34 0.044(7) 0.042(7) 0.027(6) -0.019(6) 0.021(6) 0.002(6)
C31 0.026(6) 0.034(6) 0.024(6) 0.006(5) -0.008(5) 0.004(5)
C24 0.025(6) 0.048(8) 0.037(7) 0.015(6) 0.012(6) -0.009(6)
C37 0.029(6) 0.027(6) 0.028(6) -0.005(5) -0.001(5) -0.002(5)
C38 0.034(7) 0.032(7) 0.037(7) -0.001(6) 0.002(6) 0.002(5)
C13 0.022(5) 0.027(6) 0.035(7) 0.004(5) 0.009(5) -0.006(5)
C15 0.027(6) 0.032(6) 0.024(6) 0.004(5) 0.008(5) -0.003(5)
C14 0.021(5) 0.037(7) 0.025(6) 0.005(5) 0.003(5) -0.009(5)
C21 0.020(5) 0.024(5) 0.020(5) -0.003(4) 0.002(4) 0.002(4)
C32 0.025(5) 0.027(6) 0.026(6) -0.012(5) 0.008(5) 0.001(5)
Sb1 0.0216(4) 0.0317(4) 0.0252(4) 0.0059(3) 0.0048(3) 0.0037(3)
F1 0.057(6) 0.039(5) 0.054(6) -0.015(4) 0.015(5) 0.004(4)
F2 0.060(6) 0.047(5) 0.091(8) 0.002(6) 0.022(6) 0.021(5)
F3 0.056(6) 0.089(8) 0.037(5) 0.026(5) -0.008(4) -0.007(6)
F4 0.038(4) 0.045(5) 0.051(5) 0.003(4) 0.008(4) -0.011(4)
F5 0.043(4) 0.053(5) 0.027(4) 0.005(4) 0.002(4) 0.005(4)
F6 0.030(4) 0.053(5) 0.050(5) 0.020(4) -0.003(4) -0.008(4)
 
_geom_special_details
;
 All esds (except the esd in the dihedral angle between two l.s. planes)
 are estimated using the full covariance matrix.  The cell esds are taken
 into account individually in the estimation of esds in distances, angles
 and torsion angles; correlations between esds in cell parameters are only
 used when they are defined by crystal symmetry.  An approximate (isotropic)
 treatment of cell esds is used for estimating esds involving l.s. planes.
;
 
loop_
 _geom_bond_atom_site_label_1
 _geom_bond_atom_site_label_2
 _geom_bond_distance
 _geom_bond_site_symmetry_2
 _geom_bond_publ_flag
Pt1 C41 2.090(11) . ?
Pt1 C36 2.093(10) . ?
Pt1 C35 2.105(10) . ?
Pt1 N20 2.222(10) . ?
Pt1 N10 2.225(9) . ?
Pt1 C31 2.295(12) . ?
Pt1 C32 2.339(12) . ?
N20 C21 1.341(14) . ?
N20 C25 1.357(16) . ?
N10 C11 1.341(14) . ?
N10 C15 1.345(15) . ?
C25 C24 1.35(2) . ?
C25 H25 0.9300 . ?
C23 C22 1.359(18) . ?
C23 C24 1.39(2) . ?
C23 H23 0.9300 . ?
C35 C36 1.495(18) . ?
C35 C34 1.498(18) . ?
C35 H35 0.9800 . ?
C11 C12 1.405(15) . ?
C11 C21 1.482(16) . ?
C36 C37 1.509(17) . ?
C36 H36 0.9800 . ?
C12 C13 1.393(17) . ?
C12 H12 0.9300 . ?
C41 H41A 0.9600 . ?
C41 H41B 0.9600 . ?
C41 H41C 0.9600 . ?
C33 C32 1.491(17) . ?
C33 C34 1.54(2) . ?
C33 H33A 0.9700 . ?
C33 H33B 0.9700 . ?
C22 C21 1.406(16) . ?
C22 H22 0.9300 . ?
C34 H34A 0.9700 . ?
C34 H34B 0.9700 . ?
C31 C32 1.360(18) . ?
C31 C38 1.511(18) . ?
C31 H31 0.9800 . ?
C24 H24 0.9300 . ?
C37 C38 1.556(17) . ?
C37 H37A 0.9700 . ?
C37 H37B 0.9700 . ?
C38 H38A 0.9700 . ?
C38 H38B 0.9700 . ?
C13 C14 1.377(18) . ?
C13 H13 0.9300 . ?
C15 C14 1.386(17) . ?
C15 H15 0.9300 . ?
C14 H14 0.9300 . ?
C32 H32 0.9800 . ?
Sb1 F4 1.848(8) . ?
Sb1 F2 1.867(10) . ?
Sb1 F3 1.871(9) . ?
Sb1 F1 1.874(9) . ?
Sb1 F6 1.878(8) . ?
Sb1 F5 1.882(8) . ?
 
loop_
 _geom_angle_atom_site_label_1
 _geom_angle_atom_site_label_2
 _geom_angle_atom_site_label_3
 _geom_angle
 _geom_angle_site_symmetry_1
 _geom_angle_site_symmetry_3
 _geom_angle_publ_flag
C41 Pt1 C36 91.4(5) . . ?
C41 Pt1 C35 88.5(5) . . ?
C36 Pt1 C35 41.7(5) . . ?
C41 Pt1 N20 85.3(4) . . ?
C36 Pt1 N20 122.3(4) . . ?
C35 Pt1 N20 162.8(4) . . ?
C41 Pt1 N10 86.6(4) . . ?
C36 Pt1 N10 164.6(4) . . ?
C35 Pt1 N10 122.9(4) . . ?
N20 Pt1 N10 72.8(3) . . ?
C41 Pt1 C31 162.3(5) . . ?
C36 Pt1 C31 81.3(4) . . ?
C35 Pt1 C31 96.4(5) . . ?
N20 Pt1 C31 85.1(4) . . ?
N10 Pt1 C31 104.7(4) . . ?
C41 Pt1 C32 162.4(5) . . ?
C36 Pt1 C32 87.4(5) . . ?
C35 Pt1 C32 78.9(5) . . ?
N20 Pt1 C32 110.1(4) . . ?
N10 Pt1 C32 89.9(4) . . ?
C31 Pt1 C32 34.1(4) . . ?
C21 N20 C25 118.7(11) . . ?
C21 N20 Pt1 117.8(8) . . ?
C25 N20 Pt1 123.6(8) . . ?
C11 N10 C15 119.9(10) . . ?
C11 N10 Pt1 118.1(7) . . ?
C15 N10 Pt1 121.6(8) . . ?
C24 C25 N20 122.3(12) . . ?
C24 C25 H25 118.8 . . ?
N20 C25 H25 118.8 . . ?
C22 C23 C24 120.3(13) . . ?
C22 C23 H23 119.8 . . ?
C24 C23 H23 119.8 . . ?
C36 C35 C34 124.5(12) . . ?
C36 C35 Pt1 68.7(6) . . ?
C34 C35 Pt1 113.6(8) . . ?
C36 C35 H35 113.9 . . ?
C34 C35 H35 113.9 . . ?
Pt1 C35 H35 113.9 . . ?
N10 C11 C12 121.1(11) . . ?
N10 C11 C21 114.9(9) . . ?
C12 C11 C21 123.9(10) . . ?
C35 C36 C37 121.6(12) . . ?
C35 C36 Pt1 69.5(6) . . ?
C37 C36 Pt1 115.2(7) . . ?
C35 C36 H36 114.3 . . ?
C37 C36 H36 114.3 . . ?
Pt1 C36 H36 114.3 . . ?
C13 C12 C11 118.6(11) . . ?
C13 C12 H12 120.7 . . ?
C11 C12 H12 120.7 . . ?
Pt1 C41 H41A 109.5 . . ?
Pt1 C41 H41B 109.5 . . ?
H41A C41 H41B 109.5 . . ?
Pt1 C41 H41C 109.5 . . ?
H41A C41 H41C 109.5 . . ?
H41B C41 H41C 109.5 . . ?
C32 C33 C34 112.6(11) . . ?
C32 C33 H33A 109.1 . . ?
C34 C33 H33A 109.1 . . ?
C32 C33 H33B 109.1 . . ?
C34 C33 H33B 109.1 . . ?
H33A C33 H33B 107.8 . . ?
C23 C22 C21 118.2(12) . . ?
C23 C22 H22 120.9 . . ?
C21 C22 H22 120.9 . . ?
C35 C34 C33 113.6(11) . . ?
C35 C34 H34A 108.9 . . ?
C33 C34 H34A 108.9 . . ?
C35 C34 H34B 108.9 . . ?
C33 C34 H34B 108.9 . . ?
H34A C34 H34B 107.7 . . ?
C32 C31 C38 124.9(12) . . ?
C32 C31 Pt1 74.7(7) . . ?
C38 C31 Pt1 104.8(7) . . ?
C32 C31 H31 114.7 . . ?
C38 C31 H31 114.7 . . ?
Pt1 C31 H31 114.7 . . ?
C25 C24 C23 118.9(12) . . ?
C25 C24 H24 120.6 . . ?
C23 C24 H24 120.6 . . ?
C36 C37 C38 112.5(10) . . ?
C36 C37 H37A 109.1 . . ?
C38 C37 H37A 109.1 . . ?
C36 C37 H37B 109.1 . . ?
C38 C37 H37B 109.1 . . ?
H37A C37 H37B 107.8 . . ?
C31 C38 C37 113.2(11) . . ?
C31 C38 H38A 108.9 . . ?
C37 C38 H38A 108.9 . . ?
C31 C38 H38B 108.9 . . ?
C37 C38 H38B 108.9 . . ?
H38A C38 H38B 107.8 . . ?
C14 C13 C12 119.4(11) . . ?
C14 C13 H13 120.3 . . ?
C12 C13 H13 120.3 . . ?
N10 C15 C14 121.7(12) . . ?
N10 C15 H15 119.1 . . ?
C14 C15 H15 119.1 . . ?
C13 C14 C15 119.2(11) . . ?
C13 C14 H14 120.4 . . ?
C15 C14 H14 120.4 . . ?
N20 C21 C22 121.6(11) . . ?
N20 C21 C11 116.0(10) . . ?
C22 C21 C11 122.3(10) . . ?
C31 C32 C33 125.4(11) . . ?
C31 C32 Pt1 71.2(7) . . ?
C33 C32 Pt1 110.2(8) . . ?
C31 C32 H32 114.0 . . ?
C33 C32 H32 114.0 . . ?
Pt1 C32 H32 114.0 . . ?
F4 Sb1 F2 90.5(5) . . ?
F4 Sb1 F3 90.8(4) . . ?
F2 Sb1 F3 89.0(5) . . ?
F4 Sb1 F1 90.1(4) . . ?
F2 Sb1 F1 179.0(5) . . ?
F3 Sb1 F1 91.8(5) . . ?
F4 Sb1 F6 178.9(4) . . ?
F2 Sb1 F6 90.4(5) . . ?
F3 Sb1 F6 90.0(4) . . ?
F1 Sb1 F6 89.0(5) . . ?
F4 Sb1 F5 90.6(4) . . ?
F2 Sb1 F5 90.3(5) . . ?
F3 Sb1 F5 178.5(4) . . ?
F1 Sb1 F5 88.8(4) . . ?
F6 Sb1 F5 88.7(4) . . ?
 
loop_
 _geom_torsion_atom_site_label_1
 _geom_torsion_atom_site_label_2
 _geom_torsion_atom_site_label_3
 _geom_torsion_atom_site_label_4
 _geom_torsion
 _geom_torsion_site_symmetry_1
 _geom_torsion_site_symmetry_2
 _geom_torsion_site_symmetry_3
 _geom_torsion_site_symmetry_4
 _geom_torsion_publ_flag
C21 N20 C25 C24 -0.3(19) . . . . ?
Pt1 N20 C25 C24 -179.0(10) . . . . ?
C15 N10 C11 C12 1.4(16) . . . . ?
Pt1 N10 C11 C12 -171.6(8) . . . . ?
C15 N10 C11 C21 -179.9(10) . . . . ?
Pt1 N10 C11 C21 7.0(12) . . . . ?
C34 C35 C36 C37 -3.0(16) . . . . ?
Pt1 C35 C36 C37 -107.7(10) . . . . ?
C34 C35 C36 Pt1 104.7(11) . . . . ?
N10 C11 C12 C13 -1.8(17) . . . . ?
C21 C11 C12 C13 179.6(11) . . . . ?
C24 C23 C22 C21 -2(2) . . . . ?
C36 C35 C34 C33 -42.5(16) . . . . ?
Pt1 C35 C34 C33 37.2(14) . . . . ?
C32 C33 C34 C35 -34.6(16) . . . . ?
N20 C25 C24 C23 -1(2) . . . . ?
C22 C23 C24 C25 3(2) . . . . ?
C35 C36 C37 C38 93.7(14) . . . . ?
Pt1 C36 C37 C38 13.1(15) . . . . ?
C32 C31 C38 C37 -42.9(17) . . . . ?
Pt1 C31 C38 C37 38.6(13) . . . . ?
C36 C37 C38 C31 -36.3(16) . . . . ?
C11 C12 C13 C14 1.2(17) . . . . ?
C11 N10 C15 C14 -0.4(17) . . . . ?
Pt1 N10 C15 C14 172.4(9) . . . . ?
C12 C13 C14 C15 -0.3(18) . . . . ?
N10 C15 C14 C13 -0.2(19) . . . . ?
C25 N20 C21 C22 0.6(17) . . . . ?
Pt1 N20 C21 C22 179.3(8) . . . . ?
C25 N20 C21 C11 -175.9(10) . . . . ?
Pt1 N20 C21 C11 2.9(13) . . . . ?
C23 C22 C21 N20 0.7(18) . . . . ?
C23 C22 C21 C11 177.0(11) . . . . ?
N10 C11 C21 N20 -6.5(15) . . . . ?
C12 C11 C21 N20 172.1(10) . . . . ?
N10 C11 C21 C22 177.1(10) . . . . ?
C12 C11 C21 C22 -4.3(17) . . . . ?
C38 C31 C32 C33 -4(2) . . . . ?
Pt1 C31 C32 C33 -101.9(13) . . . . ?
C38 C31 C32 Pt1 97.6(11) . . . . ?
C34 C33 C32 C31 96.8(16) . . . . ?
C34 C33 C32 Pt1 16.0(13) . . . . ?
 
_refine_diff_density_max    4.279
_refine_diff_density_min   -3.242
_refine_diff_density_rms    0.332

_shelxl_version_number 2013-4

_shelx_res_file
;
TITL shelx in P21/c              New: P21/c
CELL  0.71073  11.8078   8.3564  21.0767   90.000   99.052   90.000
ZERR     4.00   0.0009   0.0007   0.0018    0.000    0.006    0.000
LATT   1
SYMM  - X, 1/2 + Y, 1/2 - Z
SFAC  C    H    F    N    PT   SB
UNIT  76   92   24   8    4    4
MERG   2
OMIT     2   0   0
OMIT     5   3   1
OMIT     7   9   6
OMIT    -2   0   4
OMIT     0   1   2
OMIT     2   6   3
FMAP   2
PLAN   20
ACTA    50.00
BOND   $H
CONF
L.S.  15
WGHT    0.041100   62.974403
EXTI    0.005412
FVAR       0.24821
PT1   5    0.218559    0.254990    0.355108    11.00000    0.01821    0.02436 =
         0.01732    0.00134   -0.00009   -0.00250
N20   4    0.172177    0.318185    0.450145    11.00000    0.01847    0.03271 =
         0.02126   -0.00232    0.00710   -0.00296
N10   4    0.341861    0.441194    0.398201    11.00000    0.01161    0.03106 =
         0.01532    0.00133    0.00634   -0.00500
C25   1    0.082746    0.251771    0.473953    11.00000    0.02178    0.03499 =
         0.03422    0.00101    0.00154   -0.01112
AFIX  43
H25   2    0.038709    0.174371    0.449782    11.00000   -1.20000
AFIX   0
C23   1    0.122401    0.407555    0.568283    11.00000    0.03928    0.03895 =
         0.03369   -0.00390    0.01389   -0.00245
AFIX  43
H23   2    0.106472    0.434825    0.608741    11.00000   -1.20000
AFIX   0
C35   1    0.210820    0.173138    0.260093    11.00000    0.04636    0.03198 =
         0.00539   -0.00582    0.00931   -0.00384
AFIX  13
H35   2    0.179337    0.251531    0.227443    11.00000   -1.20000
AFIX   0
C11   1    0.326325    0.506087    0.454363    11.00000    0.01983    0.02058 =
         0.02105   -0.00436    0.00166    0.00121
C36   1    0.122340    0.093171    0.292644    11.00000    0.02814    0.02338 =
         0.02407   -0.00125   -0.01208   -0.01437
AFIX  13
H36   2    0.043512    0.127729    0.277198    11.00000   -1.20000
AFIX   0
C12   1    0.391407    0.638197    0.480155    11.00000    0.01896    0.02398 =
         0.02602    0.00095    0.00567   -0.00101
AFIX  43
H12   2    0.378739    0.684543    0.518538    11.00000   -1.20000
AFIX   0
C41   1    0.110629    0.443788    0.319896    11.00000    0.02128    0.03221 =
         0.02659    0.00059    0.00054    0.00653
AFIX  33
H41A  2    0.136943    0.540771    0.341815    11.00000   -1.50000
H41B  2    0.033913    0.421122    0.327006    11.00000   -1.50000
H41C  2    0.111445    0.456208    0.274689    11.00000   -1.50000
AFIX   0
C33   1    0.379309   -0.004456    0.304132    11.00000    0.02690    0.03857 =
         0.04062   -0.01157    0.02209    0.00021
AFIX  23
H33A  2    0.347619   -0.111781    0.301205    11.00000   -1.20000
H33B  2    0.460279   -0.012502    0.301211    11.00000   -1.20000
AFIX   0
C22   1    0.211140    0.478846    0.545347    11.00000    0.02517    0.03538 =
         0.01744    0.00092    0.00733   -0.00220
AFIX  43
H22   2    0.254804    0.557573    0.568922    11.00000   -1.20000
AFIX   0
C34   1    0.319346    0.095356    0.247449    11.00000    0.04370    0.04207 =
         0.02743   -0.01875    0.02100    0.00165
AFIX  23
H34A  2    0.371678    0.177694    0.237430    11.00000   -1.20000
H34B  2    0.301919    0.026664    0.210088    11.00000   -1.20000
AFIX   0
C31   1    0.286190    0.021011    0.404059    11.00000    0.02586    0.03376 =
         0.02361    0.00583   -0.00757    0.00400
AFIX  13
H31   2    0.311199    0.029271    0.450533    11.00000   -1.20000
AFIX   0
C24   1    0.055380    0.294217    0.531646    11.00000    0.02470    0.04814 =
         0.03744    0.01494    0.01175   -0.00923
AFIX  43
H24   2   -0.007242    0.248242    0.546483    11.00000   -1.20000
AFIX   0
C37   1    0.133313   -0.079888    0.313076    11.00000    0.02861    0.02713 =
         0.02810   -0.00496   -0.00108   -0.00187
AFIX  23
H37A  2    0.177714   -0.136742    0.285264    11.00000   -1.20000
H37B  2    0.057591   -0.127789    0.307916    11.00000   -1.20000
AFIX   0
C38   1    0.192065   -0.099784    0.384085    11.00000    0.03382    0.03229 =
         0.03694   -0.00097    0.00219    0.00182
AFIX  23
H38A  2    0.134537   -0.089197    0.411991    11.00000   -1.20000
H38B  2    0.224121   -0.206643    0.389835    11.00000   -1.20000
AFIX   0
C13   1    0.475359    0.698302    0.446983    11.00000    0.02230    0.02682 =
         0.03466    0.00369    0.00922   -0.00641
AFIX  43
H13   2    0.520615    0.784388    0.463428    11.00000   -1.20000
AFIX   0
C15   1    0.422549    0.500586    0.366284    11.00000    0.02693    0.03199 =
         0.02390    0.00407    0.00792   -0.00259
AFIX  43
H15   2    0.432869    0.454157    0.327501    11.00000   -1.20000
AFIX   0
C14   1    0.490742    0.629189    0.389670    11.00000    0.02146    0.03728 =
         0.02459    0.00538    0.00336   -0.00939
AFIX  43
H14   2    0.546220    0.668307    0.366913    11.00000   -1.20000
AFIX   0
C21   1    0.235138    0.430304    0.484976    11.00000    0.02007    0.02365 =
         0.01993   -0.00264    0.00247    0.00217
C32   1    0.366207    0.065605    0.367625    11.00000    0.02535    0.02674 =
         0.02637   -0.01156    0.00828    0.00112
AFIX  13
H32   2    0.438136    0.103977    0.392591    11.00000   -1.20000
AFIX   0
SB1   6    0.248404    0.585754    0.132929    11.00000    0.02160    0.03174 =
         0.02520    0.00590    0.00480    0.00372
F1    3    0.169533    0.763803    0.157927    11.00000    0.05748    0.03944 =
         0.05390   -0.01540    0.01456    0.00418
F2    3    0.327439    0.410396    0.106730    11.00000    0.06022    0.04715 =
         0.09088    0.00167    0.02227    0.02054
F3    3    0.311385    0.540432    0.218130    11.00000    0.05594    0.08853 =
         0.03675    0.02570   -0.00797   -0.00654
F4    3    0.123250    0.457297    0.139299    11.00000    0.03759    0.04534 =
         0.05103    0.00285    0.00784   -0.01067
F5    3    0.188968    0.632643    0.046782    11.00000    0.04325    0.05305 =
         0.02651    0.00498    0.00188    0.00478
F6    3    0.373598    0.719489    0.125700    11.00000    0.02989    0.05331 =
         0.05014    0.02015   -0.00269   -0.00812
HKLF    4

REM  shelx in P21/c              New: P21/c
REM R1 =  0.0644 for    4154 Fo > 4sig(Fo)  and  0.0675 for all    4504 data
REM    263 parameters refined using      0 restraints

END

WGHT      0.0412     62.9793

REM Highest difference peak  4.279,  deepest hole -3.242,  1-sigma level  0.332
Q1    1   0.2211  0.3606  0.3557  11.00000  0.05    4.28
Q2    1   0.2219  0.1504  0.3546  11.00000  0.05    4.17
Q3    1   0.2479  0.4846  0.1319  11.00000  0.05    2.38
Q4    1   0.2486  0.6929  0.1334  11.00000  0.05    2.34
Q5    1   0.1486  0.1530  0.3635  11.00000  0.05    1.77
Q6    1   0.1477  0.3761  0.3666  11.00000  0.05    1.70
Q7    1   0.2933  0.1551  0.3555  11.00000  0.05    1.64
Q8    1   0.1564  0.1823  0.3874  11.00000  0.05    1.45
Q9    1   0.2260  0.2532  0.4000  11.00000  0.05    1.38
Q10   1   0.4590  0.4135  0.3640  11.00000  0.05    1.37
Q11   1   0.2960  0.3517  0.3415  11.00000  0.05    1.35
Q12   1   0.0705  0.7449  0.1459  11.00000  0.05    1.35
Q13   1   0.4632  0.2568  0.3593  11.00000  0.05    1.30
Q14   1   0.5524  0.5732  0.3598  11.00000  0.05    1.29
Q15   1   0.1173  0.5592  0.3567  11.00000  0.05    1.28
Q16   1   0.2283  0.5265  0.6398  11.00000  0.05    1.27
Q17   1   0.2428  0.5866  0.0891  11.00000  0.05    1.26
Q18   1   0.2398  0.8275  0.1320  11.00000  0.05    1.22
Q19   1   0.1612  0.0647  0.3481  11.00000  0.05    1.21
Q20   1   0.3245  0.5931  0.1266  11.00000  0.05    1.20
;
_shelx_res_checksum   23847

_shelx_hkl_file
;
 -14   3   9   10.29    6.49   0  0.16190
 -13   3   6  257.34    6.47   0  0.17708
 -13   4   4  210.35    6.18   0  0.18402
 -12   3   4  472.60    6.48   0  0.18853
 -12   4   2  224.07    5.52   0  0.19824
 -12   6  -1    3.06    4.63   0  0.21787
 -11   3   2  524.12    6.28   0  0.19884
 -11   4   0  271.13    5.12   0  0.21055
  -9   2   1  159.87    4.76   0  0.20638
  -9   3  -1   19.09    3.98   0  0.21843
  -9   5  -4  485.76    5.15   0  0.23827
  -9   6  -5   13.52    4.01   0  0.24564
  -8   4  -4  517.08    5.16   0  0.23639
  -8   5  -5    6.63    3.65   0  0.24510
  -8   6  -6  366.93    4.75   0  0.25193
  -8   8  -7   27.24    4.11   0  0.26042
  -7   1   1   58.97    4.26   0  0.20929
  -7   4  -5  157.17    4.10   0  0.24293
  -7   5  -6  743.67    5.50   0  0.25096
  -7   6  -7    2.82    3.70   0  0.25741
  -7   8  -8   57.26    4.03   0  0.26530
  -6   5  -7  394.25    4.61   0  0.25608
  -5   0   2   64.96    4.45   0  0.20629
  -5   1  -1  476.65    5.87   0  0.21852
  -5   3  -5   25.16    3.71   0  0.24288
  -4   4  -7   94.21    3.66   0  0.25574
  -4   6  -9   15.26    3.45   0  0.26844
  -4   8 -10  198.74    4.24   0  0.27532
  -2   5  -9   64.28    3.53   0  0.26731
  -2   9 -11   10.99    3.67   0  0.28095
   2  -2  12  996.76    7.93   0  0.17071
   3  -2  16  214.69    5.75   0  0.16447
   3  -2  17   53.16    5.32   0  0.16390
   3  -2  18  319.52    6.34   0  0.16559
   3   0   1    9.41    4.25   0  0.20752
   5   0   3    1.65    3.81   0  0.19711
   6  -1  12  125.53    5.50   0  0.16244
   6  -1  23   18.98    5.40   0  0.19318
   7   1   2 1624.30    9.53   0  0.19738
   8   1   4 1039.74    7.76   0  0.18491
   9   1   7   59.73    5.23   0  0.16851
  10   1  13   -0.13    6.30   0  0.14707
  10   1  14  122.35    6.88   0  0.14646
  10   1  16  113.73    7.04   0  0.14763
  10   1  17    2.83    6.80   0  0.15038
  11   2  10  163.03    6.75   0  0.14771
 -14   2  12    6.51    9.81   0  0.15281
 -14   3   8  353.03    9.88   0  0.16411
 -13   1  14  323.38   11.14   0  0.15223
 -13   2   9   16.11    8.51   0  0.16604
 -13   3   5   -3.36    7.57   0  0.17905
 -13   4   3   79.42    7.75   0  0.18564
 -13   5   1   28.55    5.28   0  0.19720
 -13   5   2  100.88    7.56   0  0.19536
 -12   1  10  189.35    8.80   0  0.16567
 -12   2   6  587.03    8.80   0  0.17955
 -12   3   3    5.56    7.08   0  0.18899
 -12   4   1   24.46    6.88   0  0.19884
 -12   5   0  102.63    6.75   0  0.20856
 -12   6  -2   36.00    4.82   0  0.21877
 -11   1   7   90.71    7.44   0  0.17770
 -11   2   4  554.87    7.95   0  0.19033
 -11   3   1   10.33    6.34   0  0.19937
 -11   4  -1   64.44    4.52   0  0.21090
 -11   5  -2  152.33    6.62   0  0.21898
 -11   6  -3   -3.53    6.27   0  0.22867
 -10   1   5   28.14    6.49   0  0.18825
 -10   2   2 1224.92    9.08   0  0.19937
 -10   3   0  389.33    6.79   0  0.21003
 -10   4  -2  468.17    6.85   0  0.21942
 -10   5  -3   27.98    5.64   0  0.22982
 -10   6  -4   77.14    5.89   0  0.23813
 -10   7  -5   47.82    6.15   0  0.24374
  -9   0   7   -5.94    6.61   0  0.18200
  -9   1   3  169.90    6.65   0  0.19525
  -9   3  -2  956.45    6.53   0  0.21777
  -9   5  -5  130.02    4.29   0  0.23776
  -9   6  -6  724.82    5.76   0  0.24520
  -8   1   2  367.88    6.93   0  0.20379
  -8   2  -1  213.05    6.18   0  0.21299
  -8   5  -6  281.06    4.44   0  0.24423
  -8   6  -7   32.83    3.93   0  0.25096
  -8   8  -8  263.90    4.74   0  0.25959
  -7   0   4  750.07    8.91   0  0.19605
  -7   2  -2   65.41    5.45   0  0.21937
  -7   8  -9   15.56    3.95   0  0.26406
  -6   2  -3  372.56    6.25   0  0.22413
  -6   3  -5   28.61    3.75   0  0.23545
  -5   4  -7  471.24    6.04   0  0.24998
  -5   5  -8  968.04    6.76   0  0.25831
  -4  -2  26   14.85    7.04   0  0.22087
  -4   0   1    9.55    5.73   0  0.20724
  -4   1  -2  689.32    7.79   0  0.21882
  -4   2  -4  243.85    5.70   0  0.23432
  -4   3  -6  268.13    5.57   0  0.24323
  -4   7 -10   71.25    4.97   0  0.27191
  -4   9 -11    3.37    3.83   0  0.27520
  -3  -2  26  153.73    7.37   0  0.22147
  -3   4  -8 2320.13    9.26   0  0.25559
  -3   5  -9  223.09    5.26   0  0.26287
  -3   6 -10  352.52    5.64   0  0.26816
  -2  -2  26   -2.26    6.67   0  0.22141
  -2   2  -5  213.13    5.91   0  0.23571
  -2   4  -8  103.08    4.86   0  0.26070
  -2   6 -10 1247.06    7.38   0  0.27254
  -1  -2  10 1090.29   10.54   0  0.17599
  -1  -2  25   25.55    6.76   0  0.21500
  -1  -2  26  126.06    7.14   0  0.22209
  -1   0   0  250.49   12.07   0  0.21357
  -1   2  -5   30.36    5.02   0  0.24123
  -1   3  -7  211.10    5.33   0  0.24918
  -1   7 -11    1.87    4.81   0  0.27459
   0  -2  11   12.98    6.73   0  0.17109
   0  -2  24  480.51    8.07   0  0.20811
   0  -2  25   36.38    6.88   0  0.21501
   0  -1   4 1937.91   15.92   0  0.19313
   0   3  -7    9.72    4.60   0  0.24949
   0   7 -11   51.09    4.85   0  0.27797
   1  -2  11  651.29    8.67   0  0.17401
   1  -2  12 2907.36   13.62   0  0.16835
   1  -2  22  319.89    6.00   0  0.19210
   1  -2  23   35.03    6.97   0  0.19971
   1  -2  24    9.78    6.92   0  0.20612
   1   3  -7   11.80    4.69   0  0.24942
   1   7 -11   45.71    4.80   0  0.27791
   2  -2  13  164.48    7.11   0  0.16887
   2  -2  14 1018.25    9.57   0  0.16455
   2  -2  15    3.74    7.20   0  0.16372
   2  -2  16  771.19    7.59   0  0.16315
   2  -2  17   94.36    5.50   0  0.16343
   2  -2  18   61.36    5.30   0  0.16560
   2  -2  19    3.36    7.21   0  0.16905
   2  -2  20  849.02    9.13   0  0.17603
   2  -2  21   96.24    7.40   0  0.18305
   2  -2  22   46.06    7.16   0  0.18875
   2  -1   5 1174.52   10.40   0  0.18780
   2   7 -11   15.87    4.72   0  0.27506
   3  -1   6 1168.19    9.83   0  0.18282
   4  -1   7  413.93    7.38   0  0.18291
   4  -1   8 2444.98   11.11   0  0.17401
   4   0   2 2074.23   12.22   0  0.20282
   4   9 -11    6.03    5.33   0  0.27836
   5  -1   9  425.64    7.67   0  0.17375
   5  -1  10  521.70    8.08   0  0.16537
   5  -1  11    9.91    5.05   0  0.16318
   5  -1  21   46.15    5.47   0  0.18018
   5  -1  22  309.96    6.17   0  0.18925
   5  -1  23    0.53    7.41   0  0.19523
   6  -1  13    5.61    7.25   0  0.16062
   6  -1  14  572.03    8.79   0  0.15866
   6  -1  15   73.00    7.86   0  0.15569
   6  -1  16   -2.21    7.80   0  0.15531
   6  -1  17   10.92    7.86   0  0.15832
   6  -1  18  230.67    8.46   0  0.16159
   6  -1  19   28.75    7.96   0  0.16488
   6  -1  20  107.72    8.05   0  0.16857
   6   0   5   71.40    6.14   0  0.18720
   6   1   1   79.40    5.84   0  0.19827
   7   0   7    0.51    6.45   0  0.17326
   7   0   8  488.94    7.98   0  0.16620
   7   2  -1  149.66    6.12   0  0.21896
   8   0  11    3.12    7.42   0  0.15505
   8   0  12  310.84    8.38   0  0.15446
   8   0  13    7.58    7.75   0  0.15009
   8   0  14   19.21    8.12   0  0.14989
   8   0  15    5.62    8.20   0  0.15208
   8   0  16   96.33    8.56   0  0.15232
   8   0  17   -7.32    8.50   0  0.15505
   8   0  18   39.28    8.67   0  0.15814
   8   0  19    2.04    8.55   0  0.16139
   8   0  20   -3.24    8.72   0  0.16474
   8   1   5   70.00    6.72   0  0.17509
   8   2   1  168.71    6.37   0  0.19806
   8   3  -2  103.46    5.68   0  0.22680
   8   7  -7    0.32    5.17   0  0.25814
   9   1   8 1114.93   10.10   0  0.15872
   9   1   9   97.44    5.78   0  0.15456
   9   2   3  206.29    6.91   0  0.18324
   9   3   0    3.12    5.65   0  0.20750
  10   1  15   58.01    9.48   0  0.14583
  10   2   6  102.65    7.63   0  0.16321
  10   2   7   34.23    5.64   0  0.15721
  10   3   2 1052.30    9.23   0  0.19914
  11   2  11   21.62    9.16   0  0.14556
  11   2  12  130.77    9.78   0  0.14325
  11   2  13    1.68    9.66   0  0.14054
  11   2  14   38.15   10.11   0  0.13908
  11   3   5    2.84    6.99   0  0.17763
  11   3   6   46.32    7.94   0  0.16113
  11   4   2   99.46    6.74   0  0.19889
  12   3  10  206.71   10.47   0  0.14185
  12   3  11    0.93   10.18   0  0.13768
  12   4   5    7.66    7.49   0  0.17680
  12   4   6    6.91    8.17   0  0.16521
  12   5   3    1.78    7.24   0  0.18916
  12   6   1    0.13    6.79   0  0.20912
 -14   2  11    1.31    9.70   0  0.15361
 -14   3   7    6.70    8.61   0  0.16715
 -14   4   4  213.72    9.00   0  0.17616
 -13   1  12   28.34    9.51   0  0.15394
 -13   1  13  109.48   11.94   0  0.15329
 -13   2   7   72.03    8.45   0  0.16871
 -13   2   8  484.56   11.45   0  0.16779
 -13   3   4    0.39    7.52   0  0.17993
 -13   4   2   85.47    7.58   0  0.18764
 -13   5   0  316.46    6.08   0  0.19901
 -12   0  17    0.58   11.99   0  0.15390
 -12   1   9    9.79    9.58   0  0.16681
 -12   2   5  159.49    7.56   0  0.18077
 -12   3   2  626.92    8.62   0  0.19034
 -12   4   0  501.78    8.02   0  0.20046
 -12   5  -1   14.93    6.63   0  0.20974
 -12   6  -3   -1.72    4.80   0  0.21995
 -11   0  12  498.90   12.35   0  0.16136
 -11   1   6 1026.44   10.12   0  0.17724
 -11   2   3   32.10    6.47   0  0.19124
 -11   3   0   22.86    4.47   0  0.20036
 -11   5  -3   85.71    6.54   0  0.21958
 -11   6  -4    9.49    6.23   0  0.22855
 -10   0   9    6.68    8.56   0  0.17187
 -10   1   4 1310.63   10.06   0  0.18656
 -10   2   1  136.57    6.53   0  0.19840
 -10   3  -1   23.35    6.05   0  0.21037
 -10   4  -3    1.61    5.88   0  0.21882
 -10   5  -4  180.13    5.99   0  0.23072
 -10   6  -5   11.36    5.75   0  0.23809
 -10   7  -6  121.48    6.35   0  0.24320
  -9   2   0  565.55    7.36   0  0.20651
  -8   0   5    4.60    7.69   0  0.18901
  -8   1   1  131.64    6.22   0  0.20113
  -7   1   0   58.79    5.71   0  0.20642
  -7   4  -6  204.75    5.63   0  0.24047
  -6  -2  21   62.87    9.13   0  0.18811
  -6  -2  22  293.50   10.20   0  0.19450
  -6   1  -1   92.94    5.71   0  0.21025
  -6   5  -8  980.95    6.89   0  0.25287
  -6   7 -10  112.49    4.07   0  0.26303
  -5  -2  23   64.10    7.12   0  0.20265
  -5  -2  24  389.87    9.96   0  0.20832
  -5   2  -4 3835.69   12.24   0  0.22815
  -5   3  -6 2325.11    9.58   0  0.23744
  -5   5  -9  220.50    4.11   0  0.25576
  -5   8 -11   31.32    3.80   0  0.26918
  -4  -2  12  404.63   10.86   0  0.16937
  -4  -2  24  216.70    7.68   0  0.20902
  -4  -2  25   29.27    8.59   0  0.21459
  -4   4  -8  615.02    6.21   0  0.25062
  -4   5  -9    6.12    4.66   0  0.26100
  -4   6 -10 1120.47    7.05   0  0.26568
  -4   7 -11   42.82    3.65   0  0.26830
  -3  -2  11  984.80   12.92   0  0.17202
  -3  -2  24  293.19    7.92   0  0.20893
  -3  -2  25   11.83    6.96   0  0.21403
  -3   2  -5   45.79    5.25   0  0.23119
  -3   3  -7  191.74    5.42   0  0.24518
  -3   7 -11   13.99    5.03   0  0.27200
  -2  -2  11   32.56    6.62   0  0.16916
  -2  -2  23    8.93    6.83   0  0.20120
  -2  -2  24  386.69    7.85   0  0.20805
  -2  -2  25   44.96    6.94   0  0.21408
  -2   0   0 9845.44   37.43   0  0.20584
  -2   1  -3 2388.32   13.55   0  0.21901
  -2   3  -7   17.32    4.72   0  0.24875
  -2   5 -10   15.11    4.80   0  0.26161
  -2   9 -12  120.43    5.64   0  0.27721
  -1  -2  11  609.09    8.88   0  0.17183
  -1  -2  22  306.39    7.69   0  0.19391
  -1  -2  23  110.69    6.94   0  0.20156
  -1  -2  24   58.45    7.03   0  0.20663
  -1  -1   4  623.37   12.99   0  0.19362
  -1   1  -3 1308.24   11.82   0  0.22414
  -1   5 -10  828.93    6.69   0  0.26253
  -1   6 -11    3.16    4.78   0  0.26788
  -1   8 -12  434.82    6.21   0  0.27522
   0  -2  12  149.74    7.37   0  0.16763
   0  -2  13  580.29    8.72   0  0.16497
   0  -2  21   84.26    7.12   0  0.18620
   0  -2  22    8.41    6.93   0  0.19169
   0  -2  23   -0.79    6.98   0  0.20012
   0   1  -3 3296.57   20.38   0  0.22373
   0   5 -10  521.71    6.13   0  0.26365
   0   6 -11   29.02    4.80   0  0.26803
   0   8 -12    3.13    4.95   0  0.27733
   1  -2  13   18.14    7.04   0  0.16750
   1  -2  14   38.04    7.06   0  0.16509
   1  -2  15  312.84    8.07   0  0.16235
   1  -2  16  738.67    9.22   0  0.16189
   1  -2  17    3.96    7.13   0  0.16352
   1  -2  18  450.91    8.35   0  0.16556
   1  -2  19   91.42    7.43   0  0.17139
   1  -2  20  157.46    7.61   0  0.17687
   1  -2  21   24.72    7.20   0  0.18316
   1   5 -10  953.14    7.55   0  0.26235
   1   6 -11   21.99    4.61   0  0.26783
   1   8 -12  465.91    6.38   0  0.27539
   2   9 -12   90.12    5.61   0  0.27832
   3  -1   7   54.72    6.79   0  0.17467
   3  -1  25   15.35    6.81   0  0.21655
   3   1  -2  383.79   10.99   0  0.21903
   3   4  -8  281.68    7.21   0  0.25658
   3   7 -11   97.96    5.16   0  0.27315
   4  -1   9  107.04    7.02   0  0.16624
   4  -1  22  370.99    8.03   0  0.19241
   4  -1  23   35.17    7.11   0  0.19976
   4  -1  24   70.48    7.14   0  0.20559
   4   8 -11    2.00    6.22   0  0.27278
   5  -1  12 1710.21   10.70   0  0.16116
   5  -1  13  152.96    7.81   0  0.15568
   5  -1  14   66.18    7.71   0  0.15405
   5  -1  15    5.14    7.58   0  0.15437
   5  -1  16 1057.54   10.02   0  0.15572
   5  -1  17  114.74    7.75   0  0.15878
   5  -1  18   58.87    7.75   0  0.16209
   5  -1  19    0.54    7.52   0  0.16545
   5  -1  20  453.58    8.49   0  0.17147
   5   0   4 1842.91   10.90   0  0.18714
   5   1   0  269.44    7.03   0  0.19923
   5   7 -10   34.98    6.15   0  0.26918
   6   0   6 3284.19   13.14   0  0.17721
   6   0   7    1.14    4.80   0  0.16826
   6   0  23    0.39    5.27   0  0.19629
   6   2  -2 1161.32   11.53   0  0.21879
   7   0   9    3.59    6.92   0  0.16290
   7   0  10 2099.48   11.76   0  0.15479
   7   0  11   -3.99    7.42   0  0.15482
   7   0  12   18.98    5.37   0  0.14999
   7   0  18  582.63    7.53   0  0.15930
   7   0  19    4.50    8.40   0  0.16273
   7   0  20  444.49    9.10   0  0.17047
   7   0  21    1.38    8.18   0  0.17641
   7   1   3   73.68    6.23   0  0.18712
   8   1   6  255.09    7.72   0  0.16637
   9   1  10    7.94    7.88   0  0.15168
   9   1  11    0.21    8.33   0  0.14743
   9   1  12  707.03   10.14   0  0.14420
   9   1  13   44.54    8.80   0  0.14404
   9   1  14  221.15    9.26   0  0.14325
   9   1  15   11.92    8.72   0  0.14547
   9   1  16  390.46    9.79   0  0.14844
   9   1  17   40.88    9.13   0  0.15120
   9   1  18  280.57    9.73   0  0.15467
   9   2   4  421.32    7.98   0  0.17190
   9   4  -2    5.87    5.31   0  0.21646
   9   5  -4    7.83    6.38   0  0.23635
  10   2   8  802.81   10.11   0  0.15155
  10   2   9  105.97    8.98   0  0.14508
  10   2  10   27.48    6.16   0  0.14271
  10   3   3   55.44    6.64   0  0.18567
  10   4   0  243.13    6.96   0  0.20888
  10   5  -2    2.78    6.76   0  0.22591
  11   3   7    0.37    8.42   0  0.15036
  11   3   8  208.38    9.76   0  0.14192
  11   4   3   89.77    7.16   0  0.18616
  11   5   0  230.68    8.55   0  0.21076
  12   4   7   -2.76    8.66   0  0.15447
  12   4   8  244.05   10.18   0  0.14692
  12   4   9   16.12   10.26   0  0.13887
  12   5   4    3.35    8.05   0  0.17435
 -14   2  10  473.17   13.07   0  0.15505
 -14   3   6  344.98    9.62   0  0.16764
 -14   4   3    0.84    8.33   0  0.17636
 -13   1  11   47.11    9.54   0  0.15451
 -13   3   3   -1.68    7.53   0  0.18114
 -13   4   1   43.41    7.46   0  0.18797
 -13   5  -1   62.35    7.46   0  0.19914
 -12   0  16  878.38   18.72   0  0.14944
 -12   1   8  457.71   11.16   0  0.16649
 -12   2   4  273.67    7.99   0  0.18009
 -12   3   1    5.88    7.08   0  0.18965
 -12   4  -1   16.58    6.76   0  0.19993
 -12   5  -2  142.06    7.00   0  0.20976
 -11   0  11    4.36    9.94   0  0.15794
 -11   2   2   29.38    6.67   0  0.18878
 -11   4  -2  137.27    6.49   0  0.21068
 -11   5  -4  618.75    7.59   0  0.21888
 -11   6  -5    3.19    6.26   0  0.22764
 -10   0   8 1267.90   13.22   0  0.16959
 -10   3  -2 1596.01    9.30   0  0.20701
 -10   4  -4  810.38    7.51   0  0.21745
 -10   5  -5    9.63    5.80   0  0.22901
 -10   6  -6   57.17    6.02   0  0.23706
 -10   7  -7   41.54    6.30   0  0.24178
  -9   0   6  171.90    8.64   0  0.17817
  -9   1   2 1229.43    9.37   0  0.19386
  -9   2  -1   60.83    6.11   0  0.20280
  -9   3  -3   82.54    5.80   0  0.21554
  -8   2  -2 1629.31    9.23   0  0.21106
  -7   0   3  -18.12    7.30   0  0.19006
  -7   2  -3  377.81    6.32   0  0.21663
  -7   4  -7  257.34    4.41   0  0.23642
  -7   7 -10   19.67    3.80   0  0.25679
  -6  -2  17   82.69   11.40   0  0.16396
  -6  -2  18  495.11   11.72   0  0.16929
  -6  -2  19    8.33    9.04   0  0.17616
  -6  -2  20   15.35    8.91   0  0.18243
  -6   0   2 1617.75   12.28   0  0.19608
  -6   2  -4  475.43    6.61   0  0.21823
  -6   3  -6 1562.85    8.42   0  0.22933
  -6   5  -9    5.25    3.67   0  0.24903
  -6   6 -10  574.22    5.09   0  0.25546
  -5  -2  14 1288.66   15.42   0  0.16433
  -5  -2  15  374.76   11.10   0  0.16290
  -5  -2  19  244.11    8.42   0  0.17840
  -5  -2  20 1093.03   11.25   0  0.18466
  -5  -2  21   24.05    7.29   0  0.18987
  -5  -2  22   11.21    8.66   0  0.19638
  -5   0   1    4.23    5.87   0  0.19688
  -5   1  -2 3500.27   13.38   0  0.21196
  -5   4  -8 2125.33    8.78   0  0.24568
  -4  -2  13  397.69   10.85   0  0.16503
  -4  -2  21   99.67    7.30   0  0.19133
  -4  -2  22  434.76    8.50   0  0.19654
  -4  -2  23   50.06    8.73   0  0.20303
  -4   2  -5  344.76    6.07   0  0.22739
  -4   3  -7  169.91    5.41   0  0.23632
  -4   5 -10  146.58    3.92   0  0.25458
  -3  -2  12 1681.25   14.89   0  0.16674
  -3  -2  21    1.60    6.99   0  0.19008
  -3  -2  22   82.97    7.21   0  0.19612
  -3  -2  23  109.03    8.56   0  0.20245
  -3   0   0 2104.20   15.42   0  0.19940
  -3   1  -3   47.13    5.86   0  0.21595
  -3   4  -9  286.80    5.61   0  0.24924
  -3   5 -10  760.49    6.52   0  0.25918
  -3   6 -11   13.84    4.87   0  0.26317
  -3   7 -12  332.45    4.57   0  0.26652
  -2  -2  12   31.82    6.68   0  0.16670
  -2  -2  13  703.42    9.72   0  0.16265
  -2  -2  20  238.32    7.67   0  0.18373
  -2  -2  21  160.32    7.30   0  0.18998
  -2  -2  22  181.01    7.22   0  0.19507
  -2   4  -9  481.16    6.01   0  0.25358
  -2   7 -12  841.43    6.96   0  0.26753
  -1  -2  12 2751.00   15.41   0  0.16620
  -1  -2  13   23.52    7.15   0  0.16390
  -1  -2  14   49.35    7.13   0  0.16142
  -1  -2  15  257.42    7.94   0  0.16098
  -1  -2  16 1764.90   12.09   0  0.16077
  -1  -2  17    1.42    7.19   0  0.16337
  -1  -2  18   94.22    7.27   0  0.16955
  -1  -2  19   95.30    7.14   0  0.17626
  -1  -2  20  514.53    8.27   0  0.18197
  -1  -2  21   17.02    6.97   0  0.18734
  -1   4  -9  109.88    5.01   0  0.25349
  -1   7 -12   66.65    5.12   0  0.27076
   0  -2  14  934.12    9.63   0  0.16352
   0  -2  15    6.30    6.83   0  0.16306
   0  -2  16  520.99    8.57   0  0.16250
   0  -2  17  149.50    7.51   0  0.16363
   0  -2  18  296.94    8.08   0  0.16599
   0  -2  19    0.32    6.96   0  0.17367
   0  -2  20  601.75    8.51   0  0.17997
   0   4  -9  532.13    6.35   0  0.25446
   0   7 -12 1066.06    7.50   0  0.27122
   1  -1   5  785.02   10.15   0  0.18355
   1  -1  26   76.36    4.82   0  0.22750
   1   4  -9  166.64    5.18   0  0.25380
   1   7 -12    2.26    4.92   0  0.26757
   2  -1   6  861.56    9.50   0  0.17873
   2  -1  24   11.75    4.78   0  0.21194
   2  -1  25    8.30    6.59   0  0.21902
   2   0   1   13.22    7.08   0  0.19573
   2   2  -5  395.87    9.63   0  0.22915
   2   3  -7   60.21    6.01   0  0.24271
   2   5 -10 1046.71    8.14   0  0.25998
   2   6 -11   63.55    5.06   0  0.26342
   2   8 -12   34.77    6.21   0  0.27362
   3  -1   8  452.64    8.16   0  0.16572
   3  -1  21   87.71    5.22   0  0.18762
   3  -1  22  124.81    7.05   0  0.19609
   3  -1  23    1.45    6.74   0  0.20139
   3  -1  24  303.99    7.49   0  0.20917
   3   0   2   18.09    6.53   0  0.18765
   4  -1  10  213.61    7.51   0  0.16288
   4  -1  11  322.35    8.00   0  0.15852
   4  -1  12 1187.62   10.14   0  0.15454
   4  -1  13    0.53    5.29   0  0.15338
   4  -1  14 1049.98    8.38   0  0.15211
   4  -1  15  107.84    5.73   0  0.15202
   4  -1  16  384.21    6.55   0  0.15539
   4  -1  17   38.38    5.46   0  0.15854
   4  -1  18  572.28    8.71   0  0.16244
   4  -1  19  145.50    7.58   0  0.17070
   4  -1  20   -2.74    7.34   0  0.17681
   4  -1  21    6.75    7.34   0  0.18403
   4   0   3   10.09    5.93   0  0.18692
   4   1  -1  385.96    9.40   0  0.20425
   4   5  -9   35.65    6.04   0  0.25507
   4   6 -10  396.67    7.44   0  0.26244
   5   0   5    4.76    6.34   0  0.17156
   5   2  -3  702.89   11.95   0  0.21927
   5   9 -11    3.86    6.70   0  0.27046
   6   0   8   13.13    6.88   0  0.15819
   6   0   9   54.15    5.23   0  0.15510
   6   0  19    4.34    5.78   0  0.16510
   6   0  20   78.10    5.70   0  0.17514
   6   0  21    2.83    7.57   0  0.18167
   6   0  22   99.86    7.79   0  0.18858
   6   1   2  299.68    7.07   0  0.18163
   7   0  13   -5.27    7.96   0  0.14733
   7   0  14 1466.71   11.20   0  0.14856
   7   0  15    3.18    8.30   0  0.14942
   7   0  16  146.17    8.49   0  0.15270
   7   0  17   -4.16    8.19   0  0.15539
   7   1   4  650.07    8.33   0  0.17578
   7   2   0 2174.50   12.55   0  0.19531
   7   3  -3    6.49    6.50   0  0.21947
   8   1   7  213.11    7.87   0  0.15995
   8   1   8  429.51    8.68   0  0.15065
   8   1   9    2.69    5.53   0  0.14691
   8   1  18  232.26    6.78   0  0.15559
   8   1  19   72.23    6.41   0  0.15955
   8   1  20  155.25    8.85   0  0.16949
   8   2   2 1250.40   10.03   0  0.18258
   8   3  -1    5.27    5.56   0  0.19929
   9   2   5   13.86    7.22   0  0.16291
   9   2   6  230.09    8.16   0  0.15224
   9   3   1   13.41    6.12   0  0.18961
  10   2  11    2.73    8.90   0  0.14043
  10   2  12  557.90   10.50   0  0.13924
  10   2  13   99.55    9.65   0  0.13826
  10   2  14  243.58   10.26   0  0.13836
  10   2  15  -10.28    9.79   0  0.14048
  10   2  16  218.81   10.39   0  0.14372
  10   3   4  282.81    7.92   0  0.16929
  10   3   5   16.18    7.69   0  0.15427
  10   4   1   33.32    6.44   0  0.19231
  11   3   9    0.62    9.61   0  0.13676
  11   3  10   29.33    9.75   0  0.13610
  11   3  11    4.65    9.88   0  0.13473
  11   3  12   51.93   10.46   0  0.13177
  11   3  13    3.68   10.67   0  0.13095
  11   4   4   90.22    7.80   0  0.17134
  11   4   5   63.23    8.33   0  0.15637
  11   5   1   56.86    8.26   0  0.19607
  11   6  -1    2.59    7.80   0  0.21214
  11   7  -2   32.65    8.01   0  0.21626
  12   5   5   12.85    8.41   0  0.16695
  12   5   6  151.69    9.57   0  0.15470
  12   6   2   21.81    9.26   0  0.18984
 -14   2   8  103.61    9.65   0  0.15743
 -14   2   9  149.62   11.98   0  0.15644
 -14   3   5    4.84    8.72   0  0.16711
 -13   1  10 1049.83   12.78   0  0.15529
 -13   2   5   17.38    7.93   0  0.17015
 -13   2   6   -0.83    9.80   0  0.16901
 -13   3   2  251.32    8.27   0  0.18098
 -13   4   0  167.00    7.88   0  0.18915
 -13   5  -2   38.88    7.48   0  0.19994
 -12   0  15    1.31   13.58   0  0.14868
 -12   1   7  164.11    8.47   0  0.16708
 -12   2   3   31.44    7.19   0  0.18036
 -12   3   0  368.23    7.83   0  0.19011
 -12   4  -2   87.76    6.90   0  0.20045
 -12   5  -3    9.28    6.74   0  0.21068
 -11   0  10   21.04    9.72   0  0.15912
 -11   1   5   68.74    8.73   0  0.17637
 -11   2   1  114.27    6.95   0  0.18874
 -11   3  -1    7.45    6.29   0  0.19980
 -11   4  -3  163.52    6.65   0  0.21075
 -11   5  -5  156.34    6.66   0  0.21879
 -11   6  -6  698.89    7.89   0  0.22761
 -10   0   7   11.00    7.17   0  0.16903
 -10   1   3  351.65    8.80   0  0.18557
 -10   2   0  477.44    7.31   0  0.19748
 -10   3  -3   76.79    6.40   0  0.20706
 -10   5  -6  315.80    6.63   0  0.22628
 -10   6  -7    7.97    6.02   0  0.23692
  -9   0   5   30.20    6.79   0  0.17470
  -9   1   1   61.99    6.25   0  0.19044
  -9   2  -2  153.23    6.44   0  0.20157
  -9   3  -4   25.18    5.76   0  0.21278
  -9   4  -6  367.42    4.95   0  0.22330
  -8  -1  10 2430.84   23.85   0  0.16715
  -8   0   4 2690.33   15.10   0  0.18332
  -8   1   0 2452.05   11.44   0  0.19814
  -8   2  -3  369.10    6.66   0  0.20717
  -7  -1   8  607.14   14.60   0  0.17272
  -7   1  -1  371.53    6.84   0  0.20322
  -7   2  -4 1631.62    8.07   0  0.21220
  -7   5  -9  286.70    4.59   0  0.24322
  -7   6 -10  983.46    6.10   0  0.24985
  -6   1  -2  364.19    6.73   0  0.20386
  -6   4  -8  796.69    6.79   0  0.24097
  -6   8 -12  280.79    4.84   0  0.26157
  -5  -2  16 1023.22   13.54   0  0.16205
  -5  -2  17   41.55    9.14   0  0.16465
  -5  -2  18  122.20    9.42   0  0.17157
  -5   2  -5   85.89    5.45   0  0.22204
  -5   3  -7   44.97    5.24   0  0.23211
  -5   5 -10  589.06    6.25   0  0.24941
  -4  -2  14  553.34   11.34   0  0.16264
  -4  -2  15   19.73    8.73   0  0.16219
  -4  -2  16    8.13    7.39   0  0.16058
  -4  -2  17  100.67    7.68   0  0.16547
  -4  -2  18  862.06   10.56   0  0.17188
  -4  -2  19    5.13    7.11   0  0.17791
  -4  -2  20   83.62    8.98   0  0.18481
  -4   1  -3  138.14    6.01   0  0.21162
  -4   4  -9  258.72    5.38   0  0.24706
  -4   7 -12  547.58    6.30   0  0.26361
  -3  -2  13   14.01    8.66   0  0.16320
  -3  -2  14  738.17   10.21   0  0.16253
  -3  -2  15  520.77    9.28   0  0.16061
  -3  -2  16 1672.50   12.89   0  0.15986
  -3  -2  17   -2.77    7.26   0  0.16472
  -3  -2  18    2.40    7.14   0  0.17179
  -3  -2  19  168.98    7.73   0  0.17771
  -3  -2  20 1607.99   12.57   0  0.18433
  -3   2  -6 1062.13    7.24   0  0.22207
  -3   3  -8  503.18    5.20   0  0.23522
  -2  -2  14  872.41   10.18   0  0.16229
  -2  -2  15   20.93    7.07   0  0.16185
  -2  -2  16   29.51    7.17   0  0.16144
  -2  -2  17  272.73    8.02   0  0.16333
  -2  -2  18  614.00    8.84   0  0.17037
  -2  -2  19   30.23    7.07   0  0.17702
  -2   2  -6 4717.11   14.85   0  0.22541
  -2   3  -8 2769.84   10.71   0  0.23726
  -2   5 -11  634.04    6.41   0  0.25420
  -2   8 -13   62.32    5.46   0  0.26969
  -1   2  -6 1526.11    9.89   0  0.22820
  -1   3  -8 1110.05    7.95   0  0.24079
  -1   5 -11   47.19    4.87   0  0.25445
  -1   6 -12  352.52    5.85   0  0.26038
  -1   8 -13   16.53    5.17   0  0.27162
   0  -1   5  296.09    8.92   0  0.17448
   0  -1  26  256.69    7.16   0  0.22880
   0   2  -6 1600.29   11.14   0  0.22211
   0   3  -8 1451.58    9.23   0  0.23622
   0   5 -11  977.67    7.46   0  0.25430
   0   6 -12  145.23    5.19   0  0.26021
   0   8 -13   51.70    5.24   0  0.27127
   1  -1   6  472.79    9.02   0  0.17008
   1  -1  24  644.86    6.43   0  0.21451
   1  -1  25   51.90    6.72   0  0.21965
   1   1  -3 1187.42   17.87   0  0.21081
   1   8 -13   16.87    5.19   0  0.26984
   2  -1   7  745.62    9.21   0  0.17063
   2  -1   8 4172.04   15.68   0  0.16265
   2  -1  22  585.43    8.00   0  0.19867
   2  -1  23   99.14    7.01   0  0.20387
   2   4  -9  598.49    7.26   0  0.24850
   2   7 -12  800.75    8.22   0  0.26712
   2   9 -13   16.75    5.55   0  0.26963
   3  -1   9  418.27    8.00   0  0.16311
   3  -1  10 1179.36   10.08   0  0.15627
   3  -1  11   84.63    5.47   0  0.15437
   3  -1  17  234.98    5.99   0  0.15853
   3  -1  18    4.52    5.23   0  0.16499
   3  -1  19    4.88    7.22   0  0.17313
   3  -1  20 1056.26    9.34   0  0.17928
   3   5 -10  554.21    7.22   0  0.24997
   3   6 -11   26.69    4.85   0  0.25896
   4   0   4  742.51    9.08   0  0.17215
   4   0  24  126.34    5.23   0  0.21229
   4   7 -11    4.23    6.09   0  0.26280
   4   9 -12   49.62    6.91   0  0.26878
   5   0   6 1096.72    9.55   0  0.16799
   5   0   7   18.21    4.91   0  0.15866
   5   0  21   -0.28    5.06   0  0.18650
   5   0  22  447.46    7.97   0  0.19489
   5   0  23    3.63    7.08   0  0.20153
   5   8 -11  145.19    7.21   0  0.26414
   6   0  10 1126.19   10.09   0  0.15238
   6   0  11   23.65    7.83   0  0.14679
   6   0  12  643.21    9.46   0  0.14473
   6   0  13   26.90    8.05   0  0.14473
   6   0  14  189.50    8.44   0  0.14661
   6   0  15   17.85    8.22   0  0.14912
   6   0  16  652.64    9.40   0  0.15283
   6   0  17    2.16    8.10   0  0.15565
   6   0  18   91.66    8.23   0  0.15976
   6   1   3  235.49    7.32   0  0.17130
   6   8 -10    6.04    7.47   0  0.26386
   7   1   5  480.78    8.11   0  0.16589
   7   1   6 1134.31   10.26   0  0.15545
   7   1  20  410.77    6.88   0  0.17419
   7   1  21   30.53    8.14   0  0.18248
   7   4  -5   19.20    7.96   0  0.23411
   8   1  10  455.86    9.17   0  0.14485
   8   1  11  180.93    8.28   0  0.14376
   8   1  12   -0.71    8.26   0  0.14140
   8   1  13    1.71    8.32   0  0.14115
   8   1  14  395.59    9.43   0  0.14321
   8   1  15  166.45    8.94   0  0.14606
   8   1  16   61.12    8.88   0  0.14893
   8   1  17   14.37    8.74   0  0.15211
   8   2   3  275.76    7.49   0  0.16987
   9   2   7  149.68    8.20   0  0.14862
   9   2   8  151.33    8.83   0  0.14047
   9   2   9   29.77    6.06   0  0.13832
   9   2  10  527.71    7.82   0  0.13695
   9   2  15   48.53    6.81   0  0.14144
   9   2  16  191.16    7.30   0  0.14448
   9   2  17    6.14    6.68   0  0.14754
   9   2  18  111.10    9.71   0  0.15113
   9   3   2  874.91    9.26   0  0.17644
   9   4  -1  121.51    6.43   0  0.19662
   9   6  -5   25.18    8.95   0  0.23276
  10   3   6 1486.12   12.07   0  0.14536
  10   3   7   -0.96    8.84   0  0.14081
  10   3   8    1.83    6.47   0  0.13553
  10   4   2  378.81    8.27   0  0.17279
  10   5  -1   92.59    7.97   0  0.20317
  10   6  -3    5.61    8.40   0  0.22006
  11   4   6  226.93    9.22   0  0.14972
  11   4   7  100.68    9.80   0  0.13652
  11   4   8   11.75    7.01   0  0.13083
  11   5   2  136.84    9.25   0  0.18184
  11   5   3   90.85    8.14   0  0.16679
  11   6   0  172.50    9.09   0  0.19693
 -14   1  13    6.04   12.99   0  0.14336
 -14   2   7    9.43    8.99   0  0.15905
 -14   3   3    3.10    8.61   0  0.17042
 -14   3   4  332.55   11.14   0  0.16995
 -13   1   9  122.76   11.44   0  0.15523
 -13   2   4  610.55    9.56   0  0.16929
 -13   3   1   19.94    7.75   0  0.18072
 -13   4  -1  151.21    7.81   0  0.18909
 -12   0  13    3.90   11.36   0  0.14830
 -12   0  14   81.32   13.71   0  0.14825
 -12   1   6    1.50    7.79   0  0.16517
 -12   2   2  771.81    9.22   0  0.17894
 -12   3  -1   16.82    5.09   0  0.18933
 -12   4  -3    0.74    4.84   0  0.19966
 -12   5  -4    5.32    6.84   0  0.20991
 -11   0   9    2.43    9.61   0  0.15890
 -11   1   4  133.04    8.83   0  0.17549
 -11   2   0  362.26    7.66   0  0.18744
 -11   3  -2  426.63    7.34   0  0.19867
 -11   4  -4  182.16    6.91   0  0.20892
 -11   5  -6    7.99    4.41   0  0.21763
 -11   6  -7    1.40    6.47   0  0.22623
 -10   1   2   42.44    6.64   0  0.18397
 -10   2  -1   83.80    6.52   0  0.19585
 -10   4  -5   80.15    6.13   0  0.21630
 -10   5  -7   32.03    6.11   0  0.22465
 -10   6  -8  108.72    6.40   0  0.23278
  -9   3  -5   12.57    4.04   0  0.21088
  -9   7 -10    8.05    4.28   0  0.24431
  -8   0   3   16.35    6.49   0  0.17873
  -8   1  -1  357.51    5.60   0  0.19337
  -8   3  -6 2105.69    8.58   0  0.21603
  -8   5  -9    1.74    3.95   0  0.23601
  -8   6 -10  182.72    4.59   0  0.24317
  -7   0   2  379.15    7.48   0  0.18552
  -7   1  -2 2442.34   10.47   0  0.19752
  -6   0   1   36.77    6.15   0  0.18937
  -6   2  -5  351.44    6.39   0  0.21459
  -6   3  -7   70.46    5.46   0  0.22638
  -6   4  -9   58.45    3.95   0  0.23475
  -5   1  -3   42.66    5.81   0  0.20480
  -4   0   0 2136.71   13.96   0  0.19387
  -4   2  -6 2599.49   10.76   0  0.21827
  -4   3  -8 1259.43    7.83   0  0.23128
  -4   5 -11  404.75    5.97   0  0.24772
  -4   7 -13   82.89    4.08   0  0.25881
  -3  -1  26    8.31    6.51   0  0.22963
  -3   4 -10   54.05    5.06   0  0.24147
  -3   7 -13   54.94    5.36   0  0.25974
  -2  -1  26  308.83    7.28   0  0.23040
  -2   1  -4 1183.70    9.46   0  0.20397
  -2   4 -10 1136.53    7.62   0  0.24544
  -2   7 -13   81.60    5.32   0  0.26407
  -1  -1  25   88.11    6.73   0  0.22363
  -1  -1  26   14.51    6.62   0  0.22900
  -1   4 -10  132.11    5.19   0  0.24627
  -1   7 -13  120.70    5.35   0  0.26407
   0  -1  23  141.12    5.13   0  0.20899
   0  -1  24   93.74    6.83   0  0.21600
   0  -1  25    0.43    6.64   0  0.22187
   0   4 -10 1602.66    8.99   0  0.24189
   0   7 -13   69.07    5.16   0  0.26405
   0   9 -14   91.22    5.88   0  0.26655
   1  -1   7  215.02    6.24   0  0.16126
   1  -1  21  193.92    5.41   0  0.19342
   1  -1  22   15.93    6.57   0  0.20043
   1  -1  23   53.56    6.74   0  0.20684
   1   3  -8 3098.31   13.66   0  0.23300
   1   5 -11   61.45    4.99   0  0.25295
   1   6 -12  244.66    5.51   0  0.25890
   1   7 -13  150.35    5.59   0  0.25959
   2  -1   9  590.96    9.27   0  0.15491
   2  -1  10  107.64    5.51   0  0.15317
   2  -1  18  822.82    7.49   0  0.16936
   2  -1  19  279.80    7.47   0  0.17754
   2  -1  20  215.08    7.39   0  0.18262
   2  -1  21    2.32    6.67   0  0.19057
   2   8 -13   14.45    5.31   0  0.26597
   3  -1  12 1318.01   10.50   0  0.15247
   3  -1  13  368.05    8.22   0  0.15134
   3  -1  14  271.12    8.04   0  0.15024
   3  -1  15    7.47    7.51   0  0.15164
   3  -1  16 1183.12   10.12   0  0.15493
   3   0   3   11.75    6.90   0  0.17149
   3   0  24  415.70    5.89   0  0.21526
   3   0  25    4.27    6.54   0  0.22093
   3   7 -12   94.23    6.37   0  0.26094
   3   9 -13   43.73    5.80   0  0.26560
   4   0   5   -2.72    6.77   0  0.16511
   4   0  21    2.27    4.87   0  0.19034
   4   0  22    9.07    6.88   0  0.19766
   4   0  23    5.08    6.86   0  0.20504
   4   4  -8  538.47    9.58   0  0.23604
   4   8 -12  108.54    6.89   0  0.26150
   5   0   8 1389.86   10.65   0  0.15160
   5   0   9    6.07    5.37   0  0.14730
   5   0  10 2765.59   12.25   0  0.14490
   5   0  16    5.46    5.55   0  0.15247
   5   0  17    6.69    5.60   0  0.15588
   5   0  18 1482.36   10.50   0  0.16559
   5   0  19    5.12    7.58   0  0.17100
   5   0  20  433.99    8.38   0  0.17892
   5   1   1  484.58    9.27   0  0.18117
   6   1   4 1717.81   11.62   0  0.15971
   6   1  21   40.04    5.45   0  0.18710
   6   1  22  191.42    7.76   0  0.19603
   6   2  -1  751.60   10.34   0  0.18923
   6   3  -4 1177.51   15.31   0  0.21485
   7   1   7  122.61    7.81   0  0.15122
   7   1   8 1946.42   12.22   0  0.14183
   7   1   9  554.12    7.42   0  0.13991
   7   1  10  267.12    6.63   0  0.13903
   7   1  15    2.01    6.02   0  0.14567
   7   1  16 1290.88    9.22   0  0.14917
   7   1  17  181.50    9.03   0  0.15240
   7   1  18  255.68    8.94   0  0.15809
   7   1  19    8.60    8.35   0  0.16540
   7   2   1  158.09    8.07   0  0.17568
   8   2   4  724.33    9.19   0  0.15840
   8   2   5  381.04    8.62   0  0.14739
   8   2  19    4.71    6.11   0  0.16394
   8   3   0  989.51   10.03   0  0.18278
   8   4  -3  197.32    8.01   0  0.20725
   9   2  11   86.01    9.13   0  0.13552
   9   2  12   -0.03    9.16   0  0.13492
   9   2  13   17.54    9.35   0  0.13589
   9   2  14  354.67   10.32   0  0.13854
   9   3   3   75.57    7.21   0  0.16068
   9   3   4   21.15    7.87   0  0.14535
   9   5  -3   16.28    7.22   0  0.20793
  10   3   9    1.34    9.66   0  0.13107
  10   3  10 1427.46   13.02   0  0.13096
  10   3  11   -8.05   10.02   0  0.12844
  10   3  12  130.00   10.56   0  0.12810
  10   3  13    4.32   10.34   0  0.13056
  10   3  14  557.57   11.70   0  0.13363
  10   3  15    9.22   10.42   0  0.13628
  10   4   3    8.38    7.58   0  0.15839
  10   5   0  437.50    8.63   0  0.18221
  10   7  -4  110.84   10.16   0  0.22328
  11   4   9   41.17   10.83   0  0.12599
  11   4  10  184.74   11.53   0  0.12494
  11   4  11   54.41   11.44   0  0.12358
  11   4  12   34.03   11.69   0  0.12266
  11   5   4  432.16    9.92   0  0.15654
  11   5   5  121.76    9.44   0  0.14595
  11   6   1    8.69    7.66   0  0.17909
  11   7  -1    3.94    8.65   0  0.19738
 -14   1  12  367.92   14.17   0  0.14397
 -14   2   6  494.10   10.39   0  0.15968
 -14   3   2  752.03   10.48   0  0.17125
 -13   1   8   49.88   11.01   0  0.15540
 -13   2   3   90.91    8.03   0  0.16949
 -13   3   0   67.72    7.74   0  0.18076
 -13   4  -2  258.54    8.10   0  0.19012
 -12   0  12 1042.44   17.17   0  0.14660
 -12   1   5   48.34    7.73   0  0.16669
 -12   2   1   53.82    7.44   0  0.17859
 -12   3  -2 1569.58    9.04   0  0.18892
 -12   4  -4 1067.24    7.76   0  0.19958
 -12   5  -5   35.90    6.93   0  0.20959
 -11   0   8 1523.86   13.54   0  0.15671
 -11   1   3   76.16    7.14   0  0.17522
 -11   2  -1  164.07    5.36   0  0.18691
 -11   3  -3   62.32    6.60   0  0.19755
 -11   4  -5  142.85    6.84   0  0.20687
 -11   5  -7   43.34    4.70   0  0.21715
 -10   0   6  665.74   11.25   0  0.16498
 -10   1   1   20.99    6.86   0  0.18002
 -10   2  -2 1261.57    9.12   0  0.19313
 -10   3  -4  570.52    7.45   0  0.20539
 -10   4  -6  142.73    6.25   0  0.21547
 -10   5  -8   14.17    4.43   0  0.22362
 -10   6  -9    9.86    6.33   0  0.23180
  -9  -1  12  447.32   17.03   0  0.15719
  -9  -1  23    5.16   10.47   0  0.20540
  -9   0   4 1805.91   12.49   0  0.17257
  -9   1   0  555.96    7.67   0  0.18885
  -9   2  -3  359.63    6.89   0  0.19974
  -9   5  -9  170.58    4.67   0  0.22951
  -8  -1   9   39.95   10.74   0  0.16093
  -8  -1  24  782.92   12.22   0  0.21304
  -8   2  -4  885.36    7.73   0  0.20514
  -7  -1  25  101.72    7.57   0  0.21906
  -7   2  -5  199.04    6.09   0  0.20652
  -6  -1   6 3733.22   26.88   0  0.16909
  -6   1  -3  343.72    6.70   0  0.19892
  -6   2  -6 1006.44    6.87   0  0.20971
  -6   3  -8  482.40    5.28   0  0.22059
  -5  -1  26   56.07    6.97   0  0.22828
  -5   0   0 2087.81   12.82   0  0.18866
  -5   2  -6   75.46    5.58   0  0.21550
  -4  -1  25   64.91    6.84   0  0.22362
  -4  -1  26  297.96    7.65   0  0.22919
  -4   1  -4 3229.49   13.26   0  0.20021
  -3  -1  25   99.03    6.78   0  0.22414
  -3   1  -4  108.40    6.14   0  0.20450
  -3   2  -7  867.19    6.79   0  0.21390
  -3   3  -9   54.42    5.16   0  0.23102
  -2  -1  24  472.72    7.76   0  0.21788
  -2  -1  25   23.27    6.58   0  0.22323
  -2   2  -7  124.67    4.50   0  0.21345
  -2   3  -9   -2.37    5.07   0  0.22716
  -2   5 -12 1653.97    8.48   0  0.24622
  -2   6 -13   65.12    5.33   0  0.25332
  -1  -1   5 1479.83   16.42   0  0.16680
  -1  -1  23   74.41    6.76   0  0.21072
  -1  -1  24  733.60    8.32   0  0.21624
  -1   1  -4  512.52    8.95   0  0.20334
  -1   3  -9    3.08    5.05   0  0.22975
  -1   5 -12  100.86    5.15   0  0.24613
  -1   6 -13   44.57    5.13   0  0.25272
   0  -1   6 3532.98   19.40   0  0.16089
   0  -1  21    8.41    4.71   0  0.19503
   0  -1  22  511.16    7.91   0  0.20201
   0   6 -13    8.85    4.93   0  0.25236
   1  -1   8    0.76    7.22   0  0.15434
   1  -1  18  249.90    5.85   0  0.17182
   1  -1  19    3.40    6.93   0  0.17755
   1  -1  20 1025.48    8.98   0  0.18525
   1   0  26  454.46    6.02   0  0.23126
   1   2  -6 2869.02   16.70   0  0.21409
   1   4 -10  827.24    7.52   0  0.24048
   1   8 -14   25.48    5.62   0  0.25999
   2  -1  11 1015.15   10.05   0  0.15156
   2  -1  12 3427.49   14.81   0  0.14723
   2  -1  13   39.99    7.81   0  0.14550
   2  -1  14  310.93    8.34   0  0.14747
   2  -1  15  265.98    8.07   0  0.15075
   2  -1  16  936.36    9.71   0  0.15443
   2  -1  17   23.32    7.51   0  0.16023
   2   0   2 1343.26   13.04   0  0.17137
   2   0  24  311.23    5.48   0  0.21718
   2   0  25    6.28    6.57   0  0.22275
   2   5 -11  494.00    6.71   0  0.24680
   2   6 -12  435.88    7.43   0  0.25343
   2   7 -13   41.96    5.40   0  0.25517
   2   9 -14   19.31    5.84   0  0.26112
   3   0  22 1154.72    7.67   0  0.20183
   3   0  23    3.84    6.85   0  0.20733
   3   3  -7   27.62    6.32   0  0.22387
   3   4  -9  209.37    7.24   0  0.23486
   4   0   6 2799.81   14.15   0  0.15378
   4   0   7   -0.25    5.22   0  0.15021
   4   0  18  290.93    5.92   0  0.16861
   4   0  19    6.65    7.10   0  0.17555
   4   0  20  457.39    7.96   0  0.18246
   4   1   0  584.16    9.80   0  0.17710
   5   0  11    2.43    7.81   0  0.14348
   5   0  12  413.67    8.90   0  0.14270
   5   0  13    7.83    8.11   0  0.14276
   5   0  14 2700.16   13.20   0  0.14624
   5   0  15   -2.58    8.03   0  0.14882
   5   1   2 3478.99   16.23   0  0.16495
   5   1  22  457.02    6.18   0  0.19907
   5   1  23    5.94    6.94   0  0.20574
   5   6 -10  236.14    8.46   0  0.24471
   5   7 -11   26.41    6.44   0  0.25050
   5   9 -12  391.99    8.95   0  0.25677
   6   1   5  178.41    7.68   0  0.14996
   6   1  18  512.70    6.94   0  0.16428
   6   1  19   83.79    7.86   0  0.17267
   6   1  20  111.13    8.02   0  0.17853
   6   9 -11    1.59    7.97   0  0.25234
   7   1  11   29.96    8.38   0  0.13816
   7   1  12 1684.31   11.83   0  0.13823
   7   1  13   86.87    8.69   0  0.14002
   7   1  14   25.42    8.30   0  0.14267
   7   2   2   76.17    6.94   0  0.16242
   7   2  21   -0.19    5.56   0  0.18630
   7   3  -2  986.56   11.48   0  0.19132
   8   2   6  395.18    9.02   0  0.14350
   8   2   7  281.05    9.24   0  0.13568
   8   2   8 1408.76   11.99   0  0.13363
   8   2   9  183.46    6.96   0  0.13243
   8   2  13  298.73    7.27   0  0.13544
   8   2  14  105.62    6.68   0  0.13834
   8   2  15    0.48    6.20   0  0.14120
   8   2  16 1039.00   11.07   0  0.14482
   8   2  17  160.14    9.43   0  0.14854
   8   2  18  508.06   10.03   0  0.15442
   8   3   1   11.34    7.09   0  0.16072
   8   5  -5   53.56    9.74   0  0.22390
   9   3   5    8.27    8.24   0  0.13860
   9   3   6  493.29   10.13   0  0.13304
   9   3  16  132.74    7.47   0  0.14037
   9   3  17   15.03    9.95   0  0.14369
   9   4   0  845.94   10.93   0  0.17894
  10   4   4  697.99   11.84   0  0.14802
  10   4   5   67.83    9.13   0  0.13652
  10   4   6  143.47   10.02   0  0.12842
  10   5   1    8.82    7.42   0  0.16561
  10   6  -2  349.57    9.72   0  0.19697
  11   5   6    8.73    9.61   0  0.13857
  11   5   7   27.84   10.42   0  0.12792
  11   5   8  454.54   12.88   0  0.12080
  11   5   9  107.53   12.22   0  0.11760
  11   5  10   53.18    9.16   0  0.11367
  11   6   2  475.30   10.05   0  0.16854
  11   7   0  109.44    8.37   0  0.18261
 -14   1  10   32.38   10.34   0  0.14487
 -14   1  11  217.20   13.51   0  0.14320
 -14   2   4  431.65   10.08   0  0.15971
 -14   2   5   86.46    9.24   0  0.15947
 -14   3   1   -2.51    8.49   0  0.17174
 -13   1   6 1267.23   12.52   0  0.15437
 -13   1   7   23.26   10.86   0  0.15489
 -13   2   2  142.02    8.25   0  0.16956
 -13   3  -1    0.08    7.44   0  0.18115
 -13   4  -3   90.80    7.80   0  0.19015
 -12   0  11    3.09   11.32   0  0.14449
 -12   1   4  815.67   10.06   0  0.16534
 -12   2   0  764.78    9.13   0  0.17766
 -12   3  -3    7.32    5.13   0  0.18752
 -12   4  -5   29.96    5.04   0  0.19836
 -12   5  -7   12.14    5.06   0  0.20825
 -12   5  -6  323.52    7.84   0  0.20856
 -11   0   7    0.37    8.24   0  0.15364
 -11   1   2 1190.48   10.08   0  0.17343
 -11   3  -4  160.66    6.95   0  0.19477
 -11   4  -6  346.04    7.45   0  0.20502
 -10   0   5    3.19    9.01   0  0.16335
 -10   1   0 1754.19   10.96   0  0.17853
 -10   2  -3  134.07    6.91   0  0.19059
 -10   3  -5   30.82    6.37   0  0.20376
 -10   4  -7   14.18    6.21   0  0.21178
 -10   6 -10    2.43    4.54   0  0.22968
  -9  -1  22  198.52   11.69   0  0.20029
  -9   0   3    9.42    7.04   0  0.16642
  -9   1  -1  252.70    7.11   0  0.18491
  -9   2  -4  732.03    7.80   0  0.19498
  -9   3  -6  552.62    7.06   0  0.20918
  -8  -1  23   87.18    9.37   0  0.20784
  -8   0   2 1412.20   10.93   0  0.17516
  -8   1  -2   68.18    6.37   0  0.19092
  -8   2  -5  469.51    6.99   0  0.19906
  -8   3  -7    9.42    5.69   0  0.21358
  -7  -1   7   94.53   10.61   0  0.16303
  -7  -1  24   12.02    7.09   0  0.21375
  -7   0   1   -1.28    6.13   0  0.17932
  -7   1  -3  154.92    6.42   0  0.19117
  -7   2  -6  126.36    4.54   0  0.20348
  -6  -1  24 1093.34   10.40   0  0.21586
  -6  -1  25    5.32    8.51   0  0.22131
  -6   0   0 1310.97   10.55   0  0.17991
  -5  -1   5 1255.00   18.85   0  0.16871
  -5  -1  24  193.08    7.38   0  0.21705
  -5  -1  25  169.63    8.73   0  0.22288
  -5   1  -4   84.25    6.06   0  0.19829
  -5   2  -7 1380.18    7.77   0  0.20788
  -4  -1  24  857.04    9.07   0  0.21790
  -4   0  -1   13.84    6.49   0  0.18210
  -4   2  -7  265.22    6.15   0  0.21226
  -4   3  -9    9.30    5.22   0  0.22568
  -4   7 -14  306.05    6.26   0  0.25399
  -4   8 -15   25.82    4.25   0  0.25596
  -3  -1  23   10.13    6.61   0  0.21130
  -3  -1  24  569.33    8.11   0  0.21748
  -3   0  -1   14.52    7.03   0  0.18283
  -3   4 -11  468.23    6.28   0  0.23549
  -2  -1  22  532.32    7.93   0  0.20492
  -2  -1  23  124.21    6.82   0  0.21064
  -2   0  -1   12.37    5.61   0  0.18098
  -2   4 -11   26.59    5.12   0  0.23795
  -1  -1  21  173.35    7.06   0  0.19754
  -1  -1  22  141.93    6.87   0  0.20326
  -1   2  -7  610.54    7.47   0  0.21197
  -1   4 -11  161.75    5.50   0  0.23498
   0  -1   7  370.65    9.50   0  0.15286
   0  -1  19  228.69    7.29   0  0.18219
   0  -1  20  787.26    8.64   0  0.18759
   0   0  26  130.52    6.70   0  0.23195
   0   1  -4 2169.45   16.82   0  0.19052
   0   3  -9    7.78    5.01   0  0.22399
   0   5 -12 1187.57    7.94   0  0.24522
   0   7 -14    4.62    5.09   0  0.25650
   1  -1   9 1135.28   10.95   0  0.15208
   1  -1  10 1739.53   12.52   0  0.14609
   1  -1  11  222.83    8.37   0  0.14487
   1  -1  12  400.51    7.06   0  0.14384
   1  -1  13  580.99    7.66   0  0.14470
   1  -1  14  901.94   10.22   0  0.14658
   1  -1  15    8.01    7.84   0  0.14953
   1  -1  16  807.67    9.46   0  0.15822
   1  -1  17  187.94    7.85   0  0.16358
   1   0   1    4.57    7.24   0  0.17085
   1   0  24  157.08    5.05   0  0.21859
   1   0  25   -2.06    6.46   0  0.22441
   1   5 -12    5.70    4.97   0  0.23891
   1   6 -13   50.29    5.22   0  0.24826
   2   0  22  286.49    5.51   0  0.20399
   2   0  23    5.85    6.42   0  0.20992
   2   3  -8  121.35    6.84   0  0.22039
   2   4 -10  415.47    6.86   0  0.22742
   2   8 -14  407.88    6.83   0  0.25666
   3   0   4 1406.61   12.06   0  0.16142
   3   0  19   -3.25    4.83   0  0.17918
   3   0  20  210.72    7.25   0  0.18804
   3   0  21   -5.52    6.88   0  0.19376
   3   1  25   29.28    4.82   0  0.22392
   3   6 -12  311.92    6.38   0  0.24418
   4   0   8  720.69    9.59   0  0.14240
   4   0   9   -0.39    7.87   0  0.13977
   4   0  10 4137.34   15.21   0  0.13781
   4   0  11   -3.10    5.80   0  0.13744
   4   0  12  252.93    6.65   0  0.13890
   4   0  13   -4.46    5.57   0  0.14162
   4   0  14 1208.99    8.97   0  0.14521
   4   0  15   -2.46    7.97   0  0.14852
   4   0  16  789.02    9.36   0  0.15379
   4   0  17   -5.71    7.48   0  0.16055
   4   1  23  102.68    6.95   0  0.20932
   4   1  24   81.36    7.11   0  0.21495
   4   6 -11    5.87    6.31   0  0.24463
   4   7 -12  551.14    8.71   0  0.24834
   4   9 -13    4.63    7.20   0  0.25477
   5   1   3   29.62    6.91   0  0.15378
   5   1  20  867.68    8.95   0  0.18518
   5   1  21   76.06    7.35   0  0.19056
   5   2  -2 4317.35   23.35   0  0.17943
   6   1   6    9.16    7.38   0  0.14462
   6   1   7  276.46    8.87   0  0.13796
   6   1   8 1175.25   10.98   0  0.13493
   6   1   9    6.68    5.72   0  0.13421
   6   1  12  321.45    7.01   0  0.13611
   6   1  13    7.18    6.06   0  0.13850
   6   1  14  843.65    8.27   0  0.14207
   6   1  15  252.88    8.87   0  0.14527
   6   1  16   20.77    8.39   0  0.14871
   6   1  17   -7.46    8.24   0  0.15552
   6   2   0   29.18    6.40   0  0.16934
   6   2  22  464.24    6.50   0  0.19918
   6   7 -10  905.54   13.51   0  0.24472
   7   2   3  345.65    8.34   0  0.15295
   7   2   4 1562.99   12.03   0  0.14192
   7   2  17    0.99    6.06   0  0.15330
   7   2  18  637.55    9.59   0  0.16377
   7   2  19  109.50    8.39   0  0.17036
   7   2  20  139.48    8.36   0  0.17789
   8   2  10   69.17    8.90   0  0.13117
   8   2  11   46.35    9.24   0  0.13038
   8   2  12 1482.77   12.29   0  0.13252
   8   3   2  982.13   10.92   0  0.14506
   8   3  19    4.73    6.04   0  0.16782
   8   4  -2 1019.45   11.70   0  0.18514
   9   3   7   37.99    9.23   0  0.13074
   9   3   8  302.96   10.22   0  0.12846
   9   3   9    2.83    9.56   0  0.12655
   9   3  10   53.99    9.97   0  0.12316
   9   3  11   22.15    9.80   0  0.12420
   9   3  12  531.53   11.11   0  0.12741
   9   3  13   17.19    9.73   0  0.12983
   9   3  14   30.24    9.94   0  0.13351
   9   3  15   20.13    9.90   0  0.13658
   9   4   1  175.66    9.37   0  0.16324
   9   5  -2  597.09   10.37   0  0.18732
   9   6  -4  544.34   11.11   0  0.20187
  10   4   7   17.38   10.07   0  0.12382
  10   4   8  988.93   13.16   0  0.12267
  10   4   9   35.25   10.84   0  0.12018
  10   4  10   28.59   11.10   0  0.11800
  10   4  11    1.35   10.92   0  0.11929
  10   4  12  709.05   12.80   0  0.12250
  10   4  13   26.36   11.14   0  0.12516
  10   4  14  278.54   11.77   0  0.12838
  10   5   2  108.54    8.37   0  0.15606
  10   6  -1   18.38    8.88   0  0.18258
  10   7  -3   93.73    8.83   0  0.19799
  11   6   3   11.34   10.76   0  0.15705
  11   6   4   29.77    9.53   0  0.14854
  11   6   5    5.03    9.99   0  0.13813
  11   7   1   -0.43    8.45   0  0.16856
 -14   1   8  491.47   11.68   0  0.14382
 -14   1   9   29.10   12.35   0  0.14430
 -14   2   3   22.42    8.71   0  0.15988
 -14   3   0   68.91    8.55   0  0.17289
 -13   1   5  110.08    9.01   0  0.15446
 -13   2   1   12.39    7.92   0  0.17108
 -13   3  -2   47.65    7.75   0  0.17981
 -13   4  -4   10.81    7.61   0  0.19053
 -12   0   9    0.29   11.25   0  0.14676
 -12   0  10  319.02   12.61   0  0.14544
 -12   1   3  117.79    7.97   0  0.16532
 -12   2  -1  132.46    7.75   0  0.17679
 -12   3  -4   77.22    5.31   0  0.18675
 -12   4  -6    1.03    5.14   0  0.19795
 -11   0   6  157.88    8.51   0  0.15419
 -11   1   1  115.03    7.28   0  0.17289
 -11   2  -2  370.84    7.58   0  0.18591
 -11   3  -5    1.85    6.71   0  0.19515
 -11   4  -7  148.81    7.00   0  0.20365
 -11   5  -8  574.77    7.85   0  0.21618
 -10   0   4 1072.39   10.95   0  0.16198
 -10   1  -1  296.50    5.88   0  0.17713
 -10   2  -4 1599.77    9.85   0  0.18905
 -10   3  -6 2323.84   10.52   0  0.20174
 -10   4  -8 1209.27    8.87   0  0.20896
 -10   5  -9    6.61    6.41   0  0.22221
  -9  -1  11    8.56   13.76   0  0.15341
  -9  -1  21  143.14   11.64   0  0.19453
  -9   0   2  314.50    8.10   0  0.16501
  -9   1  -2 1208.01    9.52   0  0.18158
  -9   2  -5   29.81    6.29   0  0.19293
  -9   3  -7   50.64    6.03   0  0.20706
  -9   4  -9   59.28    6.19   0  0.21469
  -8  -1   8  657.81   14.65   0  0.15486
  -8  -1  22  193.40    9.81   0  0.20183
  -8   0   1    3.35    6.68   0  0.17090
  -8   1  -3  311.17    7.21   0  0.18585
  -8   2  -6  510.14    5.87   0  0.19701
  -8   3  -8  196.40    6.30   0  0.20804
  -8   4 -10   37.36    4.28   0  0.21935
  -7  -1  23   25.11    8.70   0  0.20789
  -7   0   0 3557.99   15.36   0  0.17256
  -7   5 -12 1024.12    6.60   0  0.23197
  -6  -1  23  103.25    7.39   0  0.20959
  -6   1  -4 2051.60   10.59   0  0.19458
  -6   2  -7  264.04    6.57   0  0.20219
  -5  -1  23    5.61    6.85   0  0.21054
  -5   0  -1   23.23    6.15   0  0.17715
  -5   6 -14 1292.45    7.09   0  0.24282
  -4  -1  23  134.39    7.03   0  0.21101
  -4   1  -5  395.68    7.37   0  0.19179
  -4   3 -10 1580.90    7.77   0  0.21776
  -4   7 -15   49.92    4.22   0  0.24879
  -3  -1  22  457.57    7.72   0  0.20528
  -3   1  -5  503.80    7.83   0  0.19125
  -3   2  -8 2545.02   10.41   0  0.20510
  -3   3 -10 3274.54   11.56   0  0.21821
  -3   5 -13  210.26    5.80   0  0.23819
  -3   6 -14  930.62    7.44   0  0.24763
  -2  -1  21   10.41    6.48   0  0.19786
  -2   1  -5 1462.18   11.18   0  0.19026
  -2   3 -10  826.44    7.44   0  0.21820
  -2   5 -13    8.79    5.15   0  0.23951
  -2   6 -14 1368.51    8.25   0  0.24857
  -1  -1   6  748.13   12.49   0  0.15191
  -1  -1  19   -2.75    6.76   0  0.18277
  -1  -1  20  997.68    9.07   0  0.18967
  -1   0  26  826.39    8.27   0  0.23206
  -1   5 -13   11.03    5.27   0  0.23753
  -1   6 -14  494.65    6.49   0  0.24631
   0  -1   8 3762.93   18.69   0  0.14656
   0  -1  15  612.74    7.56   0  0.15218
   0  -1  16 2045.27   12.07   0  0.16049
   0  -1  17    6.39    7.07   0  0.16616
   0  -1  18  386.15    7.88   0  0.17426
   0   0  24  532.27    6.05   0  0.21929
   0   0  25   -0.51    6.37   0  0.22531
   0   2  -7  197.10    6.37   0  0.20489
   0   4 -11    8.28    6.11   0  0.23290
   0   6 -14 1610.72    9.07   0  0.24301
   1   0  22 1714.08    8.51   0  0.20529
   1   0  23    8.52    6.59   0  0.21175
   1   3  -9   29.31    5.47   0  0.21212
   1   8 -15  115.08    6.17   0  0.25110
   2   0   3  156.20    7.02   0  0.15598
   2   0  20  654.10    6.56   0  0.19000
   2   0  21   12.81    6.52   0  0.19663
   2   1  25    0.54    4.67   0  0.22520
   2   6 -13   44.81    5.36   0  0.24138
   2   7 -14  178.12    6.13   0  0.24445
   3   0   5    3.41    7.46   0  0.15148
   3   0   6  178.34    6.32   0  0.14403
   3   0  16  130.82    5.64   0  0.15752
   3   0  17    0.06    7.10   0  0.16466
   3   0  18 1711.35   10.31   0  0.17206
   3   1  23   13.09    4.81   0  0.21105
   3   1  24  584.60    7.75   0  0.21785
   3   5 -11    6.38    6.18   0  0.23591
   3   7 -13  284.59    7.60   0  0.24646
   3   8 -14  161.94    6.47   0  0.24689
   4   1   1  117.17    7.74   0  0.15842
   4   1  21    0.28    6.82   0  0.19517
   4   1  22  669.76    8.03   0  0.20192
   4   5 -10 1545.69   13.28   0  0.23326
   4   8 -13    9.93    6.88   0  0.24668
   5   1   4   69.93    7.54   0  0.14395
   5   1  17  246.52    6.11   0  0.16195
   5   1  18   51.93    7.59   0  0.16984
   5   1  19   -6.86    7.32   0  0.17710
   5   2  23   77.86    5.16   0  0.20869
   5   5  -9  211.13    9.53   0  0.23184
   5   8 -12  148.89    8.50   0  0.24676
   6   1  10  477.84    9.51   0  0.13356
   6   1  11  271.89    9.23   0  0.13357
   6   2   1   95.68    7.36   0  0.15224
   6   2  19   44.90    5.56   0  0.17597
   6   2  20  772.44    9.08   0  0.18466
   6   2  21  106.18    7.78   0  0.19098
   6   6  -9   46.79    9.72   0  0.22871
   6   8 -11   13.34    8.33   0  0.23848
   7   2   5  157.67    8.50   0  0.13685
   7   2   6  109.18    8.90   0  0.13039
   7   2   7  406.18    7.65   0  0.12881
   7   2  13    3.25    6.21   0  0.13445
   7   2  14 1096.61    9.16   0  0.13762
   7   2  15   81.18    8.84   0  0.14084
   7   2  16   29.02    8.88   0  0.14510
   7   3  -1    9.22    8.14   0  0.16677
   7   3  20  153.14    6.05   0  0.18186
   8   3   3   -0.87    7.96   0  0.13720
   8   3   4  872.83   11.21   0  0.13084
   8   3  15    6.51    6.90   0  0.13689
   8   3  16  521.13   10.49   0  0.14273
   8   3  17   -0.54    9.14   0  0.15100
   8   3  18  730.02   10.34   0  0.16002
   9   4   2   27.04    9.58   0  0.14720
   9   4   3   80.83    8.84   0  0.13390
   9   4  15  157.22    7.96   0  0.13232
   9   5  -1  200.79    8.15   0  0.16697
  10   5   3   31.75    8.82   0  0.14423
  10   5   4  261.73   10.30   0  0.13383
  10   5   5    6.25    9.83   0  0.12729
  10   6   0   14.07    7.75   0  0.16601
  11   6   6  587.60   12.77   0  0.13005
  11   6   7    3.74   11.54   0  0.12271
 -14   1   7  153.04   10.30   0  0.14556
 -14   2   2  257.99    9.51   0  0.16136
 -14   3  -1    1.67    8.27   0  0.17371
 -13   0  14  172.09   13.30   0  0.14617
 -13   0  15    2.86   14.02   0  0.15037
 -13   1   4  412.66    9.95   0  0.15570
 -13   2   0  282.09    8.77   0  0.17076
 -13   3  -3   10.48    7.68   0  0.18193
 -12   0   8  857.86   14.08   0  0.14376
 -12   1   2   69.37    7.76   0  0.16431
 -12   2  -2  332.41    8.36   0  0.17611
 -12   3  -5    9.69    5.23   0  0.18596
 -12   4  -7    3.42    5.26   0  0.19651
 -11   0   5    4.46    7.92   0  0.15370
 -11   1   0  654.65    8.87   0  0.17126
 -11   2  -3   98.97    6.97   0  0.18455
 -11   3  -6  147.60    7.28   0  0.19206
 -11   4  -8    6.04    6.75   0  0.20205
 -11   5 -10   62.12    5.03   0  0.21290
 -11   5  -9  129.80    6.95   0  0.21449
 -10   0   3    0.64    7.25   0  0.16099
 -10   2  -5  360.53    5.86   0  0.18721
 -10   3  -7    0.10    6.50   0  0.19693
 -10   4  -9   47.68    6.64   0  0.20683
 -10   5 -10  370.86    7.26   0  0.22049
  -9  -1  10  956.62   18.21   0  0.14931
  -9  -1  20  360.51   13.20   0  0.18915
  -9   1  -3  253.85    5.68   0  0.17969
  -9   2  -6  253.84    5.23   0  0.19070
  -9   3  -8  346.88    6.87   0  0.20170
  -9   4 -10  701.31    6.33   0  0.21225
  -8  -1  21   62.19    9.14   0  0.19633
  -8   0   0  693.87    7.69   0  0.16671
  -8   1  -4 1742.45    9.20   0  0.18352
  -8   3  -9   14.35    4.41   0  0.20565
  -7  -1   6 1029.67   15.88   0  0.15558
  -7  -1  22  463.48   10.55   0  0.20211
  -7   1  -4  764.90    8.03   0  0.18919
  -7   2  -7  443.52    6.93   0  0.20091
  -7   6 -14  922.14    6.90   0  0.23596
  -6  -1   5  570.50   12.85   0  0.15751
  -6  -1  22   25.49    7.02   0  0.20320
  -6   0  -1   83.36    6.58   0  0.17541
  -6   1  -5  198.04    6.59   0  0.18720
  -6   2  -8 1184.02    7.34   0  0.19961
  -6   4 -12 1241.79    6.97   0  0.22274
  -5  -1  22  638.97    8.92   0  0.20437
  -5   1  -5  584.24    7.70   0  0.19194
  -5   2  -8 2446.02   10.62   0  0.20117
  -4  -1  21   12.31    6.79   0  0.19876
  -4  -1  22   77.67    8.35   0  0.20505
  -4   2  -8  920.53    7.87   0  0.20543
  -4   4 -12 1442.46    8.22   0  0.22943
  -4   6 -15   53.43    4.21   0  0.24030
  -3  -1  20  288.39    7.51   0  0.19245
  -3  -1  21  114.39    6.94   0  0.19836
  -3   0  26  738.69    8.35   0  0.23168
  -3   6 -15    4.76    3.83   0  0.24055
  -2  -1   5  243.22   12.52   0  0.15486
  -2  -1  19  159.25    7.09   0  0.18515
  -2  -1  20 1201.49    9.56   0  0.19122
  -2   0  25   -0.55    6.46   0  0.22675
  -2   0  26  359.18    7.49   0  0.23202
  -2   2  -8   81.27    5.91   0  0.20428
  -2   4 -12  522.70    6.65   0  0.23000
  -2   6 -15   40.50    4.02   0  0.24042
  -1  -1  16  419.78    8.26   0  0.16251
  -1  -1  17  194.13    7.39   0  0.17003
  -1  -1  18  996.19    9.49   0  0.17600
  -1   0  24    6.80    6.49   0  0.21990
  -1   0  25   -0.30    6.56   0  0.22551
  -1   1  -5  890.71   10.57   0  0.18376
  -1   2  -8 2907.01   13.01   0  0.19688
  -1   3 -10 3390.44   12.47   0  0.21756
  -1   4 -12 1766.61    9.25   0  0.22711
  -1   8 -16  314.01    6.75   0  0.25219
   0  -1   9  628.46    9.87   0  0.14485
   0  -1  10 1134.13   11.25   0  0.14306
   0  -1  11  714.25   10.40   0  0.13950
   0  -1  12 3940.43   17.25   0  0.14037
   0  -1  13   25.81    7.84   0  0.14324
   0  -1  14    1.24    7.67   0  0.14549
   0   0  23    1.09    6.48   0  0.21369
   0   3 -10  112.81    5.89   0  0.21017
   0   5 -13    7.94    5.19   0  0.23636
   1   0  21   -1.25    6.51   0  0.19902
   1   4 -11   92.42    6.80   0  0.22514
   1   6 -14  102.34    5.70   0  0.23693
   2   0  18 1133.42    9.33   0  0.17626
   2   0  19    0.06    6.90   0  0.18266
   2   1  24    2.93    6.49   0  0.21823
   2   5 -12 1027.14    9.50   0  0.23169
   2   8 -15    7.77    5.79   0  0.24495
   3   0   7    3.05    7.96   0  0.13665
   3   0   8  768.63   10.40   0  0.13401
   3   0   9    2.35    5.78   0  0.13229
   3   0  10 2734.54   13.32   0  0.13158
   3   0  11    1.21    5.92   0  0.13389
   3   0  12  959.60    8.84   0  0.13713
   3   0  13    3.85    8.16   0  0.14110
   3   0  14 3134.11   14.07   0  0.14370
   3   0  15   -5.12    7.66   0  0.14988
   3   1  -1  409.81   11.89   0  0.16868
   3   1  22  143.10    6.99   0  0.20475
   4   1  18  743.96    7.09   0  0.17331
   4   1  19  257.73    7.59   0  0.18151
   4   1  20    3.61    6.94   0  0.18806
   5   1   5  506.55    9.37   0  0.14028
   5   1   6 3208.21   15.86   0  0.13147
   5   1   7   39.76    6.06   0  0.12975
   5   1  12 2521.71   12.05   0  0.13451
   5   1  13  247.26    6.79   0  0.13748
   5   1  14  180.60    8.60   0  0.14066
   5   1  15   12.12    8.25   0  0.14549
   5   1  16 1733.65   11.41   0  0.15323
   5   2  21    2.11    7.18   0  0.19478
   5   2  22  356.24    7.78   0  0.20115
   6   2   2 1574.95   12.87   0  0.14086
   6   2  17  263.73    6.30   0  0.16128
   6   2  18  225.05    8.36   0  0.16847
   6   3  -3  114.01    8.38   0  0.17900
   7   2   8 1393.23   12.23   0  0.12759
   7   2   9   59.76    9.00   0  0.12658
   7   2  10  683.85   10.67   0  0.12635
   7   2  11  142.61    9.15   0  0.12890
   7   2  12  233.61    9.33   0  0.13165
   7   3   0  840.69   10.80   0  0.14947
   7   3  18   27.10    5.92   0  0.16679
   7   3  19   14.50    8.06   0  0.17447
   7   4  -4  290.70   10.30   0  0.18998
   8   3   5   18.53    8.86   0  0.12814
   8   3   6 2169.24   14.48   0  0.12218
   8   3   7   13.06    9.40   0  0.12022
   8   3   8  174.81   10.15   0  0.11875
   8   3   9   10.92    9.78   0  0.11845
   8   3  10 2539.27   14.89   0  0.12086
   8   3  11    1.96    9.83   0  0.12404
   8   3  12   28.51    9.78   0  0.12631
   8   3  13   -0.36    9.84   0  0.12985
   8   3  14 1870.23   13.43   0  0.13361
   8   4  -1  110.07    8.94   0  0.16222
   8   5  -4  907.30   13.41   0  0.18942
   9   4   4  736.48   11.56   0  0.12609
   9   4   5  121.13    9.79   0  0.12239
   9   4   6  362.02   11.17   0  0.11628
   9   4   7  138.39   10.81   0  0.11465
   9   4   8  185.45   11.26   0  0.11304
   9   4   9   50.50   10.98   0  0.11354
   9   4  10  748.18   12.53   0  0.11591
   9   4  11  112.26   11.01   0  0.11856
   9   4  12   23.66   10.77   0  0.12144
   9   4  13   75.35   10.89   0  0.12526
   9   4  14  379.30   11.41   0  0.12893
   9   5   0  133.71    8.61   0  0.15001
   9   6  -3   22.74    8.50   0  0.17936
   9   7  -5   17.41    9.65   0  0.19827
  10   5   6  309.22   11.58   0  0.11843
  10   5   7   23.97   11.20   0  0.11470
  10   5   8   20.15   11.78   0  0.11065
  10   5   9    3.73   12.48   0  0.10910
  10   5  10  361.25   13.30   0  0.11153
  10   5  11   23.86   12.27   0  0.11405
  10   5  12   39.49   12.13   0  0.11689
  10   6   1    6.70    8.29   0  0.15434
  10   6   2  300.19   10.47   0  0.14144
  10   7  -2   14.29    9.47   0  0.17832
 -14   1   5   70.25   10.10   0  0.14386
 -14   1   6   39.95   12.07   0  0.14465
 -14   2   1   92.79    9.13   0  0.16117
 -13   0  11    3.35   12.73   0  0.13636
 -13   0  12 1457.51   20.12   0  0.13823
 -13   0  13    3.10   14.24   0  0.14262
 -13   0  16  712.30   20.15   0  0.15521
 -13   1   3   50.95    8.70   0  0.15498
 -13   2  -1   71.03    8.24   0  0.16979
 -13   3  -4  143.88    8.12   0  0.18026
 -12   0   6  579.98   11.32   0  0.14097
 -12   0   7   -1.96   11.02   0  0.14206
 -12   1   1   23.27    7.80   0  0.16291
 -12   2  -3   68.02    7.68   0  0.17649
 -12   3  -6 1668.95    9.38   0  0.18451
 -12   4  -8  683.70    7.33   0  0.19499
 -11   0   4 1732.81   13.28   0  0.15120
 -11   1  -1  296.07    8.20   0  0.16982
 -11   2  -4  339.14    7.64   0  0.18276
 -11   3  -7    2.85    7.12   0  0.18987
 -11   4  -9   42.87    7.03   0  0.20005
 -10   0   2 1134.17   10.88   0  0.15652
 -10   1  -2  151.07    7.19   0  0.17533
 -10   2  -6  352.29    5.94   0  0.18505
 -10   3  -8    7.48    6.42   0  0.19709
 -10   4 -10   22.69    6.71   0  0.20461
 -10   5 -11   22.87    6.66   0  0.21834
  -9  -1   9  653.86   15.51   0  0.14591
  -9  -1  19    9.37   12.26   0  0.18394
  -9   0   1   29.44    7.27   0  0.16305
  -9   3  -9   -3.85    6.25   0  0.20149
  -9   4 -11   88.99    4.84   0  0.21008
  -8  -1   7  796.43   15.10   0  0.15057
  -8  -1  20 1080.20   13.73   0  0.19066
  -8   2  -7  345.38    7.01   0  0.19482
  -8   5 -13   13.58    4.36   0  0.22297
  -7  -1  21  311.90   10.04   0  0.19638
  -7   0  -1    4.66    6.86   0  0.16955
  -7   1  -5  671.33    7.92   0  0.18501
  -7   2  -8 1560.57    9.31   0  0.19374
  -6  -1  21   14.58    8.67   0  0.19748
  -6   0  -2 2479.78   12.26   0  0.16890
  -6   5 -14  453.72    5.41   0  0.22766
  -5  -1   4  691.09   14.31   0  0.15435
  -5  -1  20   10.70    6.99   0  0.19205
  -5  -1  21  234.02    9.08   0  0.19855
  -5   0  -2   18.32    6.21   0  0.17366
  -5   0  26  361.25    7.92   0  0.23058
  -5   1  -6 3545.35   13.31   0  0.18415
  -5   2  -9  174.99    4.84   0  0.19714
  -5   4 -13   94.94    4.29   0  0.22083
  -4  -1  20 2071.68   12.09   0  0.19220
  -4   0  -2 2306.89   13.96   0  0.17427
  -4   0  26  700.61    8.36   0  0.23152
  -4   1  -6  318.56    7.16   0  0.18427
  -4   2  -9  544.06    6.02   0  0.19680
  -4   3 -11    6.01    5.57   0  0.21239
  -4   4 -13  120.51    4.33   0  0.22112
  -3  -1  19    0.14    6.68   0  0.18485
  -3   0  -2   35.94    7.48   0  0.17238
  -3   0  25   -4.86    6.45   0  0.22603
  -3   1  -6 1499.63   10.66   0  0.18288
  -3   2  -9   38.18    4.19   0  0.19653
  -3   3 -11   68.35    5.60   0  0.21444
  -2  -1  17   21.02    6.90   0  0.17129
  -2  -1  18   22.21    6.92   0  0.17758
  -2   0  24  387.67    7.38   0  0.21955
  -2   3 -11   45.89    5.63   0  0.21055
  -2   4 -13  483.67    5.50   0  0.22094
  -1  -1   7    0.81    9.82   0  0.14410
  -1  -1   8  972.24   12.81   0  0.13839
  -1  -1  13  887.73   10.90   0  0.14076
  -1  -1  14 1423.75   11.81   0  0.14874
  -1  -1  15    6.50    7.33   0  0.15413
  -1   0  -1    4.40   10.89   0  0.16840
  -1   0  23   -2.08    6.57   0  0.21340
  -1   5 -14  561.93    6.83   0  0.23170
  -1   7 -16  350.37    6.67   0  0.24443
   0   0  21   -2.03    6.54   0  0.19968
   0   0  22  821.54    8.33   0  0.20636
   0   1  26  412.77    7.31   0  0.23252
   0   2  -8  332.79    6.05   0  0.18916
   0   4 -12   17.78    5.24   0  0.22290
   0   6 -15   51.69    5.74   0  0.23372
   1   0  19    6.66    6.67   0  0.18472
   1   0  20   13.22    6.40   0  0.19181
   1   1  24  939.54    6.92   0  0.21896
   1   1  25   99.77    6.73   0  0.22526
   1   2  -7  495.93    8.78   0  0.19077
   1   5 -13   92.80    5.56   0  0.22971
   1   8 -16  570.08    7.90   0  0.24487
   2   0   4 2910.19   18.25   0  0.14525
   2   0  15   -2.50    5.22   0  0.15334
   2   0  16  252.91    7.58   0  0.16210
   2   0  17   16.56    7.03   0  0.16767
   2   1  22  803.23    6.76   0  0.20561
   2   1  23  159.46    6.98   0  0.21189
   2   2  -6  172.12    9.05   0  0.18648
   2   4 -11   65.83    5.68   0  0.21129
   3   1  20 1447.80    9.42   0  0.19121
   3   1  21  139.31    6.99   0  0.19719
   3   2  24   32.67    4.92   0  0.21856
   3   4 -10 2336.85   15.00   0  0.21197
   3   6 -13    5.48    5.38   0  0.22960
   3   7 -14  389.61    7.19   0  0.23672
   4   1   2  761.84   10.74   0  0.14794
   4   1  16  713.72    7.40   0  0.15896
   4   1  17   65.02    7.66   0  0.16617
   4   2  22  244.47    7.29   0  0.20384
   4   2  23    7.10    6.71   0  0.20994
   4   6 -12 1111.43   11.29   0  0.22580
   4   7 -13    4.13    6.91   0  0.23073
   5   1   8 1019.25   11.09   0  0.12892
   5   1   9  622.69   10.31   0  0.12823
   5   1  10  904.42   10.91   0  0.12883
   5   1  11   11.44    8.65   0  0.13148
   5   2  -1  474.35   11.02   0  0.15513
   5   2  19  190.35    7.81   0  0.18084
   5   2  20   36.22    7.32   0  0.18694
   5   7 -12  231.69    8.47   0  0.22731
   6   2   3  465.47    9.96   0  0.13336
   6   2   4  439.96    8.04   0  0.12680
   6   2  13  161.38    6.68   0  0.13303
   6   2  14   15.56    8.81   0  0.13625
   6   2  15    4.36    8.57   0  0.14446
   6   2  16 1655.18   11.53   0  0.15178
   6   3  20  486.28    8.67   0  0.18655
   6   3  21    0.19    7.63   0  0.19309
   7   3   1   10.67    7.94   0  0.13619
   7   3  15   69.17    6.35   0  0.14145
   7   3  16  407.65    9.32   0  0.15118
   7   3  17    5.59    8.40   0  0.15733
   8   4   0  157.29   10.10   0  0.14664
   8   4  15    5.93    7.02   0  0.13660
   8   4  16  651.94   10.94   0  0.14717
   8   4  17   13.69    9.39   0  0.15349
   8   6  -6  170.03   12.42   0  0.21018
   9   5   1   67.60    8.63   0  0.14123
   9   5  14   74.74   11.52   0  0.12389
   9   8  -6    2.62   11.51   0  0.20434
  10   6   3   16.55    9.66   0  0.13569
  10   6   4   72.70   10.83   0  0.12419
  10   6   5    2.44   10.79   0  0.12060
  10   6   6   75.39   12.06   0  0.11154
  10   6   7    8.11    8.79   0  0.10592
  10   6   8  110.76    9.72   0  0.10427
  10   6   9   10.93    9.60   0  0.10405
  10   7  -1    7.40   10.01   0  0.16430
  10   7   0  322.82   10.42   0  0.15261
 -14   1   4  267.62   10.56   0  0.14578
 -14   2  -1   48.25    9.15   0  0.15973
 -14   2   0  729.69   10.91   0  0.16061
 -13   0   9   11.85   12.75   0  0.13430
 -13   0  10   10.19   12.81   0  0.13405
 -13   1   1  190.76    9.15   0  0.15258
 -13   1   2  577.37   10.30   0  0.15394
 -13   2  -3   49.13    8.20   0  0.16748
 -13   2  -2  277.25    8.86   0  0.16880
 -13   3  -5   23.09    7.98   0  0.17907
 -12   0   5   -0.87    9.10   0  0.14045
 -12   1  -1   45.81    8.07   0  0.15994
 -12   1   0  410.70    9.00   0  0.16162
 -12   2  -4 1272.23   10.45   0  0.17555
 -12   3  -7    9.03    7.75   0  0.18296
 -12   4  -9   24.39    7.83   0  0.19302
 -11   0   3   -2.45    8.36   0  0.14496
 -11   1  -2  153.19    7.88   0  0.16842
 -11   2  -5   19.12    7.01   0  0.18095
 -11   3  -8  293.83    7.95   0  0.18784
 -11   4 -10  253.22    7.67   0  0.19774
 -10   0   1   -1.23    7.49   0  0.15429
 -10   1  -3  109.24    7.21   0  0.17332
 -10   2  -7   99.47    5.24   0  0.18258
 -10   3  -9   -1.46    6.70   0  0.19491
 -10   4 -11   -3.76    6.83   0  0.20479
 -10   5 -12   31.45    6.79   0  0.21626
  -9  -1   8  224.17   11.78   0  0.14204
  -9   0   0 2214.52   12.87   0  0.16067
  -9   1  -4 1421.20   10.04   0  0.17741
  -9   2  -7  237.63    6.79   0  0.18822
  -9   3 -10   66.06    4.93   0  0.19651
  -9   4 -12   16.20    4.71   0  0.20742
  -8  -1   6 2769.04   20.75   0  0.14530
  -8  -1  19  283.72   10.63   0  0.18437
  -8   0  -1    0.44    6.90   0  0.16437
  -8   1  -5  175.00    6.83   0  0.18098
  -8   2  -8 1626.66    9.50   0  0.19182
  -8   3 -10 2404.37   10.53   0  0.20284
  -8   5 -14  254.74    5.27   0  0.21985
  -7  -1   5 1046.16   14.81   0  0.14965
  -7  -1  20  166.93    9.51   0  0.19000
  -7   0  -2  490.32    8.41   0  0.16327
  -7   1  -6 1586.08    9.98   0  0.17872
  -7   2  -9   73.34    4.74   0  0.19055
  -7   4 -13   84.07    4.62   0  0.21311
  -6  -1   4  472.77   12.06   0  0.14957
  -6  -1  20 1907.44   14.21   0  0.19110
  -6   1  -6    1.68    6.28   0  0.18407
  -6   6 -16  181.77    4.97   0  0.23055
  -5  -1  19    3.80    7.12   0  0.18529
  -5   0  25    0.27    6.69   0  0.22371
  -4  -1   4   44.79   12.08   0  0.15519
  -4  -1  18  207.60    7.82   0  0.17952
  -4  -1  19  208.23    9.12   0  0.18576
  -4   0  25   -4.98    6.58   0  0.22459
  -4   3 -12  367.61    5.20   0  0.20553
  -3  -1  17  415.66    8.35   0  0.17250
  -3  -1  18 1222.43   11.37   0  0.17882
  -3   0  24   17.34    6.52   0  0.21931
  -3   3 -12   13.99    4.02   0  0.20557
  -2  -1  14  528.26    9.42   0  0.15022
  -2  -1  15  400.20    8.72   0  0.15771
  -2  -1  16 2091.81   12.69   0  0.16408
  -2   0  -2 1395.68   14.89   0  0.16418
  -2   0  23    0.84    6.58   0  0.21409
  -2   1  -6 1070.18   10.09   0  0.18140
  -2   2  -9 1130.37    8.95   0  0.19447
  -2   6 -16  106.48    6.08   0  0.23330
  -1  -1   9 1469.36   14.04   0  0.13664
  -1  -1  10 1404.46   13.40   0  0.13544
  -1  -1  11   33.86    8.14   0  0.13568
  -1  -1  12   10.16    8.16   0  0.13764
  -1   0  21   -6.89    6.63   0  0.20108
  -1   0  22 1601.05    9.85   0  0.20692
  -1   1  26   12.68    6.48   0  0.23136
  -1   2  -9   19.06    4.35   0  0.18670
  -1   3 -11   71.90    5.94   0  0.20451
  -1   4 -13   63.32    5.46   0  0.21970
   0   0  19    0.25    4.74   0  0.18626
   0   0  20  549.88    7.80   0  0.19316
   0   1  -5  317.54    9.32   0  0.16967
   0   1  24  148.07    5.04   0  0.21860
   0   1  25    4.08    6.48   0  0.22481
   0   8 -17   35.41    6.30   0  0.24321
   1   0   2  596.07   14.79   0  0.14237
   1   0  17   -4.90    6.93   0  0.17108
   1   0  18 1614.09   10.22   0  0.17802
   1   1  23   91.71    6.65   0  0.21222
   1   3 -10 3397.63   14.66   0  0.20104
   1   4 -12 2475.96   11.92   0  0.21442
   1   6 -15    0.14    5.57   0  0.22622
   1   7 -16   70.58    6.11   0  0.23202
   2   0   5   28.93    8.80   0  0.13693
   2   0   6 2162.40   15.72   0  0.12949
   2   0   7   26.58    6.51   0  0.12761
   2   0  11    5.06    6.08   0  0.13090
   2   0  12  227.70    8.73   0  0.13433
   2   0  13   17.71    8.05   0  0.13922
   2   0  14 2852.66   13.59   0  0.14631
   2   1  20  367.13    5.79   0  0.19209
   2   1  21    7.30    6.74   0  0.19862
   2   2  25  127.53    6.88   0  0.22595
   2   3  -9   65.07    7.22   0  0.19617
   2   5 -13   39.92    5.82   0  0.21514
   2   8 -16    3.02    5.92   0  0.23911
   3   1  18   10.57    6.86   0  0.17670
   3   1  19   -1.74    6.80   0  0.18373
   3   2  22  520.41    6.08   0  0.20446
   3   2  23   83.59    6.85   0  0.21133
   3   5 -12  157.09    7.30   0  0.21679
   3   8 -15  112.91    7.94   0  0.23567
   4   1   3  107.71    8.24   0  0.13747
   4   1   4 2944.56   16.00   0  0.12796
   4   1  13    0.14    6.13   0  0.13504
   4   1  14 1380.81   11.12   0  0.14432
   4   1  15  158.82    8.25   0  0.15080
   4   2  20 1468.47    9.61   0  0.19007
   4   2  21  205.78    7.32   0  0.19688
   4   4  -9  449.78   10.25   0  0.19917
   4   8 -14  161.81    8.14   0  0.23362
   5   2   0 3207.21   19.53   0  0.13822
   5   2  16   38.64    5.59   0  0.15809
   5   2  17   37.02    7.65   0  0.16636
   5   2  18  675.58    8.82   0  0.17302
   5   3  21    3.35    7.21   0  0.19628
   5   3  22   15.98    7.29   0  0.20286
   5   6 -11   47.31    8.06   0  0.21898
   5   8 -13    7.55    7.51   0  0.22660
   6   2   5  250.59    9.56   0  0.12433
   6   2   6  965.73   11.96   0  0.11870
   6   2   7  253.73   10.16   0  0.11746
   6   2   8 1130.18   12.17   0  0.11744
   6   2   9  288.25    9.86   0  0.11986
   6   2  10  202.60    9.47   0  0.12250
   6   2  11  183.01    9.47   0  0.12595
   6   2  12 1700.54   12.46   0  0.12993
   6   3  -2   73.23    8.18   0  0.14449
   6   3  17   13.00    5.57   0  0.16409
   6   3  18 1481.57   10.55   0  0.17201
   6   3  19    8.93    7.79   0  0.17892
   7   3   2 1756.40   14.21   0  0.12760
   7   3   3   87.80    9.12   0  0.12007
   7   3  11    2.92    6.91   0  0.12162
   7   3  12  670.53   11.12   0  0.12454
   7   3  13    5.53    9.42   0  0.12771
   7   3  14   84.35    9.41   0  0.13275
   7   4  -3  103.02    9.19   0  0.15992
   7   4  18  399.32    9.02   0  0.16934
   7   4  19  166.93    8.56   0  0.17652
   7   5  -6  451.80   14.59   0  0.19178
   8   4   1   25.86   10.66   0  0.13018
   8   4   2 1285.40   13.55   0  0.11950
   8   4   3   26.62    9.58   0  0.11521
   8   4  11    7.77    7.31   0  0.11742
   8   4  12 1479.14   13.71   0  0.12032
   8   4  13   66.15   10.42   0  0.12369
   8   4  14  174.35   10.62   0  0.12867
   8   5  -3  107.34    9.31   0  0.16239
   9   5   2  692.38   13.34   0  0.12854
   9   5   3  218.15   10.63   0  0.12036
   9   5   4  596.15   12.78   0  0.11021
   9   5   5  181.21   11.88   0  0.10598
   9   5   6  199.35    9.09   0  0.10271
   9   5   7  119.27    9.03   0  0.10177
   9   5   8  898.25   11.68   0  0.10400
   9   5   9  200.92   12.64   0  0.10647
   9   5  10   22.34   12.02   0  0.10935
   9   5  11   33.54   11.69   0  0.11246
   9   5  12  905.82   13.76   0  0.11694
   9   5  13  111.83   11.73   0  0.12045
   9   6  -2  116.30   10.17   0  0.15776
   9   7  -4    5.58    9.11   0  0.17262
  10   7   1   45.17    9.65   0  0.14398
  10   7   2   29.86   10.23   0  0.13265
 -15   1   5   88.21   11.58   0  0.13392
 -14   1   2  264.21   10.45   0  0.14395
 -14   1   3  107.72    9.88   0  0.14512
 -14   2  -2   -1.47    8.95   0  0.16079
 -13   0   7    2.24   10.13   0  0.13352
 -13   0   8 1426.49   17.48   0  0.13274
 -13   1   0 1006.24   11.51   0  0.15283
 -13   2  -4   23.62    8.15   0  0.16670
 -13   3  -7   -2.65    5.84   0  0.17632
 -13   3  -6   25.11    8.02   0  0.17765
 -12   0   4   25.09    9.04   0  0.14101
 -12   1  -2  348.27    8.98   0  0.15873
 -12   2  -5  274.14    8.45   0  0.17497
 -12   3  -8   76.50    7.96   0  0.18154
 -11   0   1    6.06    8.19   0  0.14824
 -11   0   2  876.80   10.85   0  0.14809
 -11   1  -3  255.16    8.30   0  0.16739
 -11   2  -7   77.78    5.49   0  0.17738
 -11   2  -6  459.27    8.22   0  0.17941
 -11   3  -9    0.81    7.16   0  0.18881
 -11   4 -11   95.13    7.64   0  0.19601
 -10   0   0    9.85    7.65   0  0.15292
 -10   1  -4  723.32    8.94   0  0.17168
 -10   2  -8 1477.21    8.71   0  0.18077
 -10   3 -10 2027.69   11.04   0  0.19075
 -10   4 -12  765.96    7.16   0  0.20052
  -9  -1   7  105.00   10.96   0  0.13944
  -9  -1  18   26.74   12.49   0  0.17797
  -9   0  -1    5.36    7.23   0  0.15894
  -9   1  -5  252.93    7.49   0  0.17553
  -9   2  -8  263.04    7.07   0  0.18640
  -9   3 -11   33.66    4.88   0  0.19467
  -9   4 -13   63.93    4.94   0  0.20546
  -8  -1   5   31.41   10.34   0  0.14259
  -8   0  -2 2432.80   12.83   0  0.16157
  -8   1  -6  196.52    7.15   0  0.17728
  -8   2  -9  204.75    7.00   0  0.18593
  -8   3 -11    2.26    6.39   0  0.19998
  -8   5 -15   34.45    4.66   0  0.21752
  -7  -1   4  322.46   11.43   0  0.14506
  -7  -1  19   44.56    9.14   0  0.18397
  -7   0  -3    0.17    6.89   0  0.16367
  -7   0  25   -1.92    6.92   0  0.22273
  -7   1  -7  192.71    5.34   0  0.17661
  -7   3 -12  530.76    5.98   0  0.19845
  -7   4 -14  616.56    6.10   0  0.21080
  -6  -1  19  170.85    9.43   0  0.18513
  -6   0  -3   -3.24    6.64   0  0.16407
  -6   0  25    0.10    8.37   0  0.22404
  -6   1  -7  382.87    7.55   0  0.17818
  -5  -1  18 1021.71   10.77   0  0.17917
  -5   0  -3   28.27    6.68   0  0.16710
  -5   0  24   95.97    7.09   0  0.21746
  -5   1  -7   40.21    6.44   0  0.18094
  -5   6 -17    0.63    4.39   0  0.22832
  -4  -1  17   28.11    7.34   0  0.17253
  -4   0  -3    8.31    6.88   0  0.16519
  -4   0  24  203.99    7.02   0  0.21877
  -4   1  -7  531.81    7.90   0  0.18040
  -4   5 -16  183.53    4.79   0  0.22217
  -3  -1  15   -0.84    7.33   0  0.15791
  -3  -1  16    2.81    7.27   0  0.16474
  -3   0  -3   19.13    7.70   0  0.15983
  -3   0  23    1.57    6.52   0  0.21242
  -3   1  -7  106.78    6.80   0  0.17868
  -3   2 -10   43.89    6.08   0  0.18772
  -3   5 -16  863.34    6.75   0  0.22203
  -3   7 -18    2.69    4.41   0  0.23358
  -2  -1   6 3849.34   29.90   0  0.13828
  -2  -1  12 2537.04   16.14   0  0.13685
  -2  -1  13   30.73    7.75   0  0.14306
  -2   0  21    2.40    4.65   0  0.20040
  -2   0  22 1495.92    9.74   0  0.20684
  -2   1  26  410.65    7.51   0  0.23151
  -2   2 -10 3303.01   12.40   0  0.18533
  -2   3 -12 1185.86    8.62   0  0.20541
  -2   4 -14  515.24    6.94   0  0.21367
  -2   6 -17   24.38    4.36   0  0.22778
  -1   0  20  149.92    7.09   0  0.19389
  -1   1  -6  455.40    8.80   0  0.17475
  -1   1  25  103.85    6.76   0  0.22571
  -1   3 -12  235.02    5.15   0  0.19792
   0   0  18 2090.36   10.97   0  0.18006
   0   1  23  177.21    7.01   0  0.21190
   0   3 -11    3.70    5.65   0  0.19960
   0   4 -13  875.12    8.09   0  0.21303
   0   6 -16    7.46    5.52   0  0.22933
   0   7 -17   29.23    6.01   0  0.23030
   1   0  14 1672.29   10.20   0  0.15000
   1   0  15   -5.40    7.23   0  0.15696
   1   0  16  272.80    7.82   0  0.16386
   1   1  -4  672.83   13.90   0  0.16431
   1   1  21  257.14    5.44   0  0.19929
   1   1  22   26.76    6.58   0  0.20624
   1   2  25   42.68    6.66   0  0.22519
   1   5 -14  853.99    8.11   0  0.21957
   1   8 -17   15.54    6.27   0  0.23645
   2   0   8 3570.58   18.01   0  0.12572
   2   0   9   18.59    8.99   0  0.12523
   2   0  10 5289.03   19.65   0  0.12837
   2   1  19  352.68    7.50   0  0.18550
   2   2  23    7.18    4.74   0  0.21231
   2   2  24  767.13    8.27   0  0.21924
   3   1   0  861.55   13.88   0  0.14512
   3   1  15   14.47    5.40   0  0.15501
   3   1  16 1415.78   10.18   0  0.16270
   3   1  17  335.46    7.78   0  0.16898
   3   2  21   38.58    6.81   0  0.19775
   3   3  24  192.15    5.29   0  0.21937
   3   7 -15    7.28    6.01   0  0.22210
   4   1   5  349.46   10.07   0  0.12505
   4   1   6  290.74   10.22   0  0.11926
   4   1   7  492.39   10.68   0  0.11833
   4   1   8 2835.60   15.85   0  0.11929
   4   1   9  164.53    9.39   0  0.12179
   4   1  10  185.75    9.47   0  0.12452
   4   1  11  559.94   10.13   0  0.12888
   4   1  12 1812.40   12.65   0  0.13204
   4   2  -3  385.16   13.91   0  0.15511
   4   2  18   15.04    5.18   0  0.17607
   4   2  19   38.05    7.23   0  0.18294
   4   3  22  722.98    6.70   0  0.20529
   4   3  23   -2.33    6.84   0  0.21201
   4   5 -11  366.18    9.82   0  0.21012
   5   2  14  762.90    9.99   0  0.14281
   5   2  15  284.38    8.67   0  0.14971
   5   3  19   27.50    5.34   0  0.18189
   5   3  20  290.96    7.86   0  0.18844
   6   3  15   27.92    6.01   0  0.14805
   6   3  16  148.78    8.39   0  0.15665
   6   4  19    9.92    5.53   0  0.18020
   6   4  20  478.09    8.59   0  0.18858
   7   3   4  173.23    9.54   0  0.11816
   7   3   5    7.77    9.20   0  0.11593
   7   3   6 1447.44   13.85   0  0.11236
   7   3   7   32.46   10.30   0  0.11034
   7   3   8   68.48   10.24   0  0.11263
   7   3   9    4.60    9.95   0  0.11642
   7   3  10  942.29   12.10   0  0.11891
   7   4  15  177.22    7.05   0  0.14492
   7   4  16    7.69    8.71   0  0.15390
   7   4  17   24.70    8.48   0  0.16110
   8   4   4  595.93   11.88   0  0.11322
   8   4   5  133.55   10.68   0  0.10928
   8   4   6  324.39   11.88   0  0.10538
   8   4   7   15.66   11.13   0  0.10534
   8   4   8 1596.95   14.83   0  0.10819
   8   4   9  118.21   10.90   0  0.11157
   8   4  10   64.13   10.64   0  0.11460
   8   5  -2  206.01   10.31   0  0.14722
   8   5  14  315.54    8.32   0  0.13107
   8   5  15   27.99    9.87   0  0.14125
   8   5  16   86.11    9.85   0  0.14821
   8   6  -5    8.14   10.30   0  0.17040
   9   6  -1   29.46   10.59   0  0.14535
   9   6   0  807.55   12.30   0  0.13407
   9   6  12   78.76   13.03   0  0.11133
  10   7   3   52.06   13.53   0  0.12709
  10   7   4  168.28   12.14   0  0.12087
  10   7   5   76.16   12.56   0  0.11470
  10   7   6   82.43   13.27   0  0.10811
 -15   1   3   30.80   11.17   0  0.13490
 -14   0  10  316.90   12.92   0  0.12969
 -14   0  11    4.23   13.61   0  0.13283
 -14   0  12  330.70   15.34   0  0.13713
 -14   1   1   49.36    9.60   0  0.14524
 -14   2  -4  523.57    8.27   0  0.15988
 -14   2  -3   39.59    8.99   0  0.16090
 -13   0   5   10.62   10.46   0  0.13152
 -13   0   6  648.60   14.53   0  0.13142
 -13   1  -1  144.32    9.15   0  0.15365
 -13   2  -5   50.54    8.55   0  0.16551
 -12   0   2  731.84   11.40   0  0.13775
 -12   0   3    0.97   10.76   0  0.14236
 -12   1  -3   17.24    8.36   0  0.15673
 -12   2  -7   45.44    5.64   0  0.17144
 -12   2  -6   21.63    7.74   0  0.17294
 -12   3  -9   -1.17    7.91   0  0.18168
 -11   0   0 1178.66   11.62   0  0.14431
 -11   1  -4 1688.10   11.35   0  0.16536
 -11   2  -8   25.34    5.40   0  0.17508
 -11   3 -10   30.49    7.33   0  0.18636
 -11   4 -12   37.78    7.65   0  0.19368
 -10  -1   8  994.21   16.55   0  0.13258
 -10  -1   9    4.21   13.09   0  0.13459
 -10  -1  10 1544.73   22.54   0  0.13516
 -10  -1  11  523.50   18.15   0  0.13719
 -10  -1  12  111.12   16.54   0  0.14176
 -10   0  -1   -1.37    7.81   0  0.15036
 -10   1  -5  250.29    7.87   0  0.16936
 -10   2  -9  181.67    5.68   0  0.17825
 -10   3 -11    0.91    7.16   0  0.18821
 -10   4 -13   27.15    5.30   0  0.19847
  -9  -1   5  323.91   10.37   0  0.13452
  -9  -1   6 1209.85   15.71   0  0.13669
  -9   0  -2 1947.93   12.30   0  0.15620
  -9   1  -6  348.39    7.71   0  0.17293
  -9   2  -9   52.89    6.74   0  0.18403
  -9   3 -12  579.43    6.55   0  0.19195
  -8  -1   4 1059.11   14.43   0  0.13989
  -8  -1  18 1465.59   16.88   0  0.17848
  -8   0  -3   -3.23    7.32   0  0.15781
  -8   0  24    1.82    7.11   0  0.21670
  -8   1  -7  375.20    7.68   0  0.17157
  -8   2 -10   81.56    6.86   0  0.18275
  -8   3 -12   27.27    6.60   0  0.19747
  -7  -1   3   62.14    8.43   0  0.14179
  -7  -1  18  160.87    9.74   0  0.17797
  -7   0  -4 2587.43   12.05   0  0.15867
  -7   0  24  162.64    7.47   0  0.21698
  -7   2 -10  729.54    8.07   0  0.18814
  -7   3 -13   10.43    4.63   0  0.19558
  -6  -1   3  572.71   12.60   0  0.14257
  -6  -1  18  799.86   11.56   0  0.17917
  -6   0  -4  170.42    7.59   0  0.15876
  -6   0  24   68.15    6.99   0  0.21748
  -6   1  -8 1301.93    8.45   0  0.17331
  -6   2 -11  162.34    5.16   0  0.18572
  -6   4 -15    2.79    4.34   0  0.20848
  -5  -1   3   95.15   10.30   0  0.14267
  -5  -1  17 1561.10   12.58   0  0.17302
  -5   0  -4 2451.00   13.37   0  0.15956
  -5   0  23    4.42    6.60   0  0.21173
  -5   1  -8 1170.50    9.52   0  0.17276
  -4  -1  16 2549.38   14.86   0  0.16620
  -4   0  -4  935.91   10.37   0  0.15789
  -4   0  23    0.22    6.63   0  0.20981
  -4   1  -8 3078.15   13.24   0  0.17232
  -3  -1  14 1469.01   12.64   0  0.15174
  -3   0  21   -1.07    6.48   0  0.20083
  -3   0  22  730.11    8.43   0  0.20649
  -3   1  -8  482.98    6.63   0  0.17116
  -3   1  26   16.40    6.62   0  0.23097
  -3   2 -11  833.90    7.10   0  0.18332
  -3   3 -13   23.54    5.99   0  0.19848
  -2  -1   7  302.01   13.15   0  0.13108
  -2  -1   8 2082.18   18.89   0  0.12941
  -2  -1   9  142.58    9.67   0  0.12757
  -2  -1  10 2657.68   18.42   0  0.12945
  -2  -1  11  288.69   11.44   0  0.13130
  -2   0  20  285.32    7.30   0  0.19363
  -2   1  -7  897.12    9.66   0  0.17294
  -2   1  25   39.08    6.72   0  0.22524
  -2   3 -13  111.91    4.78   0  0.19583
  -1   0  18  691.21    8.42   0  0.18064
  -1   0  19    5.19    6.46   0  0.18758
  -1   1  23   95.54    6.82   0  0.21141
  -1   1  24  905.33    8.36   0  0.21855
  -1   2 -10  538.79    8.10   0  0.17782
  -1   6 -17    9.67    5.86   0  0.22528
   0   0  16   12.99    7.12   0  0.16600
   0   0  17   -0.97    6.98   0  0.17298
   0   1  22  702.05    7.80   0  0.20554
   0   2  -9 1210.55   10.38   0  0.17919
   0   2  25  135.27    6.86   0  0.22420
   0   2  26   97.29    6.73   0  0.23115
   0   4 -14 1045.34    7.64   0  0.20297
   1   0   3    3.06   10.98   0  0.12789
   1   0  12  237.74    8.94   0  0.13616
   1   0  13    2.26    7.83   0  0.14286
   1   1  20 1263.03    9.28   0  0.19271
   1   2  -8 1758.47   13.49   0  0.17396
   1   2  24    9.31    6.57   0  0.21888
   1   3 -11   81.89    6.23   0  0.18916
   1   4 -13   28.26    5.91   0  0.20360
   1   6 -16  342.51    6.99   0  0.22021
   1   7 -17  115.02    6.60   0  0.22557
   2   1  17   35.66    7.00   0  0.17150
   2   1  18  975.81    8.74   0  0.17822
   2   2  22   53.44    6.79   0  0.20503
   2   4 -12   44.53    6.01   0  0.19986
   2   5 -14  169.22    6.69   0  0.20473
   2   8 -17   49.94    6.61   0  0.22730
   3   1   1  690.27   13.23   0  0.12821
   3   1  13  524.67    7.45   0  0.14063
   3   1  14  407.05    8.76   0  0.14827
   3   2  19  143.15    5.25   0  0.18437
   3   2  20   22.39    6.79   0  0.19116
   3   3  23    2.92    6.68   0  0.21177
   3   4 -11  597.95    9.22   0  0.19129
   3   6 -14   23.33    7.21   0  0.21558
   3   8 -16  384.11    9.42   0  0.22604
   4   2  16 1168.79    8.37   0  0.16186
   4   2  17  126.85    7.58   0  0.16823
   4   3  20  342.62    5.93   0  0.19012
   4   3  21   -5.36    7.06   0  0.19773
   4   6 -13   61.77    7.52   0  0.20838
   4   7 -14  430.14    9.38   0  0.21638
   4   8 -15   -0.61    8.06   0  0.21514
   5   2   1  253.64   11.45   0  0.12774
   5   2   2  929.99   12.86   0  0.11788
   5   2  10  412.20    8.04   0  0.11982
   5   2  11  499.00   10.37   0  0.12272
   5   2  12  924.49   11.28   0  0.12634
   5   2  13   33.14    8.86   0  0.13393
   5   3  17   40.05    5.51   0  0.16742
   5   3  18   62.17    7.84   0  0.17456
   5   4  21   -3.09    7.38   0  0.19856
   6   3  -1   48.31   10.44   0  0.13066
   6   3  13   44.53    9.07   0  0.13209
   6   3  14 2513.32   13.41   0  0.13936
   6   4  18  229.87    8.33   0  0.17321
   6   8 -12  118.09   11.12   0  0.21294
   7   4  -2  729.82   13.20   0  0.13715
   7   4  13  110.72   10.16   0  0.12867
   7   4  14  825.33   11.17   0  0.13618
   7   5  17  172.74    9.17   0  0.16306
   8   5  -1   18.51   10.41   0  0.13420
   8   5  11   46.22    8.32   0  0.11135
   8   5  12   26.36   11.47   0  0.11505
   8   5  13   25.18   11.30   0  0.11967
   8   7  -7   98.18   14.32   0  0.19473
   9   6   1   43.88   12.01   0  0.12621
   9   6   2  492.08   12.30   0  0.11640
   9   6   3   11.98   11.59   0  0.10797
   9   6   4  391.31   13.70   0  0.10128
   9   6   5   29.75   13.17   0  0.09649
   9   6   6 1080.80   16.30   0  0.09546
   9   6   7   12.17   13.48   0  0.09595
   9   6   8   15.22   13.32   0  0.09698
   9   6   9    9.47   13.46   0  0.10030
   9   6  10  996.97   15.78   0  0.10426
   9   6  11   47.82   13.09   0  0.10744
   9   7  -3   86.16   10.68   0  0.15613
   9   8  -5    3.67   12.32   0  0.17283
 -14   0   7    5.76   11.60   0  0.12387
 -14   0   8  118.26   14.73   0  0.12280
 -14   0   9   -0.35   14.07   0  0.12541
 -14   0  13    1.94   14.97   0  0.14128
 -14   1  -1   42.82    9.97   0  0.14401
 -14   1   0   80.75    9.68   0  0.14483
 -13   0   3    7.58   10.03   0  0.13205
 -13   0   4 1221.92   15.91   0  0.13114
 -13   1  -3  210.65    9.71   0  0.15106
 -13   1  -2  112.71    9.15   0  0.15213
 -13   2  -6  313.30    9.24   0  0.16689
 -12   0   1   -1.70    9.02   0  0.13745
 -12   1  -4   42.95    8.32   0  0.15922
 -12   2  -8 1010.77    8.66   0  0.16966
 -12   3 -11    3.50    5.75   0  0.18036
 -12   3 -10  705.82    9.66   0  0.17941
 -11   0  -1    0.68    8.30   0  0.14435
 -11   1  -6   35.82    5.55   0  0.16174
 -11   1  -5  124.99    7.93   0  0.16354
 -11   2  -9   31.60    5.68   0  0.17301
 -11   3 -11   10.32    7.51   0  0.18345
 -10  -1   6  779.40   13.00   0  0.12939
 -10  -1   7  575.09   14.18   0  0.12998
 -10   0  -2  794.74   10.15   0  0.15052
 -10   1  -7  160.05    5.86   0  0.16532
 -10   1  -6  362.03    8.03   0  0.16729
 -10   2 -10    7.57    5.06   0  0.17579
 -10   3 -12  151.86    7.68   0  0.18612
 -10   4 -14  258.87    8.14   0  0.19627
  -9  -1   4   14.26    8.43   0  0.13320
  -9  -1  17  210.46   14.96   0  0.17254
  -9   0  -3   28.79    7.74   0  0.15361
  -9   0  23   -1.48    9.00   0  0.20929
  -9   1  -7  194.04    7.63   0  0.17080
  -9   2 -10  645.10    8.19   0  0.18168
  -9   3 -13   17.22    5.03   0  0.18926
  -9   4 -14  307.66    7.70   0  0.20275
  -8  -1   3 1050.05   12.85   0  0.13713
  -8  -1  17   22.19   11.30   0  0.17186
  -8   0  -4  154.54    8.03   0  0.15462
  -8   0  23    0.13    7.22   0  0.20935
  -8   1  -8  712.85    8.56   0  0.16873
  -8   2 -11   44.97    7.05   0  0.18041
  -8   3 -13    5.91    6.74   0  0.19462
  -7  -1   2 2207.20   16.27   0  0.13674
  -7  -1  17  965.79   13.67   0  0.17160
  -7   0  23    1.95    6.96   0  0.20983
  -7   1  -8 2309.82   11.36   0  0.17367
  -7   2 -11  137.00    6.82   0  0.18554
  -7   3 -14   79.19    4.93   0  0.19333
  -7   5 -17  131.78    5.28   0  0.21253
  -6  -1   2 2176.44   17.13   0  0.13921
  -6  -1  17   13.82    9.02   0  0.17282
  -6   0  -5   62.35    5.34   0  0.15561
  -6   0  23    2.40    8.43   0  0.21263
  -6   1  -9    5.93    4.88   0  0.17018
  -6   2 -12 1491.87    8.46   0  0.18282
  -6   3 -14 1963.75    9.08   0  0.19378
  -6   4 -16  949.07    7.20   0  0.20559
  -5  -1   2 2882.10   21.24   0  0.13692
  -5  -1  16   43.51    9.25   0  0.16662
  -5   0  -5    7.24    5.09   0  0.15580
  -5   0  22  151.47    7.30   0  0.20387
  -5   1  -9  711.75    7.13   0  0.16970
  -5   1  26   81.15    6.95   0  0.22636
  -5   2 -12  766.79    6.81   0  0.18234
  -5   4 -16  277.37    5.35   0  0.20580
  -4  -1   3  287.61   13.57   0  0.13607
  -4  -1  14 1361.68   12.93   0  0.15368
  -4  -1  15  202.78    9.76   0  0.15984
  -4   0  21   -4.32    6.73   0  0.19984
  -4   0  22 2176.20   12.36   0  0.20545
  -4   1  -9  158.13    5.44   0  0.16901
  -4   1  25   66.28    4.89   0  0.22171
  -4   1  26  353.57    8.88   0  0.22875
  -4   2 -12 1251.19    7.98   0  0.18141
  -4   4 -16 1398.95    8.05   0  0.20570
  -3  -1  12  340.62    9.68   0  0.13853
  -3  -1  13  869.36   12.57   0  0.14551
  -3   0  -4 1526.83   13.16   0  0.15362
  -3   0  20  411.19    7.69   0  0.19290
  -3   1  25  119.31    6.88   0  0.22362
  -3   3 -14 1753.78    8.87   0  0.19339
  -2   0  -3  150.85    9.65   0  0.15202
  -2   0  19    2.59    6.73   0  0.18597
  -2   1  -8 4901.54   16.82   0  0.16414
  -2   1  23  139.19    5.18   0  0.21088
  -2   1  24  553.74    7.89   0  0.21798
  -2   2 -11    9.79    6.41   0  0.17732
  -1   0  -2  611.23   15.29   0  0.14127
  -1   0  17   -1.62    6.84   0  0.17339
  -1   1  -7  246.87    8.24   0  0.16249
  -1   1  22  177.71    7.00   0  0.20422
  -1   2  25   52.47    4.82   0  0.22269
  -1   2  26  502.23    7.69   0  0.22974
  -1   3 -13   49.13    6.32   0  0.18872
  -1   6 -18  636.68    6.72   0  0.21769
   0   0  14 3036.05   13.13   0  0.15272
   0   0  15   -7.40    7.45   0  0.15897
   0   1  -6 3601.14   20.19   0  0.15445
   0   1  20  930.83    7.06   0  0.19221
   0   1  21    7.50    6.51   0  0.19933
   0   2  24  892.18    8.35   0  0.21707
   0   5 -16 1212.46    9.30   0  0.20794
   1   0   4  504.27   13.69   0  0.11895
   1   0   5   26.96    7.98   0  0.11636
   1   0   8  417.49    8.90   0  0.11752
   1   0   9    6.92    9.34   0  0.12104
   1   0  10 1158.05   12.68   0  0.12328
   1   0  11   -4.16    8.52   0  0.12829
   1   1  18  285.82    5.65   0  0.17930
   1   1  19   -3.89    6.78   0  0.18637
   1   2  22  633.60    6.39   0  0.20518
   1   2  23   91.83    6.89   0  0.21233
   1   3  25    2.18    4.78   0  0.22319
   2   1  15  325.99    6.23   0  0.15771
   2   1  16 1199.74    9.75   0  0.16453
   2   2  -7  130.70    8.22   0  0.15761
   2   2  20 1580.71    8.29   0  0.19108
   2   2  21  266.38    7.24   0  0.19801
   2   3 -10   20.29    7.74   0  0.17906
   2   3  23    0.71    4.80   0  0.21215
   2   3  24  289.72    7.41   0  0.21886
   3   1   2 1955.19   16.89   0  0.11804
   3   1  10 1595.84   11.50   0  0.12100
   3   1  11  121.83    9.24   0  0.12579
   3   1  12 1758.80   12.58   0  0.13246
   3   2  18  505.00    7.98   0  0.17764
   3   3  21   -2.02    4.79   0  0.19872
   3   3  22   21.44    6.84   0  0.20591
   3   5 -13  303.18    8.53   0  0.19951
   4   2  14  487.67    7.10   0  0.14736
   4   2  15  128.33    7.89   0  0.15397
   4   3  19   30.09    7.45   0  0.18265
   4   4  22  186.11    7.50   0  0.20589
   5   2   3  463.68   10.88   0  0.11568
   5   2   4 3427.45   19.04   0  0.10996
   5   2   5  107.00   10.21   0  0.10705
   5   2   6   94.04   10.07   0  0.10759
   5   2   7 1350.28   13.50   0  0.10991
   5   2   8 2527.57   15.57   0  0.11311
   5   2   9  189.01    9.92   0  0.11692
   5   3  15   60.64    5.91   0  0.15332
   5   3  16  505.58    8.87   0  0.16061
   5   4  19  197.37    5.79   0  0.18388
   5   4  20   -1.10    7.45   0  0.19071
   5   7 -13  212.93   10.29   0  0.20526
   5   8 -14  250.49    9.87   0  0.20877
   6   3   0 2315.43   18.60   0  0.11936
   6   3   1   70.86    9.73   0  0.11154
   6   3   9   45.13    7.41   0  0.11146
   6   3  10 2857.13   15.88   0  0.11434
   6   3  11    2.81    9.74   0  0.11912
   6   3  12   84.79    9.62   0  0.12256
   6   4  15   -0.34    5.83   0  0.15054
   6   4  16 1191.22   10.46   0  0.15878
   6   4  17   78.37    8.22   0  0.16544
   6   7 -11   78.24   11.42   0  0.20798
   7   4  -1  140.57   11.51   0  0.12071
   7   4   0 1498.43   15.58   0  0.11010
   7   4   9   71.75    7.90   0  0.10774
   7   4  10  770.78   12.30   0  0.11068
   7   4  11  210.88   11.18   0  0.11468
   7   4  12  298.69   11.16   0  0.11886
   7   5  15   16.35    9.12   0  0.14784
   7   5  16 1059.83   11.32   0  0.15500
   8   5   0 1331.96   16.22   0  0.11961
   8   5   1   -3.55   10.42   0  0.11019
   8   5   2   10.90   11.25   0  0.10130
   8   5   6  310.31    9.85   0  0.09552
   8   5   7   78.50   12.53   0  0.09782
   8   5   8  407.97   13.28   0  0.10043
   8   5   9   11.17   11.94   0  0.10385
   8   5  10  473.33   12.71   0  0.10822
   8   6  -4  672.78   13.56   0  0.14840
   8   6  13   15.62   11.08   0  0.12522
   8   6  14   -0.80   10.51   0  0.13493
   9   7  -2  460.31   13.21   0  0.14279
   9   7  -1    6.71    9.67   0  0.13450
   9   7   9   59.26   14.87   0  0.09693
   9   8  -4   50.76   12.46   0  0.15656
 -14   0   5   -3.04   11.67   0  0.12168
 -14   0   6  248.06   15.00   0  0.12215
 -14   1  -2  247.69   10.54   0  0.14543
 -13   0   1    2.17    9.79   0  0.13500
 -13   0   2 1263.98   13.88   0  0.13152
 -13   1  -4 1063.16   12.01   0  0.14996
 -13   2  -8   73.31    6.40   0  0.16425
 -13   2  -7   26.39    8.63   0  0.16588
 -12   0  -1    2.74    9.22   0  0.13672
 -12   0   0  106.54    9.20   0  0.13838
 -12   1  -6  639.65    8.06   0  0.15645
 -12   1  -5   39.89    8.37   0  0.15830
 -12   2  -9   91.09    8.58   0  0.16823
 -11   0  -2 2160.30   13.39   0  0.14469
 -11   1  -7   37.44    5.75   0  0.16021
 -11   2 -10  390.87    8.88   0  0.17132
 -11   3 -12  116.16    7.87   0  0.18368
 -10  -1   4 1534.54   14.98   0  0.12586
 -10  -1   5    4.38   11.08   0  0.12925
 -10   0  -3   -3.70    8.17   0  0.14687
 -10   1  -8   87.52    5.75   0  0.16360
 -10   2 -11    0.89    5.31   0  0.17432
 -10   3 -13   13.83    7.62   0  0.18485
  -9  -1   3  147.67    9.17   0  0.13246
  -9   0  -4  936.11   10.10   0  0.15266
  -9   1  -8 1752.26   10.62   0  0.16878
  -9   2 -11  124.05    7.31   0  0.17958
  -9   3 -14   27.70    5.26   0  0.18723
  -9   4 -15  127.56    7.48   0  0.20085
  -8  -1   2  700.90   11.41   0  0.13477
  -8   0  -5    2.79    7.58   0  0.15623
  -8   1  -9   -6.72    7.10   0  0.16911
  -8   2 -12 1537.72   10.20   0  0.17797
  -8   3 -14 1490.61   10.38   0  0.18940
  -8   4 -16  494.98    8.16   0  0.19944
  -7  -1   1  122.47    8.74   0  0.13302
  -7   0  -5   -1.26    7.30   0  0.15648
  -7   1  -9  662.90    8.51   0  0.17132
  -7   2 -12  214.48    7.34   0  0.18243
  -7   5 -18   93.18    5.30   0  0.21006
  -6  -1   1  350.54   10.01   0  0.13560
  -6  -1  16 1974.50   16.17   0  0.16652
  -6   0  22 2497.71   13.17   0  0.20377
  -6   3 -15   17.85    4.72   0  0.19166
  -5  -1  15    9.36    9.18   0  0.15978
  -5   0  21    1.20    6.95   0  0.19684
  -5   1  25  190.90    7.42   0  0.21939
  -5   3 -15   58.17    4.79   0  0.19208
  -4  -1  13   11.19    7.88   0  0.14698
  -4   0  -5    3.19    7.54   0  0.15205
  -4   0  20   10.90    6.71   0  0.19257
  -4   3 -15   -3.71    4.45   0  0.19146
  -3  -1  10  746.38   12.97   0  0.12623
  -3  -1  11   68.59   10.49   0  0.13224
  -3   0  19    0.09    6.63   0  0.18593
  -3   1  -9  546.57    8.46   0  0.16325
  -3   1  24  648.69    8.15   0  0.21665
  -2   0  18 2273.80   11.91   0  0.18066
  -2   1  22  558.35    7.94   0  0.20378
  -2   2  26   16.24    6.66   0  0.22660
  -1   0  16  881.63    9.22   0  0.16718
  -1   1  21  197.35    7.09   0  0.19743
  -1   2 -11  985.32    9.92   0  0.16937
  -1   2  24  194.86    5.31   0  0.21559
   0   0  13   -5.82    7.75   0  0.14580
   0   1  19  248.20    7.32   0  0.18526
   0   2 -10 3178.59   14.95   0  0.16928
   0   2  23    3.25    6.44   0  0.21278
   0   4 -15   40.31    6.36   0  0.19339
   1   0   6  406.90   12.36   0  0.11436
   1   0   7    2.48   10.16   0  0.11489
   1   1  17  208.77    7.23   0  0.17247
   1   2  -9  115.66    7.59   0  0.16004
   1   2  21   43.62    6.88   0  0.19785
   1   3 -12 1781.16   11.88   0  0.17571
   1   3  24  478.60    7.69   0  0.21612
   1   4 -14   46.26    6.14   0  0.19432
   1   7 -18  218.30    7.30   0  0.21880
   2   1  13   50.76    5.93   0  0.14361
   2   1  14  322.10    8.41   0  0.15099
   2   2  19    5.95    6.76   0  0.18364
   2   3  22 1198.37    7.44   0  0.20471
   2   4 -13  791.10    9.14   0  0.18790
   2   5 -15  427.43    7.98   0  0.19520
   2   6 -16   96.16    7.82   0  0.20861
   2   7 -17    6.10    7.85   0  0.21499
   3   1   3   30.68   10.57   0  0.10997
   3   1   4  106.61   10.95   0  0.10852
   3   1   5  445.39    9.65   0  0.10669
   3   1   6 1390.80   12.85   0  0.10867
   3   1   7  101.34   10.16   0  0.11098
   3   1   8  521.65   11.33   0  0.11357
   3   1   9  570.18   11.03   0  0.11835
   3   2  16  438.07    8.30   0  0.16381
   3   2  17  117.46    7.43   0  0.17076
   3   3  20  448.00    7.69   0  0.19160
   3   6 -15   41.11    7.68   0  0.20340
   3   7 -16    7.65    7.84   0  0.21125
   3   8 -17    4.14    8.33   0  0.21596
   4   2  -2  412.61   13.89   0  0.12753
   4   2  12 1415.29   11.71   0  0.13264
   4   2  13  163.68    8.72   0  0.13949
   4   3  17   31.11    5.37   0  0.16937
   4   3  18 2017.81   10.93   0  0.17639
   4   4  20  832.45    7.14   0  0.19209
   4   4  21   81.47    7.31   0  0.19946
   4   5 -12  505.93   10.43   0  0.18767
   4   7 -15   14.83    8.07   0  0.20362
   5   3  13    8.52    5.81   0  0.13863
   5   3  14  722.30    9.78   0  0.14586
   5   4  17   26.58    5.48   0  0.16849
   5   4  18  612.78    8.79   0  0.17593
   5   5 -10   48.80   10.85   0  0.18884
   5   6 -12   45.42    9.41   0  0.19074
   6   3   2  515.10   11.79   0  0.10897
   6   3   3    8.77   10.18   0  0.10484
   6   3   4 1273.10   14.75   0  0.09946
   6   3   5   48.81   10.95   0  0.10024
   6   3   6 1800.98   15.60   0  0.10226
   6   3   7   53.19   10.78   0  0.10609
   6   3   8  602.21   11.83   0  0.10915
   6   4  -5  480.69   15.35   0  0.14994
   6   4  13  199.10    6.88   0  0.13529
   6   4  14    4.36    8.51   0  0.14386
   6   5  17    9.40    8.22   0  0.16855
   6   5  18  271.97    8.49   0  0.17613
   7   4   1  272.05   11.47   0  0.10706
   7   4   2  149.75   11.27   0  0.10197
   7   4   3   58.53   11.40   0  0.09629
   7   4   4 1613.16   16.51   0  0.09394
   7   4   5  310.16   12.47   0  0.09590
   7   4   6  140.04   11.68   0  0.09817
   7   4   7  340.28   12.05   0  0.10173
   7   4   8  732.77   12.88   0  0.10536
   7   5  -5  165.22   12.60   0  0.15297
   7   5  12 1271.30   10.80   0  0.12279
   7   5  13  235.13   10.15   0  0.13208
   7   5  14   10.93    9.42   0  0.13977
   8   5   3  236.87   15.21   0  0.09631
   8   5   4  794.23   14.74   0  0.09397
   8   5   5   10.92   12.30   0  0.09343
   8   6  -3   50.10   10.79   0  0.13593
   8   6  10  297.85    9.99   0  0.10215
   8   6  11   -7.67   12.32   0  0.10650
   8   6  12  144.01   12.19   0  0.11520
   8   7  -6  503.28   14.69   0  0.15879
   9   7   0   97.50   13.01   0  0.12353
   9   7   1   51.34   11.33   0  0.11749
   9   7   2  302.40   12.95   0  0.10963
   9   7   3   -0.59   13.36   0  0.09873
   9   7   4  340.11   14.96   0  0.09601
   9   7   5   22.75   14.23   0  0.09358
   9   7   6   88.13   14.23   0  0.09501
   9   7   7   10.19   14.33   0  0.09501
   9   7   8  750.16   16.73   0  0.09633
   9   8  -3    4.19   11.59   0  0.14473
   9   8  -2    2.42   10.19   0  0.13411
 -14   0   3   -0.37   11.53   0  0.12119
 -14   0   4  107.13   14.32   0  0.12120
 -14   1  -4    6.45   10.07   0  0.14403
 -14   1  -3  116.26   10.16   0  0.14512
 -13   0   0  259.08   10.84   0  0.13095
 -13   1  -5   20.89    9.07   0  0.15145
 -12   0  -2  104.16    9.59   0  0.13665
 -12   1  -7   71.56    9.00   0  0.15486
 -12   2 -10  160.03    8.92   0  0.16632
 -11  -1   6 1810.79   18.86   0  0.12117
 -11  -1   7  113.51   13.26   0  0.12030
 -11  -1   8   12.36   14.51   0  0.12207
 -11  -1   9  210.82   15.49   0  0.12608
 -11  -1  10 1162.28   20.88   0  0.12955
 -11   0  -4   38.87    8.94   0  0.14157
 -11   0  -3    4.31    8.57   0  0.14337
 -11   0  21    0.54    9.80   0  0.19364
 -11   1  -8 1124.12   10.83   0  0.15829
 -11   2 -11   76.11    8.33   0  0.16928
 -11   3 -13    7.99    7.95   0  0.18000
 -10  -1   3  435.71   11.12   0  0.12666
 -10   0  -5   -6.03    8.12   0  0.14754
 -10   0  -4  203.62    8.49   0  0.14690
 -10   0  22  835.91   14.27   0  0.20070
 -10   1  -9   34.14    7.89   0  0.16154
 -10   2 -12 1037.84    8.39   0  0.17215
 -10   3 -14  814.22    9.66   0  0.18193
  -9  -1   1   82.07    9.42   0  0.12697
  -9  -1   2 1542.33   15.61   0  0.12946
  -9  -1  16  818.62   20.26   0  0.16605
  -9   0  -5   -0.54    8.14   0  0.14824
  -9   0  22   90.97    9.51   0  0.20094
  -9   1  -9  176.45    7.63   0  0.16625
  -9   2 -12    6.77    7.22   0  0.17736
  -9   3 -15   20.80    5.48   0  0.18473
  -9   4 -16   75.69    7.51   0  0.19820
  -8  -1   1   79.04   10.67   0  0.13179
  -8  -1  16  947.46   16.08   0  0.16540
  -8   0  -6 1809.16   11.90   0  0.14943
  -8   0  22 1512.13   13.54   0  0.20162
  -8   1 -10  556.03    8.54   0  0.16439
  -8   2 -13  310.62    8.19   0  0.17563
  -8   3 -15    8.27    7.32   0  0.18638
  -8   4 -17   11.49    7.32   0  0.19728
  -7  -1   0   19.92    8.25   0  0.13133
  -7  -1  16  690.50   14.16   0  0.16568
  -7   0  -6 3079.59   13.80   0  0.15378
  -7   0  22    3.56    8.61   0  0.20227
  -7   1 -10  358.55    7.89   0  0.16822
  -7   1  25  136.04    7.58   0  0.21684
  -7   2 -13    1.37    7.03   0  0.17802
  -7   3 -15   47.22    6.91   0  0.19093
  -6  -1   0 1794.44   15.08   0  0.13047
  -6  -1  15  252.64   10.85   0  0.16060
  -6   0  -6 4727.99   16.49   0  0.15368
  -6   0  21   -0.25    7.13   0  0.19622
  -6   1 -10  493.67    8.15   0  0.16767
  -6   1  25    0.35    6.98   0  0.21968
  -6   2 -13  127.01    7.15   0  0.18004
  -5  -1   1  400.16   12.69   0  0.13055
  -5  -1  14  292.19   10.91   0  0.15425
  -5   0  -6 1309.94   10.81   0  0.15317
  -5   0  20  271.92    7.73   0  0.19029
  -5   1 -10  969.38    9.10   0  0.16691
  -5   1  24  193.63    7.31   0  0.21212
  -5   2 -13   39.46    6.88   0  0.17692
  -4  -1   2 4055.32   30.66   0  0.12704
  -4  -1  12 1838.99   16.12   0  0.14089
  -4   0  -6 3275.68   15.49   0  0.14746
  -4   0  19   -0.81    6.80   0  0.18584
  -4   1 -10  182.46    7.56   0  0.16550
  -4   1  24  925.90    8.89   0  0.21450
  -4   2 -13  140.03    6.92   0  0.17780
  -4   2  26   68.79    5.15   0  0.22260
  -3  -1   8 2768.29   25.36   0  0.11540
  -3  -1   9  211.77   12.88   0  0.11967
  -3   0  -5    8.81    7.91   0  0.14758
  -3   0  18  389.61    8.00   0  0.17931
  -3   1 -10 1408.28    9.29   0  0.16018
  -3   1  22  475.13    6.20   0  0.20233
  -3   1  23   10.06    6.77   0  0.20957
  -3   2  26  306.23    7.51   0  0.22523
  -2   0  -4 3157.07   19.18   0  0.14354
  -2   0  16   98.75    5.33   0  0.16736
  -2   0  17    2.02    6.84   0  0.17366
  -2   1  -9  700.80    9.39   0  0.15895
  -2   1  21   10.06    6.83   0  0.19599
  -2   2 -12 1140.54    9.46   0  0.17305
  -2   2  24  680.88    6.52   0  0.21340
  -2   2  25  102.28    6.85   0  0.22073
  -2   4 -17   33.55    4.74   0  0.19610
  -1   0  14  392.22    8.72   0  0.15422
  -1   0  15   -7.39    7.21   0  0.16025
  -1   1  -8   30.87    7.45   0  0.15349
  -1   1  20 1136.73    9.16   0  0.19129
  -1   2  23  238.74    7.33   0  0.20817
   0   0  11    0.11    8.38   0  0.13236
   0   0  12 2938.75   15.15   0  0.13927
   0   1  -7  385.74    8.17   0  0.14569
   0   1  18  437.56    7.84   0  0.17880
   0   2  22    5.94    6.57   0  0.20489
   0   3  24  162.43    5.19   0  0.21410
   0   3  25    7.91    6.72   0  0.22127
   1   1  -5 1387.35   18.16   0  0.13640
   1   1  15    4.96    5.13   0  0.15881
   1   1  16  873.74    8.91   0  0.16590
   1   2  20  403.89    7.54   0  0.19109
   1   3  23   33.81    6.94   0  0.20900
   2   1  12 4650.53   17.18   0  0.13764
   2   2  17  209.87    5.50   0  0.17089
   2   2  18  174.84    7.25   0  0.17782
   2   3 -11   24.67    6.94   0  0.16443
   2   3  21   -3.00    6.79   0  0.19681
   2   4  23   17.86    4.94   0  0.20983
   2   7 -18    5.96    6.79   0  0.20579
   3   2  14  201.82    6.18   0  0.15030
   3   2  15  344.11    8.40   0  0.15683
   3   3  -9  141.68   10.70   0  0.16372
   3   3  18  368.80    6.17   0  0.17716
   3   3  19   12.97    7.06   0  0.18482
   3   4 -12 1938.37   14.25   0  0.17665
   3   4  21   -0.52    5.01   0  0.19837
   3   4  22  476.93    7.87   0  0.20541
   3   5 -14  752.80    9.52   0  0.18928
   4   2   9  656.83    9.44   0  0.11127
   4   2  10 1430.75   13.07   0  0.11815
   4   2  11   87.76    9.41   0  0.12458
   4   3  15   10.47    5.55   0  0.15568
   4   3  16    2.20    7.51   0  0.16257
   4   4 -10  105.30   10.05   0  0.16988
   4   4  19    7.49    7.35   0  0.18449
   4   5  21   27.82    5.31   0  0.19887
   4   6 -14  949.49   12.37   0  0.19204
   4   8 -16   25.56    8.79   0  0.20551
   5   3  11   14.41    6.70   0  0.12358
   5   3  12  214.37    9.25   0  0.13071
   5   4  16  365.10    8.60   0  0.16113
   5   5  18   11.11    5.43   0  0.17871
   5   5  19    3.03    7.61   0  0.18610
   6   4  11    6.01    7.08   0  0.11990
   6   4  12 1576.49   12.71   0  0.12826
   6   5  15  102.69    8.93   0  0.15217
   6   5  16    4.00    8.38   0  0.16086
   6   6  17    0.52    5.97   0  0.17170
   7   5  -4  142.63   11.57   0  0.13026
   7   5  10  401.02   12.53   0  0.10493
   7   5  11   75.74   10.77   0  0.11472
   7   6  14 1138.41   12.04   0  0.14279
   7   6  15   36.15    9.38   0  0.15066
   8   6  -2  699.05   14.57   0  0.12313
   8   6   7   51.96   13.84   0  0.09113
   8   6   8  268.79   14.28   0  0.09452
   8   6   9    0.91   13.12   0  0.09823
   8   7  11  123.07   13.09   0  0.10935
   9   8  -1   37.00   13.47   0  0.12717
   9   8   0  162.86   12.37   0  0.11877
   9   8   1    7.05   12.38   0  0.11022
   9   8   2   16.18   13.26   0  0.10413
   9   8   3   26.52   14.01   0  0.09951
   9   8   4  142.97   14.99   0  0.09800
 -15   0   4  481.12   15.14   0  0.11145
 -15   0   5   -0.32   13.50   0  0.11108
 -14   0   0   86.28   11.66   0  0.12219
 -14   0   1    6.22   11.60   0  0.11962
 -14   0   2  157.41   14.70   0  0.12110
 -14   1  -5    6.62    9.94   0  0.14659
 -13   0  -2 1467.91   14.27   0  0.12921
 -13   0  -1    1.10   10.35   0  0.12794
 -13   1  -7    5.76    9.30   0  0.15123
 -13   1  -6   14.13    9.11   0  0.15055
 -12   0  -4  169.16    7.33   0  0.13624
 -12   0  -3   -3.24    9.30   0  0.13507
 -12   1  -8   -3.26    8.81   0  0.15515
 -12   2 -12  401.11    7.43   0  0.16663
 -12   2 -11    2.48    8.55   0  0.16799
 -11  -1   3   66.69   10.37   0  0.11914
 -11  -1   4  127.34   12.86   0  0.11968
 -11  -1   5  112.02   13.02   0  0.11915
 -11  -1  11   68.88   15.68   0  0.13609
 -11   0  -5   11.31    8.74   0  0.14374
 -11   1  -9   60.97    8.55   0  0.15660
 -11   2 -12  254.25    9.03   0  0.16766
 -10  -1   1   19.12    9.55   0  0.12271
 -10  -1   2   68.95   11.84   0  0.12384
 -10   0  -6  404.99    9.50   0  0.14359
 -10   0  21   -1.10    9.58   0  0.19189
 -10   1 -10  589.24    9.52   0  0.15974
 -10   2 -13  209.55    6.36   0  0.17044
 -10   3 -15    0.32    8.12   0  0.18177
  -9  -1   0  551.62   10.96   0  0.12808
  -9   0  -7    8.93    5.82   0  0.14667
  -9   0  -6 3305.20   14.61   0  0.14828
  -9   0  21   -1.84    7.55   0  0.19339
  -9   1 -11   36.14    5.48   0  0.16224
  -9   1 -10    9.16    7.33   0  0.16398
  -9   2 -13   21.61    7.43   0  0.17508
  -9   3 -16  121.76    5.92   0  0.18258
  -8  -1  -1  397.23   10.31   0  0.12685
  -8  -1   0 2410.86   17.28   0  0.12904
  -8   0  -7    2.81    7.65   0  0.15011
  -8   0  21    1.37    7.53   0  0.19510
  -8   1 -11  264.02    8.16   0  0.16205
  -8   2 -14   90.60    5.62   0  0.17347
  -8   3 -16  408.99    8.40   0  0.18317
  -7  -1  -1  344.90    9.72   0  0.13070
  -7  -1  15   86.63   11.74   0  0.16036
  -7   0  -7   -1.25    7.52   0  0.15145
  -7   0  21    3.22    8.78   0  0.19495
  -7   1 -11   33.43    7.33   0  0.16556
  -7   2 -14  939.77    9.33   0  0.17410
  -7   3 -16  319.89    7.74   0  0.18855
  -6  -1  -1   85.76    9.03   0  0.12750
  -6  -1  14 2155.67   18.42   0  0.15470
  -6   0  -7    4.01    7.56   0  0.15108
  -6   0  20  642.36    9.37   0  0.18798
  -6   1 -11  292.82    7.96   0  0.16480
  -6   1  24 1188.40   10.02   0  0.20989
  -6   2 -14   17.64    7.03   0  0.17651
  -6   3 -16  107.87    6.94   0  0.18880
  -5  -1   0  411.86   10.89   0  0.12723
  -5  -1  13 1010.11   14.41   0  0.14836
  -5   0  -7   18.23    7.59   0  0.14671
  -5   1 -11   10.64    7.18   0  0.16419
  -5   1  23    6.80    4.91   0  0.20457
  -5   2 -14  630.03    8.10   0  0.17589
  -5   3 -16  385.62    7.42   0  0.18880
  -5   5 -20  420.79    6.49   0  0.20479
  -4  -1   1  402.71   12.66   0  0.12249
  -4  -1  11  188.48   11.59   0  0.13502
  -4   0  -7    4.42    5.54   0  0.14444
  -4   0  18 2062.86   12.18   0  0.17781
  -4   1 -11  509.49    8.66   0  0.15893
  -4   1  23  145.32    7.00   0  0.20732
  -4   2 -14  449.44    7.95   0  0.17037
  -3  -1   7    7.11   12.27   0  0.11194
  -3   0  -6  200.37    8.70   0  0.14174
  -3   0  17   -2.65    6.86   0  0.17288
  -3   1  21  111.95    5.19   0  0.19484
  -3   2  25   50.16    7.01   0  0.21795
  -2   0  -5   32.40    9.27   0  0.13531
  -2   0  15   10.49    7.19   0  0.16014
  -2   1 -10  142.21    5.82   0  0.15320
  -2   1  20 1290.17    9.79   0  0.18900
  -2   2 -13  251.61    7.77   0  0.16674
  -2   2  23   21.39    4.79   0  0.20592
  -1   0  -3    6.90   11.13   0  0.13183
  -1   0  13    1.97    7.61   0  0.14724
  -1   1  -9 1244.64   10.23   0  0.14824
  -1   1  18 1113.79    8.00   0  0.17725
  -1   1  19    2.80    6.84   0  0.18459
  -1   2 -12 3861.61   15.15   0  0.16567
  -1   2  22  517.80    7.74   0  0.20068
  -1   3  25    0.99    6.94   0  0.21467
   0   0   9   -0.31    9.22   0  0.11925
   0   0  10 6327.72   23.04   0  0.12593
   0   1  16 2126.00   10.40   0  0.16532
   0   1  17   20.61    7.05   0  0.17229
   0   2 -11   23.44    7.14   0  0.15982
   0   2  20  938.03    7.30   0  0.18971
   0   2  21  201.41    7.09   0  0.19691
   0   3 -14  529.63    8.21   0  0.17449
   0   3  23   16.18    4.88   0  0.20636
   0   6 -19   40.45    6.55   0  0.20716
   1   1  14  956.75    9.80   0  0.15232
   1   2 -10 1624.48   13.45   0  0.14860
   1   2  18  610.52    6.51   0  0.17646
   1   2  19  228.37    7.31   0  0.18374
   1   3 -13   43.80    7.25   0  0.16654
   1   3  21   -0.21    4.78   0  0.19645
   1   3  22  336.08    7.55   0  0.20336
   1   4 -15   94.09    6.75   0  0.18535
   1   4  24   14.79    7.05   0  0.21259
   1   5 -17   35.99    6.68   0  0.19100
   1   7 -19    5.19    8.55   0  0.20958
   2   1  10  165.95    9.38   0  0.12366
   2   1  11 1341.94   12.03   0  0.13007
   2   2  -8 1331.29   15.22   0  0.14190
   2   2  16 1222.65    9.75   0  0.16388
   2   3  19    6.20    4.96   0  0.18403
   2   3  20   37.96    6.76   0  0.19113
   2   4 -14  873.30    9.87   0  0.17737
   2   4  22   33.17    6.93   0  0.20247
   2   5 -16 1264.09   10.82   0  0.18641
   2   6 -17   17.22    8.19   0  0.19899
   3   2  13    1.03    8.13   0  0.14276
   3   3  17    3.36    7.19   0  0.16994
   3   4  20   74.06    7.18   0  0.19093
   3   5  22   28.38    5.22   0  0.20307
   3   6 -16  355.21    9.59   0  0.19344
   3   7 -17  145.99    9.07   0  0.20058
   4   2  -1 1406.82   19.85   0  0.11070
   4   2   6 2222.13   15.07   0  0.10107
   4   2   7  297.78   11.40   0  0.10344
   4   2   8 1061.03   13.00   0  0.10761
   4   3  14 1773.10   11.50   0  0.14873
   4   4  17  101.94    5.58   0  0.17073
   4   4  18   11.45    7.54   0  0.17784
   4   5  20   -0.43    7.44   0  0.19243
   5   3   9   75.72   10.46   0  0.10799
   5   3  10 2394.44   14.98   0  0.11436
   5   4  14  773.94    9.88   0  0.14706
   5   4  15  251.59    8.59   0  0.15367
   5   5  17  194.17    8.15   0  0.17134
   6   4  -4  785.91   16.49   0  0.11793
   6   4   9   66.65   11.51   0  0.10267
   6   4  10  291.73   11.46   0  0.11008
   6   5  13   -0.22    6.62   0  0.13721
   6   5  14  536.95   10.14   0  0.14437
   6   6  16  244.41    9.01   0  0.16435
   7   5  -3   50.15   11.95   0  0.11650
   7   5   7   97.31   12.82   0  0.09343
   7   5   8 1297.47   15.62   0  0.09644
   7   5   9  452.45   12.93   0  0.10117
   7   6  11   23.83    7.88   0  0.11701
   7   6  12    6.25   10.45   0  0.12585
   7   6  13    0.59    9.99   0  0.13375
   8   6  -1    2.49   13.41   0  0.10800
   8   6   0  329.47   15.15   0  0.10360
   8   6   1   38.13   12.36   0  0.09616
   8   6   2  893.53   16.20   0  0.08952
   8   6   3   68.73   13.95   0  0.08622
   8   6   4   -1.36   14.18   0  0.08415
   8   6   5   22.96   14.21   0  0.08477
   8   6   6  742.39   16.13   0  0.08787
   8   7  -5    4.20   12.37   0  0.14246
   8   7   8  212.05   15.62   0  0.08939
   8   7   9  161.62   15.08   0  0.09306
   8   7  10  251.10   15.02   0  0.09766
   8   8  -7    2.03   13.07   0  0.15999
 -14   0  -2    1.83    7.83   0  0.12407
 -14   0  -1   -1.75   11.22   0  0.12282
 -13   0  -4   98.85    7.66   0  0.13158
 -13   0  -3    2.62   10.05   0  0.13287
 -13   1  -8  701.46   11.28   0  0.14957
 -12  -1   4 1100.51   15.20   0  0.11330
 -12  -1   5   53.34   13.89   0  0.11315
 -12  -1   6   15.50   14.24   0  0.11188
 -12  -1   7  326.21   15.15   0  0.11508
 -12  -1   8  693.01   18.42   0  0.11823
 -12  -1   9    6.27   14.93   0  0.12428
 -12   0  -5   -0.42    9.46   0  0.13769
 -12   1  -9    6.02    8.67   0  0.15630
 -11  -1   1  110.01   10.50   0  0.11903
 -11  -1   2 1161.86   15.78   0  0.11937
 -11   0  -6 2010.32   13.63   0  0.14213
 -11   1 -10  155.46    8.79   0  0.15940
 -11   2 -13    4.67    8.21   0  0.16994
 -10  -1  -1  306.91   10.50   0  0.12207
 -10  -1   0 1722.48   14.48   0  0.12439
 -10   0  -7   -5.00    8.21   0  0.14445
 -10   1 -11  100.71    8.44   0  0.15851
 -10   2 -14  295.88    8.92   0  0.16938
  -9  -1  -2 1118.23   12.62   0  0.12481
  -9  -1  -1  202.05    9.62   0  0.12718
  -9  -1  15   -0.70   15.35   0  0.16050
  -9   0  -8   34.76    8.34   0  0.14559
  -9   1 -12 1150.91    8.76   0  0.16098
  -9   2 -14  435.86    8.84   0  0.17392
  -9   3 -17   12.23    5.71   0  0.18154
  -8  -1  -2   26.13    8.81   0  0.12900
  -8  -1  15  625.22   16.36   0  0.15947
  -8   0  -8  196.22    8.21   0  0.14953
  -8   1 -12   13.23    7.54   0  0.16232
  -8   1  24 1060.37   10.39   0  0.20763
  -8   2 -15   -1.24    5.41   0  0.17227
  -8   3 -17   -9.53    7.60   0  0.18435
  -7  -1  -2 2420.36   15.42   0  0.12942
  -7   0  -8  929.49    9.72   0  0.15021
  -7   0  20  232.88    8.13   0  0.18767
  -7   1 -12 1941.89   11.39   0  0.16377
  -7   1  24   16.29    7.29   0  0.20931
  -7   2 -15   70.32    7.70   0  0.17190
  -7   3 -17    4.58    7.10   0  0.18642
  -6  -1  -2  398.48   10.03   0  0.12825
  -6   0  -8   47.65    7.64   0  0.14969
  -6   1 -12  308.61    8.03   0  0.16322
  -6   1  23  101.43    7.55   0  0.20197
  -6   2 -15    1.63    7.20   0  0.17556
  -6   3 -17    3.04    6.88   0  0.18715
  -5  -1  -1  530.97   11.26   0  0.12512
  -5  -1  12 1458.18   17.00   0  0.14214
  -5   0  -8 1747.26   11.77   0  0.14844
  -5   0  19    3.72    8.60   0  0.18424
  -5   1 -12 2342.97   11.92   0  0.16138
  -5   2 -15  224.69    7.67   0  0.17076
  -5   3 -17   42.03    7.06   0  0.18686
  -4  -1   0  518.61   13.31   0  0.11620
  -4  -1  10 2689.74   22.96   0  0.12908
  -4   0  -8  798.84    8.43   0  0.14287
  -4   1 -12 1575.36    9.59   0  0.15706
  -4   1  22   84.15    7.03   0  0.20006
  -4   2 -15  117.58    5.36   0  0.16857
  -4   2  25   66.80    7.13   0  0.21529
  -3  -1   6  227.66   17.55   0  0.11064
  -3   0  -7    4.42    8.20   0  0.13807
  -3   0  16  557.68    9.04   0  0.16546
  -3   1 -11  103.80    7.62   0  0.15788
  -3   2 -14  245.44    7.32   0  0.16882
  -3   2  24  623.19    8.35   0  0.21088
  -3   3 -17    0.53    4.71   0  0.18080
  -3   4 -19  181.12    5.47   0  0.19253
  -2   0  14 3926.00   16.56   0  0.15383
  -2   1  19  164.96    7.30   0  0.18179
  -2   2 -14 1579.70    9.52   0  0.16326
  -2   2  22  282.68    5.65   0  0.19875
  -2   3 -16  167.02    7.15   0  0.18164
  -2   3  25    2.88    6.82   0  0.21742
  -1   0  12  440.26    9.52   0  0.14080
  -1   1  17  214.35    5.81   0  0.17035
  -1   2 -13   53.85    7.49   0  0.15844
  -1   2  21   47.40    6.84   0  0.19314
  -1   3  24  433.73    7.69   0  0.21183
   0   0   7    3.42   11.20   0  0.10613
   0   0   8 5446.59   25.16   0  0.11166
   0   1  -8 3800.48   19.57   0  0.13771
   0   1  15  609.59    7.17   0  0.15857
   0   2 -12  177.06    8.14   0  0.15315
   0   2  19    3.40    4.92   0  0.18242
   0   3  22 1206.38    9.27   0  0.19945
   0   4  24  547.07    6.36   0  0.20964
   0   6 -20   63.62    7.18   0  0.20037
   1   1  12  475.04    7.50   0  0.13908
   1   1  13  636.30    9.55   0  0.14576
   1   2  17    4.01    5.02   0  0.16916
   1   3  20  384.55    5.84   0  0.18898
   1   4 -16 1716.04   11.46   0  0.17829
   1   4  23   56.11    7.05   0  0.20747
   1   6 -19    1.50    7.03   0  0.19603
   1   7 -20  132.43    7.93   0  0.20318
   2   1   8 5629.48   22.90   0  0.10974
   2   1   9  776.55   12.05   0  0.11608
   2   2  15    6.54    7.49   0  0.15740
   2   3 -12  456.69    9.22   0  0.15651
   2   3  18 1788.05    9.05   0  0.17688
   2   4  21   92.61    7.18   0  0.19542
   2   6 -18  887.38   10.49   0  0.19141
   2   7 -19   20.28    7.19   0  0.20018
   3   2  11  911.97   10.96   0  0.12953
   3   2  12 2239.22   13.13   0  0.13629
   3   3  16  221.52    8.00   0  0.16279
   3   4  19  214.96    7.68   0  0.18496
   3   5 -15   -0.66    6.70   0  0.17851
   3   5  21  150.12    7.72   0  0.19690
   4   2   0 1220.36   18.95   0  0.10272
   4   2   1  213.80   12.43   0  0.09806
   4   2   2 2629.05   21.57   0  0.09163
   4   2   3  332.13   12.65   0  0.09250
   4   2   4  444.61   12.68   0  0.09483
   4   2   5  331.00   12.01   0  0.09913
   4   3  12  406.05    7.34   0  0.13483
   4   3  13   14.05    8.39   0  0.14171
   4   4  16 1625.37   10.82   0  0.16352
   4   5 -13   16.48    8.79   0  0.16954
   4   5  18  430.67    6.45   0  0.17842
   4   5  19   87.61    7.67   0  0.18613
   4   7 -16  466.46   11.44   0  0.19034
   4   8 -17    8.13    9.07   0  0.19597
   5   3  -3   77.99   14.80   0  0.10814
   5   3   6 2819.53   16.68   0  0.09582
   5   3   7   35.28   11.29   0  0.09842
   5   3   8  251.38   11.32   0  0.10354
   5   4  12  902.66    8.73   0  0.13291
   5   4  13  117.95    8.73   0  0.14017
   5   5  15   25.74    5.70   0  0.15676
   5   5  16 1527.85   10.76   0  0.16414
   5   6  17    6.84    5.69   0  0.17305
   5   6  18  711.04    9.28   0  0.18017
   5   7 -14   99.81   10.67   0  0.18690
   5   8 -15   56.86   10.52   0  0.19306
   6   4  -3  461.89   15.43   0  0.10398
   6   4   6  973.82   14.93   0  0.09246
   6   4   7  178.35   12.53   0  0.09559
   6   4   8  993.09   14.04   0  0.10032
   6   5  11  178.79    7.69   0  0.12263
   6   5  12  309.20   10.29   0  0.13031
   6   6  14  166.68    9.31   0  0.14896
   6   6  15   29.51    8.86   0  0.15658
   7   5  -2 1277.87   18.29   0  0.10285
   7   5  -1  279.86   13.26   0  0.09335
   7   5   0   27.17   13.22   0  0.08515
   7   5   1   56.59   14.02   0  0.07995
   7   5   2 1625.01   19.09   0  0.07989
   7   5   3  105.62   13.66   0  0.08184
   7   5   4  543.18   15.15   0  0.08387
   7   5   5   57.57   13.03   0  0.08819
   7   5   6 1720.52   17.28   0  0.09114
   7   6  -7   11.70   13.83   0  0.14956
   7   6   9   18.16    8.98   0  0.10060
   7   6  10 1473.07   14.82   0  0.10953
   7   7  12  584.33   11.94   0  0.13029
   7   7  13    1.14   10.01   0  0.13995
   8   7  -4  250.98   12.92   0  0.12789
   8   7  -3  185.26   13.56   0  0.11920
   8   7   5  176.72   15.52   0  0.08429
   8   7   6   99.80   15.45   0  0.08542
   8   7   7  148.95   15.47   0  0.08710
 -14   0  -3    1.19   11.61   0  0.12214
 -13   0  -5   -7.31   10.61   0  0.13254
 -13   1  -9   25.64    9.48   0  0.15146
 -12  -1   1   15.68   11.18   0  0.11281
 -12  -1   2   77.93   11.38   0  0.11327
 -12  -1   3  132.83   14.43   0  0.11140
 -12  -1  10  492.08   19.42   0  0.13011
 -12   0  -7    0.72    6.78   0  0.13707
 -12   0  -6    5.22    9.24   0  0.13847
 -12   1 -11   33.43    6.64   0  0.15367
 -12   1 -10  333.03    9.78   0  0.15475
 -11  -1  -1  284.91   11.37   0  0.11746
 -11  -1   0  651.23   12.19   0  0.11865
 -11   0  -8   10.78    6.28   0  0.14017
 -11   0  -7    1.16    9.25   0  0.13936
 -11   0  20   13.30   11.65   0  0.18542
 -11   1 -12  676.34    8.43   0  0.15662
 -11   1 -11   29.88    8.73   0  0.15791
 -11   2 -14  127.95    8.76   0  0.16832
 -10  -1  -3  106.87    7.20   0  0.12220
 -10  -1  -2  148.83    9.86   0  0.12404
 -10   0  -9    3.02    6.18   0  0.14344
 -10   0  -8  380.74    9.40   0  0.14478
 -10   0  20  993.29   14.26   0  0.18513
 -10   1 -12   48.79    8.13   0  0.16032
 -10   2 -15    4.99    8.19   0  0.17150
  -9  -1  -3  239.62    9.97   0  0.12554
  -9   0  -9    3.61    8.49   0  0.14637
  -9   0  20   31.36    9.63   0  0.18568
  -9   1 -13   70.56    5.91   0  0.15905
  -9   2 -16  165.25    6.39   0  0.17032
  -9   2 -15   67.49    8.28   0  0.17188
  -8  -1  -4 1732.06   13.48   0  0.12497
  -8  -1  -3  290.56    9.68   0  0.12712
  -8   0  -9   -6.43    7.96   0  0.14601
  -8   0  20  932.72   12.42   0  0.18586
  -8   1 -13    2.83    7.95   0  0.15864
  -8   2 -16  907.23   10.11   0  0.17012
  -8   3 -18  594.49    9.34   0  0.18034
  -7  -1  -4  749.38   11.34   0  0.12441
  -7  -1  -3  152.79    9.31   0  0.12663
  -7  -1  14  117.89   12.16   0  0.15412
  -7   0 -10 2984.05   12.48   0  0.14617
  -7   0  -9   -8.23    8.01   0  0.14578
  -7   1 -13  109.71    7.85   0  0.16149
  -7   1  23   27.91    7.37   0  0.20091
  -7   2 -16   19.92    7.72   0  0.16981
  -7   3 -18   13.66    7.46   0  0.18495
  -6  -1  -3  204.14    9.68   0  0.12586
  -6  -1  13   80.27   10.62   0  0.14827
  -6   0 -10 1551.06    9.88   0  0.14559
  -6   0  -9   55.23    7.97   0  0.14675
  -6   0  19   -2.16    9.09   0  0.18085
  -6   1 -13   -3.52    7.49   0  0.15877
  -6   2 -16 1348.34   10.39   0  0.17048
  -6   2  25   62.68    7.41   0  0.20817
  -6   3 -18 1153.98    9.70   0  0.18517
  -6   4 -20  350.62    8.35   0  0.19204
  -5  -1  -3   31.11    6.40   0  0.11913
  -5  -1  -2 3747.67   20.07   0  0.12182
  -5   0  -9   -1.09    8.16   0  0.14168
  -5   0  18   14.81    7.24   0  0.17552
  -5   1 -13  204.95    8.10   0  0.15748
  -5   1  22  632.62    8.59   0  0.19747
  -5   2 -16   32.20    7.35   0  0.16770
  -5   2  25   61.26    8.81   0  0.21185
  -5   3 -18   64.09    7.29   0  0.18461
  -4  -1  -1  114.30   10.76   0  0.11285
  -4   0  -9    5.00    5.77   0  0.14035
  -4   0  17   -0.33    8.63   0  0.17195
  -4   1 -13   -1.69    5.40   0  0.15464
  -4   1  21    8.30    6.92   0  0.19284
  -4   2 -16 1021.96    7.87   0  0.16615
  -4   2  24  396.62    7.91   0  0.20742
  -3   0  -8  783.34    8.92   0  0.13554
  -3   0  15    2.91    7.35   0  0.15849
  -3   1 -12 1528.32   10.98   0  0.15409
  -3   1  20  297.54    7.65   0  0.18754
  -3   2 -15  301.50    7.82   0  0.16699
  -3   2  23  196.93    7.37   0  0.20308
  -3   3 -18  303.12    6.01   0  0.17856
  -3   3  25    5.82    7.13   0  0.21013
  -2   0  -6 2213.33   15.78   0  0.13259
  -2   0  13   -3.08    7.65   0  0.14715
  -2   1 -11 1161.25   10.70   0  0.15105
  -2   1  18   22.08    7.05   0  0.17365
  -2   2 -15    9.42    5.36   0  0.16069
  -2   2  21  300.08    5.84   0  0.19076
  -2   3 -17   10.27    6.93   0  0.17785
  -2   3  24    5.72    7.05   0  0.20448
  -1   0  -4  494.57   13.58   0  0.12337
  -1   0  10   88.72    6.47   0  0.12764
  -1   0  11    0.24    8.25   0  0.13417
  -1   1 -10 1845.01   12.92   0  0.14452
  -1   1  16  447.23    8.57   0  0.16266
  -1   2 -14   18.44    5.43   0  0.15584
  -1   2  20 1197.76    9.22   0  0.18607
  -1   3 -16  115.17    7.04   0  0.17474
  -1   3  23    9.48    6.79   0  0.20403
  -1   4 -18  427.30    8.01   0  0.18692
  -1   6 -21    3.59    7.26   0  0.20180
   0   0   5   21.22    9.86   0  0.09866
   0   0   6 2722.59   22.81   0  0.10296
   0   1  14    5.73    7.52   0  0.15095
   0   2  18  490.23    8.10   0  0.17479
   0   3 -15    6.67    6.87   0  0.16986
   0   3  21    5.03    7.09   0  0.19114
   0   4  23    0.62    7.28   0  0.20140
   0   5 -19   72.81    6.89   0  0.19300
   1   1  -6  686.66   13.94   0  0.12619
   1   1  11  250.05    9.20   0  0.13199
   1   2 -11  820.37   11.14   0  0.14067
   1   2  16 1214.01    9.89   0  0.16174
   1   3 -14 2900.93   14.69   0  0.16373
   1   3  19   61.61    7.02   0  0.18099
   1   4  21    2.30    4.99   0  0.19286
   1   4  22  537.67    7.90   0  0.20026
   1   5 -18  441.87    8.26   0  0.18831
   1   5  23   17.70    5.11   0  0.20266
   2   1   6 1112.14   15.51   0  0.09878
   2   1   7  965.47   14.12   0  0.10406
   2   2  13  269.19    6.65   0  0.14348
   2   2  14 1732.84   11.27   0  0.15078
   2   3  17    3.24    7.39   0  0.16878
   2   4 -15   11.37    7.25   0  0.17003
   2   4  20  943.29    8.82   0  0.18961
   2   5 -17   17.91    7.09   0  0.17962
   2   5  21   21.82    5.19   0  0.19372
   2   5  22  440.62    8.07   0  0.20125
   3   2   9   25.62    6.70   0  0.11589
   3   2  10   42.19    9.35   0  0.12305
   3   3 -10 1981.90   18.64   0  0.14486
   3   3  14 1898.86   10.22   0  0.14853
   3   3  15   27.35    7.58   0  0.15594
   3   4 -13    5.68    8.70   0  0.16266
   3   4  17   19.77    5.32   0  0.17014
   3   4  18  788.28    8.82   0  0.17767
   3   5  19    4.48    5.26   0  0.18322
   3   5  20  815.85    8.95   0  0.19065
   3   6 -17    7.86    6.91   0  0.18549
   3   7 -18  254.39   10.18   0  0.19219
   4   3  10 1759.23   11.56   0  0.12060
   4   3  11   -2.58    8.78   0  0.12765
   4   4 -11   80.45    9.84   0  0.15007
   4   4  14  318.31    6.71   0  0.14848
   4   4  15    3.57    8.02   0  0.15582
   4   5  17   16.26    7.61   0  0.17040
   4   6 -15    1.85    8.41   0  0.18169
   4   6  19   18.26    7.75   0  0.18334
   5   3  -2  723.18   17.25   0  0.09886
   5   3  -1   54.42   11.92   0  0.09183
   5   3   0 4254.79   27.70   0  0.08599
   5   3   1  126.83   13.21   0  0.08327
   5   3   2 2497.77   21.12   0  0.08465
   5   3   3    6.49   12.06   0  0.08867
   5   3   4 1506.86   16.87   0  0.08943
   5   3   5   84.99   11.92   0  0.09360
   5   4  10  154.92    7.29   0  0.11841
   5   4  11  629.64   10.58   0  0.12586
   5   5  14   88.57    8.41   0  0.14906
   5   6 -13   -0.55   10.74   0  0.16708
   5   6  16   35.96    8.28   0  0.16493
   6   4  -2 1082.83   19.09   0  0.09449
   6   4  -1  126.63   13.10   0  0.08730
   6   4   0   46.59   13.42   0  0.08126
   6   4   1  320.43   14.90   0  0.07947
   6   4   2 1252.83   17.92   0  0.08106
   6   4   3  149.99   13.25   0  0.08297
   6   4   4  457.78   13.78   0  0.08743
   6   4   5  446.22   13.53   0  0.08993
   6   5   9   13.23    7.74   0  0.10737
   6   5  10  332.42   10.95   0  0.11519
   6   6  12  175.73    7.25   0  0.13296
   6   6  13   -1.71    9.03   0  0.14123
   6   7  14  281.25    9.99   0  0.15127
   6   7  15  105.13    9.19   0  0.15909
   6   8 -13    8.17   12.83   0  0.18333
   7   6   7    5.55   13.77   0  0.08818
   7   6   8  669.52   15.16   0  0.09199
   7   7  10   59.05   11.76   0  0.11244
   7   7  11    0.29   10.97   0  0.12224
   8   7  -2  153.97   14.69   0  0.10747
   8   7  -1    7.49   15.37   0  0.09740
   8   7   0  574.46   15.54   0  0.09382
   8   7   1  224.12   15.02   0  0.08725
   8   7   2   31.28   14.49   0  0.08527
   8   7   3   35.65   15.16   0  0.08380
   8   7   4  658.85   19.96   0  0.08406
   8   8  -6   99.13   13.91   0  0.14107
   8   8  -5   84.22   12.81   0  0.12987
   8   8   5   99.37   16.21   0  0.08542
   8   8   6  217.56   16.39   0  0.08708
   8   8   7  127.93   16.01   0  0.08915
 -14   0  -5   -6.34   11.47   0  0.12770
 -14   0  -4  158.96   11.83   0  0.12620
 -13  -1   1  237.61   13.42   0  0.10534
 -13  -1   2  738.21   15.27   0  0.10681
 -13  -1   3   62.48   15.95   0  0.10559
 -13  -1   4  591.01   17.63   0  0.10379
 -13  -1   5  141.15   16.22   0  0.10587
 -13  -1   6 1630.10   21.03   0  0.10881
 -13  -1   7   16.66   15.00   0  0.11289
 -13  -1   8   43.56   14.30   0  0.11844
 -13  -1   9  190.80   14.81   0  0.12435
 -13   0  -7   -3.88   10.43   0  0.13502
 -13   0  -6 1644.92   14.51   0  0.13370
 -12  -1  -2  335.00   12.03   0  0.11381
 -12  -1  -1   49.26   10.86   0  0.11461
 -12  -1   0  412.70   14.60   0  0.11348
 -12  -1  11  349.95   18.52   0  0.13593
 -12   0  -8  269.53   10.56   0  0.13601
 -12   0  19    0.79   14.03   0  0.17779
 -12   1 -12  155.82    9.88   0  0.15270
 -11  -1  -3  243.55   10.97   0  0.11735
 -11  -1  -2  149.65   10.51   0  0.11911
 -11  -1  12  752.71   24.28   0  0.14223
 -11   0  -9    4.09    8.93   0  0.14404
 -11   1 -13  101.41    6.77   0  0.15556
 -10  -1  -4  713.28   11.86   0  0.12070
 -10   0 -10    4.03    6.27   0  0.14221
 -10   1 -13    5.47    8.27   0  0.15948
 -10   2 -16  423.07    9.53   0  0.16892
  -9  -1  -5  239.51   10.09   0  0.12341
  -9  -1  -4 1353.18   12.76   0  0.12537
  -9   0 -10 2575.76   13.70   0  0.14602
  -9   1 -14  248.71    8.89   0  0.15767
  -9   1  23    5.73    9.51   0  0.19935
  -9   2 -17    2.03    6.02   0  0.16904
  -8  -1  -5  189.45    9.88   0  0.12358
  -8  -1  14 2590.04   25.38   0  0.15349
  -8   0 -11   -2.16    5.73   0  0.14505
  -8   0 -10  191.17    8.42   0  0.14671
  -8   0  19    2.06    8.05   0  0.17579
  -8   1 -14  565.65    9.23   0  0.16015
  -8   1  23   98.83    9.36   0  0.19890
  -8   2 -17  167.66    8.69   0  0.16872
  -7  -1  -5  631.36   11.03   0  0.12304
  -7   0 -11    0.71    5.77   0  0.14469
  -7   0  19    0.23    9.12   0  0.18158
  -7   1 -14   13.52    7.72   0  0.16011
  -7   1  22  479.49    8.96   0  0.19063
  -7   2 -17    6.94    7.69   0  0.17189
  -7   3 -19    8.80    7.57   0  0.18349
  -6  -1  -5  188.99    9.57   0  0.12147
  -6  -1  -4 1913.46   14.44   0  0.12374
  -6   0 -11  -11.60    5.92   0  0.14381
  -6   0  18 3284.23   15.94   0  0.17309
  -6   1 -14  747.51    9.34   0  0.15886
  -6   1  22   29.04    8.86   0  0.19429
  -6   2 -17  219.31    8.22   0  0.16791
  -6   3 -19    2.84    7.55   0  0.18343
  -5  -1  -4   69.77    9.50   0  0.11673
  -5  -1  11   42.55   10.84   0  0.13554
  -5   0 -10 3167.45   14.34   0  0.14426
  -5   0  17   16.81    7.60   0  0.16532
  -5   1 -14  162.32    8.14   0  0.15500
  -5   1  21  241.45    7.69   0  0.18982
  -5   2 -17   38.22    7.47   0  0.16691
  -5   2  24  840.72    9.16   0  0.20429
  -5   3 -19   36.98    7.62   0  0.18065
  -5   4 -21    9.32    7.73   0  0.18999
  -4  -1  -2  760.15   13.25   0  0.11440
  -4  -1   9   15.10   12.68   0  0.12304
  -4   0 -10 4366.54   15.75   0  0.13856
  -4   0  16 1020.74   10.58   0  0.16359
  -4   1 -14 1223.09    9.02   0  0.15273
  -4   1  20 2159.98   11.62   0  0.18476
  -4   2 -17  115.75    5.69   0  0.16451
  -4   2  23  107.43    7.43   0  0.19990
  -4   3 -19   28.07    7.50   0  0.17801
  -4   3  25    6.05    7.29   0  0.20681
  -4   4 -21   55.47    5.54   0  0.18908
  -3   0  -9    2.70    5.95   0  0.13362
  -3   0  14   31.37    7.78   0  0.15043
  -3   1 -13  449.69    8.80   0  0.14885
  -3   1  19    5.26    7.05   0  0.18018
  -3   2 -16  385.40    8.26   0  0.16350
  -3   2  22  140.88    7.35   0  0.19565
  -3   3  24  241.39    7.60   0  0.20124
  -3   4 -20   57.18    7.13   0  0.18995
  -2   0  -7   50.02    8.97   0  0.13016
  -2   0  12 1515.93   12.97   0  0.13928
  -2   1 -12 4086.08   15.96   0  0.14736
  -2   1  17   28.22    7.25   0  0.16580
  -2   2  20  300.64    5.82   0  0.18296
  -2   3 -18 1522.89   10.85   0  0.17255
  -2   3  23   22.00    7.18   0  0.19736
  -2   5 -21   11.75    7.20   0  0.19618
  -1   0  -5   23.91   11.62   0  0.11477
  -1   1 -11  239.85    8.92   0  0.13869
  -1   1  15    8.75    5.56   0  0.15477
  -1   2  19  188.81    7.42   0  0.17836
  -1   3 -17   39.19    7.24   0  0.17026
  -1   3  22 1130.46    9.09   0  0.19646
  -1   4 -19  143.13    7.40   0  0.18411
  -1   4  24  307.91    7.70   0  0.20637
   0   0   3   23.80   11.87   0  0.09143
   0   0   4 9999.00   49.22   0  0.09440
   0   1  -9  612.82   10.48   0  0.13420
   0   1  13   25.99    7.81   0  0.14374
   0   2 -13  773.66   10.02   0  0.15062
   0   2  17  305.70    7.88   0  0.16695
   0   3 -16  419.81    8.41   0  0.16643
   0   3  20   52.15    7.13   0  0.18354
   0   4 -18  343.86    7.87   0  0.18043
   0   4  22   62.76    7.28   0  0.19380
   0   5 -20  176.81    7.78   0  0.18609
   0   6 -21    7.96    7.21   0  0.19716
   1   1  10 1988.08   14.24   0  0.12487
   1   2  15  571.69    8.79   0  0.15469
   1   3  18 1236.69    9.49   0  0.17334
   1   4 -17   66.69    7.14   0  0.17477
   1   4  20  611.90    6.63   0  0.18466
   1   5 -19   -0.35    7.26   0  0.18163
   1   5  22   11.07    7.35   0  0.19479
   1   6 -20   22.49    7.29   0  0.19319
   2   1   3 2301.12   21.94   0  0.08934
   2   1   4 1151.56   18.43   0  0.09126
   2   1   5 1443.29   17.72   0  0.09664
   2   2  -9  232.90   11.34   0  0.13044
   2   2  12 1160.81   11.07   0  0.13610
   2   3 -13   22.15    7.76   0  0.14807
   2   3  16  176.09    7.75   0  0.16232
   2   4  18   78.94    5.38   0  0.17427
   2   4  19    1.36    7.24   0  0.18056
   2   5  20  101.13    5.63   0  0.18570
   2   6 -19   37.96    7.39   0  0.18685
   2   7 -20  285.73    8.80   0  0.19458
   3   2   8 2808.30   16.93   0  0.10847
   3   3  13   38.98    8.29   0  0.14076
   3   4  16  544.07    8.68   0  0.16224
   3   5 -16    6.19    7.25   0  0.16996
   3   5  18   23.07    7.47   0  0.17507
   3   6  20   64.10    7.94   0  0.18749
   4   3   9   -1.34    9.75   0  0.11328
   4   4  13  130.30    8.56   0  0.14047
   4   5  15  178.34    6.06   0  0.15683
   4   5  16  209.22    8.15   0  0.16449
   4   6  17   -3.54    5.61   0  0.17059
   4   6  18   74.35    7.88   0  0.17850
   4   7 -17    1.70    9.54   0  0.17844
   5   4   9  194.72   10.65   0  0.11098
   5   5  12 1212.22    9.69   0  0.13358
   5   5  13  274.87    9.18   0  0.14126
   5   6  14 1326.76    9.51   0  0.15061
   5   6  15   41.90    8.49   0  0.15852
   5   7  16  495.57    9.71   0  0.16504
   6   5   7  801.28   11.91   0  0.09019
   6   5   8 1301.69   14.93   0  0.09922
   6   6  11   53.57   10.05   0  0.12473
   6   7  13   28.68    9.55   0  0.14363
   7   6  -6   50.91   14.56   0  0.12697
   7   6   4 1242.06   19.07   0  0.07580
   7   6   5   66.68   14.60   0  0.07996
   7   6   6 1483.05   18.13   0  0.08388
   7   7   8  921.35   16.26   0  0.09424
   7   7   9   70.15   13.17   0  0.10235
   7   8  10  193.95   12.53   0  0.11673
   8   8  -4   18.03   13.93   0  0.11759
   8   8  -3    7.29   14.48   0  0.11101
   8   8  -2  257.38   14.13   0  0.10086
   8   8  -1  108.39   14.56   0  0.09236
   8   8   0   26.47   14.91   0  0.08866
   8   8   1   48.89   15.20   0  0.08680
   8   8   2  332.45   16.38   0  0.08686
   8   8   3  148.04   15.87   0  0.08670
   8   8   4  202.60   19.77   0  0.08545
 -14  -1   2  359.58   15.70   0  0.09748
 -14  -1   3  164.71   14.85   0  0.09847
 -14  -1   4  364.88   15.40   0  0.10133
 -14  -1   5  101.28   14.06   0  0.10317
 -14  -1   6   45.80   13.37   0  0.10747
 -13  -1  -2  116.90   12.43   0  0.10915
 -13  -1  -1  142.64   12.73   0  0.10860
 -13  -1   0 1221.40   16.07   0  0.10745
 -13   0  -8   76.46   10.64   0  0.13485
 -12  -1  -4   45.74   11.06   0  0.11591
 -12  -1  -3   24.57   10.97   0  0.11627
 -12   0 -10   49.12    7.17   0  0.13942
 -12   0  -9    0.24    9.90   0  0.13773
 -11  -1  -5  123.11   10.91   0  0.11950
 -11  -1  -4 1574.64   14.47   0  0.11995
 -11   0 -10 1280.17   12.07   0  0.14248
 -11   0  19    2.13   11.87   0  0.17450
 -11   1 -15    6.53    6.47   0  0.15803
 -11   1 -14  505.73   10.55   0  0.15574
 -10  -1  -6  344.73   10.92   0  0.12281
 -10  -1  -5  225.90   10.41   0  0.12339
 -10   0 -11    1.92    8.99   0  0.14364
 -10   0  19    3.16    9.92   0  0.17554
 -10   1 -15  150.43    6.65   0  0.15800
 -10   1 -14  314.77    9.24   0  0.15804
  -9  -1  -6  327.43   10.21   0  0.12583
  -9  -1  14    6.15   15.66   0  0.15224
  -9   0 -12  187.77    6.66   0  0.14512
  -9   0 -11    5.91    8.43   0  0.14459
  -9   0  19    7.36    9.71   0  0.17583
  -9   1 -15    2.08    8.50   0  0.15878
  -9   2 -18  165.43    6.66   0  0.16904
  -8  -1  -7  343.56    7.89   0  0.12573
  -8  -1  -6  208.13    9.90   0  0.12626
  -8   0 -12  412.21    9.43   0  0.14493
  -8   1 -15  259.19    8.88   0  0.15941
  -8   1  22  212.84    8.31   0  0.19038
  -8   2 -18  437.31    9.48   0  0.16865
  -7  -1  -7  176.40    7.20   0  0.12503
  -7  -1  -6 1478.30   12.95   0  0.12572
  -7  -1  13  270.33   13.68   0  0.14710
  -7   0 -12   14.80    8.08   0  0.14532
  -7   0  18  120.92    8.34   0  0.17075
  -7   1 -15    5.13    8.05   0  0.15831
  -7   2 -18  524.25    9.24   0  0.16918
  -7   2  24  780.12    9.70   0  0.19818
  -7   3 -20  122.34    8.19   0  0.18221
  -6  -1  -6    5.44    9.16   0  0.12034
  -6  -1  12  450.85   14.52   0  0.14114
  -6   0 -12  688.08    7.91   0  0.14372
  -6   1 -15  222.25    8.28   0  0.15709
  -6   1  21   18.07    7.47   0  0.18660
  -6   2 -18  178.88    8.27   0  0.16776
  -6   2  24   65.40    7.37   0  0.20039
  -6   3 -20  408.52    8.79   0  0.18208
  -5  -1  -5  472.94   10.91   0  0.11840
  -5   0 -11   -0.98    8.07   0  0.14293
  -5   1 -15    6.16    7.92   0  0.15381
  -5   1  20    4.98    7.28   0  0.18031
  -5   2 -18  570.16    8.98   0  0.16569
  -5   2  23  116.02    7.51   0  0.19625
  -5   3 -20  227.49    8.20   0  0.17985
  -5   3  25    5.88    7.52   0  0.20560
  -4  -1  -4 2733.94   16.95   0  0.11027
  -4  -1  -3  113.12   10.27   0  0.11165
  -4   0 -11   -0.31    5.99   0  0.13796
  -4   0  15    6.14    7.62   0  0.15545
  -4   1 -15  143.34    5.89   0  0.15221
  -4   1  19  204.25    7.85   0  0.17613
  -4   2  22  773.71    9.00   0  0.19104
  -4   3 -20  274.09    8.11   0  0.17796
  -4   3  24   74.96    7.45   0  0.19922
  -3  -1   1  340.21   16.22   0  0.09564
  -3   0 -10 2742.21   13.45   0  0.13304
  -3   1 -14  371.60    8.60   0  0.14829
  -3   1  18 1297.27   10.42   0  0.17224
  -3   2 -17  101.12    7.85   0  0.16024
  -3   2  21    9.09    7.27   0  0.18657
  -3   3 -19   13.15    7.11   0  0.17708
  -3   3  23   34.46    7.20   0  0.19491
  -3   4 -21    2.12    7.32   0  0.18569
  -2   0  -8 3465.60   17.93   0  0.12667
  -2   1 -13   52.21    8.16   0  0.14341
  -2   1  16 2356.40   12.74   0  0.16044
  -2   2 -16 1075.76   10.08   0  0.15943
  -2   3 -19    8.14    7.52   0  0.17235
  -2   3  22  696.30    8.59   0  0.19128
  -2   4  24  510.56    8.33   0  0.20203
  -2   5 -22  295.06    8.52   0  0.19368
  -1   0  -6  425.94   12.93   0  0.11328
  -1   0   9    5.14    8.91   0  0.12054
  -1   1 -12  453.17    7.55   0  0.13816
  -1   1  14 1419.00    9.86   0  0.14972
  -1   2 -15  518.41    9.16   0  0.15407
  -1   2  18  108.15    7.41   0  0.17207
  -1   3 -18  998.78    9.92   0  0.16819
  -1   3  21    6.06    7.04   0  0.18681
  -1   4 -20  438.91    8.69   0  0.17952
  -1   4  23   42.51    7.28   0  0.19839
  -1   5 -21   64.22    7.50   0  0.19049
   0   0   2  169.94   21.78   0  0.08851
   0   1 -10 1169.44   12.44   0  0.12843
   0   1  12 4219.86   17.10   0  0.13859
   0   2 -14 1137.87   11.05   0  0.14497
   0   2  16  728.25    8.72   0  0.16133
   0   3 -17   50.51    7.49   0  0.16338
   0   3  19    6.04    6.93   0  0.17903
   0   4 -19   38.68    7.34   0  0.17541
   0   4  21  133.54    7.47   0  0.18769
   0   5  23  150.17    7.79   0  0.19945
   1   1  -7    8.95   10.09   0  0.11760
   1   1   9 1296.86   13.57   0  0.11879
   1   2 -12 3347.99   17.43   0  0.13865
   1   2  14   32.27    7.71   0  0.14875
   1   3 -15  -11.36    9.16   0  0.15677
   1   3  17   13.39    7.24   0  0.16814
   1   4 -18  127.76    7.71   0  0.17076
   1   4  19  188.10    5.63   0  0.17878
   1   5  21  104.96    7.53   0  0.18878
   1   6 -21   -0.84    7.53   0  0.18930
   2   1  -1 1048.32   28.30   0  0.09143
   2   1   0 1244.84   25.92   0  0.08313
   2   1   1  661.61   20.05   0  0.08459
   2   1   2 7060.89   40.25   0  0.08724
   2   2  11   14.03    8.65   0  0.13007
   2   3  15   34.69    7.68   0  0.15527
   2   4 -16   71.10    7.60   0  0.16542
   2   4  17   31.81    7.34   0  0.16825
   2   5 -18   13.97    7.30   0  0.17651
   2   5  19   91.06    7.58   0  0.17964
   3   2   6 1245.86   15.56   0  0.09655
   3   2   7  929.88   13.85   0  0.10134
   3   3 -11    4.53   10.21   0  0.13469
   3   3  12   49.70    8.38   0  0.13595
   3   4 -14  429.97   11.02   0  0.15516
   3   4  15  247.09    8.20   0  0.15629
   3   5  17  193.68    8.01   0  0.16914
   3   6 -18   55.17    9.28   0  0.17882
   3   6  18  856.53    7.67   0  0.17598
   3   6  19   -0.45    7.80   0  0.18108
   3   7 -19    2.45    9.53   0  0.18519
   4   3   7  218.06    8.35   0  0.10142
   4   3   8 1192.76   13.40   0  0.10631
   4   4  11   10.58    6.31   0  0.12824
   4   4  12 1541.93   11.83   0  0.13387
   4   5 -14  690.37   13.70   0  0.16143
   4   5  14  455.73    8.92   0  0.15104
   4   6 -16  188.39   10.11   0  0.17009
   4   6  16  213.27    8.45   0  0.16447
   4   7  17   34.33    5.96   0  0.17160
   5   4   7  620.26   13.28   0  0.09865
   5   4   8 2226.69   16.08   0  0.10361
   5   5 -11   16.73   12.91   0  0.15695
   5   5  11  154.69    9.76   0  0.12709
   5   6  13   27.21    8.90   0  0.14479
   5   7 -15   11.04   11.18   0  0.17183
   5   7  15    8.18    8.72   0  0.15990
   5   8 -16   39.56   11.20   0  0.17966
   6   5   5    9.39   13.72   0  0.08170
   6   5   6  133.85   13.64   0  0.08491
   6   6   9   28.48   11.20   0  0.10924
   6   6  10  817.83   12.42   0  0.11585
   6   7  11  106.31   10.34   0  0.13004
   6   7  12  166.30   10.25   0  0.13597
   7   6  -5    5.64   15.05   0  0.10993
   7   6  -4  851.81   18.48   0  0.09902
   7   6  -3   23.97   12.75   0  0.08903
   7   6  -1   24.17   15.32   0  0.07348
   7   6   0 1023.09   19.60   0  0.07268
   7   6   1   15.69   15.85   0  0.07217
   7   6   2  170.39   16.54   0  0.07201
   7   6   3    8.36   15.83   0  0.07360
   7   7   6  334.75   16.61   0  0.07861
   7   7   7   12.94   15.08   0  0.08500
   7   8   8  178.63   14.16   0  0.09995
   7   8   9   31.07   12.81   0  0.10888
   8   9  -3    1.80   13.42   0  0.10673
 -14  -1  -2  315.50   14.67   0  0.10430
 -14  -1  -1   34.08   13.99   0  0.10119
 -14  -1   0   92.22   14.09   0  0.10211
 -14  -1   1   62.84   17.52   0  0.09964
 -14  -1   7  181.08   16.48   0  0.11343
 -14  -1   8  506.48   17.62   0  0.11882
 -13  -1  -4 1043.10   15.18   0  0.11157
 -13  -1  -3  208.86   12.54   0  0.11155
 -13  -1  10 1674.43   25.47   0  0.12963
 -13   0  -9    6.90   10.63   0  0.13559
 -12  -1  -6  627.30   10.09   0  0.11874
 -12  -1  -5   33.80   11.15   0  0.11851
 -12   0 -11    1.49    9.92   0  0.14101
 -11  -1  -7   33.70   10.59   0  0.12239
 -11  -1  -6   37.49   10.27   0  0.12237
 -11   0 -12  276.77   10.31   0  0.14293
 -11   0 -11    1.76    9.64   0  0.14057
 -10  -1  -8   88.67    7.14   0  0.12609
 -10  -1  -7  152.24    9.92   0  0.12570
 -10   0 -13   -1.67    6.53   0  0.14548
 -10   0 -12  251.86    9.70   0  0.14514
 -10   1 -16  149.44    9.43   0  0.15830
 -10   1  22  233.01   10.87   0  0.18962
  -9  -1  -8 1712.50   13.48   0  0.12598
  -9  -1  -7  193.38   10.05   0  0.12589
  -9   0 -13    1.26    8.51   0  0.14631
  -9   1 -16  715.21   10.26   0  0.15959
  -9   1  22  244.31   10.43   0  0.18934
  -8  -1  -8  656.19   10.93   0  0.12544
  -8   0 -13   -2.69    8.23   0  0.14612
  -8   0  18 1808.74   15.28   0  0.17053
  -8   1 -17   18.08    6.09   0  0.15945
  -8   1 -16   38.45    8.45   0  0.15888
  -8   2 -19   -0.99    8.42   0  0.16969
  -8   2  24   -6.71    7.85   0  0.19727
  -7  -1  -8 2143.36   14.00   0  0.12465
  -7   0 -13    1.78    8.34   0  0.14703
  -7   1 -17  190.01    6.66   0  0.15853
  -7   1 -16 1361.75   11.18   0  0.15799
  -7   1  21  304.22    8.42   0  0.18503
  -7   2 -19  106.08    8.43   0  0.16991
  -6  -1  -8 1210.04   10.31   0  0.12362
  -6  -1  -7  299.02   10.00   0  0.12372
  -6   0 -13    9.98    8.24   0  0.14600
  -6   0  17   -1.52    9.78   0  0.16489
  -6   1 -17   -1.79    5.77   0  0.15727
  -6   1 -16   29.67    8.13   0  0.15658
  -6   1  20 1829.61   12.08   0  0.17859
  -6   2 -19   28.24    7.97   0  0.16824
  -6   2  23   42.73    7.45   0  0.19472
  -6   3 -21   -3.46    8.00   0  0.18049
  -5  -1  -7   32.55    6.78   0  0.11830
  -5  -1  -6 3120.59   16.92   0  0.11893
  -5  -1  10   63.96   12.83   0  0.12978
  -5   0 -13   -2.25    6.02   0  0.14254
  -5   0 -12  525.59    9.41   0  0.14264
  -5   0  16  289.52   10.30   0  0.16039
  -5   1 -16 1462.07   11.05   0  0.15517
  -5   1  19   13.09    7.41   0  0.17439
  -5   2 -19  160.14    8.31   0  0.16611
  -5   2  22    5.27    7.18   0  0.18927
  -5   3 -21    3.94    7.84   0  0.17933
  -5   3  24   30.88    7.47   0  0.19690
  -4  -1  -5  348.71   11.63   0  0.10900
  -4  -1   8  274.25   15.66   0  0.11755
  -4   0 -12  245.31    6.89   0  0.13789
  -4   1 -16  622.73    7.35   0  0.15250
  -4   1  18  184.46    7.82   0  0.17026
  -4   2 -19   32.04    5.62   0  0.16541
  -4   2 -18   12.18    7.63   0  0.16442
  -4   2  21  148.21    7.61   0  0.18365
  -4   3 -21    7.94    5.38   0  0.17835
  -4   3  23   20.24    7.48   0  0.19319
  -4   4 -22  137.18    8.04   0  0.18866
  -3  -1  -2 1731.19   18.40   0  0.09613
  -3  -1  -1  594.23   16.14   0  0.09785
  -3  -1   0  753.24   20.53   0  0.09482
  -3  -1   2  279.12   21.66   0  0.09441
  -3   0 -11    0.51    6.07   0  0.13257
  -3   0  13    4.23    7.59   0  0.14540
  -3   1 -15   16.97    7.88   0  0.14818
  -3   1  17  436.01    8.48   0  0.16617
  -3   2 -18  423.11    8.91   0  0.16103
  -3   2  20 2500.28   12.08   0  0.18070
  -3   3 -20  361.28    8.50   0  0.17691
  -3   3  22 1677.53   10.51   0  0.18916
  -3   4 -22  344.59    8.59   0  0.18594
  -3   4  24  598.11    8.69   0  0.19795
  -2   0  -9   25.57    9.07   0  0.12636
  -2   0  11   36.68   10.19   0  0.13460
  -2   1 -14  280.95    8.76   0  0.14321
  -2   1  15  437.28    7.03   0  0.15466
  -2   2 -17  164.69    8.11   0  0.15894
  -2   2  19   53.16    7.25   0  0.17718
  -2   3  21    6.44    7.09   0  0.18522
  -2   4 -21   76.02    7.73   0  0.18403
  -2   4  23   39.69    7.34   0  0.19469
  -1   0  -7   -2.67    7.80   0  0.11223
  -1   0   8 1664.93   16.54   0  0.11627
  -1   2 -16 1089.72   10.46   0  0.15323
  -1   2  17   10.98    7.36   0  0.16530
  -1   3 -19   46.98    5.62   0  0.16858
  -1   3  20  121.52    7.38   0  0.18264
  -1   4 -21    8.75    5.30   0  0.17969
  -1   4  22  683.56    8.61   0  0.19216
  -1   5 -22    7.75    7.52   0  0.18922
  -1   5  23    9.18    7.57   0  0.19506
   0   1 -11  765.44    9.53   0  0.12795
   0   1  11  754.11   10.57   0  0.13306
   0   2 -15    9.55    5.59   0  0.14472
   0   2  15    6.37    7.27   0  0.15534
   0   3  18  961.13    8.98   0  0.17243
   0   4 -20  560.11    7.56   0  0.17551
   0   4  20  810.68    8.64   0  0.18180
   0   5 -21   66.16    7.59   0  0.18555
   0   5  22  319.90    7.89   0  0.19342
   1   1  -8  914.40   14.69   0  0.11225
   1   1   8   11.24    9.90   0  0.11409
   1   2 -13   21.92    8.64   0  0.13427
   1   2  13   45.52    8.16   0  0.14305
   1   3 -16   22.20    7.32   0  0.15779
   1   3  16  101.47    7.44   0  0.16186
   1   4  18  515.18    8.34   0  0.17283
   1   5 -20  402.82    8.84   0  0.18105
   1   5  20  899.82    9.11   0  0.18276
   1   6  21    3.74    5.50   0  0.18842
   2   2 -10  623.06   13.59   0  0.12362
   2   2  10 3197.18   16.04   0  0.12497
   2   3 -14  270.64   10.53   0  0.14692
   2   3  13  102.18    5.98   0  0.14402
   2   3  14  679.27    9.30   0  0.14962
   2   4 -17  323.19    8.75   0  0.16182
   2   4  16 1190.06    9.91   0  0.16262
   2   5 -19   87.13    7.79   0  0.17354
   2   5  18  431.43    8.31   0  0.17373
   2   6 -20    7.27    9.21   0  0.18319
   2   6  19   61.20    5.68   0  0.17967
   2   6  20  285.41    8.38   0  0.18557
   3   2   5   38.30   12.58   0  0.08985
   3   3  10 3150.86   14.22   0  0.12454
   3   3  11   62.04    8.91   0  0.12949
   3   4  13   45.37    5.80   0  0.14469
   3   4  14  427.69    8.91   0  0.15038
   3   5 -17   81.17    7.84   0  0.16763
   3   5  16  913.25    9.44   0  0.16382
   3   6  17    3.77    5.46   0  0.16982
   3   7  18    4.41    5.70   0  0.17601
   4   3   6  245.01   11.81   0  0.09550
   4   4 -12  400.26   12.89   0  0.13791
   4   4  10  736.89   10.81   0  0.12299
   4   5  13   14.59    8.27   0  0.14462
   4   6  15   47.36    8.00   0  0.15872
   4   7 -18   29.05    9.91   0  0.17592
   4   7  16  105.77    8.60   0  0.16547
   5   4   5  558.47   14.81   0  0.08435
   5   4   6  130.74   12.89   0  0.08928
   5   5   9  315.40   10.86   0  0.11483
   5   5  10  736.57   11.46   0  0.11985
   5   6  11    3.69    6.50   0  0.13204
   5   6  12  122.96    9.26   0  0.13796
   5   7  13   57.04    8.99   0  0.14728
   5   7  14   10.66    8.83   0  0.15323
   6   5   3  519.43   16.26   0  0.07609
   6   5   4  985.87   17.22   0  0.07908
   6   6   7  102.52   12.60   0  0.09712
   6   6   8   77.40   11.90   0  0.10244
   6   7   9   60.77   10.85   0  0.11627
   6   7  10   91.09   10.65   0  0.12174
   6   8  11   63.89   10.71   0  0.13256
   7   6  -2   24.36   17.42   0  0.07924
   7   7  -8  203.46   16.74   0  0.12972
   7   7   3    9.41   15.58   0  0.07509
   7   7   4  201.31   16.63   0  0.07501
   7   7   5   51.69   19.99   0  0.07550
   7   8   5    7.09   16.37   0  0.07987
   7   8   6  110.05   16.00   0  0.08493
   7   8   7   79.94   15.16   0  0.09102
 -14  -1  -4    7.39   12.62   0  0.11363
 -14  -1  -3  134.34   13.50   0  0.10730
 -14  -1   9   34.44   16.68   0  0.12410
 -13  -1  -6    9.82   11.46   0  0.12122
 -13  -1  -5   18.47   11.72   0  0.11578
 -13  -1  11   45.94   17.44   0  0.13431
 -12  -1  -8   -2.20    7.27   0  0.12974
 -12  -1  -7   72.47   10.98   0  0.12361
 -12   0 -12   80.04   10.28   0  0.14340
 -12   0  18   19.93   14.44   0  0.16855
 -11  -1  -9   76.50    7.28   0  0.13346
 -11  -1  -8 1136.58   12.92   0  0.12710
 -11   0 -13    0.27    9.41   0  0.14888
 -10  -1  -9   30.57    9.27   0  0.13346
 -10   0 -14   49.09    8.98   0  0.15369
  -9  -1 -10    5.71    6.46   0  0.13685
  -9  -1  -9  170.38    9.63   0  0.12946
  -9   0 -14 1357.43   11.68   0  0.15085
  -9   0  18  268.46   10.85   0  0.16880
  -9   1 -18  482.21    7.66   0  0.16837
  -9   1 -17   75.72    9.12   0  0.16016
  -9   1  21  159.02    8.44   0  0.18416
  -8  -1 -10  537.64    7.94   0  0.13634
  -8  -1  -9   12.37    8.96   0  0.13088
  -8  -1  13   56.85   13.97   0  0.14572
  -8   0 -14   21.25    8.70   0  0.14839
  -8   1 -18  280.60    6.82   0  0.16764
  -8   1  21   61.64    9.72   0  0.18300
  -8   2  23    2.97    7.76   0  0.19320
  -7  -1 -10  355.20    7.33   0  0.13558
  -7  -1  -9  631.38   10.37   0  0.12841
  -7   0 -14 2218.51   12.79   0  0.14785
  -7   0  17    4.62    9.55   0  0.16511
  -7   1 -18  299.43    6.69   0  0.16653
  -7   1  20  165.54    8.16   0  0.18008
  -7   2 -21    0.84    5.69   0  0.17922
  -7   2 -20  113.47    8.56   0  0.17088
  -7   2  23  100.73    7.85   0  0.19227
  -6  -1  -9   -5.46    8.72   0  0.12904
  -6   0 -14  320.99    8.82   0  0.15096
  -6   0  16 2975.37   16.38   0  0.16054
  -6   1 -18  465.69    7.06   0  0.16545
  -6   2 -20  681.12    9.60   0  0.17180
  -6   2  22  562.08    8.75   0  0.18906
  -6   3  24  167.23    7.89   0  0.19758
  -5  -1  -8 1087.56   11.73   0  0.12509
  -5   0 -14 3059.34   12.44   0  0.15029
  -5   0  15    4.32    7.63   0  0.15607
  -5   1 -17  222.08    8.34   0  0.15717
  -5   2 -20   17.33    7.95   0  0.17480
  -5   2  21   57.81    7.43   0  0.18512
  -5   3 -22   11.15    7.71   0  0.18582
  -5   3  23   23.84    5.40   0  0.19410
  -4  -1  -7  520.21    8.78   0  0.11937
  -4  -1  -6  278.09   11.07   0  0.11288
  -4   0 -13   -2.89    8.07   0  0.14351
  -4   0  14 2830.23   16.96   0  0.14980
  -4   1 -17   51.98    5.54   0  0.16037
  -4   2  20   69.22    7.40   0  0.18090
  -4   3 -22  563.64    7.28   0  0.18641
  -4   4  24  193.20    7.93   0  0.19854
  -3  -1  -4  107.66    8.54   0  0.10494
  -3  -1  -3   26.42   12.19   0  0.09945
  -3  -1   3  276.11   28.12   0  0.09336
  -3   0 -12  924.96    8.77   0  0.14002
  -3   0  12  723.43   10.84   0  0.14175
  -3   1 -16 1245.01   10.46   0  0.15551
  -3   1  16    3.80    7.16   0  0.16237
  -3   2 -19  126.66    7.78   0  0.16930
  -3   2  19  214.26    7.96   0  0.17689
  -3   3 -21    5.69    7.59   0  0.17751
  -3   3  21   38.98    5.27   0  0.18617
  -3   4 -23   50.62    7.81   0  0.19282
  -3   4  23  108.03    7.59   0  0.19480
  -2   0 -10 5015.26   19.49   0  0.12785
  -2   0  10 2968.89   18.13   0  0.12940
  -2   1 -15  268.74    8.37   0  0.15070
  -2   2 -18  154.70    7.89   0  0.16337
  -2   2  18  982.66    9.47   0  0.17119
  -2   3 -20   22.12    7.57   0  0.17273
  -2   3  20  294.73    7.74   0  0.18165
  -2   4 -22   15.66    7.65   0  0.18478
  -2   4  22  105.51    7.38   0  0.19076
  -2   5  23  132.18    5.58   0  0.19605
  -1   0  -8  384.16    8.82   0  0.11888
  -1   0   7   11.21   10.85   0  0.11125
  -1   1 -13  615.82   10.19   0  0.13782
  -1   1  13  871.37   10.31   0  0.14406
  -1   2 -17    5.67    7.58   0  0.15955
  -1   2  16 2901.92   12.95   0  0.16332
  -1   3  19   -2.36    7.41   0  0.17674
  -1   4  21   39.43    7.54   0  0.18621
  -1   5 -23    4.39    7.85   0  0.18923
  -1   5  22   75.49    7.61   0  0.19183
   0   0  -2  149.33   16.77   0  0.08930
   0   1  10 1180.81   12.12   0  0.13107
   0   2  14 1159.32   10.09   0  0.15282
   0   3 -18  768.30    9.62   0  0.16364
   0   3  17   51.23    7.18   0  0.16806
   0   4  19   45.60    7.20   0  0.17828
   0   5 -22  217.81    8.31   0  0.18638
   0   5  21  118.82    7.55   0  0.18746
   1   1   7  237.91   11.44   0  0.10900
   1   2  12 3664.18   15.73   0  0.13775
   1   3 -17    3.43    7.26   0  0.16239
   1   3  15   -1.84    7.49   0  0.15749
   1   4 -19  146.24    7.85   0  0.17099
   1   4  17   10.70    7.41   0  0.16929
   1   5 -21   80.24    7.85   0  0.18590
   1   5  19    4.87    7.44   0  0.17872
   1   6  20   -0.15    7.71   0  0.18520
   2   2 -11   51.49    8.77   0  0.12560
   2   2   8   71.81    6.84   0  0.11793
   2   2   9 1088.71   12.28   0  0.11985
   2   3 -15   15.91    7.92   0  0.15103
   2   3  12 1142.87    8.99   0  0.14127
   2   4  15   -3.85    7.44   0  0.15849
   2   5  17   22.68    7.55   0  0.16981
   2   6 -21    2.15    7.48   0  0.18819
   2   6  18  454.43    6.67   0  0.17575
   2   7  19   85.87    5.96   0  0.18129
   3   2   3  142.27   13.19   0  0.08692
   3   2   4 3884.30   24.51   0  0.08676
   3   3 -12 2605.53   21.14   0  0.12873
   3   3   9   -5.54    9.08   0  0.12029
   3   4 -15  143.30   10.05   0  0.15105
   3   4  12  978.64    8.57   0  0.14164
   3   5  14  328.25    6.38   0  0.15473
   3   5  15   36.15    7.80   0  0.15832
   3   6 -19    0.21    9.50   0  0.17529
   3   6  16   44.71    7.75   0  0.16594
   3   7  17  107.17    8.24   0  0.17182
   4   3   4 3302.65   21.96   0  0.08650
   4   3   5  412.91   13.32   0  0.08854
   4   4   9  286.15    9.88   0  0.11959
   4   5 -15  350.73   11.58   0  0.15380
   4   5  11  454.09    7.32   0  0.13575
   4   5  12  991.05   10.56   0  0.13929
   4   6 -17   29.26    9.75   0  0.16631
   4   6  13    4.94    5.91   0  0.14964
   4   6  14  638.27    9.42   0  0.15347
   4   7  15   42.38    8.66   0  0.16109
   5   4   3  101.58   13.48   0  0.08158
   5   4   4 3744.03   23.12   0  0.08176
   5   5   8  860.89   12.58   0  0.10974
   5   6 -14   73.01   13.17   0  0.15532
   5   6  10  972.02   11.48   0  0.12884
   5   7  12  517.50   10.10   0  0.14219
   5   8  13   -1.12    9.45   0  0.15005
   6   5  -7  119.89   17.82   0  0.11381
   6   5   0 1159.31   19.75   0  0.07239
   6   5   1   55.82   15.19   0  0.07255
   6   5   2  285.34   15.65   0  0.07401
   6   6   5   47.79   13.72   0  0.08578
   6   6   6 1629.24   17.30   0  0.08991
   6   7   7   50.92    8.65   0  0.10412
   6   7   8  593.39   12.86   0  0.11039
   6   8   9   37.12   11.07   0  0.12216
   6   8  10  122.43   10.88   0  0.12685
   7   7  -7   41.39   15.29   0  0.11492
   7   7   0    1.38   15.69   0  0.07632
   7   7   1  128.80   16.55   0  0.07518
   7   7   2  591.91   17.94   0  0.07474
   7   8   3  104.55   16.02   0  0.08078
   7   8   4  339.83   17.25   0  0.07947
   7   9   4   20.91   16.20   0  0.08638
 -14  -1  10   44.21   16.45   0  0.12996
 -13  -1  -8  724.67   13.02   0  0.13155
 -13  -1  -7    8.93   11.26   0  0.12574
 -12  -1 -10  348.76    8.48   0  0.13961
 -12  -1  -9    9.84    9.96   0  0.13571
 -11  -1 -10  144.61   10.11   0  0.13983
 -11   0 -15   -4.67    9.34   0  0.15980
 -11   0 -14  623.51   10.82   0  0.15457
 -11   0  18  468.50   14.55   0  0.16883
 -10  -2  -1   77.39   11.54   0  0.10194
 -10  -2   0  410.97   13.52   0  0.09756
 -10  -2   1  201.35   13.56   0  0.09354
 -10  -2   2 1760.05   18.68   0  0.09909
 -10  -1 -11   97.02    9.26   0  0.14349
 -10  -1 -10  603.15   10.77   0  0.13713
 -10   0 -15   -1.16    8.74   0  0.15919
 -10   0  18  552.44   14.04   0  0.16902
 -10   1  21   36.37   10.11   0  0.18474
  -9  -2  -2  136.15   11.18   0  0.10507
  -9  -2  -1   66.94   11.31   0  0.10115
  -9  -2   0  503.99   13.81   0  0.09660
  -9  -2   1  135.81   12.63   0  0.09302
  -9  -2   2  197.21   12.22   0  0.09879
  -9  -1 -11   24.02    8.90   0  0.14330
  -9   0 -16  555.65    7.84   0  0.16327
  -9   0 -15   -2.76    8.51   0  0.15867
  -9   2  23  117.56    8.30   0  0.19385
  -8  -2  -1  182.72   11.89   0  0.09959
  -8  -2   0  216.48   12.59   0  0.09403
  -8  -2   1  361.89   13.51   0  0.09366
  -8  -1 -11  268.83    9.00   0  0.14244
  -8   0 -16  108.83    6.22   0  0.16285
  -8   0 -15    4.88    8.19   0  0.15821
  -8   0  17    2.65    9.57   0  0.16698
  -8   1 -19  124.17    8.64   0  0.17474
  -8   1  20 1046.68   11.03   0  0.18108
  -7  -1 -11   37.63    8.55   0  0.14171
  -7  -1  12 1273.07   20.84   0  0.14043
  -7   0 -16  155.71    6.13   0  0.16218
  -7   0 -15    4.11    8.18   0  0.15950
  -7   1 -19   17.76    8.09   0  0.17272
  -7   2  22  103.33    7.80   0  0.18960
  -7   3  24    3.07    7.58   0  0.19751
  -6  -1 -11  310.68    7.06   0  0.14053
  -6  -1 -10  507.75    9.97   0  0.13471
  -6  -1  11  507.56   16.97   0  0.13522
  -6   0 -15   -4.18    8.17   0  0.15664
  -6   1 -19   81.90    5.71   0  0.17255
  -6   1  19  158.88    7.93   0  0.17632
  -6   2 -21   85.31    8.28   0  0.17924
  -5  -1 -10 1043.44    9.36   0  0.13502
  -5  -1  -9  692.35   10.72   0  0.12943
  -5   0 -15   -2.38    7.97   0  0.15520
  -5   1 -18   56.72    7.77   0  0.16461
  -5   1  18 1018.11   10.09   0  0.17243
  -5   2 -21   10.96    7.83   0  0.17950
  -5   4  24  763.39    9.11   0  0.19868
  -4  -1  -8 3015.56   15.95   0  0.12436
  -4   0 -14 1240.69   10.51   0  0.15162
  -4   0  13    3.70    7.74   0  0.14904
  -4   1 -18  674.67    8.94   0  0.16728
  -4   1  17   27.70    7.46   0  0.16782
  -4   2 -21  189.49    6.05   0  0.18134
  -4   2 -20 1276.84   10.61   0  0.17405
  -4   3 -23    3.83    5.37   0  0.19372
  -4   3  22  271.28    7.80   0  0.19046
  -4   4  23   41.16    5.30   0  0.19518
  -3  -1  -6 1425.69   12.82   0  0.11336
  -3  -1  -5  469.67   12.29   0  0.10931
  -3   0 -13  -12.91    8.22   0  0.14516
  -3   1 -17  308.04    8.12   0  0.16248
  -3   2 -20   14.39    7.36   0  0.17640
  -3   2  18   -0.67    4.96   0  0.17361
  -3   3 -22   27.69    7.64   0  0.18716
  -3   4  22  244.30    7.91   0  0.19132
  -2   0 -11    9.80    8.53   0  0.13363
  -2   0   9   34.07    8.69   0  0.13026
  -2   1 -16 1088.30   10.10   0  0.15708
  -2   1  14  589.72    9.33   0  0.15242
  -2   2 -19   -9.80    7.35   0  0.17063
  -2   2  17  512.02    8.52   0  0.16880
  -2   3 -21   13.45    7.26   0  0.18201
  -2   3  19   36.05    7.06   0  0.17823
  -2   4 -23   14.24    7.63   0  0.19277
  -2   4  21  286.79    7.71   0  0.18714
  -2   5  22  153.85    5.66   0  0.19235
  -1   0  -9   11.17    9.36   0  0.12402
  -1   0   6  534.34   13.84   0  0.11407
  -1   1 -14  922.81   10.52   0  0.14542
  -1   1  12   14.01    7.86   0  0.14193
  -1   2 -18  565.32    8.72   0  0.16667
  -1   2  15  409.46    8.39   0  0.16002
  -1   3 -20  346.38    8.19   0  0.17692
  -1   3  18 2223.77   11.36   0  0.17381
  -1   4 -22  369.41    8.40   0  0.18777
  -1   4  20 1091.44    9.44   0  0.18296
  -1   5  21  134.16    7.61   0  0.18806
  -1   6  22  544.12    6.72   0  0.19302
   0   0  -3   10.99   16.83   0  0.09286
   0   1 -12 4283.50   18.57   0  0.13532
   0   1   9  649.42   11.07   0  0.12848
   0   2 -16  658.23    9.51   0  0.15354
   0   2  13  786.89    9.57   0  0.14960
   0   3 -19    3.04    7.06   0  0.17420
   0   3  16  516.60    8.31   0  0.16503
   0   4 -21  100.67    7.48   0  0.18359
   0   4  18  456.37    8.04   0  0.17455
   0   5 -23   88.81    7.68   0  0.19708
   0   5  20  276.65    7.85   0  0.18396
   0   6  21   -2.98    7.65   0  0.18926
   1   1  -9 1569.89   15.91   0  0.11912
   1   1   6  448.47   12.93   0  0.10800
   1   2 -14   64.56    8.35   0  0.14209
   1   2  11  906.68   10.82   0  0.13553
   1   3  14 2481.70   12.31   0  0.15415
   1   4 -20  769.02    9.59   0  0.18208
   1   4  16  924.07    9.31   0  0.16568
   1   5  18  295.42    7.86   0  0.17538
   1   6  19    6.58    7.71   0  0.18029
   2   2   7  106.02    7.28   0  0.11534
   2   3  11   39.40    5.88   0  0.13777
   2   4 -18  259.25    8.18   0  0.17017
   2   4  14  508.23    8.55   0  0.15516
   2   5 -20  418.52    9.03   0  0.18193
   2   5  16  844.52    9.22   0  0.16597
   2   6  17   18.33    7.70   0  0.17129
   2   7  18  373.38    8.68   0  0.17678
   3   2  -6 2996.21   46.80   0  0.10449
   3   2   2 3735.59   26.70   0  0.08649
   3   3   8  656.50   10.87   0  0.11884
   3   4 -16 1711.52   13.62   0  0.16032
   3   4  11  379.52    9.15   0  0.13811
   3   5 -18  408.96   10.69   0  0.17265
   3   5  13  207.33    6.25   0  0.15075
   3   6  15    5.37    7.73   0  0.16162
   3   7  16  572.85    9.22   0  0.16715
   4   3   3  134.48   12.88   0  0.08466
   4   4   7  156.04    7.58   0  0.11143
   4   4   8  666.24   11.38   0  0.11456
   4   5  10  112.65    6.49   0  0.13202
   4   6  12   50.52    8.43   0  0.14495
   4   7  13   77.50    6.38   0  0.15191
   4   7  14  256.34    9.17   0  0.15658
   4   8  14   79.56    9.01   0  0.15791
   5   4   1  518.66   15.25   0  0.07945
   5   4   2  701.04   15.98   0  0.07993
   5   5   6 2284.78   16.57   0  0.10249
   5   5   7  179.62   11.22   0  0.10554
   5   6   9   18.24    9.61   0  0.12196
   5   7 -16   33.94   11.88   0  0.16522
   5   7  10  207.87   10.01   0  0.13295
   5   7  11   15.99    9.12   0  0.13780
   5   8  11   53.84    9.68   0  0.13998
   5   8  12  155.38    9.79   0  0.14501
   6   5  -6 1131.43   25.50   0  0.09476
   6   5  -5  438.04   18.51   0  0.08797
   6   5  -4  379.60   18.86   0  0.08026
   6   5  -3  179.72   19.79   0  0.07071
   6   5  -2  617.92   21.60   0  0.06975
   6   5  -1   65.54   18.66   0  0.07096
   6   6   3   40.12   14.50   0  0.07762
   6   6   4  261.91   15.10   0  0.07873
   6   7   6   22.76   11.88   0  0.10086
   6   8   7  117.06   12.29   0  0.11026
   6   8   8  295.57   12.48   0  0.11496
   7   7  -6  160.77   16.69   0  0.10710
   7   7  -5  123.04   15.03   0  0.10085
   7   7  -4   30.43   15.90   0  0.09256
   7   7  -3   75.30   17.59   0  0.08355
   7   7  -2  532.36   19.55   0  0.08125
   7   7  -1   34.80   18.56   0  0.07892
   7   8  -9   17.83   15.83   0  0.13255
   7   8   0  288.07   16.09   0  0.08420
   7   8   1   12.51   15.39   0  0.08194
   7   8   2   33.66   15.81   0  0.08048
   7   9   2  230.51   16.61   0  0.08732
   7   9   3   16.84   16.12   0  0.08561
 -13  -1  -9   45.34   10.81   0  0.13545
 -12  -2  -2  413.57   13.63   0  0.10523
 -12  -2  -1  150.81   13.40   0  0.10057
 -12  -2   0  924.82   16.69   0  0.09699
 -12  -2   1   82.20   13.51   0  0.09785
 -12  -2   2 1146.85   16.80   0  0.10210
 -12  -1 -11   31.41    9.86   0  0.14571
 -11  -2  -4  337.15   12.04   0  0.11332
 -11  -2  -3  106.37   11.64   0  0.10931
 -11  -2  -2  350.84   12.77   0  0.10605
 -11  -2  -1  160.89   12.46   0  0.10231
 -11  -2   0  430.49   16.32   0  0.09788
 -11  -2   1  129.49   16.00   0  0.09458
 -11  -2   2   28.49   15.23   0  0.09879
 -11  -2   3   93.98   14.72   0  0.10423
 -11  -2   4 1125.10   16.12   0  0.11014
 -11  -1 -12  671.36   10.87   0  0.14978
 -11  -1 -11   22.58    9.52   0  0.14369
 -10  -2  -5  390.35   11.47   0  0.11705
 -10  -2  -4 1630.50   15.04   0  0.11296
 -10  -2  -3  143.94   11.27   0  0.10941
 -10  -2  -2 1142.44   16.80   0  0.10571
 -10  -2   3   74.70   14.07   0  0.10395
 -10  -2   4    3.34   12.96   0  0.11008
 -10  -1 -13   20.66    6.35   0  0.15336
 -10  -1 -12   45.59    9.02   0  0.14759
 -10   0 -17   -5.08    6.01   0  0.17102
 -10   0 -16   78.81    8.81   0  0.16443
  -9  -2  -5   18.29   10.36   0  0.11612
  -9  -2  -4  685.74   12.50   0  0.11246
  -9  -2  -3  378.62   11.72   0  0.10877
  -9  -2   3  101.84   13.83   0  0.10390
  -9  -2   4 1372.41   19.38   0  0.10878
  -9  -1 -13   66.97    6.38   0  0.15298
  -9  -1 -12 1275.67   11.73   0  0.14698
  -9  -1  13  149.47   17.27   0  0.14590
  -9   0 -17   -5.26    8.36   0  0.16820
  -9   0  17   -1.65    9.73   0  0.16757
  -9   1  20  365.38    9.17   0  0.18169
  -8  -2  -5  465.62    8.86   0  0.11515
  -8  -2  -4  910.36   12.89   0  0.11091
  -8  -2  -3  452.71   11.95   0  0.10768
  -8  -2  -2 1948.47   16.84   0  0.10376
  -8  -2   2 1983.56   21.27   0  0.09911
  -8  -2   3  321.85   14.99   0  0.10409
  -8  -1 -13    7.02    5.77   0  0.15238
  -8  -1 -12    7.74    8.33   0  0.14698
  -8   0 -17   -2.79    8.11   0  0.16770
  -8   1 -20  173.63    8.61   0  0.18129
  -8   2  22  437.53    8.99   0  0.19020
  -7  -2  -3  391.67   12.07   0  0.10471
  -7  -2  -2   69.99   11.27   0  0.09965
  -7  -2  -1  193.38   12.10   0  0.09451
  -7  -2   0 2176.85   19.57   0  0.09339
  -7  -2   1  131.18   12.03   0  0.09740
  -7  -1 -13  112.11    6.13   0  0.15142
  -7  -1 -12 2139.59   12.58   0  0.14576
  -7   0 -17   13.77    7.97   0  0.16622
  -7   0  16   99.23    9.69   0  0.16376
  -7   1 -20  542.45    9.27   0  0.18026
  -7   1  19   43.21    7.75   0  0.17728
  -7   3  23    3.08    7.52   0  0.19535
  -6  -1 -12  354.41    9.11   0  0.14619
  -6   0 -17   -3.58    5.55   0  0.16776
  -6   0 -16  736.25    9.51   0  0.16145
  -6   0  15    6.67    7.85   0  0.15953
  -6   1 -20   97.53    7.90   0  0.17925
  -6   1  18  784.00    9.65   0  0.17331
  -6   2  21  115.88    7.61   0  0.18588
  -5  -1 -11   17.03    8.47   0  0.14026
  -5  -1   9  446.96   15.90   0  0.13024
  -5   0 -16    2.85    7.65   0  0.16330
  -5   0  14   96.53    8.05   0  0.15400
  -5   1 -20  830.61    7.67   0  0.17846
  -5   1 -19   -4.39    7.55   0  0.17156
  -5   1  17 1517.53   11.32   0  0.16966
  -5   2 -22  308.09    8.40   0  0.18902
  -5   2  20 1842.28   11.28   0  0.18195
  -5   3  22 1497.53   10.53   0  0.19082
  -5   4  23   28.13    5.48   0  0.19540
  -4  -1 -10  173.71    6.96   0  0.13385
  -4  -1  -9  175.61    9.29   0  0.12888
  -4  -1   7  199.37   16.95   0  0.11900
  -4   0 -15   -2.12    7.76   0  0.15678
  -4   1 -19  263.47    7.96   0  0.17402
  -4   1  16 2673.90   13.57   0  0.16547
  -4   2 -22  213.49    5.95   0  0.18861
  -4   2  19   12.78    7.35   0  0.17761
  -4   4  22  298.93    6.02   0  0.19175
  -3  -1  -8  520.50    8.80   0  0.12203
  -3  -1  -7  103.41   10.11   0  0.11713
  -3   0 -14 3045.08   13.80   0  0.15125
  -3   0  11    4.09    7.98   0  0.14010
  -3   1 -18    2.32    7.52   0  0.16746
  -3   1  15    2.40    7.31   0  0.15993
  -3   2 -21   38.56    7.36   0  0.18397
  -3   3 -23    2.20    7.44   0  0.19224
  -3   4  21   10.82    5.12   0  0.18771
  -2   0 -13   30.73    5.75   0  0.14532
  -2   0 -12  206.92    8.65   0  0.14013
  -2   1 -17   43.49    7.60   0  0.16323
  -2   1  13   61.23    7.71   0  0.15134
  -2   2 -20 1404.62   10.49   0  0.17904
  -2   2  16   17.83    7.43   0  0.16561
  -2   3 -22  894.57    9.71   0  0.18863
  -2   3  18  528.59    6.61   0  0.17457
  -2   4  20  546.18    8.41   0  0.18343
  -1   0 -10 1091.65   12.27   0  0.12893
  -1   1 -16  884.35    8.25   0  0.15770
  -1   1 -15   12.42    8.07   0  0.15158
  -1   1  11   28.90    8.05   0  0.13974
  -1   2 -19  210.24    7.89   0  0.17401
  -1   2  14   93.56    5.45   0  0.15671
  -1   3 -21    7.49    7.21   0  0.18776
  -1   3  17   -0.66    7.14   0  0.17048
  -1   4 -23   39.19    7.53   0  0.19488
  -1   4  19  198.51    7.60   0  0.17905
  -1   5  20  633.88    8.45   0  0.18413
  -1   6  21   -0.43    5.29   0  0.18892
   0   0  -5    3.43   14.30   0  0.09882
   0   0  -4 9445.15   47.81   0  0.09621
   0   1 -13   30.94    8.25   0  0.14118
   0   1   8 3921.09   18.49   0  0.12600
   0   2 -17  272.79    8.31   0  0.16097
   0   2  12  153.93    5.90   0  0.14639
   0   3 -20   40.77    7.19   0  0.18067
   0   3  15    9.87    7.23   0  0.16120
   0   4 -22   44.44    7.35   0  0.19121
   0   4  17  197.56    7.58   0  0.17063
   0   5  19  104.65    7.47   0  0.17985
   0   6  20  102.26    7.72   0  0.18524
   1   1 -10 1612.30   15.17   0  0.12432
   1   1   5  834.29   15.43   0  0.10631
   1   2 -15  392.85    9.30   0  0.14861
   1   2  10  504.25    9.87   0  0.13250
   1   3 -18 1893.06   13.29   0  0.16973
   1   3  13   21.55    7.71   0  0.15134
   1   4 -21   25.23    7.22   0  0.18935
   1   4  15  103.38    7.63   0  0.16188
   1   5 -22   53.10    9.09   0  0.19337
   1   5  17  151.37    7.84   0  0.17125
   1   6  18  875.26    9.37   0  0.17605
   1   7  19   45.65    8.16   0  0.18102
   2   2 -12   53.85   10.24   0  0.13177
   2   2   6 3944.18   18.87   0  0.11318
   2   3 -16  297.76   10.11   0  0.15836
   2   3  10  781.81   10.28   0  0.13469
   2   4 -19  127.25    7.69   0  0.17870
   2   4  13  477.99    8.78   0  0.15090
   2   5 -21   85.46    7.56   0  0.19195
   2   5  15  194.39    7.87   0  0.16174
   2   6 -22  288.78    8.93   0  0.19526
   2   6  16  129.82    7.95   0  0.16695
   2   7  17   86.93    8.16   0  0.17209
   3   2   1  666.51   17.29   0  0.08527
   3   3 -13   49.49   10.55   0  0.13860
   3   3   7   88.70    9.85   0  0.11429
   3   4  10   41.16    8.39   0  0.13359
   3   5 -19   10.28    7.20   0  0.18161
   3   5  12  470.84    8.94   0  0.14677
   3   6 -20   61.33    9.51   0  0.18714
   3   6  14  904.41    9.63   0  0.15726
   3   7  15   45.92    8.10   0  0.16282
   3   8  15   95.62    6.47   0  0.16339
   4   3   1   32.09   12.84   0  0.08399
   4   3   2  198.69   13.53   0  0.08423
   4   4 -13  379.71   13.72   0  0.14192
   4   4   6 1215.21   13.47   0  0.10857
   4   5 -16  928.40   13.53   0  0.16461
   4   5   9    9.89    8.90   0  0.12776
   4   6 -18  840.60   13.87   0  0.17790
   4   6  11    9.98    8.56   0  0.14049
   4   7 -19    2.22   10.99   0  0.18550
   4   7  12  492.74    9.65   0  0.14712
   4   8  13   59.06    9.09   0  0.15254
   5   4   0 1402.58   19.05   0  0.07835
   5   5 -12  421.68   18.43   0  0.13683
   5   5   5   40.93   11.41   0  0.09717
   5   6   7    6.71   10.29   0  0.11163
   5   6   8  905.21   12.03   0  0.11820
   5   7   9  106.10   10.03   0  0.12809
   5   8  10   87.11   10.19   0  0.13481
   6   6   1  130.55   15.26   0  0.07480
   6   6   2 1104.85   18.10   0  0.07589
   6   7   4 1109.33   16.61   0  0.08787
   6   7   5  209.29   13.71   0  0.09166
   6   8   5  100.84    9.31   0  0.10023
   6   8   6  386.92   13.36   0  0.10387
   6   9   6  190.96   12.90   0  0.11296
   6   9   7    7.60   12.17   0  0.11705
   7   8  -8   11.14   14.55   0  0.12687
   7   8  -7   75.07   13.55   0  0.11930
   7   8  -4  147.93   14.30   0  0.09323
   7   8  -3   29.49   13.74   0  0.09060
   7   8  -2  150.59   14.67   0  0.08804
   7   8  -1  125.72   18.27   0  0.08605
   7   9  -1    3.74   14.52   0  0.09246
   7   9   0  104.44   15.52   0  0.09032
   7   9   1   14.26   19.00   0  0.08878
 -13  -2  -3   62.69   12.67   0  0.10748
 -13  -2  -2  355.36   14.44   0  0.10321
 -13  -2  -1  105.15   14.10   0  0.09939
 -13  -2   0  425.84   15.32   0  0.09775
 -13  -2   1   24.33   13.87   0  0.09770
 -13  -2   2  184.54   13.78   0  0.10306
 -12  -2  -6   18.26   11.14   0  0.12120
 -12  -2  -5  280.51   12.19   0  0.11687
 -12  -2  -4 1323.56   15.56   0  0.11337
 -12  -2  -3   80.96   12.13   0  0.10935
 -12  -2   3   24.80   14.89   0  0.10650
 -12  -2   4  342.29   15.87   0  0.11101
 -12  -1 -12  160.55   10.13   0  0.14946
 -12   0  17    0.93   12.64   0  0.16803
 -11  -2  -7   83.42   10.67   0  0.12545
 -11  -2  -6  479.40   11.96   0  0.12132
 -11  -2  -5    8.11   10.85   0  0.11734
 -11  -2   5  119.48   13.90   0  0.11533
 -11  -1 -14  516.54    8.20   0  0.15929
 -11  -1 -13  112.68    9.52   0  0.15335
 -11   0  17    3.48   10.32   0  0.16882
 -11   1  20  393.81   11.66   0  0.18239
 -10  -2  -8 1702.16   11.85   0  0.12949
 -10  -2  -7   99.64   10.42   0  0.12501
 -10  -2  -6  398.09   11.33   0  0.12119
 -10  -2   5  576.96   16.19   0  0.11506
 -10  -1 -14  316.98    9.73   0  0.15910
 -10   0  17    0.25    9.98   0  0.16887
 -10   1  20  351.39   11.09   0  0.18206
  -9  -2  -8  296.03    7.81   0  0.12886
  -9  -2  -7  232.52   10.31   0  0.12441
  -9  -2  -6  277.61   10.53   0  0.12048
  -9  -1 -14  251.47    9.04   0  0.15765
  -9   0 -18  599.60    9.71   0  0.17395
  -9   2  22  230.71   10.32   0  0.19049
  -8  -2  -7  377.25   10.68   0  0.12308
  -8  -2  -6  543.05   11.30   0  0.11949
  -8  -2   4  130.65   13.55   0  0.11050
  -8  -1 -14  626.77    9.59   0  0.15704
  -8  -1  12   37.77   13.44   0  0.14620
  -8   0 -18   27.73    8.36   0  0.17211
  -8   0  16 3008.72   17.49   0  0.16493
  -8   1  19  283.82    8.62   0  0.17824
  -8   2  21   94.65    8.06   0  0.18666
  -8   3  23    4.55    7.61   0  0.19449
  -7  -2  -7  492.77    8.67   0  0.12172
  -7  -2  -6   91.94   10.30   0  0.11698
  -7  -2  -5  183.13   10.52   0  0.11383
  -7  -2  -4 1732.74   15.19   0  0.10938
  -7  -2   2 1030.39   18.13   0  0.10196
  -7  -1 -14   11.33    7.90   0  0.15691
  -7   0 -18 1062.45   10.36   0  0.17274
  -7   1 -21   47.33    7.97   0  0.18383
  -7   2  21   36.52    7.60   0  0.18653
  -6  -2  -4  441.09   12.09   0  0.10489
  -6  -2  -3  478.85   12.93   0  0.09901
  -6  -2  -2 1450.27   16.80   0  0.09303
  -6  -2  -1   92.01   11.72   0  0.09380
  -6  -1 -14  875.21    8.10   0  0.15574
  -6  -1 -13   -1.75    8.11   0  0.15092
  -6   0 -18  207.47    8.14   0  0.17366
  -6   1 -21   35.39    7.73   0  0.18558
  -6   2  20   38.79    7.35   0  0.18275
  -6   4  23   21.18    5.40   0  0.19511
  -5  -1 -13  251.20    6.49   0  0.14993
  -5  -1 -12 2625.64   13.41   0  0.14478
  -5   0 -17    2.77    7.71   0  0.16621
  -5   1 -21   81.01    5.65   0  0.18468
  -5   2 -23   65.02    7.83   0  0.19441
  -5   2  19  373.47    8.17   0  0.17840
  -4  -1 -11  565.33    9.82   0  0.13865
  -4   0 -17    4.32    5.26   0  0.16729
  -4   0 -16  870.19    9.37   0  0.16158
  -4   0  12 3418.11   18.01   0  0.14677
  -4   1 -20    5.99    7.49   0  0.17940
  -4   2 -23   13.17    5.26   0  0.19543
  -4   2  18 1368.90   10.39   0  0.17421
  -3  -1  -9  554.61   10.80   0  0.12581
  -3   0 -15    2.27    7.56   0  0.15745
  -3   1 -19   -3.95    7.49   0  0.17394
  -3   1  14 1693.43   11.96   0  0.15722
  -3   2 -22  450.27    8.48   0  0.19088
  -3   2  17    0.63    7.59   0  0.16953
  -3   3 -24  148.31    7.89   0  0.20171
  -2   0 -14 2941.56   13.70   0  0.15082
  -2   0   8 3750.43   22.12   0  0.12913
  -2   1 -18  978.40    9.63   0  0.16915
  -2   1  12 2815.82   13.76   0  0.14795
  -2   2 -21  244.95    7.88   0  0.18577
  -2   2  15   27.43    5.36   0  0.16204
  -2   3 -23    3.82    7.35   0  0.19472
  -2   4  19  172.73    5.54   0  0.17934
  -2   6  22  530.40    8.83   0  0.19318
  -1   0 -12  233.61    6.94   0  0.13863
  -1   0 -11    2.22    8.42   0  0.13365
  -1   0   5   15.06   11.32   0  0.11447
  -1   1 -17  214.46    6.11   0  0.16344
  -1   1  10 1576.33   11.54   0  0.13707
  -1   2 -20  374.33    8.15   0  0.18091
  -1   3 -22  254.14    8.01   0  0.19140
  -1   3  16   40.11    7.19   0  0.16623
  -1   4 -24    8.00    7.34   0  0.20091
  -1   4  18  186.29    7.44   0  0.17524
  -1   5  19   -9.64    7.14   0  0.18077
  -1   6  20   44.78    5.44   0  0.18458
   0   0  -7   13.34   11.29   0  0.10716
   0   0  -6 2653.57   22.66   0  0.10437
   0   1 -14   31.55    8.07   0  0.14676
   0   2 -18  457.79    8.64   0  0.16810
   0   3 -21    1.32    7.03   0  0.18757
   0   3  14  620.83    8.74   0  0.15743
   0   4 -23    2.80    7.01   0  0.20028
   0   4  16  713.97    8.76   0  0.16640
   0   5  18  168.39    7.70   0  0.17585
   0   6  19   52.16    7.66   0  0.18139
   1   1 -11   41.19    8.96   0  0.12893
   1   1   4  497.82   14.77   0  0.10708
   1   2 -16 2733.27   14.47   0  0.15588
   1   2   9   45.91    8.56   0  0.13006
   1   3 -19   14.17    7.25   0  0.17630
   1   3  12  238.51    8.26   0  0.14732
   1   4  14    8.79    7.50   0  0.15731
   1   5 -23    4.38    7.37   0  0.20071
   1   5  16  703.94    8.89   0  0.16717
   1   6  17    7.35    7.72   0  0.17095
   1   7  18   76.73    8.08   0  0.17698
   2   2 -13 1020.24   12.24   0  0.13708
   2   3 -17  112.01    7.77   0  0.16552
   2   3   9    5.27    5.85   0  0.13044
   2   4 -20  397.74    8.61   0  0.18648
   2   4  12  504.02    8.89   0  0.14707
   2   5  14  299.92    8.27   0  0.15767
   2   6  15   42.13    7.84   0  0.16199
   2   7  16  505.09    9.03   0  0.16736
   2   8  16  496.34    7.27   0  0.16841
   3   2  -7 1498.16   29.21   0  0.10284
   3   2   0 2438.75   28.55   0  0.08531
   3   3 -14 3765.94   19.90   0  0.14568
   3   3   6 3343.92   18.07   0  0.11123
   3   4 -17   11.33    9.07   0  0.16873
   3   4   9  278.94    9.10   0  0.12990
   3   5  11  106.37    8.33   0  0.14207
   3   6 -21    3.11    7.49   0  0.19337
   3   6  13   75.34    8.00   0  0.15295
   3   7  14  129.90    8.35   0  0.15862
   3   8  14   95.65    6.62   0  0.15786
   4   3  -8  231.22   22.41   0  0.10356
   4   3   0 2083.18   22.11   0  0.08307
   4   4 -14  308.58   11.54   0  0.14943
   4   4   5  872.90   12.93   0  0.10479
   4   5   8 1290.66   12.26   0  0.12304
   4   6  10 1288.60   11.53   0  0.13574
   4   7  11   54.76    8.88   0  0.14196
   4   8  12  285.78    9.62   0  0.14836
   5   4  -2 3350.22   28.31   0  0.07703
   5   4  -1  260.87   17.92   0  0.07794
   5   5   3  336.00   12.93   0  0.09010
   5   5   4  200.17   12.05   0  0.09357
   5   6 -15   37.04   12.75   0  0.16164
   5   6   6  696.72   12.13   0  0.10914
   5   7   7   10.92    7.12   0  0.11724
   5   7   8  283.78   10.81   0  0.12245
   5   8   8  412.06    8.77   0  0.12375
   5   8   9   11.63    9.99   0  0.12952
   5   9   9    4.84   10.89   0  0.12997
   6   6   0  934.27   18.77   0  0.07340
   6   7   2  234.79   16.03   0  0.07675
   6   7   3   52.37   15.08   0  0.07926
   6   8   4   73.50   12.83   0  0.09737
   6   9   4  295.81   13.68   0  0.10415
   6   9   5    7.73   12.74   0  0.10778
   7   8  -6  330.40   17.88   0  0.11006
   7   8  -5   54.85   16.12   0  0.09827
   7   9  -8    0.55   14.77   0  0.13207
   7   9  -7    2.28   13.91   0  0.12207
   7   9  -6   13.13   15.11   0  0.11227
   7   9  -5   -0.48   16.38   0  0.10143
   7   9  -4  184.17   17.71   0  0.09882
   7   9  -3   13.78   17.31   0  0.09679
   7   9  -2   94.26   17.76   0  0.09459
 -14  -2  -4  762.30   15.59   0  0.11046
 -14  -2  -3   43.28   14.26   0  0.10497
 -14  -2  -2   -0.07   14.19   0  0.10205
 -14  -2  -1   79.44   15.00   0  0.09905
 -14  -2   0 1136.67   18.88   0  0.09568
 -14  -2   1  128.94   14.75   0  0.09996
 -14  -2   2  437.83   15.47   0  0.10407
 -13  -2  -7   36.53   11.65   0  0.12489
 -13  -2  -6  372.92   13.03   0  0.12008
 -13  -2  -5   76.66   12.06   0  0.11604
 -13  -2  -4   26.22   15.09   0  0.11180
 -13  -2   3  138.41   16.04   0  0.10837
 -13  -2   4 1043.47   19.10   0  0.11271
 -12  -2  -8 1086.48   14.16   0  0.13018
 -12  -2  -7   51.32   11.15   0  0.12524
 -12  -2   5  378.39   15.45   0  0.11691
 -11  -2  -9   35.12   10.00   0  0.13402
 -11  -2  -8   18.87   10.26   0  0.12947
 -10  -2 -10    5.29    9.23   0  0.13835
 -10  -2  -9  219.34   10.38   0  0.13367
 -10  -1 -16  154.45    6.81   0  0.16911
 -10  -1 -15  193.55    9.43   0  0.16279
  -9  -2 -10  738.26   10.90   0  0.13825
  -9  -2  -9   27.10    9.16   0  0.13303
  -9  -2   5  273.30   16.21   0  0.11533
  -9  -1 -16  790.67   10.19   0  0.16871
  -9  -1 -15   11.02    8.31   0  0.16240
  -9   0  16  204.58    9.04   0  0.16512
  -9   1  19   19.42    7.73   0  0.17862
  -9   2  21    8.97    7.82   0  0.18751
  -8  -2 -10  100.14    6.62   0  0.13718
  -8  -2  -9  228.09    9.88   0  0.13194
  -8  -2  -8 1812.28   13.56   0  0.12755
  -8  -1 -16   45.47    8.13   0  0.16754
  -8  -1 -15  310.83    8.90   0  0.16172
  -8   0 -20   17.21    8.04   0  0.18497
  -8   0 -19    6.82    8.06   0  0.18081
  -7  -2  -9   78.89    9.24   0  0.13069
  -7  -2  -8 1670.39   13.42   0  0.12625
  -7  -2   3  592.25   16.13   0  0.10832
  -7  -1 -16 1604.24    9.75   0  0.16705
  -7  -1 -15    6.48    8.08   0  0.16066
  -7  -1  11    7.37   12.05   0  0.14326
  -7   0 -20  676.93    7.72   0  0.18428
  -7   0 -19   -6.13    8.04   0  0.17931
  -7   0  15   12.81    9.42   0  0.16144
  -7   1  18  155.85    7.98   0  0.17423
  -7   2  20 1126.11   10.34   0  0.18263
  -6  -2  -8 1326.97   10.66   0  0.12406
  -6  -2  -7  282.52   10.63   0  0.11866
  -6  -2  -6 1063.09   12.80   0  0.11495
  -6  -2  -5  286.50   11.01   0  0.10990
  -6  -2   0   25.53   13.65   0  0.09584
  -6  -2   1  837.07   15.27   0  0.10021
  -6  -1 -15  241.98    8.42   0  0.16149
  -6   0 -19   13.14    7.76   0  0.17752
  -6   0  14 3273.31   17.63   0  0.15751
  -6   1 -22  230.81    8.24   0  0.18915
  -6   1  17   21.63    7.50   0  0.17004
  -6   2  19   13.05    7.33   0  0.17941
  -5  -1 -14  169.45    8.26   0  0.15529
  -5   0 -19   -0.76    5.26   0  0.17850
  -5   0 -18 1770.29   11.15   0  0.17247
  -5   0  13   31.56    9.51   0  0.15295
  -5   1 -22  421.87    8.74   0  0.19111
  -5   1  16   48.15    7.38   0  0.16602
  -4  -1 -13    6.51    8.13   0  0.14812
  -4  -1 -12 1870.07   12.28   0  0.14344
  -4   0 -18  331.41    8.03   0  0.17338
  -4   1 -21   -0.87    7.53   0  0.18485
  -4   1  15  217.04    8.11   0  0.16206
  -4   2 -24  392.21    8.54   0  0.20239
  -4   2  17  183.98    5.84   0  0.17136
  -3  -1 -11  120.93    8.96   0  0.13599
  -3  -1 -10 1600.56   12.82   0  0.13119
  -3   0 -17   -5.00    7.27   0  0.16607
  -3   0 -16  137.11    7.75   0  0.16171
  -3   0  10 1466.59   15.15   0  0.13852
  -3   1 -20 1480.83   10.49   0  0.17909
  -3   2 -23   56.99    7.48   0  0.19799
  -3   2  16 3167.08   13.66   0  0.16663
  -2  -1  -7  906.04   13.58   0  0.11025
  -2  -1  -6 1050.00   14.86   0  0.10486
  -2  -1  -5 1307.75   16.96   0  0.10112
  -2  -1  -4 1058.91   17.88   0  0.09448
  -2  -1  -3 2138.82   23.69   0  0.08976
  -2  -1  -2 6765.56   38.86   0  0.09084
  -2  -1  -1  733.21   19.08   0  0.09419
  -2   0 -15   -1.19    7.57   0  0.15547
  -2   1 -19  373.42    8.07   0  0.17416
  -2   2 -22   48.16    7.21   0  0.19180
  -2   3 -24  225.36    7.91   0  0.20226
  -2   4  18  364.13    6.18   0  0.17634
  -1   0 -13   -4.15    8.03   0  0.14333
  -1   1 -18  292.46    8.12   0  0.16961
  -1   2 -21   38.10    7.27   0  0.18797
  -1   2  13  105.42    8.09   0  0.15187
  -1   3 -23   36.10    7.36   0  0.19772
  -1   3  15   -8.39    7.23   0  0.16202
  -1   5  18  698.09    6.84   0  0.17659
  -1   6  19   -5.39    5.23   0  0.18103
   0   0  -9    5.34    9.65   0  0.11691
   0   0  -8 5308.07   24.86   0  0.11322
   0   1 -16 2322.99   12.90   0  0.15795
   0   1 -15  687.98    9.67   0  0.15240
   0   1   7  386.79   11.03   0  0.12431
   0   2 -19    2.62    7.26   0  0.17474
   0   2  11   17.49    7.84   0  0.14243
   0   3 -22  907.55    9.65   0  0.19574
   0   3  13   21.30    5.39   0  0.15410
   0   4 -24  348.34    8.50   0  0.20723
   0   4  15   47.59    7.48   0  0.16294
   0   5  17   40.51    7.56   0  0.17134
   0   6  18 1127.93    9.81   0  0.17647
   0   7  18  266.40    6.29   0  0.17780
   0   7  19  105.45    8.29   0  0.18129
   1   1 -13  987.39   11.46   0  0.13909
   1   1 -12   24.75    8.66   0  0.13403
   1   2 -17   13.69    7.49   0  0.16214
   1   2   8 2806.51   15.79   0  0.12754
   1   3 -20  103.80    7.31   0  0.18367
   1   3  11   52.02    8.04   0  0.14279
   1   4 -22  460.57    8.65   0  0.19606
   1   4  13   34.37    7.70   0  0.15384
   1   5  15    0.23    7.63   0  0.16156
   1   6  16  268.92    8.20   0  0.16718
   1   7  17  112.62    8.30   0  0.17248
   1   8  17   42.88    6.04   0  0.17341
   2   2 -14 1104.00   12.13   0  0.14253
   2   2   5  216.87   11.11   0  0.10994
   2   3 -18  455.25    8.67   0  0.17277
   2   3   8 2539.06   13.25   0  0.12768
   2   4  11   29.64    7.91   0  0.14254
   2   5 -22   97.58    9.13   0  0.19835
   2   5  13    8.03    7.73   0  0.15290
   2   6  14 1533.97   10.82   0  0.15715
   2   7  15  123.01    8.24   0  0.16231
   2   8  15   31.18    5.97   0  0.16381
   3   2  -8  905.57   21.74   0  0.10580
   3   2  -1 1230.63   24.77   0  0.08538
   3   3 -15    3.91    7.91   0  0.15209
   3   3   5  334.60   11.39   0  0.10762
   3   4 -18    7.85    7.28   0  0.17504
   3   4   8 2801.43   14.91   0  0.12488
   3   5 -20  266.59    9.74   0  0.18903
   3   5  10  824.78   10.00   0  0.13798
   3   6  11   15.97    5.78   0  0.14373
   3   6  12  403.70    8.79   0  0.14774
   3   7  12  435.25    7.30   0  0.14893
   3   7  13   71.09    8.45   0  0.15306
   3   8  13   18.66    8.87   0  0.15272
   4   3  -1   39.44   15.69   0  0.08245
   4   4   4  153.97   11.20   0  0.10026
   4   5 -17   11.76    9.09   0  0.17271
   4   5   7  612.80   11.25   0  0.11745
   4   6 -19    3.62    9.17   0  0.18490
   4   6   8  179.09    7.02   0  0.12673
   4   6   9   31.63    9.01   0  0.13054
   4   7  10   42.77    8.91   0  0.13648
   4   8  10  378.08    7.80   0  0.13771
   4   8  11   41.97    9.27   0  0.14211
   5   4  -4  317.45   19.36   0  0.07627
   5   4  -3  649.29   20.73   0  0.07698
   5   5   2 1464.97   17.35   0  0.08577
   5   6   4 1200.70   12.35   0  0.09886
   5   6   5    0.37   11.15   0  0.10198
   5   7 -17  104.18   13.20   0  0.17773
   5   7   6  820.17   12.78   0  0.11256
   5   8   7  134.72   11.06   0  0.11845
   5   9   7   25.85   11.64   0  0.11936
   5   9   8    2.75   11.31   0  0.12263
   6   6  -3   23.41   14.04   0  0.07834
   6   6  -2  904.60   18.83   0  0.07592
   6   6  -1   45.85   18.92   0  0.07445
   6   7   1  204.42   15.60   0  0.07725
   6   8   2  561.38   15.45   0  0.08952
   6   8   3  167.45   13.95   0  0.09159
   6   9   3    2.65   13.53   0  0.09876
 -14  -2   3   36.32   16.36   0  0.10957
 -14  -2   4  630.61   17.95   0  0.11416
 -14  -1  11  223.35   22.16   0  0.13800
 -13  -2  -8   87.97   11.57   0  0.13026
 -13  -2   5    7.65   14.54   0  0.11680
 -12  -2 -11    4.29    7.13   0  0.14665
 -12  -2 -10  190.94   10.65   0  0.14032
 -12  -2  -9  104.54   10.76   0  0.13530
 -12  -2   6 1640.78   21.94   0  0.12137
 -11  -2 -12  274.53    7.75   0  0.15127
 -11  -2 -11   87.06    9.83   0  0.14565
 -11  -2 -10  456.92   10.94   0  0.13980
 -11  -2   6  208.57   15.94   0  0.12110
 -11   1  19   19.16   10.02   0  0.18069
 -10  -2 -12 1215.97   11.83   0  0.15075
 -10  -2 -11    5.07    9.16   0  0.14539
 -10  -2   6 2514.43   26.19   0  0.12095
 -10   1  19  176.84   10.53   0  0.17975
 -10   2  21  185.65    8.65   0  0.18846
  -9  -2 -12   12.57    8.66   0  0.14960
  -9  -2 -11  141.93    9.30   0  0.14334
  -9  -1 -18  514.79    7.46   0  0.18000
  -9  -1 -17   69.83    8.40   0  0.17266
  -9   3  22  921.59   10.25   0  0.19651
  -8  -2 -12 1828.41   10.75   0  0.14887
  -8  -2 -11   55.29    9.00   0  0.14227
  -8  -2   5  764.89   18.52   0  0.11785
  -8  -1 -18  335.75    6.72   0  0.17930
  -8  -1 -17   22.53    8.06   0  0.17217
  -8   1  18 1435.48   12.06   0  0.17619
  -8   2  20  284.36    8.09   0  0.18746
  -7  -2 -11  144.03    8.80   0  0.14221
  -7  -2 -10  829.54   10.80   0  0.13620
  -7  -2   4 1573.60   20.84   0  0.11585
  -7  -1 -17  220.65    8.51   0  0.17401
  -7   0 -21    2.09    7.76   0  0.19181
  -7   1  17  924.17   10.26   0  0.17644
  -6  -2 -10  210.84    9.07   0  0.13519
  -6  -2  -9  329.57    9.68   0  0.12950
  -6  -2   2 1317.33   19.10   0  0.10730
  -6  -1 -17    0.96    5.51   0  0.17291
  -6  -1 -16   12.42    7.86   0  0.16576
  -6   0 -21    2.59    5.28   0  0.19055
  -6   0 -20  100.03    7.79   0  0.18357
  -5  -2  -8 2609.46   13.76   0  0.12191
  -5  -2  -7 1395.93   13.41   0  0.11600
  -5  -2  -6   98.77   10.18   0  0.11097
  -5  -2  -5  115.71   10.63   0  0.10522
  -5  -2  -4 3247.84   20.24   0  0.09896
  -5  -2  -3  413.43   13.01   0  0.09386
  -5  -2  -2  874.31   15.12   0  0.09452
  -5  -2  -1  242.49   12.08   0  0.10131
  -5  -1 -16 1755.31    9.67   0  0.16692
  -5  -1 -15   11.65    7.82   0  0.16006
  -5   0 -20  521.81    8.55   0  0.18558
  -5   1 -23   -2.85    7.56   0  0.19628
  -4  -1 -15  163.94    6.02   0  0.16040
  -4  -1 -14 1424.29   10.90   0  0.15417
  -4   0 -19   -8.49    7.22   0  0.17893
  -4   0  11    8.39    7.54   0  0.14831
  -4   1 -22  670.65    9.01   0  0.19036
  -4   1  14 1509.08   11.40   0  0.16413
  -3  -1 -13  539.50    7.44   0  0.14777
  -3  -1 -12 1758.23   12.27   0  0.14181
  -3   0 -18 1852.20   10.70   0  0.17425
  -3   1 -22  146.42    5.54   0  0.19248
  -3   1 -21  147.70    7.63   0  0.18539
  -3   1  13 1051.93   10.64   0  0.15487
  -3   2 -24    4.76    7.33   0  0.20136
  -3   2  15  951.72    8.13   0  0.16810
  -3   3  17    0.64    5.07   0  0.17663
  -2  -1 -10  164.97    7.03   0  0.12747
  -2  -1  -9  765.44   11.89   0  0.12123
  -2  -1  -8 5448.98   22.06   0  0.11636
  -2   0 -17   21.09    5.22   0  0.16750
  -2   0 -16  268.51    7.87   0  0.16136
  -2   0   7   34.27    9.16   0  0.13224
  -2   1 -20  378.50    8.14   0  0.18016
  -2   1  11  321.33    8.65   0  0.15040
  -2   2 -23   -3.23    7.04   0  0.19686
  -2   7  20  545.40    6.78   0  0.19034
  -1   0 -14 1784.53   11.99   0  0.14946
  -1   1 -19    0.09    7.31   0  0.17514
  -1   1   9 1585.18   13.13   0  0.13850
  -1   2 -22  552.01    8.45   0  0.19557
  -1   2  12 3951.73   15.42   0  0.15474
  -1   3 -24  405.61    8.07   0  0.20559
  -1   3  14 3720.68   12.80   0  0.16378
  -1   5  17   55.68    5.15   0  0.17710
  -1   6  18  402.15    6.29   0  0.18159
  -1   7  19    4.39    7.71   0  0.18562
   0   0 -11   19.86    6.36   0  0.12839
   0   0 -10 6277.44   23.41   0  0.12315
   0   1 -17   15.87    7.39   0  0.16425
   0   2 -20  859.37    9.33   0  0.18230
   0   2  10 3159.01   15.06   0  0.14243
   0   3 -23    6.15    6.88   0  0.20330
   0   3  12  997.10    8.28   0  0.15487
   0   4  14 1228.94    8.33   0  0.16339
   0   5  16 1523.13   10.38   0  0.16818
   0   6  17   21.21    7.74   0  0.17344
   0   7  17   45.39    5.63   0  0.17791
   1   1 -14 1573.85   12.67   0  0.14490
   1   1   3 1266.34   18.99   0  0.10536
   1   2 -18  115.27    7.60   0  0.16983
   1   2   7  574.30    8.81   0  0.12829
   1   3 -21    1.25    6.82   0  0.19203
   1   3  10 3168.32   14.47   0  0.14472
   1   4 -23   36.69    7.06   0  0.20292
   1   4  12 1787.47    9.75   0  0.15432
   1   5  14  636.98    8.93   0  0.16000
   1   6  15   -1.05    7.64   0  0.16565
   1   7  16  464.15    8.89   0  0.16942
   1   8  16  453.25    9.09   0  0.17298
   2   2 -15   28.44    8.11   0  0.14824
   2   2   4 1886.57   17.25   0  0.10837
   2   3 -19   35.25    7.17   0  0.18080
   2   3   7    8.00    5.99   0  0.12813
   2   4 -21  207.11    9.23   0  0.19322
   2   4  10 1158.37   10.65   0  0.14124
   2   5 -23   95.81    7.48   0  0.20553
   2   5  12 1703.80   11.26   0  0.14965
   2   6  13   57.31    7.63   0  0.15679
   2   7  14  140.11    8.31   0  0.15931
   2   8  14  296.21    8.99   0  0.16309
   3   2  -9  550.28   16.50   0  0.10819
   3   2  -2 6042.71   47.86   0  0.08701
   3   3 -16  599.65   10.11   0  0.15944
   3   3   4 4005.22   20.92   0  0.10588
   3   4 -19  102.47    7.45   0  0.18363
   3   4   7  421.45    9.97   0  0.12415
   3   5 -21   39.92    7.36   0  0.19645
   3   5   9  299.78    8.63   0  0.13725
   3   6  10  416.44    6.90   0  0.14338
   3   7  11   22.12    6.06   0  0.14831
   3   8  12  490.39    9.90   0  0.15125
   4   3  -9   68.98   16.45   0  0.10735
   4   3  -2   85.96   15.96   0  0.08296
   4   4 -15   24.55    9.67   0  0.15583
   4   4   3  181.18   11.81   0  0.09824
   4   5 -18   29.47    8.88   0  0.17951
   4   5   6  189.37   10.27   0  0.11463
   4   6   7   11.11    9.05   0  0.12610
   4   7   8 1084.51    9.57   0  0.13150
   4   7   9  118.33    9.35   0  0.13282
   4   8   9   11.81    9.68   0  0.13507
   4   9   9   15.87    7.19   0  0.13574
   4   9  10  262.55   10.73   0  0.13784
   5   4  -6 3204.88   42.33   0  0.07909
   5   4  -5   17.73   19.90   0  0.07548
   5   5 -13  121.27   15.16   0  0.14625
   5   5   1  132.74   13.50   0  0.08248
   5   6 -16  171.56   12.30   0  0.16967
   5   6   3   15.18   11.28   0  0.09849
   5   7   5   92.88   11.14   0  0.10776
   5   8   5   10.92    8.00   0  0.11167
   5   8   6   -5.26   11.09   0  0.11522
   5   9   6  587.16   12.85   0  0.11870
   6   6  -5   21.57   16.51   0  0.08264
   6   6  -4  772.29   20.03   0  0.08025
   6   7  -1    6.90   14.22   0  0.08031
   6   7   0  524.30   19.56   0  0.07870
   6   8   0   32.86   14.41   0  0.08521
   6   8   1   24.22   14.58   0  0.08471
   6   9   1   19.96   13.82   0  0.09602
   6   9   2   82.39   17.33   0  0.09570
 -14  -2   5  125.91   15.17   0  0.12357
 -13  -2   6    3.62   15.53   0  0.12339
 -13   0  16  670.72   17.33   0  0.17028
 -11  -2 -14  120.32    6.94   0  0.16314
 -11  -2 -13   -0.31    9.27   0  0.15728
 -11   0  16  344.28   11.85   0  0.17272
 -10  -2 -14  302.98    9.60   0  0.16251
 -10  -2 -13  242.10    9.54   0  0.15567
 -10   0  16 1963.73   18.14   0  0.16910
  -9  -2 -14  522.81    9.85   0  0.16176
  -9  -2 -13   22.80    8.74   0  0.15517
  -9  -2   6 1349.55   22.70   0  0.12246
  -9   1  18   29.69    9.31   0  0.18085
  -9   2  20  642.65    9.29   0  0.19033
  -8  -2 -14  105.73    8.34   0  0.16067
  -8  -2 -13  385.88    9.22   0  0.15410
  -8  -1 -19  132.34    8.23   0  0.18619
  -8   0  15   -0.35    9.46   0  0.16670
  -7  -2 -13    5.77    8.07   0  0.15248
  -7  -2 -12  250.06    8.77   0  0.14756
  -7  -1 -19   23.77    5.57   0  0.18526
  -7  -1 -18  323.46    8.61   0  0.17819
  -7   0  14   75.56    7.90   0  0.16620
  -6  -2 -12 1773.32   11.88   0  0.14673
  -6  -2 -11  205.55    8.95   0  0.14068
  -6  -1 -18  551.06    8.81   0  0.17943
  -6   0 -22  108.91    7.74   0  0.19728
  -6   0  13   14.17    7.69   0  0.16061
  -6   1  16 1941.84   12.57   0  0.17234
  -6   2  18  774.96    8.94   0  0.18420
  -5  -2 -11  476.53    7.52   0  0.13915
  -5  -2 -10  392.69    9.73   0  0.13319
  -5  -2  -9  182.51    9.47   0  0.12772
  -5  -2   0 3146.84   22.83   0  0.10536
  -5  -1 -17  259.22    8.03   0  0.17213
  -5  -1   8 2340.30   27.76   0  0.13678
  -5   0 -21   -7.22    7.28   0  0.19098
  -5   0  12   99.32    7.93   0  0.15629
  -5   1  15   29.89    7.12   0  0.17124
  -5   5  21   61.24    5.26   0  0.19793
  -4  -1 -16  782.56    9.21   0  0.16671
  -4   0 -21    5.46    4.99   0  0.19080
  -4   0 -20  564.53    8.44   0  0.18417
  -4   1 -24   87.96    5.44   0  0.20547
  -4   1 -23   94.44    7.53   0  0.19758
  -4   2  16   24.50    6.94   0  0.17393
  -4   5  20 1014.12    7.42   0  0.19413
  -3  -1 -15   13.95    5.53   0  0.15947
  -3  -1 -14  437.64    8.85   0  0.15355
  -3   0 -19    5.61    7.05   0  0.18090
  -3   0   9   17.47    8.16   0  0.14112
  -3   1 -23   13.10    4.97   0  0.20044
  -3   1  12  388.54    8.53   0  0.16052
  -2  -1 -12 4943.75   16.59   0  0.13922
  -2  -1 -11 1362.60   12.14   0  0.13338
  -2  -1   0 1487.31   24.17   0  0.10308
  -2   0 -18 1248.17    9.86   0  0.17418
  -2   1 -22  777.68    7.41   0  0.19450
  -2   1 -21    5.76    7.02   0  0.18718
  -2   2 -24  775.04    8.70   0  0.20606
  -2   7  19   54.85    5.48   0  0.19091
  -1   0 -16  296.38    8.22   0  0.16144
  -1   0 -15   -3.68    7.65   0  0.15571
  -1   0   4  757.22   16.71   0  0.12408
  -1   1 -20 1285.32    9.86   0  0.18262
  -1   2 -23   85.80    7.27   0  0.20285
  -1   3 -25    1.91    7.09   0  0.21414
  -1   4  15  111.71    7.35   0  0.17224
  -1   6  17    2.09    5.09   0  0.18205
  -1   7  18  355.94    8.30   0  0.18598
   0   0 -12 3146.35   16.07   0  0.13471
   0   1 -18  440.26    8.34   0  0.17037
   0   1   6 3579.25   20.95   0  0.12554
   0   2 -21  170.49    7.41   0  0.18973
   0   2   9 1173.37    9.70   0  0.14561
   0   3 -24  111.32    7.28   0  0.21078
   0   5  15  403.38    8.02   0  0.16858
   0   6  16    7.42    7.44   0  0.17394
   0   7  16 1158.09    8.11   0  0.17780
   0   8  17  100.44    8.33   0  0.18062
   1   1 -15    9.55    7.78   0  0.15064
   1   2 -19  166.27    7.58   0  0.17754
   1   3 -22  964.80    9.26   0  0.19884
   1   3   9   65.51    5.67   0  0.14604
   1   4 -24  251.65    7.70   0  0.21092
   1   4  11  110.24    5.67   0  0.15483
   1   5  13   21.05    7.38   0  0.16064
   1   6  14  575.41    8.67   0  0.16679
   1   7  15   14.61    7.81   0  0.16975
   1   8  15  220.38    8.45   0  0.17247
   2   1  -8 2273.09   22.68   0  0.10191
   2   1  -7  311.78   17.32   0  0.09565
   2   1  -6 3499.07   37.26   0  0.08916
   2   2 -16   19.91    7.80   0  0.15546
   2   2   3  118.65   10.67   0  0.11336
   2   3 -20  258.99    7.65   0  0.18834
   2   4 -22   92.92    7.22   0  0.20088
   2   4   9  558.70    9.18   0  0.14344
   2   5  11  671.21    9.21   0  0.14913
   2   6  12   70.18    7.77   0  0.15505
   2   7  13  112.09    8.04   0  0.15838
   2   8  13   72.52    8.47   0  0.16219
   2   9  13   12.92    6.22   0  0.16261
   3   2 -11 1503.90   17.34   0  0.11844
   3   2 -10 3483.14   27.24   0  0.11322
   3   3   3   54.34    9.61   0  0.10954
   3   4   6  434.39    9.83   0  0.12563
   3   5   8  192.08    8.44   0  0.13663
   3   6   9   45.55    5.88   0  0.14278
   3   7  10  550.88    9.50   0  0.14706
   3   8  11  111.41    9.11   0  0.14838
   3   9  11   34.36    9.49   0  0.14967
   4   3  -3   16.84   15.24   0  0.08489
   4   4 -16   81.58    9.66   0  0.16294
   4   4   2  998.37   14.55   0  0.09743
   4   5   4 1146.52   10.98   0  0.11333
   4   5   5   22.71    9.68   0  0.11364
   4   6 -20    1.64    8.92   0  0.19722
   4   6   6 1776.29   13.34   0  0.12504
   4   7   7   45.06    9.03   0  0.13031
   4   8   8   53.95    9.57   0  0.13352
   4   9   8  300.91   10.86   0  0.13338
   5   4  -7  255.82   26.35   0  0.09065
   5   5  -1  609.63   15.61   0  0.08271
   5   5   0  200.55   16.66   0  0.08190
   5   6   2   35.25   11.45   0  0.09645
   5   7   3   13.28   10.86   0  0.10431
   5   7   4   21.51   10.87   0  0.10594
   5   8   4  718.00   13.12   0  0.10989
   5   9   4  107.75   11.77   0  0.11508
   5   9   5   43.94   11.82   0  0.11564
   6   6  -9   38.88   17.32   0  0.11902
   6   6  -8 1433.06   24.75   0  0.10295
   6   6  -7   40.75   18.30   0  0.08962
   6   6  -6   68.95   18.93   0  0.08629
   6   7  -3  105.42   14.28   0  0.08438
   6   7  -2  755.35   19.87   0  0.08232
   6   8  -1  152.56   15.08   0  0.08441
   6   9  -1   28.03   14.15   0  0.09456
   6   9   0  280.88   15.34   0  0.09270
 -14  -2   6  681.33   17.17   0  0.13281
 -12  -2   7   11.61   14.40   0  0.13340
 -12   0  16 1137.14   18.77   0  0.17389
 -11  -3  -6  111.75    8.30   0  0.11671
 -11  -3  -5    2.25   11.52   0  0.11130
 -11  -3  -4  161.00   12.15   0  0.10575
 -11  -3  -3   64.68   11.56   0  0.10928
 -11  -2   7  358.35   17.45   0  0.13270
 -11   1  18   52.93    7.75   0  0.18997
 -11   2  20  168.56    8.23   0  0.19789
 -10  -3  -7   10.54    7.37   0  0.12190
 -10  -3  -6 2098.36   16.40   0  0.11567
 -10  -3  -5   24.10   11.00   0  0.10890
 -10  -3  -4  555.46   12.99   0  0.10627
 -10  -3  -3   57.15   11.28   0  0.10947
 -10  -2 -16  424.36    9.77   0  0.17452
 -10  -2 -15   -0.28    8.60   0  0.16885
 -10  -2   7   14.46   14.86   0  0.13414
 -10   1  18 1031.13   12.57   0  0.18672
 -10   2  20  365.93   10.21   0  0.19457
  -9  -3  -6  516.97    9.41   0  0.11410
  -9  -3  -5   15.68    7.68   0  0.10626
  -9  -2 -16  170.89    8.77   0  0.17362
  -9  -2 -15   80.38    8.62   0  0.16695
  -9  -1  12  617.30   19.00   0  0.15097
  -9   0  15   31.67    9.21   0  0.17471
  -9   3  21    3.03    7.43   0  0.20045
  -8  -2 -16 1087.61   10.40   0  0.17256
  -8  -2 -15    7.85    7.82   0  0.16751
  -8   1  17   13.74    9.03   0  0.18272
  -8   2  19    0.02    7.25   0  0.19071
  -7  -2 -16   30.60    5.56   0  0.17128
  -7  -2 -15   80.68    7.95   0  0.16598
  -7  -2 -14 1125.64   10.32   0  0.15957
  -7  -1 -20  535.25    9.16   0  0.19086
  -7   1  16  649.93    9.20   0  0.18313
  -6  -2 -15    1.64    5.61   0  0.16435
  -6  -2 -14   10.17    7.90   0  0.15866
  -6  -2 -13  159.21    8.28   0  0.15252
  -6  -2   3  378.12   14.01   0  0.12088
  -6  -1 -20  114.28    5.69   0  0.19088
  -6  -1 -19   87.40    7.69   0  0.18429
  -6   5  21    5.57    5.03   0  0.20326
  -5  -2 -13   33.08    5.82   0  0.15108
  -5  -2 -12  907.23   10.32   0  0.14509
  -5  -2   1  422.05   12.31   0  0.11592
  -5  -1 -19    6.60    7.34   0  0.18357
  -5  -1 -18   73.92    7.54   0  0.17850
  -5   0 -23    1.51    5.28   0  0.20341
  -5   0 -22  740.90    9.03   0  0.19660
  -5   6  21    4.46    5.19   0  0.20302
  -4  -2 -11   84.31    6.45   0  0.13639
  -4  -2 -10 1314.64   12.14   0  0.13008
  -4  -2  -9  575.10   10.78   0  0.12387
  -4  -2  -8  920.42   11.94   0  0.11873
  -4  -2  -7  238.32   10.58   0  0.11209
  -4  -2  -6 1836.47   15.62   0  0.10499
  -4  -2  -5  278.41   11.64   0  0.10029
  -4  -2  -4  395.64   12.00   0  0.10081
  -4  -2  -3  333.91   11.95   0  0.10197
  -4  -2  -2 2541.03   19.09   0  0.11040
  -4  -1 -18  799.21    9.00   0  0.17835
  -4  -1 -17   64.70    7.73   0  0.17189
  -4   0 -22    4.33    7.18   0  0.19491
  -4   1  13   15.32    7.02   0  0.16860
  -4   6  20    4.94    5.08   0  0.19933
  -3  -1 -16 1536.15   10.50   0  0.16562
  -3   0 -21    7.49    7.16   0  0.19173
  -3   0 -20  224.07    7.70   0  0.18553
  -3   1 -24  533.12    8.49   0  0.20789
  -3   2  14 1132.48    9.87   0  0.17334
  -3   4  17   12.49    4.83   0  0.18691
  -3   5  18  634.96    6.53   0  0.19140
  -2  -1 -14  344.47    6.69   0  0.15134
  -2  -1 -13   48.55    8.49   0  0.14524
  -2   0 -19    6.35    7.26   0  0.17918
  -2   1 -23  148.01    7.45   0  0.20219
  -2   1  10 3136.26   15.46   0  0.15376
  -2   2 -25  111.78    7.35   0  0.21349
  -1  -1  -8  -12.93    7.76   0  0.10765
  -1  -1  -7  191.82    9.46   0  0.10095
  -1  -1  -6  410.27   10.77   0  0.10163
  -1   0 -17   -0.69    7.39   0  0.16660
  -1   1 -21  257.38    7.80   0  0.18871
  -1   1   8  997.70   11.62   0  0.14249
  -1   2 -24   10.07    6.97   0  0.20791
  -1   7  17  153.74    7.82   0  0.18677
  -1   8  17   19.38    5.57   0  0.18748
   0   0 -14 3367.17   15.33   0  0.14620
   0   0 -13   -3.67    8.28   0  0.14015
   0   1 -19  266.39    7.82   0  0.17628
   0   2 -23    0.82    4.92   0  0.20481
   0   2 -22   13.89    6.93   0  0.19745
   0   3 -25    3.20    6.82   0  0.21850
   0   3  11   11.33    7.19   0  0.15751
   0   4  13 1026.96    9.29   0  0.16413
   0   5  14   47.36    7.12   0  0.17157
   0   6  15   59.79    7.43   0  0.17565
   0   8  16  276.67    8.48   0  0.18063
   1   1 -17  212.39    6.21   0  0.16250
   1   1 -16  479.12    8.99   0  0.15675
   1   1   2  919.68   17.63   0  0.11348
   1   2 -20 1088.69    9.71   0  0.18525
   1   2   6 1572.57   13.32   0  0.13432
   1   3 -23   10.12    6.72   0  0.20635
   1   5  12  108.84    7.45   0  0.16276
   1   6  13   48.16    7.48   0  0.16739
   1   7  14  406.40    8.41   0  0.16880
   1   8  14   22.49    7.94   0  0.17234
   2   1 -11  307.86   10.95   0  0.11880
   2   1 -10 2972.32   20.93   0  0.11402
   2   1  -9  208.15   13.85   0  0.10743
   2   1  -5  229.79   21.35   0  0.09139
   2   2 -18  896.35    9.86   0  0.17030
   2   2 -17  501.33    9.04   0  0.16297
   2   3 -21    2.02    6.79   0  0.19595
   2   3   6   33.47    8.51   0  0.13003
   2   4 -23   33.50    7.00   0  0.20846
   2   4   8   93.68    7.72   0  0.14448
   2   5  10   23.65    7.48   0  0.15039
   2   6  11   58.61    7.64   0  0.15523
   2   7  12 1076.25    9.98   0  0.15800
   2   8  12  172.09    8.59   0  0.16150
   2   9  12  180.14    9.08   0  0.16175
   3   2 -12 2419.71   19.30   0  0.12362
   3   3 -18 2195.38   13.94   0  0.17408
   3   3 -17   -6.23    9.28   0  0.16681
   3   3   2 3725.72   21.19   0  0.11107
   3   4 -20 1002.78   11.90   0  0.19148
   3   4   5  188.51    8.88   0  0.12719
   3   5 -22  169.61    9.41   0  0.20572
   3   5   7  143.43    8.39   0  0.13726
   3   6   8  623.21    9.44   0  0.14247
   3   7   9  203.09    8.86   0  0.14653
   3   8  10   17.38    8.51   0  0.14763
   3   9  10  484.71   10.44   0  0.14681
   4   3 -11    9.61   13.81   0  0.11315
   4   3 -10  187.80   17.43   0  0.10968
   4   3  -4  638.23   20.45   0  0.08730
   4   4 -17  304.75    8.92   0  0.17000
   4   4   1  495.84   12.52   0  0.09867
   4   5 -19  182.69    9.71   0  0.18793
   4   5   3  777.23    9.84   0  0.11363
   4   6 -21   17.68    8.89   0  0.20271
   4   6   5  105.78    9.23   0  0.12448
   4   7   6   54.93    9.26   0  0.12939
   4   8   7   77.87    9.74   0  0.13045
   4   9   7    8.86   10.36   0  0.12939
   5   5 -14  327.37   15.29   0  0.15211
   5   5  -2  927.54   16.96   0  0.08345
   5   6   1   21.56   11.83   0  0.09115
   5   7 -18   76.23   12.36   0  0.18583
   5   7   2  742.95   13.26   0  0.10303
   5   8   3  220.54   12.07   0  0.10850
   5   9   3   30.36   11.56   0  0.11496
   6   7  -5    4.66   12.54   0  0.09028
   6   7  -4  301.13   17.53   0  0.08713
   6   8  -3    7.11   13.60   0  0.08983
   6   8  -2  337.39   18.40   0  0.08737
   6   9  -3    2.96   13.43   0  0.09737
   6   9  -2    9.34   16.78   0  0.09520
 -13  -3  -7    5.81   11.84   0  0.12312
 -13  -3  -6   17.01   12.52   0  0.11664
 -13  -3  -5    7.77   12.73   0  0.11173
 -13  -3  -4  196.45   13.66   0  0.10736
 -13  -3  -3   10.80   12.47   0  0.11239
 -13  -3  -2   49.06   12.17   0  0.11670
 -13  -2   7  187.61   15.65   0  0.13782
 -12  -3 -10  723.25   10.12   0  0.14080
 -12  -3  -9    6.31   10.55   0  0.13505
 -12  -3  -8   73.09   11.16   0  0.12913
 -12  -3  -7   12.87   11.12   0  0.12345
 -12  -3  -6 1616.57   16.78   0  0.11741
 -12  -3  -5   15.35   12.06   0  0.11115
 -12  -3  -4   84.76   12.86   0  0.10494
 -12  -3  -3    2.55   12.38   0  0.10828
 -12  -3  -2 1831.09   17.87   0  0.11178
 -12  -3  -1   20.70   11.64   0  0.11676
 -12   1  18  746.69   12.57   0  0.19152
 -11  -3 -10   13.74    9.81   0  0.14018
 -11  -3  -9    0.07   10.28   0  0.13426
 -11  -3  -8  295.67   11.46   0  0.12861
 -11  -3  -7    8.10   10.72   0  0.12307
 -11  -3  -2  536.10   13.16   0  0.11217
 -11  -3  -1    7.86   11.08   0  0.11524
 -11  -3   0   19.13   10.25   0  0.12343
 -10  -3 -11    6.54    6.66   0  0.14480
 -10  -3 -10 2314.04   15.06   0  0.13935
 -10  -3  -9   -1.00    9.86   0  0.13379
 -10  -3  -8    2.06   10.04   0  0.12743
 -10  -3  -2 1983.69   16.72   0  0.11236
 -10  -3  -1   15.27   10.72   0  0.11571
 -10  -3   0  992.59   13.54   0  0.12405
 -10   0  15    0.21    9.32   0  0.17664
  -9  -3 -11   18.06    6.27   0  0.14392
  -9  -3 -10   61.82    9.31   0  0.13802
  -9  -3  -9    4.35    9.43   0  0.13245
  -9  -3  -8  358.71   10.87   0  0.12651
  -9  -3  -7   34.43   10.20   0  0.12042
  -9  -3  -4   18.28   10.69   0  0.10727
  -9  -3  -3   74.56   10.62   0  0.10929
  -9  -3  -2 1212.05   14.13   0  0.11257
  -9  -3  -1   19.60    9.73   0  0.11948
  -9  -2 -18  158.41    8.44   0  0.18499
  -9  -2 -17    8.71    8.18   0  0.17894
  -9   1  17  206.48    7.88   0  0.18864
  -8  -3 -10 2706.68   12.87   0  0.13656
  -8  -3  -9   14.37    9.33   0  0.13043
  -8  -3  -8  187.91   10.16   0  0.12392
  -8  -3  -7    9.70    9.86   0  0.11794
  -8  -3  -6 1996.99   15.33   0  0.11174
  -8  -3  -5    1.86   10.82   0  0.10554
  -8  -3  -4  802.04   12.90   0  0.10920
  -8  -3  -3    5.51    9.81   0  0.11381
  -8  -2 -18  518.80    7.13   0  0.18396
  -8  -2 -17  201.79    8.44   0  0.17733
  -8  -2   6 2441.95   27.97   0  0.13632
  -8  -1  11 1022.67   18.94   0  0.15871
  -8   0  14 1321.93   13.48   0  0.17601
  -7  -2 -17    5.39    7.60   0  0.17792
  -7  -2   5  393.36   15.45   0  0.13466
  -7  -1 -21   55.81    7.86   0  0.19581
  -7   5  21   21.28    5.08   0  0.20800
  -6  -2 -17  282.79    6.24   0  0.17612
  -6  -2 -16 1625.14   11.14   0  0.17029
  -6  -1 -21   39.28    7.53   0  0.19536
  -6  -1   9   92.88   11.89   0  0.15249
  -6   1  15  245.50    7.75   0  0.17863
  -6   2  17  147.51    7.04   0  0.18736
  -5  -2 -15  268.80    8.35   0  0.16288
  -5  -2 -14  744.65    9.47   0  0.15685
  -5  -1 -21   89.15    5.45   0  0.19573
  -5  -1 -20  973.18    9.34   0  0.18956
  -5   1  14  285.47    7.86   0  0.17403
  -5   2  16 1663.06   10.75   0  0.18343
  -5   6  20  176.27    5.42   0  0.20449
  -4  -2 -13  169.12    6.29   0  0.14815
  -4  -2 -12 1389.88   11.38   0  0.14243
  -4  -2  -1  217.57   10.65   0  0.11934
  -4  -1 -20   12.47    5.04   0  0.18937
  -4  -1 -19  285.44    7.85   0  0.18356
  -4   0 -23    3.34    7.11   0  0.20467
  -4   0  10  969.97   12.70   0  0.15765
  -3  -1 -18    6.59    7.11   0  0.17726
  -3  -1 -17  368.98    7.99   0  0.17106
  -3   0 -22 1332.45   10.02   0  0.19752
  -3   0   8  604.24   10.86   0  0.15423
  -3   1  11   66.93    7.13   0  0.16696
  -3   6  18   95.69    5.08   0  0.19623
  -2  -1 -16 1285.79    8.71   0  0.16332
  -2  -1 -15  320.33    8.46   0  0.15740
  -2   0 -21   13.40    4.94   0  0.19125
  -2   0 -20  731.94    8.81   0  0.18527
  -2   0   6  754.90   13.10   0  0.14392
  -2   1 -24    6.46    6.93   0  0.20865
  -2   2  12   60.46    6.91   0  0.16621
  -2   4  15   14.50    4.67   0  0.18292
  -2   5  16 1819.62    8.71   0  0.18745
  -1  -1 -12  491.22    7.99   0  0.13379
  -1  -1 -11  268.11    9.83   0  0.12656
  -1  -1 -10 2009.38   14.78   0  0.12123
  -1  -1  -9 1256.30   14.04   0  0.11482
  -1  -1  -5  782.40   16.07   0  0.10193
  -1  -1  -4  466.11   12.06   0  0.10689
  -1   0 -19    0.78    4.99   0  0.17895
  -1   0 -18 1824.21   11.02   0  0.17296
  -1   1 -23   76.15    5.10   0  0.20314
  -1   1 -22   17.39    6.90   0  0.19538
  -1   2 -25   33.71    7.03   0  0.21501
  -1   7  16   95.21    7.47   0  0.18718
  -1   8  16  810.45    7.42   0  0.18762
   0   0 -16   11.25    7.71   0  0.15801
   0   0 -15   -2.62    8.03   0  0.15200
   0   1 -21    8.16    4.95   0  0.18941
   0   1 -20  933.79    9.45   0  0.18223
   0   1   5  293.78   11.26   0  0.13177
   0   2 -24  662.32    7.31   0  0.21210
   0   2   8  304.21    8.53   0  0.15051
   0   3  10  118.79    5.39   0  0.16054
   0   4  12   21.56    6.98   0  0.16535
   0   5  13   30.79    6.80   0  0.17198
   0   6  14 1866.89   10.39   0  0.17719
   0   7  15  106.73    7.72   0  0.17798
   0   8  15   14.31    7.71   0  0.18055
   1   1 -18 1134.67   10.36   0  0.16806
   1   2 -22  419.80    6.41   0  0.19972
   1   2 -21   44.40    6.98   0  0.19216
   1   3 -24  359.33    7.73   0  0.21341
   1   3   8 1085.82   10.31   0  0.14795
   1   4  10  165.43    7.66   0  0.15482
   1   5  11   53.17    7.08   0  0.16299
   1   6  12  416.57    8.03   0  0.16732
   1   7  13  161.02    7.85   0  0.16835
   1   8  13   15.77    7.64   0  0.17183
   1   9  13   29.39    8.53   0  0.17202
   2   1 -13   89.55    8.88   0  0.13094
   2   1 -12 2692.07   17.63   0  0.12568
   2   2 -19   46.80    7.26   0  0.17767
   2   2   2 3920.75   23.50   0  0.11898
   2   3 -22  529.47    8.48   0  0.20270
   2   3   5  109.97    8.48   0  0.13437
   2   4 -24  378.52    8.22   0  0.21597
   2   4   7   31.54    5.29   0  0.14425
   2   5   9  114.70    7.63   0  0.15021
   2   6  10 1752.09   10.90   0  0.15534
   2   7  11  152.13    7.97   0  0.15708
   2   8  11   35.17    8.22   0  0.16004
   2   9  11   13.29    8.53   0  0.16076
   3   2 -14 1106.39   13.39   0  0.13368
   3   2 -13    9.97   11.10   0  0.12772
   3   2  -3 1070.13   28.35   0  0.09194
   3   4 -21    6.13    8.44   0  0.19814
   3   4   4 1916.94   13.88   0  0.12711
   3   5 -23    8.01    8.63   0  0.21281
   3   5   6 1396.57   11.66   0  0.13702
   3   6   7    8.13    8.19   0  0.13965
   3   7   8   48.52    8.20   0  0.14558
   3   8   8  777.39    8.39   0  0.14453
   3   8   9   -0.29    8.67   0  0.14575
   3   9   8   52.44    6.75   0  0.14358
   3   9   9   20.43    9.38   0  0.14472
   4   3 -12  166.64   12.85   0  0.11887
   4   4   0  218.07   11.22   0  0.10115
   4   5 -20  660.32   11.84   0  0.19477
   4   6   4  784.70   11.07   0  0.12347
   4   7   5   82.46    9.41   0  0.12774
   4   8   5   24.60    6.97   0  0.12686
   4   8   6  925.97   11.96   0  0.12837
   4   9   5   18.10    7.44   0  0.12759
   4   9   6   72.71   10.77   0  0.12748
   5   5  -3   38.30   13.06   0  0.08314
   5   6 -17   19.19   12.05   0  0.17706
   5   6   0  668.22   14.54   0  0.08960
   5   7   1  201.61   12.43   0  0.09880
   5   8   1   19.90   11.07   0  0.10591
   5   8   2  242.33   12.07   0  0.10657
   5   9   1   80.85   11.66   0  0.11057
   5   9   2  354.57   12.78   0  0.11112
   6   7  -7   67.04   15.44   0  0.09685
   6   7  -6  873.75   19.11   0  0.09364
   6   8  -5   63.93   13.10   0  0.09556
   6   8  -4  181.70   16.69   0  0.09280
   6   9  -5   26.05   13.41   0  0.10069
   6   9  -4  168.32   17.09   0  0.09800
 -14  -3  -2 1280.81   17.15   0  0.11624
 -14  -3  -1   10.87   12.03   0  0.12329
 -14  -2   7    1.56   14.21   0  0.14588
 -13  -3  -1    1.35   13.70   0  0.12447
 -13  -3   0   87.03   11.68   0  0.12379
 -12  -3   0  678.06   15.70   0  0.12401
 -12  -3   1    2.35   10.50   0  0.12740
 -11  -3 -13   -2.20    9.23   0  0.15811
 -11  -3 -12  109.54    9.66   0  0.15186
 -11  -3 -11   12.62    9.50   0  0.14608
 -11  -3   1   10.97   12.25   0  0.12801
 -11   0  15    4.02    8.94   0  0.18815
 -11   2  19  135.72    7.70   0  0.20468
 -10  -3 -14  895.04    9.33   0  0.16307
 -10  -3 -13    3.07    9.02   0  0.15639
 -10  -3 -12  187.52    9.68   0  0.15110
 -10  -3   1   72.71    9.91   0  0.12847
 -10  -1  12  114.05   15.75   0  0.16458
 -10   1  17   10.48    7.13   0  0.19483
  -9  -3 -14    9.77    6.13   0  0.16181
  -9  -3 -13    7.96    8.55   0  0.15605
  -9  -3 -12  672.07   10.42   0  0.15001
  -9  -3   0   38.60    9.67   0  0.12436
  -8  -3 -13   -0.27    8.59   0  0.15471
  -8  -3 -12   28.96    8.73   0  0.14847
  -8  -3 -11    6.71    8.95   0  0.14225
  -8  -3  -2 1018.12   14.83   0  0.11788
  -8  -3  -1   14.02    9.55   0  0.12296
  -8  -2 -19    8.58    7.76   0  0.18996
  -8   1  16  851.71    9.60   0  0.19014
  -8   5  21   14.92    5.13   0  0.21352
  -7  -3 -12  601.64    7.79   0  0.14679
  -7  -3 -11   -5.06    8.76   0  0.14023
  -7  -3 -10  886.27   11.09   0  0.13437
  -7  -3  -9    8.02    9.21   0  0.12835
  -7  -3  -8   55.82    9.57   0  0.12218
  -7  -3  -7   33.16   10.16   0  0.11466
  -7  -3  -6 1268.15   13.88   0  0.10939
  -7  -3  -5   14.48    9.80   0  0.11082
  -7  -3  -4  162.35   10.32   0  0.11179
  -7  -3  -3   83.68    9.41   0  0.11981
  -7  -2 -19  132.77    8.02   0  0.18931
  -7  -2 -18  739.36    9.31   0  0.18297
  -7  -1  10  244.97   13.89   0  0.15998
  -7   0  13   -0.79    8.51   0  0.17572
  -7   2  17    3.98    6.57   0  0.19751
  -6  -3  -8  445.00    8.54   0  0.11776
  -6  -3  -7   30.87    7.42   0  0.11287
  -6  -2 -19   47.42    5.51   0  0.18778
  -6  -2 -18  220.49    8.16   0  0.18226
  -6  -1 -22  221.89    7.93   0  0.20159
  -6   0  12 4741.14   21.14   0  0.17318
  -5  -2 -17   30.37    7.55   0  0.17532
  -5  -2 -16   50.05    7.56   0  0.16893
  -5  -2   2 4367.18   27.87   0  0.13139
  -5  -1 -22  483.33    8.28   0  0.20224
  -5   0  11   36.64    8.68   0  0.17166
  -4  -2 -16 1265.21    8.54   0  0.16706
  -4  -2 -15  131.72    7.89   0  0.16051
  -4  -2 -14  514.12    8.96   0  0.15484
  -4  -1 -21    7.61    7.03   0  0.19497
  -4   0 -24  160.92    7.65   0  0.20859
  -4   1  12 2015.23   12.27   0  0.17673
  -3  -2 -12 2268.90   13.24   0  0.13805
  -3  -2 -11  901.66   11.07   0  0.13123
  -3  -2 -10   45.69    9.29   0  0.12622
  -3  -2  -9   29.97    9.33   0  0.11936
  -3  -2  -8 2254.32   15.78   0  0.11164
  -3  -2  -7  733.13   12.78   0  0.10654
  -3  -2  -6 1034.96   13.97   0  0.10735
  -3  -2  -5   45.41   10.50   0  0.10804
  -3  -2  -4 3231.90   19.64   0  0.11481
  -3  -1 -20 1613.88    8.77   0  0.18896
  -3  -1 -19   -7.37    7.10   0  0.18322
  -3   0 -24  464.12    6.58   0  0.20940
  -3   0 -23   -8.30    7.08   0  0.20415
  -3   2  13   33.93    6.75   0  0.17700
  -2  -1 -18 1058.93    7.76   0  0.17537
  -2  -1 -17   40.56    7.39   0  0.16928
  -2   0 -22  340.79    7.69   0  0.19771
  -2   1 -25    4.18    6.83   0  0.21671
  -2   1   9  242.30    7.81   0  0.16030
  -2   6  16  134.26    5.10   0  0.19318
  -2   8  17   75.07    7.59   0  0.19569
  -1  -1 -14 1046.59   10.57   0  0.14608
  -1  -1 -13  702.81   10.20   0  0.14082
  -1  -1  -3 1146.70   17.48   0  0.11511
  -1   0 -20   18.55    6.86   0  0.18498
  -1   1 -24  756.84    8.82   0  0.21065
  -1   1   7   11.21    7.68   0  0.15022
  -1   7  15   18.15    4.98   0  0.18846
   0   0 -18 2317.59   10.81   0  0.17053
   0   0 -17    0.47    7.55   0  0.16458
   0   1 -22  648.67    8.55   0  0.19702
   0   2 -25   94.16    7.14   0  0.21941
   0   4  11   11.01    6.73   0  0.16942
   0   5  12 1320.36    8.13   0  0.17404
   0   6  13    7.03    6.95   0  0.17841
   0   7  14   12.21    7.15   0  0.17942
   0   8  14  576.59    8.57   0  0.18080
   1   0 -12  453.27   10.64   0  0.12492
   1   0 -11    1.27    9.15   0  0.11989
   1   0 -10   74.22    9.79   0  0.11307
   1   0  -9    1.99   10.24   0  0.10485
   1   0  -8 1455.68   17.49   0  0.10124
   1   0  -7   15.97   11.85   0  0.10169
   1   0  -6  492.59   14.59   0  0.10570
   1   1 -19    2.74    7.29   0  0.17361
   1   2 -23  182.90    7.07   0  0.20709
   1   2   5   74.33    8.70   0  0.13746
   1   3 -25    0.77    6.62   0  0.22105
   1   3   7  245.96    6.15   0  0.15175
   1   4   9   98.31    7.27   0  0.15924
   1   5  10  857.09    7.40   0  0.16401
   1   6  11    5.32    6.97   0  0.16814
   1   7  12   82.01    7.51   0  0.16883
   1   8  12  696.58    8.84   0  0.17232
   1   9  12   71.61    8.35   0  0.17207
   2   1 -15  445.63    9.82   0  0.14278
   2   1 -14  593.86   10.49   0  0.13766
   2   2 -20  267.86    7.78   0  0.18484
   2   3 -23   18.55    6.78   0  0.21021
   2   5   8 1381.69   10.28   0  0.15314
   2   6   9   56.82    7.45   0  0.15696
   2   7  10   64.86    7.70   0  0.15731
   2   8  10  814.60    9.68   0  0.15925
   2   9  10  106.62    8.71   0  0.15874
   3   2 -15  872.26   11.82   0  0.14000
   3   3 -20   12.85    6.99   0  0.18803
   3   3 -19   94.40    9.03   0  0.18107
   3   3   1  137.34   10.29   0  0.11188
   3   4 -22  164.36    8.92   0  0.20539
   3   5   5  212.33    8.73   0  0.13755
   3   6   6  205.81    6.45   0  0.14185
   3   7   7  -12.37    8.03   0  0.14370
   3   8   7  237.82    9.10   0  0.14392
   3   9   7   41.86    9.23   0  0.14246
   4   3 -13  107.78   13.56   0  0.12599
   4   4 -18  490.41   10.96   0  0.17679
   4   4  -1  734.48   13.63   0  0.10251
   4   5 -21   14.46    7.04   0  0.20137
   4   5   2  981.02   12.65   0  0.11335
   4   6   3    6.33    8.78   0  0.12344
   4   7   4 1039.79   11.86   0  0.12549
   4   8   4   18.01    9.68   0  0.12572
   4   9   4  426.59   11.33   0  0.12742
   4  10   4   -0.95   11.22   0  0.12827
   5   5 -15   16.86   12.67   0  0.15527
   5   5  -4  691.96   19.11   0  0.08376
   5   6  -1   15.69   14.99   0  0.08945
   5   7 -19   -0.12   11.47   0  0.19434
   5   7   0   99.13   11.79   0  0.09780
   5   8   0  461.91   12.58   0  0.10713
   5   9   0  597.26   13.55   0  0.10962
   5  10   0  205.27   13.32   0  0.11206
   6   7  -9    0.76   16.14   0  0.10511
   6   7  -8    9.29   16.68   0  0.10027
   6   8  -7    4.58   14.99   0  0.10210
   6   8  -6   58.78   15.43   0  0.09887
   6   9  -8   20.89   15.15   0  0.10998
   6   9  -7    4.38   15.35   0  0.10727
   6   9  -6   30.13   15.94   0  0.10374
 -14  -3   0  118.98   14.56   0  0.12840
 -14  -3   1   -0.59   10.86   0  0.13793
 -13  -3   1   15.75   12.98   0  0.13267
 -13  -3   2  399.62   12.01   0  0.13775
 -13   0  15    2.86   11.22   0  0.18998
 -12  -3   2  954.37   15.94   0  0.13637
 -12   0  15    3.20   10.86   0  0.18740
 -12   1  17    8.26    9.05   0  0.20206
 -11  -3   2  969.77   15.15   0  0.13726
 -11   1  17  140.48    9.27   0  0.19942
 -10  -3 -15   31.23    8.76   0  0.16877
 -10  -3   2  609.43   13.15   0  0.13825
  -9  -3 -16  117.86    8.73   0  0.17401
  -9  -3 -15   17.22    8.44   0  0.16763
  -9  -3   1   86.03   11.09   0  0.13442
  -9  -2   7  418.97   17.92   0  0.14533
  -9   0  14  624.09   11.16   0  0.18736
  -9   1  16  719.00    9.16   0  0.19947
  -8  -3 -16  494.06    7.34   0  0.17275
  -8  -3 -15   -5.45    8.45   0  0.16648
  -8  -3 -14 1895.00   12.35   0  0.16064
  -8  -3   0 1542.54   15.73   0  0.13107
  -7  -3 -15   58.74    5.70   0  0.16502
  -7  -3 -14   68.57    8.18   0  0.15894
  -7  -3 -13    9.94    8.18   0  0.15276
  -7  -3  -2 1665.82   15.84   0  0.12377
  -7  -3  -1    6.63    8.54   0  0.13338
  -7  -2 -21   -2.47    7.61   0  0.19950
  -7  -2 -20  123.02    7.97   0  0.19430
  -7   1  15   74.36    8.42   0  0.19056
  -7   3  18 1731.83   10.13   0  0.20471
  -6  -3 -13   36.98    5.89   0  0.15044
  -6  -3 -12   78.48    8.40   0  0.14378
  -6  -3 -11   -4.07    8.57   0  0.13752
  -6  -3 -10 2334.26   13.88   0  0.13183
  -6  -3  -9   36.60    9.36   0  0.12496
  -6  -3  -6 1484.49   13.91   0  0.11323
  -6  -3  -5   33.18    9.99   0  0.11382
  -6  -3  -4 1122.86   12.57   0  0.12157
  -6  -2 -20  812.96    9.44   0  0.19391
  -6  -2   4  377.39   14.58   0  0.13995
  -6   1  14 1944.42   12.07   0  0.18692
  -6   4  18  613.00    6.30   0  0.20786
  -5  -2 -19  203.96    7.95   0  0.18687
  -5  -2 -18  734.88    8.93   0  0.18087
  -5  -1 -23    8.91    7.14   0  0.20665
  -5   1  13 1010.56    9.90   0  0.18175
  -4  -2 -18   11.62    5.30   0  0.17886
  -4  -2 -17  140.73    7.64   0  0.17297
  -4  -2   0 1047.06   15.55   0  0.12942
  -4  -1 -23  102.11    5.32   0  0.20695
  -4  -1 -22  671.82    8.49   0  0.20078
  -4   4  16   95.49    4.80   0  0.19943
  -3  -2 -15  372.69    8.74   0  0.15714
  -3  -2 -14  227.52    8.55   0  0.15138
  -3  -2 -13    9.75    8.29   0  0.14422
  -3  -2  -3  119.02   10.07   0  0.12077
  -3  -1 -21  139.58    7.32   0  0.19470
  -3   0 -25   -2.22    6.94   0  0.21438
  -3   3  14 4255.29   13.85   0  0.18627
  -2  -1 -19  384.55    7.99   0  0.18116
  -2  -1   1 1123.25   23.47   0  0.12718
  -2   0 -24  297.32    5.98   0  0.20930
  -2   0 -23    0.57    6.77   0  0.20376
  -2   2  11   80.41    6.79   0  0.17205
  -2   6  15   53.73    4.81   0  0.19464
  -2   8  16   12.77    7.29   0  0.19735
  -1  -1 -17  213.24    5.94   0  0.16577
  -1  -1 -16  959.91    9.57   0  0.15883
  -1  -1 -15    6.93    7.74   0  0.15287
  -1   0 -22 1717.21   10.42   0  0.19665
  -1   0 -21   16.50    7.05   0  0.19214
  -1   1 -25   85.66    6.96   0  0.21763
  -1   2   9  118.22    7.39   0  0.16620
  -1   3  11   93.23    7.00   0  0.17353
  -1   7  14  732.23    6.72   0  0.18938
  -1   8  15  157.66    7.78   0  0.18859
  -1   9  14  754.60    7.32   0  0.18923
   0   0 -19    2.23    7.30   0  0.17600
   0   1 -23  170.83    7.20   0  0.20407
   0   1   4 1819.03   16.78   0  0.14486
   0   2 -26   60.49    6.98   0  0.22648
   0   2   7  181.85    8.02   0  0.15316
   0   3   9    6.57    6.68   0  0.16421
   0   4  10 1661.22    9.07   0  0.17043
   0   6  12  211.90    7.16   0  0.17930
   0   7  13  100.25    7.39   0  0.17955
   0   8  13  100.38    7.47   0  0.18142
   0   9  13   21.04    7.82   0  0.18061
   1   0 -15    0.31    8.11   0  0.14511
   1   0 -14  404.79    9.75   0  0.13865
   1   0 -13    2.73    8.67   0  0.13034
   1   0  -5   21.06   11.68   0  0.10955
   1   1 -21  184.77    7.44   0  0.18858
   1   1 -20 1077.95    9.73   0  0.18124
   1   1   1  490.44   14.85   0  0.12874
   1   2 -24  145.62    7.22   0  0.21408
   1   4   8 2612.84   11.47   0  0.16074
   1   6  10   97.61    5.12   0  0.16857
   1   7  11    9.30    7.01   0  0.17077
   1   8  11  215.97    7.93   0  0.17236
   1   9  11   28.32    8.22   0  0.17124
   2   1 -17   39.09    7.88   0  0.15495
   2   1 -16 2340.49   14.15   0  0.14928
   2   1  -4  305.03   27.10   0  0.09860
   2   2 -21  282.75    7.63   0  0.19246
   2   2   1   10.91    9.48   0  0.12539
   2   3 -24    1.01    6.69   0  0.21483
   2   3   4 1874.64   13.72   0  0.13554
   2   4   6 1127.10   10.50   0  0.14522
   2   5   7  602.31    8.67   0  0.15380
   2   6   8  729.24    8.86   0  0.15718
   2   7   9  151.22    7.98   0  0.15682
   2   8   9   55.88    8.02   0  0.15848
   2   9   9    9.23    8.42   0  0.15669
   2  10   8   19.49    6.49   0  0.15436
   3   2 -17   -1.17    7.93   0  0.15587
   3   2 -16 2857.17   17.66   0  0.14733
   3   3 -21   30.46    6.98   0  0.19537
   3   4 -23   76.84    8.54   0  0.21227
   3   4   3   15.61    8.35   0  0.12781
   3   5   4   37.26    7.89   0  0.13737
   3   6   5   17.20    5.66   0  0.14132
   3   7   6  827.28   10.05   0  0.14429
   3   8   6  216.22    9.18   0  0.14267
   3   9   6  535.06   10.54   0  0.14093
   3  10   6   62.57   10.38   0  0.13996
   4   3 -15   21.91   10.24   0  0.14183
   4   3 -14   23.61   12.49   0  0.13335
   4   3  -5   27.21   18.38   0  0.09038
   4   4 -19   49.06    9.03   0  0.18345
   4   5   1  168.62    9.98   0  0.11300
   4   6   2  859.65   11.68   0  0.12220
   4   7   3   41.43    9.49   0  0.12300
   4   8   3  145.57   10.14   0  0.12385
   4   9   3   21.69   10.21   0  0.12644
   4  10   2  189.26   11.72   0  0.12501
   4  10   3   -3.34   11.04   0  0.12742
   5   5  -5  328.31   17.69   0  0.08424
   5   6 -18   10.19   11.87   0  0.18397
   5   6  -3   22.70   12.28   0  0.09009
   5   6  -2   47.15   15.29   0  0.08842
   5   7  -1  117.29   14.29   0  0.09920
   5   8  -1  257.40   12.50   0  0.10485
   5   9  -1    4.45   11.97   0  0.10926
   5  10  -2  277.09   13.93   0  0.11053
   6   7 -11   57.20   17.80   0  0.12536
   6   7 -10  667.88   21.95   0  0.10966
   6   8 -10    2.88   13.85   0  0.11229
   6   8  -9   48.54   14.15   0  0.10894
   6   8  -8  191.11   17.39   0  0.10537
   6   9 -10    3.08   14.50   0  0.11634
   6   9  -9    8.64   14.82   0  0.11320
 -14  -3   2  964.69   16.73   0  0.14194
 -13  -3   3    0.19    9.35   0  0.14958
 -13  -2   8  855.45   20.58   0  0.15861
 -12  -3   3   34.78   11.52   0  0.14700
 -12  -2   8   72.42   15.77   0  0.15471
 -11  -3   3   11.87   10.58   0  0.14821
 -11  -2   8 1128.62   22.88   0  0.15658
 -11  -1  12  664.01   20.11   0  0.17686
 -11   2  18  990.53    9.78   0  0.21324
 -10  -3   3    6.17    8.22   0  0.15164
 -10   1  16   60.53    6.83   0  0.20666
 -10   3  19    9.79    6.84   0  0.21445
  -9  -3 -17    5.09    8.20   0  0.17967
  -9  -3   2  994.61   13.95   0  0.14525
  -8  -3 -19    1.60    5.49   0  0.19034
  -8  -3 -18  617.04    9.52   0  0.18498
  -8  -3 -17    3.13    8.04   0  0.17815
  -8  -3   1    8.63    9.90   0  0.14154
  -8   0  13    5.53    8.17   0  0.18910
  -8   1  15  518.26    8.36   0  0.20166
  -8   3  18  300.89    7.17   0  0.21299
  -7  -3 -18   26.83    5.63   0  0.18337
  -7  -3 -17    2.88    7.75   0  0.17719
  -7  -3 -16  406.80    8.72   0  0.17118
  -7  -3   0  987.72   11.95   0  0.14155
  -7   2  16  774.66    8.37   0  0.20485
  -6  -3 -16  144.58    5.93   0  0.16897
  -6  -3 -15   25.33    7.87   0  0.16254
  -6  -3 -14 2386.16   12.57   0  0.15676
  -6  -3  -3    3.48    8.70   0  0.12714
  -6  -3  -2  474.37    9.92   0  0.13540
  -6  -2 -22  435.97    8.60   0  0.20534
  -6  -2 -21  113.14    7.75   0  0.19918
  -5  -3 -14  717.77    7.66   0  0.15369
  -5  -3 -13   -3.08    8.04   0  0.14725
  -5  -3 -12  192.31    8.84   0  0.14025
  -5  -3 -11   35.85    8.75   0  0.13444
  -5  -3 -10 1775.56   12.88   0  0.12747
  -5  -3  -9   89.61    9.46   0  0.12041
  -5  -3  -8  181.06   10.03   0  0.11640
  -5  -3  -7   31.02    9.63   0  0.11681
  -5  -3  -6 2053.04   14.62   0  0.11904
  -5  -3  -5  143.05    9.32   0  0.12548
  -5  -2 -21   -7.56    7.27   0  0.19780
  -5  -2 -20   40.46    7.36   0  0.19222
  -5   7  18  259.55    5.53   0  0.21356
  -4  -2 -20 1622.54    8.84   0  0.19098
  -4  -2 -19   27.73    7.40   0  0.18476
  -4  -1 -24   79.83    7.41   0  0.21274
  -4   0   9   10.16    8.20   0  0.17055
  -4   2  13  640.39    7.89   0  0.19247
  -4   7  17    0.85    4.65   0  0.20921
  -3  -2 -18  533.78    6.76   0  0.17644
  -3  -2 -17  122.35    7.77   0  0.16963
  -3  -2 -16  457.23    8.53   0  0.16402
  -3  -2  -2 3127.10   19.63   0  0.13060
  -3  -1 -23    8.37    7.04   0  0.20649
  -3  -1 -22  154.99    7.39   0  0.20033
  -3   1  10  793.51    9.31   0  0.17486
  -3   2  12 2424.95   11.99   0  0.18238
  -3   3  13   52.29    4.62   0  0.19229
  -3   5  15    9.32    4.26   0  0.20058
  -3   7  16   13.87    4.69   0  0.20432
  -3   8  16  603.87    6.48   0  0.20444
  -2  -2 -14 1792.29   10.39   0  0.14550
  -2  -2 -13  282.04    9.31   0  0.13789
  -2  -2 -12 1151.41   11.55   0  0.13105
  -2  -2 -11    2.05    9.31   0  0.12307
  -2  -2 -10 2851.01   16.16   0  0.11843
  -2  -2  -9  963.51   12.64   0  0.11361
  -2  -2  -8   72.95    9.70   0  0.11572
  -2  -2  -7  118.43    9.91   0  0.11871
  -2  -2  -6 3400.27   17.23   0  0.11976
  -2  -1 -21   -3.62    7.11   0  0.19271
  -2  -1 -20  405.47    7.82   0  0.18734
  -2   0 -25    1.22    6.89   0  0.21600
  -2   1   8 2358.54   13.98   0  0.17109
  -2   2  10  728.29    7.28   0  0.17872
  -2   3  12  546.10    7.69   0  0.18204
  -2   8  15    3.11    7.13   0  0.19860
  -1  -1 -19    3.96    5.18   0  0.17799
  -1  -1 -18  317.36    7.94   0  0.17185
  -1  -1  -2  820.29   16.35   0  0.12622
  -1   0 -23    1.36    7.09   0  0.20108
  -1   0   3    1.62   10.06   0  0.14542
  -1   1   6  694.57    9.11   0  0.16173
  -1   3  10 3612.59   12.73   0  0.17717
  -1   8  14   33.22    7.24   0  0.18967
  -1   9  13   86.34    5.63   0  0.19020
   0  -1 -14    2.54    5.90   0  0.13843
   0  -1 -13   27.09    8.74   0  0.13117
   0  -1 -12 4298.91   18.64   0  0.12353
   0  -1 -11  752.36   11.72   0  0.11734
   0  -1 -10 1059.08   13.32   0  0.11208
   0  -1  -9  562.51   11.91   0  0.11371
   0  -1  -8 3455.25   19.92   0  0.11463
   0   0 -21   -6.78    7.00   0  0.18794
   0   0 -20  569.61    8.42   0  0.18262
   0   1 -25    4.25    4.80   0  0.21825
   0   1 -24  123.69    7.17   0  0.21135
   0   3   8 1411.23    9.16   0  0.16812
   0   6  11   38.38    4.74   0  0.18052
   0   7  12 1600.17    9.91   0  0.18079
   0   8  12    8.00    7.15   0  0.18270
   0   9  12  294.24    8.31   0  0.18019
   1   0 -17    4.28    7.68   0  0.15785
   1   0 -16  931.44   10.17   0  0.15201
   1   1 -22  165.80    7.24   0  0.19594
   1   2 -25   34.94    6.67   0  0.22052
   1   2   4  769.52   11.38   0  0.14372
   1   3   6 2323.36   12.96   0  0.15756
   1   5   9  114.47    7.23   0  0.16508
   1   7  10  634.35    8.38   0  0.17144
   1   8  10   78.36    7.56   0  0.17275
   1   9  10  776.86    9.53   0  0.17021
   2   1 -18   23.21    7.63   0  0.16180
   2   2 -22  254.75    7.37   0  0.19996
   2   3 -25    2.25    6.63   0  0.22446
   2   3   3  165.52    6.16   0  0.14195
   2   4   5  233.13    7.80   0  0.15059
   2   5   6  699.43    7.39   0  0.15455
   2   6   7  112.82    7.34   0  0.15737
   2   7   8 1398.95   10.53   0  0.15690
   2   8   8    3.90    7.70   0  0.15895
   2   9   8  301.89    9.17   0  0.15588
   2  10   7   16.46    9.13   0  0.15395
   3   2 -18    7.89    7.73   0  0.16223
   3   3 -22 1367.77   10.85   0  0.20255
   3   3   0 5656.59   28.02   0  0.11733
   3   4 -24  392.78    8.39   0  0.21954
   3   4   2 1799.75   13.59   0  0.13252
   3   7   5  225.07    8.63   0  0.14398
   3   8   5   -1.47    8.83   0  0.14018
   3   9   5   79.84    9.52   0  0.14002
   3  10   4  388.07   11.16   0  0.13905
   3  10   5   73.08   10.23   0  0.13948
   4   3 -16  156.87   10.38   0  0.14962
   4   4 -20   34.53    8.84   0  0.19055
   4   4  -2  580.67   15.22   0  0.10299
   4   5 -22   21.52    8.55   0  0.20871
   4   5   0  631.28   11.83   0  0.11395
   4   6   1   18.17    8.91   0  0.12190
   4   7   2  619.52   11.09   0  0.12174
   4   8   2  622.40   11.43   0  0.12403
   4   9   2    3.67   10.30   0  0.12380
   4  10   1  115.93   11.67   0  0.12367
   5   5 -16  218.91   13.80   0  0.16269
   5   6 -19   27.79   10.48   0  0.19028
   5   7  -3  135.39   11.76   0  0.10050
   5   7  -2  516.57   15.64   0  0.09991
   5   8  -2  730.29   14.22   0  0.10346
   5   9  -3   64.56   12.09   0  0.10818
   5   9  -2  129.41   15.21   0  0.10750
   6   8 -13    1.45   17.07   0  0.14653
   6   8 -12   51.75   16.07   0  0.13295
   6   8 -11    9.28   17.70   0  0.11620
 -14  -3   3   18.00   12.27   0  0.14948
 -12  -4  -9    4.91   11.38   0  0.13013
 -12  -4  -8  646.55   13.79   0  0.12231
 -12  -4  -7   -7.96   11.43   0  0.12319
 -12  -4  -6    3.36   10.82   0  0.12866
 -12  -4  -5   29.13   10.76   0  0.13133
 -11  -4 -12   35.48    9.90   0  0.14864
 -11  -4 -11   71.33   10.38   0  0.14198
 -11  -4 -10  236.91   11.15   0  0.13596
 -11  -4  -9   40.27   10.73   0  0.12949
 -11  -4  -8   29.02   10.93   0  0.12140
 -11  -4  -7  137.35   11.39   0  0.12184
 -11  -4  -6  336.91   11.53   0  0.12620
 -11  -4  -5  132.86   10.60   0  0.13151
 -11   1  16  652.23    9.26   0  0.20943
 -10  -4 -13   26.10    6.69   0  0.15389
 -10  -4 -12  701.36   11.71   0  0.14759
 -10  -4 -11  -10.95    9.51   0  0.14121
 -10  -4 -10   13.90   10.03   0  0.13465
 -10  -4  -9   37.08   10.39   0  0.12784
 -10  -4  -8  954.04   13.44   0  0.12118
 -10  -4  -7   13.80   10.24   0  0.12447
 -10  -4  -6  163.73   10.27   0  0.12913
 -10  -4  -5   94.30    9.93   0  0.13200
 -10   0  14   96.87   10.00   0  0.19648
  -9  -4 -12   24.99    6.68   0  0.14612
  -9  -4 -11   77.59    9.68   0  0.13925
  -9  -4 -10  633.50   11.32   0  0.13226
  -9  -4  -9   49.48   10.31   0  0.12412
  -9  -4  -8  148.45   10.35   0  0.12484
  -9  -4  -7  112.62    9.89   0  0.12708
  -9  -4  -6  320.29    7.79   0  0.12942
  -9  -1  11   12.47   11.08   0  0.18104
  -9   3  18  717.43    8.24   0  0.21749
  -9   4  19   61.67    6.71   0  0.22026
  -8  -3   2  125.48    8.53   0  0.15145
  -7  -3 -20  147.63    5.94   0  0.19532
  -7  -3 -19   11.36    7.58   0  0.18946
  -7   0  12  737.17   10.98   0  0.18962
  -7   1  14  108.63    6.64   0  0.19879
  -6  -3 -19    7.35    5.44   0  0.18760
  -6  -3 -18 1471.55   10.96   0  0.18130
  -6  -3 -17    8.02    7.63   0  0.17501
  -6  -3  -1   98.78    8.16   0  0.14230
  -6   0  11    5.15    8.02   0  0.18756
  -6   1  13   84.31    6.39   0  0.19705
  -6   3  16  175.25    6.49   0  0.20789
  -6   4  17  191.04    6.55   0  0.21213
  -5  -3 -17   42.82    5.57   0  0.17275
  -5  -3 -16  471.44    8.81   0  0.16599
  -5  -3 -15   56.09    8.15   0  0.16066
  -5  -3  -4 1178.31   12.33   0  0.12808
  -5  -3  -3    0.07    8.13   0  0.13703
  -5  -2 -23   60.24    7.31   0  0.20938
  -5  -2 -22  350.59    8.14   0  0.20367
  -5  -2   3  911.21   15.70   0  0.15099
  -5   0  10 1570.98   13.94   0  0.17997
  -5   1  12 1415.95   10.43   0  0.19114
  -5   3  15    3.30    5.95   0  0.20574
  -5   6  17   27.50    4.67   0  0.21410
  -4  -3 -14 1738.06   10.04   0  0.14954
  -4  -3 -13   18.70    8.48   0  0.14237
  -4  -3 -12  373.19    9.50   0  0.13490
  -4  -3 -11   -4.00    8.85   0  0.12825
  -4  -3 -10 1350.49   12.54   0  0.12106
  -4  -3  -9    9.61    9.07   0  0.12246
  -4  -3  -8  903.25   11.45   0  0.12324
  -4  -3  -7  160.48    6.91   0  0.12422
  -4  -2 -22  237.43    5.83   0  0.20241
  -4  -2 -21  217.04    7.64   0  0.19652
  -4  -2   1 1331.86   16.60   0  0.14408
  -4   1  11  206.08    7.01   0  0.18302
  -4   3  14   27.30    6.29   0  0.19757
  -4   4  15   24.09    6.07   0  0.20422
  -4   6  16  335.06    5.38   0  0.20986
  -3  -2 -20   24.67    5.03   0  0.18850
  -3  -2 -19  149.12    7.47   0  0.18267
  -3  -1 -25   23.77    5.07   0  0.21699
  -3  -1 -24  559.92    8.31   0  0.21118
  -3   0   7   13.63    7.06   0  0.16903
  -3   2  11 1441.17    8.93   0  0.18807
  -3   7  15   17.47    4.56   0  0.20514
  -3   8  15  173.90    5.31   0  0.20499
  -2  -2 -17  215.48    5.90   0  0.16524
  -2  -2 -16 1310.82   10.38   0  0.15845
  -2  -2 -15    4.06    7.90   0  0.15256
  -2  -2  -5  182.66    9.76   0  0.12687
  -2  -1 -23  156.45    7.44   0  0.20432
  -2  -1 -22  838.99    8.85   0  0.19870
  -2   3  11   30.50    4.41   0  0.18727
  -2   5  13   51.05    4.49   0  0.19605
  -2   8  14  488.85    7.87   0  0.19943
  -1  -1 -20 1344.35    9.95   0  0.18411
  -1   0 -25   -1.18    4.82   0  0.21598
  -1   0 -24  134.07    7.25   0  0.20827
  -1   2   8 1812.47   11.79   0  0.17101
  -1   6  12  288.37    5.28   0  0.19064
  -1   8  13   18.65    7.17   0  0.19157
  -1   9  12  124.82    5.54   0  0.18996
   0  -1 -17    9.65    5.49   0  0.15853
   0  -1 -16 2323.35   12.97   0  0.15095
   0  -1 -15  672.72    9.84   0  0.14603
   0  -1  -7  353.32   11.98   0  0.11440
   0  -1  -6 3214.55   19.47   0  0.11894
   0   0 -22  865.67    8.95   0  0.19414
   0   1 -26  273.37    7.69   0  0.22514
   0   2   6 1539.52   12.06   0  0.15922
   0   4   9  615.27    8.03   0  0.17483
   0   7  11  106.96    6.85   0  0.18277
   0   8  11   10.24    6.95   0  0.18318
   0   9  11   78.45    7.91   0  0.17962
   1   0 -19    0.74    7.19   0  0.16995
   1   0 -18  733.57    9.33   0  0.16449
   1   1 -23   68.51    7.03   0  0.20366
   1   2 -26  384.76    7.78   0  0.22731
   1   4   7   77.02    6.99   0  0.16170
   1   5   8   30.16    6.69   0  0.16739
   1   6   9    1.42    6.83   0  0.16812
   1   7   9  297.58    7.52   0  0.17233
   1   8   9    0.89    7.53   0  0.17004
   1   9   9   97.90    8.24   0  0.16829
   2   1 -20 1220.29   10.37   0  0.17513
   2   1 -19  180.49    7.91   0  0.16799
   2   2 -24  467.73    8.07   0  0.21366
   2   2 -23    8.82    6.76   0  0.20675
   2   6   6 1280.95    8.79   0  0.15672
   2   7   7   49.20    7.56   0  0.15681
   2   8   7   74.44    7.93   0  0.15607
   2   9   7   16.39    8.57   0  0.15417
   2  10   6  193.32    9.56   0  0.15296
   3   2 -20 2182.85   13.05   0  0.17897
   3   2 -19  202.62    9.71   0  0.17184
   3   2  -4  261.30   22.97   0  0.10044
   3   3 -23   23.19    6.76   0  0.20900
   3   5   3  463.84    9.41   0  0.13681
   3   6   4  677.02    9.88   0  0.14047
   3   7   4   62.06    8.04   0  0.14208
   3   8   4  850.31   10.82   0  0.13985
   3   9   4  517.56   10.69   0  0.13747
   3  10   3    3.60   10.15   0  0.13785
   4   3 -18  137.52    7.98   0  0.16537
   4   3 -17   24.53    9.35   0  0.15709
   4   4 -21  194.31    9.55   0  0.19694
   4   5 -23   64.85    8.88   0  0.21494
   4   5  -1  433.18   10.91   0  0.11603
   4   6   0 1365.04   13.30   0  0.12000
   4   7   1   31.22    9.44   0  0.11923
   4   8   1   -0.74    9.82   0  0.12026
   4   9   0  287.45   11.23   0  0.12205
   4   9   1    4.79   10.39   0  0.12270
   4  10  -1   30.21   11.43   0  0.12158
   4  10   0   48.57   11.46   0  0.12168
   5   5 -17   83.27   12.60   0  0.16791
   5   5  -6  212.49   18.85   0  0.08703
   5   6  -4  750.47   17.60   0  0.09080
   5   7  -4  330.49   12.87   0  0.09982
   5   8  -4   84.11   11.84   0  0.10338
   5   8  -3  113.06   14.79   0  0.10253
   5   9  -4  816.81   15.06   0  0.10612
 -14  -2   8  116.57   16.57   0  0.16690
 -13  -4  -4    2.56   10.96   0  0.13638
 -13  -4  -3  109.54   10.86   0  0.14074
 -13  -3   4   12.64   10.72   0  0.16090
 -13   1  16  329.01   10.19   0  0.21422
 -12  -4  -4 1194.09   16.33   0  0.13423
 -12  -4  -3    4.54   10.25   0  0.13717
 -12  -4  -2  153.74   10.15   0  0.14596
 -12  -3   4 1426.95   17.67   0  0.15860
 -12   1  16    7.71    8.44   0  0.21218
 -11  -4  -4  206.48   12.66   0  0.13469
 -11  -4  -3  223.13   10.42   0  0.13763
 -11  -4  -2  142.49    9.60   0  0.14643
 -11  -3   4  208.33   10.92   0  0.16094
 -11   0  14  367.98   11.03   0  0.20345
 -11   2  17    2.97    6.62   0  0.21951
 -10  -4 -14  239.30    9.76   0  0.16103
 -10  -4  -4 1022.58   12.51   0  0.13488
 -10  -4  -3   19.81    9.13   0  0.13963
 -10   3  18  248.78    7.25   0  0.22122
  -9  -4 -16   85.58    8.75   0  0.17165
  -9  -4 -15  143.70    9.05   0  0.16511
  -9  -4 -14  318.11    9.62   0  0.15978
  -9  -4 -13   80.85    9.15   0  0.15314
  -9  -4  -5  134.00    9.42   0  0.13217
  -9  -4  -4  823.05   11.22   0  0.13778
  -9  -3   3   43.92    9.66   0  0.15716
  -9   0  13    2.06    7.69   0  0.20358
  -9   1  15    4.98    7.83   0  0.20756
  -8  -4 -15   10.13    8.54   0  0.16380
  -8  -4 -14  161.00    9.08   0  0.15670
  -8  -4 -13   68.72    8.83   0  0.15108
  -8  -4 -12 1145.81   11.77   0  0.14489
  -8  -4 -11    3.38    8.92   0  0.13775
  -8  -4 -10   39.76    9.33   0  0.13063
  -8  -4  -9   87.94    9.84   0  0.12488
  -8  -4  -8 1199.00   12.84   0  0.12535
  -8  -4  -7   14.53    9.38   0  0.12723
  -8  -4  -6  273.55    9.77   0  0.13174
  -8  -4  -5  112.20    8.83   0  0.13773
  -8   3  17   12.24    6.08   0  0.21770
  -7  -4 -13   88.39    6.48   0  0.14795
  -7  -4 -12  245.11    9.51   0  0.14078
  -7  -4 -11  148.02    9.53   0  0.13337
  -7  -4 -10  519.52   10.53   0  0.12820
  -7  -4  -9   44.13    9.25   0  0.12873
  -7  -4  -8  497.03   10.32   0  0.12965
  -7  -3   1    6.16    9.48   0  0.15233
  -7   2  15  688.93    7.78   0  0.21187
  -6  -3 -21    5.80    7.54   0  0.20009
  -6  -3 -20  508.98    8.75   0  0.19410
  -6  -3   0 2457.28   15.46   0  0.15375
  -6   2  14  174.93    6.28   0  0.20902
  -5  -3 -20  280.81    6.10   0  0.19172
  -5  -3 -19   34.22    7.65   0  0.18574
  -5  -3 -18   85.27    7.76   0  0.17966
  -5  -3  -2 2072.42   14.09   0  0.14628
  -5   2  13   13.59    5.89   0  0.20445
  -4  -3 -17   38.04    7.72   0  0.16914
  -4  -3 -16    6.97    7.70   0  0.16317
  -4  -3 -15   -2.24    7.97   0  0.15596
  -4  -3  -6  204.85    9.16   0  0.12740
  -4  -3  -5  317.11    9.07   0  0.13591
  -4  -2 -24  413.59    6.46   0  0.21389
  -4  -2 -23    8.33    6.94   0  0.20763
  -4   2  12  685.87    7.88   0  0.19901
  -3  -2 -22  503.61    8.14   0  0.20030
  -3  -2 -21   42.46    7.03   0  0.19466
  -3  -2  -1  578.85   11.42   0  0.14175
  -3   1   9  222.17    7.04   0  0.18390
  -3   3  12 3108.76   12.20   0  0.19855
  -3   6  14   18.04    4.27   0  0.20728
  -3   9  14  605.33    6.65   0  0.20609
  -2  -2 -20 1659.33    8.96   0  0.18513
  -2  -2 -19   -5.43    7.18   0  0.17877
  -2  -2 -18  189.74    7.66   0  0.17276
  -2  -2  -4 1560.26   14.26   0  0.13271
  -2  -1 -25   13.27    4.97   0  0.21556
  -2  -1 -24    2.39    6.85   0  0.21019
  -2   0   5  104.47   10.08   0  0.16380
  -2   2   9  262.94    5.49   0  0.18441
  -2   7  13   55.97    4.71   0  0.20155
  -2   8  13   28.70    4.83   0  0.20121
  -2   9  13   40.67    7.25   0  0.19977
  -1  -2 -15  501.17    7.82   0  0.14505
  -1  -2 -14   16.29    8.59   0  0.13747
  -1  -2 -13   48.66    9.16   0  0.12956
  -1  -2 -12 3334.35   16.60   0  0.12175
  -1  -2 -11  739.28   11.80   0  0.12210
  -1  -2 -10  428.40   10.46   0  0.12259
  -1  -2  -9  -12.98    6.95   0  0.12312
  -1  -1 -22   16.03    6.99   0  0.19589
  -1  -1 -21  265.14    7.58   0  0.19006
  -1   0 -26  433.49    7.95   0  0.22237
  -1   3   9   30.91    6.23   0  0.18248
  -1   8  12  752.99    8.35   0  0.19132
  -1   9  11   23.12    5.16   0  0.19126
   0  -1 -19  279.25    7.99   0  0.17162
   0  -1 -18  444.88    8.50   0  0.16618
   0  -1  -5  287.33    8.99   0  0.12747
   0   0 -24  497.65    8.04   0  0.20660
   0   0 -23    0.34    6.80   0  0.20020
   0   3   7   18.82    6.26   0  0.17293
   0   5   9   10.20    4.42   0  0.18137
   0   7  10  340.41    7.24   0  0.18478
   0   8  10  643.28    8.02   0  0.18438
   0   9  10   21.17    7.62   0  0.18062
   0  10   9  175.04    6.24   0  0.17800
   1   0 -21    8.92    7.22   0  0.18284
   1   0 -20  144.27    7.67   0  0.17702
   1   0  -4  685.30   18.29   0  0.12203
   1   1 -25   83.67    6.95   0  0.21771
   1   1 -24  701.32    8.64   0  0.21073
   1   2   3  648.99   10.64   0  0.15418
   1   3   5  100.63    7.38   0  0.15872
   1   4   6 1212.36    8.54   0  0.16632
   1   5   7   87.73    4.82   0  0.16941
   1   6   8  541.82    8.01   0  0.16989
   1   7   8    7.99    6.70   0  0.17354
   1   8   8  631.28    8.69   0  0.17260
   1   9   8  290.70    8.50   0  0.16846
   1  10   7   -4.25    8.68   0  0.16387
   2   0 -14 3361.36   17.95   0  0.12355
   2   0 -13    8.53    9.74   0  0.11411
   2   0 -12 1245.57   14.07   0  0.11321
   2   1 -22  488.55    8.33   0  0.19202
   2   1 -21   20.87    7.02   0  0.18409
   2   2 -25   79.79    6.96   0  0.22059
   2   2   0  494.45   12.14   0  0.13356
   2   3   2  465.11    7.72   0  0.14662
   2   4   4  627.90    9.02   0  0.15070
   2   5   5  227.60    7.50   0  0.15603
   2   7   6  543.17    8.70   0  0.15703
   2   8   6  817.12    9.47   0  0.15639
   2   9   5    8.05    5.90   0  0.15315
   2   9   6    0.16    8.37   0  0.15604
   2  10   5  169.35    9.62   0  0.15131
   3   1 -14 1235.06   14.92   0  0.11648
   3   1 -13  722.31   13.47   0  0.10819
   3   2 -21    5.77    7.10   0  0.18690
   3   3 -24  163.36    7.34   0  0.21597
   3   3  -1    0.02   10.84   0  0.12319
   3   4   1  265.18    8.96   0  0.13321
   3   5   2  573.95    9.48   0  0.14040
   3   6   3   52.82    7.87   0  0.14063
   3   7   3  109.23    8.29   0  0.14171
   3   8   3  268.05    9.54   0  0.13882
   3   9   3   34.06    9.54   0  0.13691
   3  10   2  343.11   10.98   0  0.13618
   4   3 -19    8.51    8.98   0  0.17243
   4   3  -6  276.66   24.00   0  0.09603
   4   4 -22  179.45    9.37   0  0.20332
   4   4  -3  476.14   14.81   0  0.10662
   4   7   0  299.72   10.28   0  0.11922
   4   8   0  231.88   10.51   0  0.12152
   4   9  -1   28.34   10.56   0  0.12161
   4  10  -2   38.54   11.59   0  0.12214
   5   5 -18  303.06   12.78   0  0.17264
   5   5  -7    6.97   17.16   0  0.08997
   5   6 -20   54.75   10.71   0  0.19480
   5   6  -5    8.46   14.15   0  0.09293
   5   7  -5  126.45   12.36   0  0.09919
   5   8  -5   62.21   11.88   0  0.10357
   5   9  -6   21.96   12.31   0  0.10738
   5   9  -5   13.02   14.93   0  0.10690
 -14  -3   4  554.54   15.44   0  0.16307
 -13  -4  -2  248.46   13.03   0  0.14612
 -13  -4  -1  209.02   10.29   0  0.15385
 -13   0  14  130.75   10.51   0  0.20984
 -12  -4  -1   31.18    9.31   0  0.15028
 -12   0  14   66.75    9.83   0  0.20792
 -11  -4  -1  184.74    9.35   0  0.15261
 -10  -4  -2  727.82   12.54   0  0.14792
 -10  -4  -1   28.76    8.17   0  0.15800
 -10  -3   4 1863.74   18.32   0  0.16587
 -10   1  15  197.23    8.28   0  0.21584
  -9  -4  -3  100.16   10.49   0  0.14454
  -9  -4  -2   33.64    7.95   0  0.15368
  -9   2  16  142.94    6.58   0  0.21900
  -9   3  17   38.17    6.23   0  0.22360
  -8  -4 -17   10.87    8.29   0  0.17621
  -8  -4 -16  613.24   10.04   0  0.16982
  -8  -4  -4  596.84   10.23   0  0.14157
  -8  -4  -3   21.25    7.87   0  0.15040
  -8  -3   3    8.39    8.89   0  0.16783
  -8  -1  10 3162.49   24.92   0  0.18949
  -8   1  14 2113.26   12.91   0  0.21094
  -7  -4 -18  351.16    6.79   0  0.18068
  -7  -4 -17   20.23    5.81   0  0.17382
  -7  -4 -16    5.18    8.17   0  0.16786
  -7  -4 -15  158.52    8.75   0  0.16151
  -7  -4 -14  669.41   10.17   0  0.15461
  -7  -4  -7  237.37    9.29   0  0.13250
  -7  -4  -6  138.30    8.76   0  0.13522
  -7  -4  -5  235.75    8.77   0  0.14411
  -7   1  13  225.96    6.67   0  0.21262
  -6  -4 -16 1164.59    8.73   0  0.16512
  -6  -4 -15    2.15    5.71   0  0.15773
  -6  -4 -14   11.35    8.12   0  0.15149
  -6  -4 -13  139.87    8.90   0  0.14324
  -6  -4 -12 1170.89   11.57   0  0.13624
  -6  -4 -11    4.27    9.07   0  0.13029
  -6  -4 -10  189.96    9.40   0  0.13142
  -6  -4  -9   32.88    9.10   0  0.13184
  -6  -4  -8  630.62   10.28   0  0.13523
  -6   3  15   11.71    5.89   0  0.21403
  -6   5  16  845.23    6.27   0  0.22410
  -5  -3 -22   25.25    5.27   0  0.20366
  -5  -3 -21    6.68    7.32   0  0.19762
  -5  -1   7  167.16   12.74   0  0.17439
  -5   3  14 1915.53    9.83   0  0.21055
  -4  -3 -20  346.88    6.26   0  0.18847
  -4  -3 -19   24.91    7.60   0  0.18250
  -4  -3 -18 2158.40   11.56   0  0.17592
  -4  -3  -4 2525.15   14.80   0  0.14001
  -4   0   8 4742.90   21.51   0  0.18646
  -4   1  10 2841.19   13.59   0  0.19593
  -4   3  13  100.80    6.18   0  0.20457
  -3  -3 -17    0.27    5.38   0  0.16448
  -3  -3 -16  224.11    8.55   0  0.15711
  -3  -3 -15   29.19    7.93   0  0.15126
  -3  -3 -14 1814.16   12.03   0  0.14465
  -3  -3 -13   33.08    8.68   0  0.13673
  -3  -3 -12  111.84    8.93   0  0.13096
  -3  -3 -11   44.68    9.20   0  0.12536
  -3  -3 -10 2714.41   15.32   0  0.12600
  -3  -3  -9   -1.22    8.75   0  0.12859
  -3  -3  -8  555.74   10.13   0  0.13167
  -3  -3  -7   66.39    6.21   0  0.13497
  -3  -2 -24   25.69    5.14   0  0.21202
  -3  -2 -23   72.29    7.18   0  0.20622
  -3   9  13   68.25    5.15   0  0.20854
  -2  -2 -22   59.31    5.21   0  0.19711
  -2  -2 -21  287.07    7.68   0  0.19131
  -2  -2  -3  132.73    8.76   0  0.14501
  -2   1   7  347.84    8.00   0  0.18267
  -2   3  10   22.06    5.72   0  0.19567
  -2   6  12  517.03    5.67   0  0.20435
  -2   7  12 1169.58    7.13   0  0.20412
  -2   8  12   63.05    4.82   0  0.20358
  -2   9  12  151.59    7.22   0  0.20210
  -1  -2 -19  227.93    5.95   0  0.17312
  -1  -2 -18  627.59    6.97   0  0.16511
  -1  -2 -17    8.93    7.60   0  0.15952
  -1  -2 -16 1238.29   10.62   0  0.15272
  -1  -2  -8 2401.76   15.35   0  0.12465
  -1  -2  -7  447.93    8.82   0  0.13051
  -1  -1 -24  909.13    8.95   0  0.20730
  -1  -1 -23   76.45    7.03   0  0.20188
  -1  -1  -1  457.39   13.32   0  0.14700
  -1   1   5 1287.99   11.67   0  0.17404
  -1   2   7  476.70    8.03   0  0.18118
  -1   5  10 1124.82    7.23   0  0.19450
  -1   8  11  377.26    7.51   0  0.19288
  -1   9  10  578.10    6.41   0  0.19279
   0  -1 -22  656.33    6.88   0  0.19145
   0  -1 -21    6.09    7.04   0  0.18444
   0  -1 -20  961.46    9.08   0  0.17909
   0   0 -26   95.07    5.21   0  0.22172
   0   0 -25   -1.74    6.78   0  0.21458
   0   1   3 2936.68   20.67   0  0.15777
   0   2   5   10.77    6.85   0  0.17113
   0   7   9  131.32    6.72   0  0.18658
   0   8   9   38.48    6.73   0  0.18622
   0   9   9    8.40    7.56   0  0.18044
   0  10   8   57.57    8.02   0  0.17862
   1  -1 -16  418.89    7.46   0  0.14179
   1  -1 -15    4.83    6.44   0  0.13326
   1  -1 -14 1216.84   12.59   0  0.12521
   1  -1 -13  704.41   11.50   0  0.12021
   1  -1 -12    1.34    6.51   0  0.12041
   1  -1 -11   11.26    6.80   0  0.12069
   1   0 -23    2.84    5.10   0  0.19512
   1   0 -22 1460.30   10.56   0  0.18964
   1   1 -26    7.63    6.63   0  0.22422
   1   6   7   25.82    6.50   0  0.17124
   1   7   7   27.14    4.76   0  0.17466
   1   8   7  412.38    8.14   0  0.17397
   1   9   7    1.25    7.75   0  0.16810
   1  10   6  259.03    8.90   0  0.16658
   2   0 -18 2091.36   11.65   0  0.15267
   2   0 -17    5.59    8.06   0  0.14692
   2   0 -16  102.56    8.48   0  0.13956
   2   0 -15   96.87    8.75   0  0.13228
   2   0 -11  238.80   10.59   0  0.11357
   2   0 -10 2605.62   18.62   0  0.11495
   2   1 -23  141.69    7.16   0  0.20006
   2   2 -26    6.50    6.52   0  0.22706
   2   4   3  461.97    8.33   0  0.15625
   2   5   4 1059.98    9.69   0  0.15952
   2   6   5   52.47    7.29   0  0.15757
   2   7   5  132.89    7.61   0  0.16012
   2   8   5   28.12    7.67   0  0.15618
   2   9   4  343.72    6.96   0  0.15394
   2  10   4   50.11    9.29   0  0.15066
   3   1 -18 1103.79   11.70   0  0.14676
   3   1 -17  387.77    9.71   0  0.14075
   3   1 -16    0.91    8.81   0  0.13328
   3   1 -15    0.34   11.28   0  0.12505
   3   1 -12  246.74   13.64   0  0.10844
   3   1 -11   64.87   12.38   0  0.10848
   3   1 -10  574.11   13.54   0  0.10971
   3   2 -23  130.89    7.21   0  0.20194
   3   2 -22   98.73    8.73   0  0.19507
   3   3 -25    3.83    6.64   0  0.22253
   3   4   0  526.44    9.90   0  0.13664
   3   5   1  108.43    5.83   0  0.14200
   3   6   2   22.76    7.43   0  0.14352
   3   7   2  719.30   10.10   0  0.14198
   3   8   2  501.14    9.91   0  0.13923
   3   9   2  338.97   10.56   0  0.13625
   3  10   1   30.76   10.53   0  0.13424
   4   3 -21    1.89    6.99   0  0.18851
   4   3 -20  390.77   10.25   0  0.18034
   4   4 -23   19.44    8.51   0  0.21013
   4   5  -2 1695.71   17.00   0  0.11629
   4   6  -1   -0.27   10.98   0  0.11979
   4   7  -1   10.78    9.27   0  0.11894
   4   8  -1   40.24    9.90   0  0.12129
   4   9  -2  101.98   10.86   0  0.12147
   4  10  -3   79.02   11.94   0  0.12054
   5   5 -19   25.64   10.84   0  0.17550
   5   6 -21    3.66    9.99   0  0.19805
   5   6  -6  178.68   15.10   0  0.09360
   5   7  -6   49.35   11.76   0  0.09871
   5   8  -6  852.06   15.22   0  0.10297
   5   9  -7   41.69   12.45   0  0.10841
 -13  -4   0  243.29   10.30   0  0.16064
 -13  -3   5    9.03   11.11   0  0.17962
 -12  -4   0  696.09   11.67   0  0.16016
 -12  -3   5    4.52   10.97   0  0.17964
 -11  -4   0  526.19   10.36   0  0.16129
 -11  -3   5    2.88   10.60   0  0.17519
 -11   1  15    6.92    7.61   0  0.22279
 -11   4  18  559.59    7.83   0  0.23462
 -10  -5 -13    0.74    6.91   0  0.14961
 -10  -4   0  428.72    9.53   0  0.16791
 -10  -1  11  464.15   13.29   0  0.20023
 -10   0  13    5.83    7.46   0  0.21295
 -10   3  17   11.76    6.12   0  0.22926
  -9  -4  -1  258.94    8.65   0  0.15994
  -9  -3   4  839.49   13.08   0  0.17525
  -9   1  14   12.33    5.91   0  0.22249
  -8  -4  -2 1367.54   11.60   0  0.15828
  -8   0  12 3162.69   16.91   0  0.20711
  -8   2  15   13.36    7.08   0  0.22039
  -8   3  16    7.34    5.66   0  0.22482
  -7  -4 -19  161.94    8.21   0  0.18757
  -7  -4  -4 1475.65   11.95   0  0.14688
  -7  -4  -3   63.90    7.57   0  0.15671
  -7  -3   2 1290.84   13.85   0  0.16643
  -7  -1   9 1043.83   15.79   0  0.19154
  -7   0  11    5.11    5.81   0  0.20934
  -7   2  14 1516.32    9.35   0  0.22300
  -7   3  15   -1.13    5.55   0  0.22701
  -7   4  16  724.04    7.43   0  0.22580
  -6  -4 -19    7.77    5.51   0  0.18438
  -6  -4 -18  227.93    8.48   0  0.17713
  -6  -4 -17   82.38    8.08   0  0.17223
  -6  -4  -7  129.05    8.81   0  0.13763
  -6  -4  -6  654.30    9.98   0  0.14181
  -6  -4  -5  282.44    6.73   0  0.14955
  -6  -3   1   52.36    7.46   0  0.16550
  -6  -1   8   46.28    9.17   0  0.18731
  -6   1  12  377.56    7.18   0  0.20809
  -5  -4 -17   42.64    5.67   0  0.16873
  -5  -4 -16  307.94    6.70   0  0.16072
  -5  -4 -15  234.68    8.68   0  0.15337
  -5  -4 -14  702.47    9.95   0  0.14579
  -5  -4 -13  124.70    8.83   0  0.13914
  -5  -4 -12  672.38   10.30   0  0.13240
  -5  -4 -11  484.73    9.86   0  0.13336
  -5  -4 -10  116.23    8.57   0  0.13544
  -5  -4  -9  161.64    8.71   0  0.13702
  -5  -4  -8 1615.79   10.50   0  0.13993
  -5  -3  -1  276.28    9.90   0  0.15483
  -5   0   9    4.08    5.74   0  0.20062
  -5   1  11   80.81    5.76   0  0.20600
  -4  -3 -23   -2.06    5.07   0  0.20746
  -4  -3 -22  717.39    8.98   0  0.20085
  -4  -3 -21    2.07    7.31   0  0.19534
  -4  -3  -3  112.13    7.75   0  0.14795
  -4  -2   2  472.04   11.98   0  0.16691
  -4   2  11   19.41    5.72   0  0.20522
  -4   3  12  183.10    4.61   0  0.21350
  -3  -3 -20  481.90    8.37   0  0.18449
  -3  -3 -19   21.84    7.47   0  0.17850
  -3  -3 -18  392.68    8.51   0  0.17202
  -3  -3  -6 2710.51   14.74   0  0.14108
  -3  -2   0 2003.75   17.21   0  0.15701
  -3   2  10 3337.52   13.18   0  0.19732
  -3   3  11   44.31    5.82   0  0.20367
  -3   4  12 2334.64   10.09   0  0.20737
  -3   9  12  458.15    6.11   0  0.21059
  -2  -3 -16  181.66    6.14   0  0.15137
  -2  -3 -15   40.93    6.04   0  0.14323
  -2  -3 -14  621.87    8.02   0  0.13589
  -2  -3 -13   99.88    6.54   0  0.13052
  -2  -3 -12 1006.28    9.23   0  0.13099
  -2  -3 -11   45.11    6.26   0  0.13148
  -2  -2 -24  699.32    7.16   0  0.20920
  -2  -2 -23    6.16    7.09   0  0.20320
  -2   8  11   37.04    4.65   0  0.20593
  -2   9  11   41.56    6.77   0  0.20403
  -1  -2 -21   59.63    5.30   0  0.18589
  -1  -2 -20  410.82    8.08   0  0.18010
  -1  -2  -6 1315.09   12.74   0  0.13849
  -1  -1 -26   59.79    7.07   0  0.21935
  -1  -1 -25   93.12    7.03   0  0.21354
  -1   3   8 3115.63   12.72   0  0.18902
  -1   4   9  277.26    6.70   0  0.19339
  -1   8  10  435.60    7.31   0  0.19755
  -1   9   9   96.55    5.13   0  0.19417
   0  -1 -23  169.82    7.49   0  0.19729
   0  -1  -4 1719.46   16.81   0  0.14116
   0   3   6  629.75    8.11   0  0.18054
   0   5   8 1350.17    9.20   0  0.18404
   0   6   8 1838.24    8.70   0  0.18910
   0   7   8 1632.76    8.25   0  0.18855
   0   8   8  102.49    6.89   0  0.18732
   0   9   8  242.55    7.90   0  0.18158
   0  10   7   18.17    7.87   0  0.17974
   1  -1 -19   31.59    7.78   0  0.16262
   1  -1 -18 1042.17   10.24   0  0.15609
   1  -1 -17  179.02    8.57   0  0.14985
   1  -1 -10 1227.07   13.76   0  0.12088
   1  -1  -9 1272.13   13.37   0  0.12410
   1   0 -25    2.11    4.84   0  0.21222
   1   0 -24    2.84    6.91   0  0.20413
   1   1   0 1781.26   23.01   0  0.15342
   1   3   4 2790.53   14.27   0  0.16460
   1   4   5  141.12    6.74   0  0.16941
   1   5   6  833.19    8.54   0  0.17126
   1   6   6   17.20    4.40   0  0.17693
   1   7   6  483.52    6.25   0  0.17601
   1   8   6  566.28    8.37   0  0.17478
   1   9   6  504.30    8.69   0  0.16844
   1  10   5   10.36    8.18   0  0.16826
   2   0 -20  274.05    8.30   0  0.16593
   2   0 -19   34.69    7.71   0  0.15983
   2   0  -9  187.39   10.61   0  0.11625
   2   1 -25   26.53    6.74   0  0.21515
   2   1 -24  406.05    7.99   0  0.20801
   2   6   4 1747.64   11.05   0  0.16137
   2   7   4  704.84    8.89   0  0.16139
   2   8   4  174.46    7.87   0  0.15818
   2   9   3    8.90    5.73   0  0.15557
   2  10   2   93.42    6.73   0  0.15254
   2  10   3   34.00    9.20   0  0.15160
   3   1 -20  273.27    8.53   0  0.16410
   3   1 -19    2.28    7.84   0  0.15407
   3   1  -9  169.68   11.08   0  0.11192
   3   2 -24  482.73    8.26   0  0.21018
   3   3  -2  445.95   11.15   0  0.13162
   3   6   1   60.94    7.53   0  0.14454
   3   7   1  395.58    7.18   0  0.14168
   3   8   1   37.23    8.45   0  0.14039
   3   9   0  966.44    9.59   0  0.13729
   3   9   1   78.20    9.51   0  0.13700
   3  10  -1   12.21   10.12   0  0.13504
   3  10   0  116.16   10.74   0  0.13422
   4   2 -17  148.07    9.39   0  0.13430
   4   2 -16   30.29    9.52   0  0.12265
   4   2 -15   24.12   12.13   0  0.11340
   4   2 -14  542.01   16.06   0  0.10372
   4   2 -13  479.90   15.85   0  0.10391
   4   3 -22  190.81    7.71   0  0.19550
   4   4 -24   91.77    8.98   0  0.21644
   4   4  -4  656.16   15.51   0  0.11118
   4   5  -3  113.16    9.43   0  0.11890
   4   6  -2  362.16   10.58   0  0.11945
   4   7  -2 1176.40   12.90   0  0.12208
   4   8  -2  143.15   10.31   0  0.12158
   4   9  -3    6.70   10.45   0  0.12185
   4  10  -5   52.80   11.67   0  0.12273
   4  10  -4  140.12   14.71   0  0.12134
   5   5 -20    7.81   10.39   0  0.18494
   5   5  -8  760.80   21.83   0  0.09356
   5   6  -7  112.36   14.45   0  0.09501
   5   7  -7   14.12   11.24   0  0.10054
   5   8  -7  162.42   15.04   0  0.10451
   5   9  -9    4.20   11.91   0  0.11417
   5   9  -8  544.60   16.98   0  0.11108
 -14  -3   5    3.32   11.68   0  0.18013
 -13  -4   1   51.34    8.65   0  0.17172
 -13   1  15   16.33    8.20   0  0.22673
 -13   2  16   28.13    6.58   0  0.23877
 -12  -4   1   89.60   10.39   0  0.17043
 -12   1  15   67.88    7.91   0  0.22783
 -12   2  16  243.21    7.08   0  0.23442
 -12   3  17   61.29    6.50   0  0.23936
 -11  -5  -9  104.79   10.68   0  0.13871
 -11  -5  -8  603.37   11.70   0  0.14358
 -11  -5  -7   31.45    9.43   0  0.14928
 -11  -4   1   50.60    7.87   0  0.17329
 -11   0  13   -0.04    7.34   0  0.22134
 -10  -5 -12   15.51   10.05   0  0.14251
 -10  -5 -11   25.64   10.38   0  0.13543
 -10  -5 -10  285.83   10.96   0  0.13681
 -10  -5  -9    9.36    9.82   0  0.14152
 -10  -5  -8   20.30    9.19   0  0.14683
 -10  -5  -7   32.36    8.98   0  0.14858
 -10   4  17  284.71    6.69   0  0.23947
  -9  -5 -14   49.66    9.43   0  0.15352
  -9  -5 -13   75.33    9.78   0  0.14589
  -9  -5 -12  537.73   11.75   0  0.13881
  -9  -5 -11   19.59    9.52   0  0.13911
  -9  -5 -10   11.23    9.32   0  0.14183
  -9  -5  -9  126.64    9.52   0  0.14432
  -9  -5  -8  719.27    8.82   0  0.14668
  -9  -4   0 1237.68   11.40   0  0.17200
  -9   2  15  294.24    6.58   0  0.22933
  -9   3  16 1547.50    9.23   0  0.23260
  -9   6  17   44.26    4.48   0  0.24152
  -8  -5 -14  224.95    7.21   0  0.15143
  -8  -5 -13   16.71    6.70   0  0.14393
  -8  -5 -12    6.05    6.77   0  0.13924
  -8  -5 -11   27.10    6.55   0  0.13993
  -8  -4  -1   34.26    7.27   0  0.16711
  -8   1  13   47.41    5.72   0  0.22616
  -8   4  16  660.20    7.21   0  0.23468
  -7  -4  -2  193.56    7.77   0  0.16623
  -6  -4 -20  472.11    8.82   0  0.19130
  -6  -4  -4  333.99    8.23   0  0.15842
  -6   0  10  102.55    7.65   0  0.20603
  -6   2  13  619.30    7.36   0  0.21877
  -6   3  14  348.81    6.38   0  0.22349
  -6   5  15  421.91    6.50   0  0.23105
  -6   6  15    6.84    4.10   0  0.23273
  -6   7  15   49.32    4.44   0  0.23226
  -5  -4 -20   19.98    7.70   0  0.18784
  -5  -4 -19  203.18    8.25   0  0.18087
  -5  -4 -18  621.72    9.10   0  0.17542
  -5  -4  -7  513.63    9.65   0  0.14276
  -5  -4  -6   92.55    7.93   0  0.15102
  -5  -3   0 4314.20   18.89   0  0.17108
  -5   2  12  978.44    8.19   0  0.21405
  -5   3  13   83.65    5.73   0  0.22218
  -5   6  14  114.12    4.32   0  0.22830
  -5   7  14  160.62    4.53   0  0.22789
  -4  -4 -17  113.50    5.95   0  0.16352
  -4  -4 -16 1577.81   11.36   0  0.15586
  -4  -4 -15   -3.14    8.41   0  0.14965
  -4  -4 -14  267.04    9.23   0  0.14014
  -4  -4 -13  103.84    8.66   0  0.13615
  -4  -4 -12 1214.99   11.21   0  0.13692
  -4  -4 -11   25.58    8.46   0  0.13775
  -4  -4 -10  632.13    7.83   0  0.13866
  -4  -3  -2  184.48    7.56   0  0.16309
  -4   6  13   78.07    4.16   0  0.22335
  -4   7  13   11.39    4.10   0  0.22295
  -4   9  13    2.33    6.86   0  0.21619
  -3  -3 -23   13.36    4.99   0  0.20422
  -3  -3 -22   36.76    7.19   0  0.19818
  -3  -3 -21  -11.03    7.13   0  0.19157
  -3  -3  -5  260.71    8.60   0  0.14563
  -3   1   8 2688.01   13.75   0  0.19673
  -3   5  12  203.51    6.04   0  0.21346
  -3   9  11    0.72    4.71   0  0.21261
  -2  -3 -20   37.41    5.23   0  0.17972
  -2  -3 -19   14.29    7.49   0  0.17212
  -2  -3 -18 1835.77   11.14   0  0.16636
  -2  -3 -17   15.55    7.89   0  0.15901
  -2  -3 -10  708.15   10.45   0  0.13191
  -2  -3  -9   -7.40    8.13   0  0.13491
  -2  -3  -8 2065.75   11.65   0  0.14040
  -2  -2 -25  122.05    7.29   0  0.21546
  -2  -2  -2 3272.37   18.65   0  0.15644
  -2   2   8 1366.95    9.80   0  0.19512
  -2   3   9  118.35    5.79   0  0.20445
  -2   4  10  430.06    6.77   0  0.20420
  -2   9  10   21.07    6.62   0  0.20554
  -2  10   9  147.01    5.53   0  0.20049
  -1  -2 -23   93.05    7.33   0  0.19857
  -1  -2 -22  609.61    8.42   0  0.19338
  -1  -2  -5  153.98    9.00   0  0.14122
  -1   5   9  256.31    6.39   0  0.19982
  -1   6   9   27.99    4.23   0  0.20198
  -1   7   9  266.24    5.04   0  0.20142
  -1   8   9   24.57    6.30   0  0.19987
  -1  10   8  294.50    8.26   0  0.18858
   0  -2 -19   -3.65    7.56   0  0.16555
   0  -2 -18  490.43    8.93   0  0.15668
   0  -2 -17  278.24    8.43   0  0.15101
   0  -2 -16  654.44    9.41   0  0.14400
   0  -2 -15   15.13    8.30   0  0.13532
   0  -2 -14 1040.32   11.32   0  0.12691
   0  -2 -13  693.27   10.71   0  0.12623
   0  -2 -12  147.16    8.98   0  0.12661
   0  -2 -11    7.01    8.64   0  0.12720
   0  -2 -10 2728.73   15.25   0  0.13044
   0  -1 -25    5.65    6.94   0  0.20962
   0  -1 -24  132.35    7.29   0  0.20369
   0   5   7  639.80    6.26   0  0.19101
   0   8   7   25.58    4.67   0  0.18879
   0   9   7   45.09    7.28   0  0.18280
   0  10   6  183.96    8.20   0  0.17936
   1  -1 -22  152.93    5.71   0  0.18372
   1  -1 -21  179.16    7.77   0  0.17695
   1  -1 -20 1025.30    9.86   0  0.17076
   1  -1  -8  820.96   11.94   0  0.12875
   1   0 -26  670.92    8.52   0  0.21995
   1   2   2 2778.14   17.49   0  0.16291
   1   5   5  255.66    6.85   0  0.17787
   1   8   5   63.79    5.05   0  0.17595
   1   9   5   78.29    7.89   0  0.16869
   1  10   4  171.05    8.63   0  0.16565
   2   0 -22 1362.35   10.46   0  0.18098
   2   0 -21   20.92    7.39   0  0.17388
   2   0  -8 3140.06   22.55   0  0.11975
   2   1 -26  339.94    7.51   0  0.22307
   2   3   1   23.53    6.77   0  0.15650
   2   4   2  373.22    7.80   0  0.16230
   2   5   3  567.22    8.48   0  0.16029
   2   6   3  245.61    7.60   0  0.16258
   2   7   3   31.63    7.01   0  0.16192
   2   8   3   59.20    7.66   0  0.15983
   2   9   2   80.05    8.29   0  0.15626
   2  10   1  115.86    9.22   0  0.15282
   3   1 -22  389.58    8.29   0  0.18397
   3   1 -21   92.20    7.60   0  0.17577
   3   2 -25   30.86    6.86   0  0.21747
   3   4  -1  230.19    8.44   0  0.14359
   3   5   0  337.99    8.53   0  0.14589
   3   8   0  230.58    8.98   0  0.14050
   3   9  -1   13.26    9.04   0  0.13776
   3  10  -2  575.25   11.58   0  0.13677
   4   2 -20   59.50    7.91   0  0.16557
   4   2 -19   11.71    8.02   0  0.15498
   4   2 -18 1098.98   14.04   0  0.14484
   4   2 -12  562.34   16.38   0  0.10414
   4   3 -24   57.04    7.10   0  0.21048
   4   3 -23   13.04    8.45   0  0.20249
   4   6  -3   24.79    9.14   0  0.12050
   4   7  -3   68.17    9.27   0  0.12468
   4   8  -3   11.71    9.68   0  0.12228
   4   9  -4   87.08   10.97   0  0.12136
   4  10  -6    6.47   11.58   0  0.12266
   5   4 -18  153.91   11.00   0  0.15418
   5   4 -17   18.73   12.57   0  0.13956
   5   4 -16 1000.75   19.79   0  0.13454
   5   4 -15  279.75   17.38   0  0.12185
   5   4 -14  844.57   25.27   0  0.10934
   5   5 -21   36.20   10.40   0  0.19141
   5   6  -8   15.22   14.27   0  0.09640
   5   7  -8  247.14   12.41   0  0.10276
   5   8  -8   20.92   14.03   0  0.10758
   5   9 -10  103.28   14.84   0  0.11633
 -12  -5  -6  292.55   12.54   0  0.15247
 -12  -5  -5   37.26    9.46   0  0.15648
 -12  -5  -4   13.84    8.80   0  0.16505
 -12   0  13    0.19    7.22   0  0.23554
 -11  -5  -6   12.73   10.92   0  0.15493
 -11  -5  -5  184.91    9.29   0  0.15697
 -11  -1  11   56.93   10.07   0  0.21726
 -11   3  16 1037.35    8.53   0  0.24641
 -10  -5  -6  331.90    9.70   0  0.15294
 -10  -5  -5    8.54    7.99   0  0.16247
 -10  -4   1  111.21    9.35   0  0.17891
 -10  -3   5    7.69    9.46   0  0.18898
 -10   1  14 1415.31   11.01   0  0.23247
 -10   2  15   20.31    5.77   0  0.23793
 -10   3  16  220.43    6.35   0  0.24170
  -9  -5  -7  119.64    8.85   0  0.14993
  -9  -5  -6  186.86    8.42   0  0.15928
  -9   0  12  566.98    9.15   0  0.22430
  -9   4  16  188.81    6.15   0  0.24170
  -8  -5 -16   64.98    8.84   0  0.16533
  -8  -5 -15   30.73    8.94   0  0.15831
  -8  -5 -10  315.43    9.54   0  0.14247
  -8  -5  -9    3.53    8.67   0  0.14469
  -8  -5  -8  259.36    9.00   0  0.15106
  -8  -5  -7   48.37    8.07   0  0.15602
  -8   2  14   10.71    5.30   0  0.23279
  -8   3  15   90.95    5.47   0  0.23971
  -7  -5 -18   92.04    6.32   0  0.17612
  -7  -5 -17  155.74    6.65   0  0.16888
  -7  -5 -16  862.51   11.06   0  0.16165
  -7  -5 -15    7.45    8.83   0  0.15518
  -7  -5 -14   -3.20    8.98   0  0.14776
  -7  -5 -13  154.33    9.40   0  0.14162
  -7  -5 -12  870.67   10.97   0  0.14269
  -7  -5 -11   36.65    8.55   0  0.14429
  -7  -5 -10  244.86    8.87   0  0.14685
  -7  -5  -9  263.95    6.70   0  0.14978
  -7   1  12 1051.10    8.77   0  0.22615
  -7   2  13    5.57    5.18   0  0.23220
  -7   3  14  471.81    6.41   0  0.23710
  -7   6  15   23.61    3.97   0  0.24071
  -7   7  15   33.51    4.19   0  0.24018
  -6  -4  -3  138.73    7.32   0  0.16529
  -6   1  11  445.65    6.96   0  0.22442
  -6   3  13  176.75    4.27   0  0.23337
  -6   4  14   32.23    5.39   0  0.23238
  -6   5  14 1002.45    6.27   0  0.23699
  -6   8  14   87.61    4.48   0  0.23524
  -5  -4 -21   -0.39    7.69   0  0.19433
  -5  -4  -5  396.95    8.27   0  0.16014
  -5   1  10   51.56    5.36   0  0.21999
  -5   4  13   13.91    5.36   0  0.23072
  -5   8  13    9.96    4.27   0  0.23051
  -4  -4 -21   72.14    5.59   0  0.19075
  -4  -4 -20  922.18    9.71   0  0.18312
  -4  -4 -19   11.91    7.79   0  0.17722
  -4  -4 -18   14.82    8.00   0  0.17048
  -4  -4  -9  237.66    8.42   0  0.14223
  -4  -4  -8  525.81    8.84   0  0.15001
  -4   1   9   31.39    5.58   0  0.20951
  -4   3  11   11.36    3.68   0  0.22329
  -4   4  12  513.27    6.40   0  0.22277
  -4   8  12  177.82    4.70   0  0.22555
  -4   9  12   57.15    6.74   0  0.21932
  -3  -4 -17    3.41    5.70   0  0.15768
  -3  -4 -16  526.71    7.29   0  0.15021
  -3  -4 -15  217.25    6.66   0  0.14226
  -3  -4 -14  382.22    7.51   0  0.13901
  -3  -4 -13   25.24    6.10   0  0.13960
  -3  -4 -12  833.87    8.50   0  0.14029
  -3  -3  -4 2963.74   14.88   0  0.15586
  -3   0   6 3002.41   19.58   0  0.19424
  -3   2   9  501.82    6.99   0  0.21107
  -3   3  10 2111.60    9.96   0  0.21642
  -3   4  11  669.66    6.98   0  0.21552
  -3   5  11   10.51    3.82   0  0.22135
  -3   6  11   33.97    4.00   0  0.22140
  -3   7  11  129.98    4.42   0  0.22093
  -2  -3 -23    7.09    5.03   0  0.19972
  -2  -3 -22 1167.83    9.55   0  0.19288
  -2  -3 -21   16.07    7.20   0  0.18696
  -2  -3  -7   10.65    7.50   0  0.14692
  -2   1   6 3703.64   16.43   0  0.19827
  -2   5  10 1355.42    8.34   0  0.21013
  -2   9   9   24.36    6.42   0  0.20781
  -2  10   8  149.12    5.56   0  0.20248
  -1  -3 -19   72.20    5.52   0  0.16582
  -1  -3 -18 1154.76    8.58   0  0.15789
  -1  -3 -17  -23.18    7.90   0  0.15131
  -1  -3 -16   98.84    8.42   0  0.14193
  -1  -3 -15    0.99    8.61   0  0.13471
  -1  -3 -14 2039.61   12.91   0  0.13541
  -1  -3 -13  -47.76    9.10   0  0.13440
  -1  -3 -12  198.64    6.65   0  0.13645
  -1  -2 -25   29.45    7.10   0  0.21162
  -1  -2 -24   10.93    6.98   0  0.20527
  -1   2   6 2708.63   13.47   0  0.19006
  -1   3   7   22.71    5.67   0  0.19815
  -1   4   8  966.55    8.00   0  0.19920
  -1   5   8  479.45    5.37   0  0.20553
  -1   8   8  371.89    6.92   0  0.20292
  -1   9   8  725.60    8.24   0  0.19586
  -1  10   7   -0.55    7.56   0  0.18976
   0  -2 -23    6.61    5.00   0  0.19277
   0  -2 -22    2.09    7.27   0  0.18549
   0  -2 -21  194.21    7.67   0  0.17959
   0  -2 -20  914.87    9.54   0  0.17244
   0  -2  -9 1039.65   11.54   0  0.13259
   0  -2  -8  280.61    7.03   0  0.14034
   0  -1 -26  313.86    7.88   0  0.21624
   0   2   4  633.73    9.28   0  0.18021
   0   3   5   23.26    4.22   0  0.18923
   0   4   6 1341.82    9.02   0  0.19356
   0   7   7   84.10    6.29   0  0.19083
   0   8   6  400.11    5.68   0  0.19109
   0   9   6   47.01    6.96   0  0.18415
   0  10   5  201.95    8.03   0  0.18027
   1  -1 -24  742.19    9.04   0  0.19647
   1  -1 -23   82.13    7.28   0  0.19130
   1  -1  -7   27.66    8.39   0  0.13965
   1   0  -3    7.04   11.91   0  0.14717
   1   3   3  368.19    7.62   0  0.17557
   1   4   4  461.47    7.40   0  0.17863
   1   6   5   29.57    6.16   0  0.17898
   1   7   5  420.16    7.61   0  0.17770
   1   8   4  319.60    5.75   0  0.17730
   1   9   4  954.34    9.71   0  0.16961
   1  10   3   -2.71    8.01   0  0.16909
   2  -1 -17   76.12    6.33   0  0.13492
   2  -1 -16 1700.08   11.84   0  0.12511
   2  -1 -15  328.50    7.78   0  0.12505
   2   0 -25    4.93    4.82   0  0.20687
   2   0 -24  328.29    7.77   0  0.19879
   2   0 -23    6.24    8.71   0  0.18891
   2   0  -7  139.52    9.86   0  0.12860
   2   2  -1 1478.49   17.73   0  0.15178
   2   5   2 1625.57   10.86   0  0.16700
   2   8   2  173.27    7.84   0  0.16121
   2   9   1   12.27    8.16   0  0.15749
   2  10   0  158.78    9.24   0  0.15425
   3   0 -17    7.02    6.35   0  0.12672
   3   0 -16  348.26    9.63   0  0.11928
   3   1 -24  486.82    8.37   0  0.20072
   3   1 -23   11.58    7.07   0  0.19219
   3   1  -8 2129.57   23.70   0  0.11994
   3   2 -26  182.30    8.94   0  0.22432
   3   6   0  405.06    8.78   0  0.14519
   3   7   0  205.05    8.56   0  0.14189
   3   8  -1  183.59    8.69   0  0.14277
   3   9  -2   77.71    9.24   0  0.13958
   3  10  -3   11.90   10.10   0  0.13660
   4   2 -22  596.65    9.33   0  0.18426
   4   2 -21  116.13    9.35   0  0.17513
   4   2 -11   35.99   14.66   0  0.10597
   4   3 -25    1.93    6.78   0  0.21740
   4   4  -5  902.64   16.49   0  0.11830
   4   5  -4   91.38   10.92   0  0.12303
   4   7  -4  157.32    9.54   0  0.12684
   4   8  -4  796.35   12.61   0  0.12226
   4   9  -5   16.51   12.72   0  0.12417
   5   4 -20  826.26   14.19   0  0.17117
   5   4 -19   29.07   11.25   0  0.16112
   5   4 -13    8.55   21.28   0  0.10502
   5   5 -22  187.27   11.06   0  0.19808
   5   5  -9  237.35   19.43   0  0.09659
   5   8  -9   90.87   14.16   0  0.11084
   5   9 -12   26.63   13.91   0  0.12210
   5   9 -11   -0.80   14.01   0  0.11972
 -14   0  13   -0.53    9.52   0  0.22339
 -13  -4   2   90.72    9.94   0  0.18657
 -13   0  13   42.60    9.14   0  0.23032
 -12  -5  -3   21.20    8.47   0  0.17130
 -12  -4   2  665.40   11.78   0  0.18666
 -12   1  14  580.15    8.00   0  0.24239
 -12   2  15   35.87    5.93   0  0.24940
 -12   3  16  290.51    6.94   0  0.24786
 -11  -5  -4  730.01   12.62   0  0.16554
 -11  -5  -3  199.37    8.61   0  0.17450
 -11  -4   2   29.60    8.72   0  0.18882
 -11   1  14  428.38    8.45   0  0.23919
 -10  -5  -4  329.82    9.13   0  0.16639
 -10  -5  -3   44.64    7.68   0  0.17648
  -9  -5  -5  184.97    8.27   0  0.16289
  -9  -5  -4  600.82    9.23   0  0.17283
  -9  -4   1  180.93    8.69   0  0.18492
  -9  -1  10  867.36   13.24   0  0.21935
  -9   1  13  169.51    6.03   0  0.23668
  -9   2  14 1613.14    9.36   0  0.24215
  -9   3  15   53.13    5.52   0  0.24258
  -8  -5  -6  250.29    8.30   0  0.15924
  -8  -5  -5    0.45    7.22   0  0.16590
  -8  -4   0  164.91    8.81   0  0.18108
  -8  -3   4 2007.72   17.73   0  0.19396
  -8   0  11    2.68    6.57   0  0.23171
  -8   4  15   20.75    5.48   0  0.24267
  -8   6  15    2.61    4.04   0  0.24748
  -7  -5  -8  782.06   10.04   0  0.15256
  -7  -5  -7   44.49    7.57   0  0.16170
  -7  -4  -1  261.30    9.06   0  0.17696
  -7  -3   3   10.39    9.00   0  0.18760
  -6  -5 -19   69.29    8.32   0  0.17930
  -6  -5 -18  249.08    8.88   0  0.17184
  -6  -5 -17   -3.74    8.41   0  0.16586
  -6  -5 -16   -0.01    8.61   0  0.15870
  -6  -5 -15   82.66    8.93   0  0.15218
  -6  -5 -14  393.50    9.88   0  0.14486
  -6  -5 -13   -3.15    8.92   0  0.14405
  -6  -5 -12  206.35    9.21   0  0.14280
  -6  -5 -11  115.13    8.91   0  0.14410
  -6  -5 -10  217.64    8.27   0  0.15191
  -6  -5  -9   10.88    5.44   0  0.15479
  -6  -4  -2 1162.08   10.27   0  0.17693
  -6  -3   2   77.84    8.05   0  0.18836
  -6  -2   5 1176.07   21.94   0  0.18375
  -6   2  12  924.71    7.66   0  0.23089
  -6   8  13   53.29    4.31   0  0.23802
  -5  -5 -16 1318.91    9.46   0  0.15484
  -5  -5 -15   37.42    6.08   0  0.14744
  -5  -5 -14   82.61    6.23   0  0.14450
  -5  -4  -4 2733.99   13.50   0  0.16475
  -5   2  11  791.70    7.49   0  0.22685
  -5   3  12 3095.44   11.20   0  0.22864
  -5   8  12  180.75    4.64   0  0.23326
  -4  -4 -22  155.79    7.85   0  0.19846
  -4  -4  -7  158.10    7.80   0  0.15330
  -4  -4  -6  937.36    9.54   0  0.16206
  -4  -3  -1   25.50    6.54   0  0.17416
  -4   2  10  327.54    6.36   0  0.21937
  -4   8  11    2.33    4.10   0  0.22800
  -4   9  11    9.66    6.49   0  0.22219
  -3  -4 -21    3.34    5.37   0  0.18641
  -3  -4 -20   62.07    7.86   0  0.17857
  -3  -4 -19  233.76    8.33   0  0.17326
  -3  -4 -18  802.38    9.64   0  0.16622
  -3  -4 -11  342.39    8.96   0  0.14105
  -3  -4 -10   76.84    7.97   0  0.14742
  -3  -4  -9  216.73    6.14   0  0.15084
  -3  -3  -3   36.52    6.57   0  0.16696
  -3   4  10 2385.12    8.97   0  0.22427
  -3   8  10  355.29    5.27   0  0.22171
  -3   9  10  386.23    7.13   0  0.21555
  -2  -3 -24  240.25    7.78   0  0.20730
  -2  -3  -6   20.61    7.25   0  0.15370
  -2   2   7  257.93    5.07   0  0.20988
  -2   3   8  108.08    5.63   0  0.21401
  -2   4   9  708.86    7.22   0  0.21227
  -2   5   9   97.54    4.09   0  0.21812
  -2   6   9  243.77    4.59   0  0.21746
  -2   7   9   88.47    4.21   0  0.21680
  -2   9   8   16.67    6.28   0  0.20987
  -2  10   7   52.53    5.14   0  0.20361
  -1  -3 -22  305.10    6.16   0  0.18719
  -1  -3 -21    9.22    7.44   0  0.18042
  -1  -3 -20  360.78    8.09   0  0.17417
  -1  -3 -11  -20.69    8.33   0  0.14011
  -1  -3 -10 2702.03   13.87   0  0.14183
  -1  -3  -9  167.41    6.56   0  0.14480
  -1  -2  -4  678.95   10.74   0  0.15647
  -1   1   4  576.26    8.49   0  0.19453
  -1   4   7  191.85    4.53   0  0.20761
  -1   8   7  405.21    5.35   0  0.20436
  -1   9   7    4.53    6.80   0  0.19777
  -1  10   6  512.45    8.38   0  0.19134
   0  -2 -25  116.52    5.43   0  0.20611
   0  -2 -24  910.46    8.93   0  0.20005
   0  -2  -7  163.57    6.16   0  0.14847
   0  -1  -3 2864.71   20.67   0  0.15646
   0   1   2 5750.52   27.43   0  0.18398
   0   5   6 1964.77    9.89   0  0.19676
   0   7   6  969.33    7.95   0  0.19689
   0   9   5    1.28    6.88   0  0.18430
   0  10   4  142.29    7.91   0  0.18098
   1  -2 -20 1037.14    8.25   0  0.16284
   1  -2 -19  143.17    6.13   0  0.15424
   1  -2 -18  102.20    8.47   0  0.14583
   1  -2 -17    8.32    8.59   0  0.13726
   1  -2 -16 2112.22   13.60   0  0.13158
   1  -2 -15  313.09    9.47   0  0.13199
   1  -2 -14   58.14    8.59   0  0.13212
   1  -2 -13  213.59    7.33   0  0.13269
   1  -1 -26   -0.32    7.02   0  0.21149
   1  -1 -25   85.70    7.27   0  0.20423
   1   5   4  340.33    7.27   0  0.18304
   1   6   4  398.74    7.04   0  0.18538
   1   7   4  107.11    6.67   0  0.18388
   1   9   3   -4.67    7.17   0  0.17398
   1  10   1   40.47    5.83   0  0.16983
   1  10   2  456.58    9.09   0  0.16856
   2  -1 -22  481.59    6.94   0  0.17393
   2  -1 -21   22.11    7.94   0  0.16540
   2  -1 -20 1148.79   10.74   0  0.15898
   2  -1 -19  185.13    8.36   0  0.15188
   2  -1 -18   23.68    8.21   0  0.14339
   2  -1 -14  420.16   10.29   0  0.12502
   2  -1 -13  263.53    9.69   0  0.12534
   2  -1 -12 2019.90   14.46   0  0.12752
   2   0 -26  317.36    7.69   0  0.21588
   2   3   0  721.47    9.95   0  0.16653
   2   4   1  499.14    8.09   0  0.16948
   2   6   2  705.48    8.61   0  0.16528
   2   7   2 1093.95    9.58   0  0.16389
   2   8   1    0.06    7.42   0  0.15995
   2   9   0  108.20    8.28   0  0.15900
   2  10  -1   84.86    9.16   0  0.15472
   3   0 -21    2.53    7.67   0  0.16164
   3   0 -20  343.20    9.23   0  0.15207
   3   0 -19    3.80    8.24   0  0.14363
   3   0 -18  290.75    9.51   0  0.13604
   3   0 -15    3.75    9.35   0  0.11910
   3   0 -14   78.00    9.45   0  0.11931
   3   0 -13    8.47    8.74   0  0.11988
   3   1 -26   -1.28    6.76   0  0.21723
   3   1 -25   71.38    7.06   0  0.20976
   3   3  -3  167.56    8.73   0  0.14560
   3   4  -2 3124.23   17.67   0  0.15041
   3   5  -1  529.68    9.13   0  0.14867
   3   6  -1   71.83    7.51   0  0.14956
   3   7  -1   90.85    8.09   0  0.14315
   3   8  -2  857.35   10.76   0  0.14331
   3   9  -3   51.19    9.19   0  0.14031
   3  10  -4    1.34    9.79   0  0.14153
   4   2 -24  267.69    7.97   0  0.20133
   4   2 -23   79.33    8.96   0  0.19296
   4   6  -4 1772.81   16.34   0  0.12583
   4   8  -5   82.98   12.38   0  0.12395
   4   9  -7    3.84   10.50   0  0.12435
   4   9  -6  123.32   13.04   0  0.12510
   5   4 -22    8.43    9.08   0  0.18658
   5   4 -21   23.42   10.57   0  0.17693
   5   6  -9   43.12   16.04   0  0.09990
   5   7  -9  205.98   16.29   0  0.10629
   5   8 -11  163.21   14.36   0  0.11631
   5   8 -10  468.09   15.93   0  0.11340
 -14  -1  11  147.58   13.65   0  0.22846
 -13  -1  11   61.85   10.61   0  0.22766
 -13   1  14  493.17    9.06   0  0.24515
 -12  -5  -2  148.74    8.63   0  0.17899
 -12  -1  11  242.07   11.32   0  0.22752
 -11  -5  -2  316.67    8.90   0  0.18055
 -11   3  15    1.42    5.52   0  0.25515
 -10  -5  -2  113.40    7.63   0  0.18575
 -10  -4   2 1487.64   13.09   0  0.19369
 -10   0  12 1738.08   12.72   0  0.23567
 -10   1  13    1.00    5.31   0  0.24772
 -10   2  14  127.81    5.75   0  0.24943
 -10   3  15    5.11    5.42   0  0.24882
  -9  -5  -3  266.93    7.86   0  0.17918
  -8  -5  -4  727.06    9.06   0  0.17583
  -8  -4   1  125.77    6.87   0  0.19315
  -8   1  12   28.29    5.36   0  0.23903
  -8   2  13  332.59    6.01   0  0.24341
  -8   3  14  529.39    6.44   0  0.24418
  -8   4  14    3.71    3.68   0  0.25039
  -8   7  14  669.63    5.75   0  0.24942
  -7  -5  -6 1185.09   10.27   0  0.16433
  -7  -5  -5   49.03    6.92   0  0.17336
  -7  -4   0 1523.56   11.14   0  0.18919
  -7   0  10  722.10    8.60   0  0.23074
  -7   3  13   -1.92    5.13   0  0.24316
  -7   8  13   23.40    4.27   0  0.24421
  -6  -5  -8  855.30    9.76   0  0.15708
  -6  -5  -7  464.49    8.71   0  0.16603
  -6   3  12    5.97    3.47   0  0.24164
  -6   4  13  261.95    5.85   0  0.23923
  -6   5  13   20.35    5.16   0  0.24179
  -5  -5 -20  493.95    9.37   0  0.18199
  -5  -5 -19   -6.32    8.11   0  0.17631
  -5  -5 -18   12.33    8.17   0  0.16920
  -5  -5 -17  184.67    8.53   0  0.16262
  -5  -5 -13  215.43    8.86   0  0.14452
  -5  -5 -12  955.89   10.53   0  0.14557
  -5  -5 -11  138.61    8.45   0  0.14877
  -5  -5 -10  549.42    8.97   0  0.15550
  -5  -4  -3  179.80    7.29   0  0.17258
  -5  -3   1   86.65    7.96   0  0.18610
  -5   4  12  899.28    7.19   0  0.23512
  -4  -5 -16  181.37    6.57   0  0.14914
  -4  -5 -15  151.78    6.48   0  0.14592
  -4  -4  -5  663.81    8.50   0  0.16842
  -4   0   7    7.47    6.69   0  0.21182
  -4   3  10  188.78    4.19   0  0.23154
  -4   4  11   91.30    5.24   0  0.22939
  -4   9  10  133.06    6.46   0  0.22518
  -3  -4 -23   63.56    7.44   0  0.20118
  -3  -4 -22  461.91    8.57   0  0.19416
  -3  -4  -8 2150.41   12.41   0  0.15483
  -3  -2   1 1117.21   13.88   0  0.18535
  -3   1   7    3.01    5.08   0  0.21667
  -3   3   9  144.60    5.51   0  0.22542
  -3   5  10  590.15    6.56   0  0.22553
  -3   6  10  106.60    5.55   0  0.22748
  -3   8   9  110.31    4.36   0  0.22311
  -3   9   9   14.81    6.32   0  0.21832
  -2  -4 -21   97.23    5.61   0  0.18085
  -2  -4 -20  884.65    9.60   0  0.17273
  -2  -4 -19   -6.20    7.97   0  0.16645
  -2  -4 -18   67.59    8.27   0  0.15880
  -2  -4 -17   33.64    8.19   0  0.15105
  -2  -4 -16 1078.97   10.68   0  0.14476
  -2  -4 -15   -1.73    8.22   0  0.14170
  -2  -4 -14  448.64    9.22   0  0.14182
  -2  -4 -13  454.73    9.22   0  0.14416
  -2  -4 -12  475.46    9.01   0  0.14508
  -2  -3  -5  105.58    7.16   0  0.16101
  -2  -2  -1   18.44    6.93   0  0.17594
  -2   0   4 8703.68   36.98   0  0.19882
  -2   4   8  524.15    5.42   0  0.21971
  -2   8   8  140.56    6.05   0  0.21587
  -2   9   7    4.27    4.33   0  0.21053
  -2  10   6   79.62    7.05   0  0.20369
  -1  -3 -25   -0.85    7.16   0  0.20849
  -1  -3 -24  437.76    8.22   0  0.20181
  -1  -3 -23   49.16    7.35   0  0.19536
  -1  -3  -8  933.36    9.97   0  0.15319
  -1   2   5  435.66    6.26   0  0.20395
  -1   3   6 1334.54    9.02   0  0.20778
  -1   5   7   71.87    5.54   0  0.21167
  -1   8   6  798.58    6.34   0  0.20509
  -1   9   6  229.70    7.23   0  0.19797
  -1  10   5    0.07    7.09   0  0.19423
   0  -3 -20   53.42    5.57   0  0.16476
   0  -3 -19   -0.21    7.83   0  0.15677
   0  -3 -18  854.17    9.84   0  0.14829
   0  -3 -17   47.45    8.38   0  0.13967
   0  -3 -16  388.26    9.35   0  0.13788
   0  -3 -15   19.31    8.20   0  0.13778
   0  -3 -14  486.90    9.40   0  0.13858
   0  -3 -13   17.75    5.80   0  0.13910
   0  -2  -6 1410.03   10.72   0  0.15624
   0   4   5  336.46    6.45   0  0.19872
   0   5   5  137.10    4.45   0  0.20039
   0   7   5   94.14    5.99   0  0.19829
   0   8   5   17.41    6.41   0  0.19173
   0   9   4   72.30    6.90   0  0.18688
   0  10   3   13.40    7.47   0  0.18163
   1  -2 -23  203.32    8.09   0  0.18403
   1  -2 -22  471.84    8.32   0  0.17767
   1  -2 -21   46.54    7.53   0  0.17092
   1  -2 -12 2767.92   15.55   0  0.13258
   1  -2 -11  651.18   10.37   0  0.13607
   1  -1  -6  632.71   11.01   0  0.14727
   1   2   1  586.86    9.97   0  0.18064
   1   3   2  737.82    7.74   0  0.18374
   1   4   3   36.74    5.91   0  0.18338
   1   7   3  124.59    6.55   0  0.18363
   1   8   3  281.24    7.37   0  0.17712
   1   9   2  142.80    7.53   0  0.17277
   1  10   0   18.53    5.76   0  0.16943
   2  -1 -24  447.60    8.73   0  0.18688
   2  -1 -23  140.78    7.94   0  0.18093
   2  -1 -11  233.07    9.39   0  0.12760
   2  -1 -10 2259.44   13.78   0  0.13330
   2   0  -6  566.92   11.80   0  0.14415
   2   5   1  439.69    7.76   0  0.17098
   2   6   1   14.70    6.20   0  0.17009
   2   7   1  121.17    6.98   0  0.16665
   2   8   0  337.23    8.11   0  0.16332
   2   9  -1   14.49    7.86   0  0.15869
   2  10  -2   10.17    9.10   0  0.15227
   3   0 -24    3.92    7.23   0  0.19018
   3   0 -23    0.80    7.30   0  0.18145
   3   0 -22  582.27    9.20   0  0.17094
   3   0 -12  620.81   12.14   0  0.12061
   3   0 -11    4.29    8.66   0  0.12268
   3   5  -2  155.15    7.40   0  0.15143
   3   7  -2  147.03    7.94   0  0.14704
   3   8  -3  221.07    8.94   0  0.14340
   3   9  -4 1134.27   12.32   0  0.14126
   3  10  -6  541.90   12.07   0  0.13838
   3  10  -5    3.47   12.21   0  0.13944
   4   1 -21   16.36    8.05   0  0.15892
   4   1 -20 1591.14   13.06   0  0.14814
   4   1 -19  151.37    9.38   0  0.13742
   4   1 -18  160.82   12.20   0  0.12527
   4   1 -17   29.68   12.62   0  0.11306
   4   1 -16 1786.35   18.06   0  0.11271
   4   1 -15  143.31   10.38   0  0.11271
   4   2 -25   49.07    6.97   0  0.21016
   4   2 -10  307.44   16.48   0  0.10829
   4   5  -5  388.42   12.28   0  0.12482
   4   6  -5   26.03    8.71   0  0.12645
   4   7  -5   29.29   11.14   0  0.12686
   4   8  -6   85.62   12.14   0  0.12526
   4   9  -8   -2.15   10.51   0  0.12617
   5   3 -20   46.11   10.06   0  0.15489
   5   3 -19   20.64   10.62   0  0.14193
   5   3 -18 1585.81   18.67   0  0.13067
   5   3 -17   41.50   12.34   0  0.11885
   5   4 -23   15.93    9.06   0  0.19550
   5   5 -10   46.90   17.41   0  0.09942
   5   6 -10  168.94   14.17   0  0.10549
   5   7 -10   31.44   15.12   0  0.10998
   5   8 -12  102.95   13.87   0  0.11955
 -14  -3   6  323.38   15.40   0  0.21207
 -13  -5  -1   81.29    8.34   0  0.18969
 -13  -4   3  172.04   11.03   0  0.20408
 -13  -3   6  340.05   14.49   0  0.20670
 -12  -5  -1   36.93    7.74   0  0.18980
 -12  -4   3   28.40    9.61   0  0.20542
 -12  -3   6  238.30   13.16   0  0.20717
 -11  -6  -7    3.64    8.49   0  0.17232
 -11  -5  -1   84.89    7.49   0  0.19124
 -11  -4   3  218.49    9.20   0  0.20577
 -11   0  12  673.59    9.43   0  0.24530
 -11   1  13  155.40    5.98   0  0.25270
 -11   2  14  939.29    8.14   0  0.25417
 -11   4  15  164.13    5.89   0  0.25956
 -10  -6  -9   12.85    8.85   0  0.16151
 -10  -6  -8  101.69    8.75   0  0.16898
  -9  -6 -12   55.29    9.44   0  0.15310
  -9  -6 -11   18.22    9.14   0  0.15508
  -9  -6 -10  691.18   10.60   0  0.15930
  -9  -6  -9   -4.41    8.55   0  0.16288
  -9  -5  -2  836.72    9.19   0  0.18848
  -9  -4   2   30.48    7.45   0  0.20167
  -9  -3   5    4.12    9.27   0  0.20625
  -9   2  13   29.48    5.07   0  0.25387
  -9   3  14   59.96    5.29   0  0.25183
  -8  -6 -14    7.23    9.41   0  0.15039
  -8  -6 -13   19.33    9.18   0  0.15090
  -8  -6 -12   59.55    9.02   0  0.15636
  -8  -6 -11    3.93    8.44   0  0.15522
  -8  -6 -10  176.41    6.47   0  0.16273
  -8  -5  -3  217.84    7.36   0  0.18251
  -8   3  13   69.71    3.73   0  0.25345
  -7  -6 -16  132.66    9.59   0  0.15562
  -7  -6 -15   27.27    9.30   0  0.15169
  -7  -6 -14  799.03    8.96   0  0.15272
  -7  -6 -13    7.23    6.23   0  0.15403
  -7  -5  -4  437.88    7.80   0  0.18306
  -7   1  11    9.65    4.90   0  0.24404
  -7   2  12  184.47    5.45   0  0.24508
  -7   4  13    9.37    4.96   0  0.24999
  -6  -5  -6   90.61    7.18   0  0.16984
  -6  -4  -1  339.73    8.79   0  0.18850
  -6   0   9  188.10    7.43   0  0.22446
  -6   2  11   55.16    4.99   0  0.23961
  -6   4  12  868.42    5.88   0  0.24785
  -5  -5  -9  265.17    8.09   0  0.15885
  -5  -5  -8  666.02    8.65   0  0.16524
  -5  -4  -2  587.11    7.99   0  0.18889
  -5  -2   4  583.41   15.04   0  0.19695
  -5   0   8  240.73    7.45   0  0.22463
  -5   2  10 2878.24   11.28   0  0.23906
  -5   3  11   64.44    5.23   0  0.23847
  -5   4  11  350.38    4.63   0  0.24316
  -5   7  11   29.61    3.86   0  0.24115
  -5   9  10  167.50    6.45   0  0.23439
  -4  -5 -21   17.98    8.14   0  0.18503
  -4  -5 -20    1.45    8.05   0  0.17959
  -4  -5 -19   84.81    8.35   0  0.17242
  -4  -5 -18  426.70    9.16   0  0.16476
  -4  -5 -17   12.39    8.29   0  0.15686
  -4  -5 -14  369.86    9.23   0  0.14702
  -4  -5 -13   36.80    8.15   0  0.14808
  -4  -5 -12  840.56    9.95   0  0.14985
  -4  -5 -11  384.70    8.34   0  0.15675
  -4  -5 -10  121.70    5.55   0  0.15985
  -4  -4  -4  127.20    6.68   0  0.17835
  -4  -3   0 1798.84   12.46   0  0.19337
  -4   1   8  276.63    6.15   0  0.22906
  -4   2   9  236.82    5.68   0  0.23333
  -4   4  10  135.22    3.87   0  0.23791
  -4   7  10  796.90    5.78   0  0.23580
  -4   9   9   20.82    6.08   0  0.22827
  -3  -4  -7  330.74    7.90   0  0.16209
  -3  -4  -6  365.41    7.57   0  0.17093
  -3  -3  -2 3200.66   15.77   0  0.17962
  -3   2   8  855.08    7.72   0  0.22252
  -3   4   9  316.31    5.94   0  0.23041
  -3   5   9  162.48    4.04   0  0.23160
  -3   6   9   22.30    3.70   0  0.23100
  -3   9   8 1096.60    8.11   0  0.21866
  -3  10   7    7.94    6.89   0  0.21214
  -2  -4 -23   17.71    7.35   0  0.19608
  -2  -4 -22   27.99    7.43   0  0.18826
  -2  -4 -11   32.61    7.66   0  0.14810
  -2  -4 -10  966.39    9.77   0  0.15308
  -2  -4  -9  503.00    6.79   0  0.15861
  -2  -3  -4 1603.78   11.06   0  0.17538
  -2   3   7   62.70    3.88   0  0.22206
  -2   5   8  682.19    6.66   0  0.22361
  -2   6   8 2515.25    9.73   0  0.22298
  -2   8   7   56.14    5.73   0  0.21789
  -2   9   6  276.79    5.05   0  0.21170
  -2  10   5  167.91    7.14   0  0.20513
  -1  -4 -19  150.95    6.19   0  0.15884
  -1  -4 -18  453.55    7.15   0  0.15060
  -1  -4 -17    9.92    6.10   0  0.14388
  -1  -4 -16  743.75    8.05   0  0.14421
  -1  -4 -15   48.75    6.57   0  0.14456
  -1  -3  -7  287.03    8.56   0  0.15927
  -1  -2  -3  627.00    9.93   0  0.17081
  -1  -1   0 1868.44   20.90   0  0.18618
  -1   4   6 2748.92   10.22   0  0.21497
  -1   9   5   24.05    6.85   0  0.19913
  -1  10   3    3.17    4.89   0  0.19529
  -1  10   4   32.15    7.10   0  0.19401
   0  -3 -24  142.94    5.67   0  0.19426
   0  -3 -23   11.98    7.53   0  0.18635
   0  -3 -22 1111.11    9.87   0  0.18085
   0  -3 -21   -0.82    7.81   0  0.17125
   0  -3 -12  824.69   10.12   0  0.14005
   0  -3 -11    1.88    7.61   0  0.14594
   0   2   3  185.87    7.12   0  0.19682
   0   3   4  392.89    6.97   0  0.19701
   0   8   4  402.49    7.11   0  0.19342
   0   9   3   18.79    6.60   0  0.18991
   0  10   2   20.70    7.43   0  0.18333
   1  -2 -26  399.39    8.32   0  0.20547
   1  -2 -25   45.65    7.32   0  0.19946
   1  -2 -24  164.79    7.73   0  0.19251
   1  -2 -10 1336.72   11.72   0  0.13979
   1  -2  -9   58.12    5.60   0  0.14745
   1   5   3  202.02    6.25   0  0.18749
   1   6   3   25.72    6.00   0  0.18721
   1   8   2  864.55    8.75   0  0.17799
   1   9   1   24.45    7.33   0  0.17402
   1  10  -1    5.19    8.18   0  0.16684
   2  -1 -26  337.10    8.03   0  0.20620
   2  -1 -25   31.91    7.40   0  0.19671
   2  -1  -9  435.23    7.60   0  0.14099
   2   4   0  712.58    8.74   0  0.17477
   2   7   0   52.43    6.78   0  0.16835
   2   8  -1   47.02    7.16   0  0.16444
   2   9  -2  180.00    8.20   0  0.16029
   2  10  -3   21.54    8.84   0  0.15403
   3   0 -26  519.15    8.75   0  0.20751
   3   0 -25   -4.21    7.03   0  0.19900
   3   0 -10  968.64   12.95   0  0.13046
   3   6  -2  245.09    8.06   0  0.14919
   3   7  -3  167.08    8.06   0  0.14867
   3   9  -5    8.33    9.02   0  0.14345
   3  10  -7   14.10   10.42   0  0.13852
   4   1 -24  659.76    9.50   0  0.19062
   4   1 -23   99.89    7.62   0  0.18112
   4   1 -22   53.99    9.56   0  0.16960
   4   1 -14 1055.77   16.03   0  0.11326
   4   1 -13   41.90   11.84   0  0.11362
   4   2 -26   28.76    8.65   0  0.21712
   4   4  -6   58.30   12.18   0  0.12621
   4   7  -6 1241.09   15.11   0  0.12741
   4   8  -7    6.43   11.35   0  0.12888
   4   9  -9   15.18   10.61   0  0.12702
   5   3 -23   18.33    7.50   0  0.18530
   5   3 -22  774.84   13.02   0  0.17586
   5   3 -21   -1.83    9.68   0  0.16365
   5   3 -16  551.10   17.60   0  0.11488
   5   3 -15   14.25   14.21   0  0.11001
   5   4 -24  424.97   10.92   0  0.20417
   5   7 -11   21.90   14.78   0  0.11301
   5   8 -13    7.61   14.87   0  0.12290
 -14   0  12  223.78    8.52   0  0.25341
 -14   1  13    1.36    5.86   0  0.26151
 -13  -5   0  476.95    9.68   0  0.20240
 -13   0  12  896.54   10.75   0  0.25356
 -13   1  13  148.63    6.19   0  0.25836
 -12  -5   0  228.32    8.09   0  0.20180
 -12   0  12  786.01    9.91   0  0.25065
 -12   1  13   33.48    6.78   0  0.25926
 -12   2  14  351.23    7.74   0  0.25871
 -11  -6  -6  838.66   10.91   0  0.17752
 -11  -3   6  633.59   15.06   0  0.21500
 -11   3  14   15.24    5.32   0  0.26289
 -10  -6  -7    4.86    7.73   0  0.17725
 -10  -6  -6   68.38    7.84   0  0.18232
 -10  -5  -1    7.71    8.23   0  0.19581
 -10  -4   3   55.41    7.77   0  0.21188
 -10  -1  10 1188.89   13.64   0  0.24082
 -10   4  14  185.27    5.65   0  0.26314
  -9  -6  -8   16.39    7.79   0  0.16941
  -9  -6  -7    7.41    7.71   0  0.17428
  -9  -5  -1  100.40    6.70   0  0.20073
  -9   0  11  138.20    6.87   0  0.24596
  -9   1  12  436.74    6.69   0  0.25128
  -8  -6  -9   -0.22    7.82   0  0.16876
  -8  -6  -8  175.41    8.18   0  0.17466
  -8  -5  -2   54.66    6.35   0  0.19701
  -8  -1   9   29.92    7.72   0  0.23228
  -8   2  12 1125.75    7.80   0  0.25506
  -8   4  13  320.52    5.75   0  0.25849
  -8   8  12  273.38    4.95   0  0.25300
  -7  -6 -12    0.81    8.49   0  0.15655
  -7  -6 -11   11.02    8.17   0  0.15942
  -7  -6 -10  939.17    9.97   0  0.16732
  -7  -6  -9   10.90    5.36   0  0.17083
  -7  -5  -3   90.33    6.37   0  0.19172
  -7  -4   1  159.35    6.45   0  0.20541
  -7   3  12 1963.49    8.94   0  0.25436
  -6  -6 -17    1.07    8.99   0  0.15958
  -6  -6 -16  126.26    9.63   0  0.15213
  -6  -6 -15   16.59    9.03   0  0.15156
  -6  -6 -14   91.04    8.97   0  0.15487
  -6  -6 -13   -1.62    8.16   0  0.15562
  -6  -6 -12  127.88    6.07   0  0.16085
  -6  -5  -5    8.56    6.56   0  0.17911
  -6  -5  -4  782.62    7.27   0  0.18820
  -6  -4   0   74.95    6.04   0  0.20449
  -6   1  10 3601.89   14.08   0  0.24010
  -5  -5  -7  133.56    7.16   0  0.17089
  -5  -5  -6 1779.33   10.60   0  0.17964
  -5   1   9  529.01    6.90   0  0.23689
  -5   5  11   39.87    4.96   0  0.24672
  -5   9   9   43.03    6.08   0  0.23572
  -4  -5  -9   16.18    6.97   0  0.16817
  -4  -5  -8 1052.40    8.12   0  0.17110
  -4  -4  -3  207.20    6.74   0  0.18922
  -4   5  10 1733.84    8.26   0  0.23844
  -4   9   8   10.69    5.95   0  0.22888
  -3  -5 -22   17.03    7.99   0  0.18752
  -3  -5 -21  129.34    8.46   0  0.17976
  -3  -5 -20  796.06    9.92   0  0.17423
  -3  -5 -19   13.80    8.17   0  0.16617
  -3  -5 -18    4.39    8.41   0  0.15719
  -3  -5 -17  194.61    8.93   0  0.15112
  -3  -5 -16  781.02   10.26   0  0.14798
  -3  -5 -15   33.03    8.33   0  0.14856
  -3  -5 -14  299.68    8.62   0  0.14952
  -3  -5 -13  177.23    8.21   0  0.15325
  -3  -5 -12  399.94    8.49   0  0.15673
  -3  -4  -5  154.57    6.63   0  0.17948
  -3   3   8 4564.61   13.18   0  0.23397
  -3   7   8  481.62    5.06   0  0.23150
  -3   9   7    8.54    6.00   0  0.22212
  -3  10   6  644.85    8.14   0  0.21265
  -2  -4  -8  114.25    6.90   0  0.16689
  -2   1   5  264.88    6.90   0  0.21896
  -2   2   6  165.80    5.71   0  0.22331
  -2   4   7   81.02    3.77   0  0.22760
  -2   6   7  116.71    4.05   0  0.22626
  -2   8   6   19.07    3.94   0  0.21888
  -2   9   5   20.44    4.47   0  0.21244
  -2  10   4  179.52    7.06   0  0.20650
  -1  -4 -24   14.48    5.44   0  0.19615
  -1  -4 -23   49.49    7.73   0  0.18794
  -1  -4 -22  502.70    8.51   0  0.18178
  -1  -4 -21   -3.65    7.72   0  0.17324
  -1  -4 -20  544.76    8.96   0  0.16681
  -1  -4 -14   18.34    8.01   0  0.14583
  -1  -4 -13   27.57    7.93   0  0.14690
  -1  -4 -12 1460.01   10.80   0  0.15145
  -1  -3  -6 2151.70   12.18   0  0.16979
  -1   0   2  820.80   17.42   0  0.20330
  -1   5   6  536.28    6.72   0  0.21472
  -1   8   5  155.83    6.22   0  0.20665
  -1   9   4 1262.79    8.92   0  0.20034
   0  -3 -25    7.99    7.29   0  0.20221
   0  -3 -10   94.39    7.55   0  0.14911
   0  -3  -9    6.14    4.88   0  0.15687
   0  -2  -5   12.47    6.92   0  0.16916
   0   4   4 1057.33    8.26   0  0.20695
   0   5   4  726.71    7.11   0  0.20730
   0   7   4  421.88    6.75   0  0.19944
   0   8   3    8.58    5.91   0  0.19708
   0   9   2  180.43    6.81   0  0.19162
   0  10   1   84.73    7.50   0  0.18314
   1  -3 -21    1.88    5.62   0  0.16281
   1  -3 -20  100.58    8.38   0  0.15409
   1  -3 -19    7.07    8.54   0  0.14554
   1  -3 -18 1600.61   12.02   0  0.13993
   1  -3 -17    3.51    8.23   0  0.14014
   1  -3 -16   25.92    5.70   0  0.14036
   1  -3 -15  153.50    6.42   0  0.14065
   1  -1  -5 1092.91   12.68   0  0.16110
   1   4   2 3128.55   13.13   0  0.19401
   1   5   2   16.34    5.49   0  0.19346
   1   6   2  102.93    6.03   0  0.19202
   1   7   2  267.07    6.89   0  0.18514
   1   8   1  208.23    7.22   0  0.18110
   1   9   0  987.32    9.60   0  0.17520
   1  10  -2  544.87    9.34   0  0.17186
   2  -2 -23   17.74    7.78   0  0.17384
   2  -2 -22  246.13    8.36   0  0.16658
   2  -2 -21  311.62    8.78   0  0.15905
   2  -2 -20  222.88    8.52   0  0.15182
   2  -2 -19   49.65    8.52   0  0.14260
   2  -2 -18  692.14   10.57   0  0.13328
   2  -2 -17  420.50    9.91   0  0.13320
   2  -2 -16   12.92    8.76   0  0.13328
   2  -2 -15  117.60    8.93   0  0.13462
   2  -2 -14  823.16   10.76   0  0.13525
   2   3  -1  209.85    7.34   0  0.17713
   2   5   0  271.88    7.08   0  0.17371
   2   6   0 2684.25   12.76   0  0.17088
   2   9  -3   45.37    7.80   0  0.16082
   2  10  -5  148.53    9.22   0  0.15682
   2  10  -4  165.20    9.16   0  0.15510
   3  -1 -23    4.62    8.02   0  0.16648
   3  -1 -22  367.32    9.16   0  0.16022
   3  -1 -21   84.02    8.43   0  0.15273
   3  -1 -20  222.74    8.99   0  0.14421
   3  -1 -19   -4.68    9.09   0  0.13153
   3  -1 -18  821.14   11.87   0  0.12718
   3  -1 -17  296.10    9.91   0  0.12695
   3  -1 -16   -0.17    8.70   0  0.12690
   3  -1 -15   -0.59    8.80   0  0.12758
   3  -1 -14 1069.10   10.88   0  0.12833
   3   1  -7   38.19   10.57   0  0.14591
   3   4  -3  619.58    9.86   0  0.15595
   3   6  -3    7.41    7.06   0  0.15310
   3   8  -4   52.01   10.16   0  0.14504
   3   9  -6   42.49    9.19   0  0.14414
   3  10  -8   75.15   10.78   0  0.13699
   4   0 -20   23.55    9.18   0  0.13182
   4   0 -19   -0.91    9.52   0  0.12085
   4   1 -26  259.07    7.89   0  0.20960
   4   1 -25   42.79    8.99   0  0.20034
   4   1 -12 1373.64   17.69   0  0.11572
   4   5  -6 1976.03   18.28   0  0.13090
   4   6  -6  101.33   10.53   0  0.13128
   4   7  -7   11.96    8.97   0  0.12935
   4   8  -8  326.09   12.83   0  0.12842
   4   9 -10  109.33   13.65   0  0.12756
   5   2 -20 1065.61   13.27   0  0.13719
   5   2 -19  194.53   10.50   0  0.12436
   5   3 -25    1.07    7.36   0  0.20192
   5   3 -24   11.55    8.97   0  0.19439
   5   3 -14 1189.88   22.98   0  0.10832
   5   6 -11   65.74   14.68   0  0.10904
   5   7 -12  157.47   13.62   0  0.11700
   5   8 -14   82.26   15.10   0  0.12568
 -13   3  14   20.58    5.76   0  0.26574
 -12   4  14  298.42    6.20   0  0.26866
 -11  -6  -5    9.68    9.66   0  0.18483
 -11  -6  -4   39.56    7.69   0  0.19470
 -11  -5   0  533.92   10.23   0  0.20407
 -11   2  13   10.40    5.17   0  0.26493
 -11   4  14  854.46    7.36   0  0.26488
 -11   5  14  204.28    5.96   0  0.26479
 -10  -6  -5   -1.27    7.22   0  0.18832
 -10  -5   0  725.22    9.30   0  0.20544
 -10   0  11    8.18    6.41   0  0.25024
 -10   1  12   88.17    5.42   0  0.25835
 -10   2  13  282.60    6.93   0  0.25882
  -9  -6  -6  968.16   10.15   0  0.18157
  -9  -6  -5   44.80    7.03   0  0.19092
  -9   3  13   76.88    5.19   0  0.25974
  -9   4  13   24.27    5.07   0  0.26416
  -8  -6  -7   27.80    7.33   0  0.17772
  -8  -6  -6  554.89    8.50   0  0.18699
  -8  -4   2 1419.73   12.02   0  0.21185
  -8   0  10  150.76    6.82   0  0.24627
  -8   1  11  731.87    7.39   0  0.25346
  -7  -6  -8  438.60    8.44   0  0.17441
  -7  -5  -2 1583.17   10.38   0  0.20125
  -7  -3   4 2927.67   19.70   0  0.21776
  -7   2  11  194.47    5.32   0  0.25593
  -7   4  12  112.31    5.08   0  0.25604
  -7   5  12  531.35    5.95   0  0.25636
  -6  -6 -11   27.69    7.84   0  0.16333
  -6  -6 -10  628.65    8.85   0  0.16780
  -6  -6  -9  100.64    7.27   0  0.17559
  -6  -3   3  222.61    8.89   0  0.21808
  -6   3  11   28.42    4.77   0  0.24990
  -6   4  11  137.85    5.26   0  0.25360
  -5  -6 -18  574.21    9.99   0  0.16444
  -5  -6 -17   -4.75    9.04   0  0.15407
  -5  -6 -16   21.49    8.88   0  0.15332
  -5  -6 -15   23.77    8.66   0  0.15367
  -5  -6 -14 1116.93   11.00   0  0.15499
  -5  -6 -13   23.82    8.09   0  0.16101
  -5  -6 -12  102.72    7.88   0  0.16412
  -5  -5  -5   74.55    6.49   0  0.18357
  -5  -4  -1  481.54    7.49   0  0.19858
  -5  -3   2  753.59   10.35   0  0.21137
  -5   3  10  661.82    6.49   0  0.24624
  -5   4  10 2372.50    8.49   0  0.24978
  -5   9   8  830.91    7.45   0  0.23655
  -4  -5  -7  489.33    7.76   0  0.17910
  -4  -2   3  397.16   11.32   0  0.21089
  -4   3   9   62.57    4.85   0  0.23970
  -4   4   9  493.66    4.89   0  0.24436
  -4   5   9   46.52    3.56   0  0.24391
  -4   9   7    7.29    5.86   0  0.22970
  -4  10   6   -2.94    6.44   0  0.22195
  -3  -5 -11   91.31    7.58   0  0.15891
  -3  -5 -10  680.64    8.51   0  0.16633
  -3  -3  -1  129.97    6.46   0  0.19508
  -3   2   7 1401.23    8.17   0  0.23498
  -3   4   8  381.39    5.91   0  0.23820
  -3   5   8  719.24    6.69   0  0.23758
  -3   6   8  193.57    5.51   0  0.23545
  -3   9   6   72.95    6.07   0  0.22238
  -3  10   5   -0.12    6.56   0  0.21479
  -2  -5 -22  377.68    8.83   0  0.18174
  -2  -5 -21    4.75    8.13   0  0.17390
  -2  -5 -20   83.57    8.52   0  0.16705
  -2  -5 -19   74.64    8.48   0  0.15996
  -2  -5 -18  362.87    9.29   0  0.15255
  -2  -5 -17    8.82    8.57   0  0.14911
  -2  -5 -16  704.04    9.75   0  0.15091
  -2  -5 -15  223.39    8.39   0  0.15259
  -2  -5 -14  281.37    8.42   0  0.15341
  -2  -4  -7   60.39    6.39   0  0.17243
  -2  -3  -3  162.81    6.49   0  0.18428
  -2  -2   0  556.65    9.32   0  0.20289
  -2   5   7  652.07    6.60   0  0.22648
  -2  10   3   26.11    6.67   0  0.20699
  -1  -4 -11    2.19    7.94   0  0.15383
  -1  -4 -10  115.84    7.39   0  0.16150
  -1  -3  -5   56.40    4.74   0  0.17870
  -1  -2  -2 2879.03   16.29   0  0.19205
  -1   3   5  269.98    6.03   0  0.21892
  -1   4   5   15.59    3.53   0  0.22115
  -1   8   4   79.63    6.13   0  0.20991
  -1   9   3   19.88    6.36   0  0.20228
  -1  10   1   -2.66    4.90   0  0.19668
  -1  10   2  586.62    8.31   0  0.19614
   0  -4 -22   47.61    5.73   0  0.17357
   0  -4 -21  123.72    8.28   0  0.16528
   0  -4 -20  720.99    9.60   0  0.15691
   0  -4 -19   40.50    8.37   0  0.14902
   0  -4 -18  348.18    9.03   0  0.14588
   0  -4 -17  155.02    8.47   0  0.14617
   0  -4 -16  565.38    9.16   0  0.14657
   0  -4 -15   32.66    5.74   0  0.14705
   0  -3  -8 1242.67    8.80   0  0.16435
   0  -1  -2 5575.03   27.78   0  0.18319
   0   3   3   28.60    5.35   0  0.20918
   0   7   3   78.90    5.82   0  0.20296
   0   8   2   40.39    5.91   0  0.19683
   0   9   1    8.11    6.45   0  0.19294
   0  10  -1   88.49    5.45   0  0.18402
   0  10   0  150.90    7.60   0  0.18403
   1  -3 -25   -3.96    7.43   0  0.19448
   1  -3 -24  403.90    8.40   0  0.18697
   1  -3 -23    2.90    7.53   0  0.17908
   1  -3 -22  936.17    9.67   0  0.17177
   1  -3 -14 2585.28   13.55   0  0.14067
   1  -3 -13   21.28    7.83   0  0.14380
   1  -2  -8 1305.32   12.08   0  0.15497
   1   3   1   11.39    5.59   0  0.19494
   1   7   1  444.44    7.19   0  0.18773
   1   8   0   19.06    6.45   0  0.18413
   1   9  -1   -1.27    7.26   0  0.17735
   1  10  -3   -0.18    8.13   0  0.17060
   2  -2 -26    0.86    7.51   0  0.19608
   2  -2 -25  111.32    7.81   0  0.19033
   2  -2 -24  550.89    8.86   0  0.18275
   2  -2 -13  831.43   10.63   0  0.13532
   2  -2 -12   49.65    7.73   0  0.14048
   2  -1  -8 1794.01   13.55   0  0.14899
   2   2  -2   90.17    8.80   0  0.17412
   2   6  -1  294.67    7.10   0  0.17458
   2   7  -1   28.08    8.16   0  0.16861
   2   8  -2   11.81    6.97   0  0.16524
   2   9  -4    2.67    7.78   0  0.16218
   2  10  -6   61.24    9.00   0  0.15754
   3  -1 -26   -3.75    7.44   0  0.19909
   3  -1 -25   81.43    7.65   0  0.18992
   3  -1 -24  475.20    8.93   0  0.17835
   3  -1 -13  670.55   10.83   0  0.12922
   3   0  -9   11.89    7.70   0  0.13877
   3   3  -4 6370.90   31.41   0  0.15875
   3   5  -3   75.86    8.35   0  0.15543
   3   7  -4  597.91    9.55   0  0.14892
   3   8  -5  157.22   10.46   0  0.14455
   3   9  -7   11.60    9.20   0  0.14322
   4   0 -24  137.32    7.97   0  0.17868
   4   0 -23    3.34    8.02   0  0.16476
   4   0 -22 1516.23   12.34   0  0.15666
   4   0 -21    3.42    8.91   0  0.13947
   4   0 -18 1359.70   15.44   0  0.11973
   4   0 -17    4.07    9.37   0  0.11961
   4   0 -16  766.24   12.11   0  0.11959
   4   6  -7  105.67    8.72   0  0.13390
   4   7  -8  131.22    9.42   0  0.13238
   4   8  -9   86.21   11.96   0  0.12988
   4   9 -12   49.95   11.17   0  0.12984
   4   9 -11   10.41   13.33   0  0.12861
   5   2 -23   69.50    7.97   0  0.17499
   5   2 -22    6.03    9.68   0  0.16343
   5   2 -21   67.59   10.62   0  0.14919
   5   2 -18  115.98   12.33   0  0.11976
   5   2 -17   95.91   12.31   0  0.11514
   5   5 -11   56.53   18.70   0  0.10310
   5   7 -13  160.06   15.52   0  0.12028
   5   8 -16   -0.97   14.61   0  0.13199
   5   8 -15    2.14   14.63   0  0.12872
 -13  -5   1   64.95    8.94   0  0.21747
 -13  -4   4  389.35   11.45   0  0.22771
 -13   2  13   13.26    5.49   0  0.26948
 -12  -5   1   45.62    8.30   0  0.21674
 -12  -4   4  234.84   10.14   0  0.22792
 -12   2  13   98.71    5.65   0  0.26856
 -11  -6  -3   16.44    7.18   0  0.20489
 -11  -5   1  248.13    7.62   0  0.21796
 -11  -1  10  930.92   12.16   0  0.25464
 -11   1  12  513.11    6.80   0  0.26579
 -11   3  13   -1.63    5.13   0  0.27047
 -11   5  13  219.36    4.44   0  0.27166
 -10  -6  -4   78.31    8.90   0  0.19659
 -10   4  13  251.56    5.71   0  0.26850
 -10   5  13   36.36    5.35   0  0.26861
 -10   7  12   34.61    4.06   0  0.26636
  -9  -7 -10    1.89    5.88   0  0.17867
  -9  -6  -4  433.71    8.00   0  0.20055
  -9  -5   0  170.70    8.08   0  0.21261
  -9  -4   3  133.09    7.62   0  0.22285
  -9   2  12   26.29    4.77   0  0.26361
  -9   6  12  183.91    4.21   0  0.26662
  -8  -7 -12   28.80    6.09   0  0.17174
  -8  -6  -5    5.98    6.50   0  0.19627
  -8  -5  -1    0.68    7.25   0  0.20890
  -8   3  12  151.62    5.09   0  0.26232
  -8   4  12  695.70    6.41   0  0.26485
  -8   5  12   18.49    4.92   0  0.26254
  -8   7  11  130.98    4.19   0  0.26147
  -7  -7 -14    9.08    6.19   0  0.16550
  -7  -6  -7   -2.22    6.74   0  0.18721
  -7  -6  -6 1059.65    9.18   0  0.19290
  -7  -1   8  690.31   11.96   0  0.24148
  -7   1  10  229.36    5.58   0  0.25701
  -7   3  11   34.97    4.70   0  0.26284
  -6  -6  -8   65.18    7.04   0  0.18002
  -6  -6  -7   83.20    5.03   0  0.18872
  -6  -5  -3  471.51    7.72   0  0.19900
  -6   2  10   20.51    4.68   0  0.25415
  -6   8   9  132.09    4.17   0  0.25008
  -6   9   8   63.96    4.33   0  0.24440
  -5  -6 -11    3.30    7.39   0  0.16851
  -5  -6 -10  841.62    8.81   0  0.17466
  -5  -6  -9   26.84    4.74   0  0.18028
  -5  -5  -4  158.24    6.16   0  0.19848
  -5   2   9   84.67    5.04   0  0.25174
  -5   8   8   31.04    3.87   0  0.24468
  -5   9   7   59.56    4.32   0  0.23873
  -4  -6 -19   10.94    8.57   0  0.16546
  -4  -6 -18   64.44    8.75   0  0.15749
  -4  -6 -17    2.64    8.58   0  0.15672
  -4  -6 -16  188.57    8.99   0  0.15632
  -4  -6 -15   40.77    8.10   0  0.15705
  -4  -6 -14  596.76    9.18   0  0.15937
  -4  -6 -13   -4.96    7.70   0  0.16367
  -4  -6 -12  103.28    5.41   0  0.16908
  -4  -5  -6  148.39    6.64   0  0.18540
  -4  -4  -2  855.79    8.50   0  0.20094
  -4  -3   1   28.69    5.37   0  0.21651
  -4  -1   5  415.46   14.55   0  0.21966
  -4   2   8 1154.95    7.91   0  0.24462
  -4   8   7    7.99    3.81   0  0.23857
  -4   9   6  145.32    4.43   0  0.23235
  -4  10   5   77.23    6.48   0  0.22424
  -3  -6 -20   53.65    6.31   0  0.16759
  -3  -6 -19    9.91    6.19   0  0.15910
  -3  -6 -18  754.10    8.33   0  0.15652
  -3  -5  -9  258.75    7.09   0  0.17197
  -3  -5  -8  161.54    6.68   0  0.17979
  -3  -4  -4 1794.33   11.10   0  0.18972
  -3   0   5    4.41    5.23   0  0.22939
  -3   1   6  228.65    6.02   0  0.23779
  -3   6   7   31.15    3.60   0  0.23980
  -3   9   5   -1.80    5.85   0  0.22473
  -3  10   4    7.01    6.55   0  0.21786
  -2  -5 -13   16.73    7.52   0  0.15829
  -2  -5 -12 1427.73   10.31   0  0.16071
  -2  -5 -11  620.92    8.42   0  0.16758
  -2  -4  -6 1037.53    8.86   0  0.18013
  -2   3   6  184.73    5.40   0  0.23296
  -2   4   6  231.04    4.26   0  0.23515
  -2   5   6 2789.78    9.37   0  0.23436
  -2   6   6  575.51    6.26   0  0.23228
  -2   8   5   82.44    5.69   0  0.22049
  -2   9   4   11.39    6.09   0  0.21471
  -2  10   2   13.87    6.55   0  0.20917
  -1  -5 -23   17.26    5.65   0  0.18298
  -1  -5 -22    3.99    5.64   0  0.17470
  -1  -5 -21   80.50    5.99   0  0.16715
  -1  -5 -20  731.66    8.00   0  0.15906
  -1  -5 -19    2.27    5.94   0  0.15233
  -1  -5 -18  212.77    6.48   0  0.15262
  -1  -5 -17  113.15    6.28   0  0.15313
  -1  -5 -16  544.45    7.12   0  0.15370
  -1  -4  -9   88.40    7.21   0  0.16617
  -1  -4  -8 2321.15   10.51   0  0.17468
  -1   1   3 1021.51   10.38   0  0.22018
  -1   2   4  413.53    7.17   0  0.21914
  -1   5   5   84.69    5.29   0  0.22290
  -1   8   3  290.59    6.75   0  0.21193
  -1   9   2    2.45    6.13   0  0.20625
  -1  10   0   25.35    4.95   0  0.19804
   0  -4 -24  460.01    8.72   0  0.19003
   0  -4 -23    3.28    7.92   0  0.18044
   0  -4 -14  983.73    9.93   0  0.14885
   0  -4 -13  834.93    9.32   0  0.15340
   0  -4 -12   16.96    5.10   0  0.15794
   0  -3  -7   12.25    4.40   0  0.17440
   0  -2  -4  589.59    8.85   0  0.18753
   0   4   3   76.04    5.29   0  0.21545
   0   5   3  508.41    6.47   0  0.21443
   0   7   2 1703.23    9.24   0  0.20606
   0   8   1   17.29    4.21   0  0.19899
   0   9   0   -6.55    6.45   0  0.19239
   0  10  -2   17.72    5.23   0  0.18619
   1  -3 -12 1519.70   11.11   0  0.14872
   1  -3 -11  212.94    8.10   0  0.15721
   1  -2  -7  468.20    8.65   0  0.16762
   1   4   1  377.21    6.65   0  0.19961
   1   5   1   39.48    5.39   0  0.20056
   1   6   1   13.37    5.82   0  0.19429
   1   7   0  249.34    6.54   0  0.19078
   1   8  -1  233.86    6.98   0  0.18628
   1   9  -2    7.67    7.19   0  0.17757
   1  10  -4   37.45    8.04   0  0.17382
   2  -3 -23   63.49    5.94   0  0.16856
   2  -3 -22  519.52    7.54   0  0.15951
   2  -3 -21    5.72    5.89   0  0.15009
   2  -3 -20  212.34    6.82   0  0.14110
   2  -3 -19  129.22    6.32   0  0.14093
   2  -3 -18  350.12    7.10   0  0.14112
   2  -3 -17   92.24    6.16   0  0.14127
   2  -2 -11  245.62    8.19   0  0.14575
   2   0  -5  225.75    8.90   0  0.16807
   2   4  -1  610.56    8.40   0  0.18125
   2   5  -1  548.57    7.83   0  0.17955
   2   7  -2 1320.49   10.03   0  0.17168
   2   8  -3   28.52    6.96   0  0.16675
   2   9  -5   26.17    7.80   0  0.16414
   2  10  -7   50.75    9.02   0  0.15813
   3  -2 -23  147.52    6.40   0  0.16092
   3  -2 -22   92.48    8.94   0  0.15149
   3  -2 -21    5.69    8.90   0  0.14174
   3  -2 -20 1660.13   13.15   0  0.13467
   3  -2 -19  155.26    9.41   0  0.13450
   3  -2 -18   20.32    6.16   0  0.13438
   3  -2 -17   23.88    6.12   0  0.13454
   3  -1 -12  354.16    9.32   0  0.13637
   3   6  -4   83.35    7.33   0  0.15474
   3   7  -5  188.19    8.05   0  0.15437
   3   8  -6 1019.40   11.60   0  0.14705
   3   9  -8  879.08   12.04   0  0.14434
   4   0 -26  473.10    8.84   0  0.19930
   4   0 -25  -11.99    9.11   0  0.18772
   4   0 -15   -1.85   11.05   0  0.12114
   4   0 -14 1885.14   15.37   0  0.12206
   4   1 -11  150.04   11.54   0  0.12432
   4   2  -9  199.05   16.03   0  0.12787
   4   4  -7  169.04   11.89   0  0.13813
   4   5  -7  271.70   11.03   0  0.13786
   4   8 -10   68.87   11.92   0  0.13184
   4   9 -13    7.66   13.37   0  0.13036
   5   1 -22  356.33   10.22   0  0.14646
   5   1 -21  134.13    9.87   0  0.13150
   5   1 -20   19.47    9.83   0  0.12446
   5   1 -19  119.38   10.38   0  0.12037
   5   2 -25   18.98    9.37   0  0.19326
   5   2 -24  547.09   11.00   0  0.18442
   5   2 -16  964.30   18.19   0  0.11321
   5   2 -15  485.89   15.22   0  0.11096
   5   6 -12   31.48   14.18   0  0.11579
 -14   1  12  260.09    7.84   0  0.27055
 -13   1  12   48.92    6.71   0  0.27047
 -13   3  13    4.35    5.50   0  0.27391
 -12  -6  -2   75.55    7.45   0  0.21129
 -12   1  12  249.29    7.15   0  0.26912
 -12   3  13   78.56    5.46   0  0.27567
 -12   4  13   78.47    5.47   0  0.27336
 -11  -6  -2  912.86   10.24   0  0.21304
 -11  -4   4  654.75   12.10   0  0.22973
 -11   0  11    2.79    6.07   0  0.26401
 -10  -6  -3   26.72    8.29   0  0.20399
 -10  -5   1  165.74    8.19   0  0.22044
 -10  -3   6   55.25   10.73   0  0.22620
 -10   2  12  642.27    6.74   0  0.26917
  -9  -7  -9   34.72    8.02   0  0.18495
  -9  -6  -3   27.52    6.56   0  0.20840
  -9   1  11   23.65    5.99   0  0.26439
  -9   3  12 1769.65    8.51   0  0.26770
  -9   4  12   29.38    4.99   0  0.26951
  -9   5  12  392.20    5.81   0  0.26772
  -9   8  10  523.53    5.34   0  0.26133
  -8  -7 -11   78.46    8.38   0  0.17383
  -8  -7 -10  171.75    8.33   0  0.18258
  -8  -6  -4    4.20    6.45   0  0.19976
  -8  -5   0 1557.23   10.59   0  0.21758
  -8  -3   5   46.52    8.60   0  0.23194
  -8   2  11   61.79    4.76   0  0.26438
  -7  -7 -13   13.29    8.41   0  0.16862
  -7  -7 -12  438.57    9.15   0  0.17484
  -7  -7 -11    5.19    5.35   0  0.17848
  -7  -6  -5   63.02    6.35   0  0.19634
  -7  -5  -1   60.84    5.94   0  0.21183
  -7  -4   2  860.75   10.05   0  0.22316
  -7   0   9    2.84    5.79   0  0.25465
  -7   4  11   63.99    4.88   0  0.26223
  -7   8   9   83.49    4.05   0  0.25502
  -6  -7 -15   65.63    8.79   0  0.16561
  -6  -7 -14  220.86    6.70   0  0.16855
  -6  -7 -13   37.60    5.80   0  0.17154
  -6  -6  -6 1315.02    9.44   0  0.19623
  -6  -5  -2  295.78    6.65   0  0.20765
  -6  -4   1  182.93    7.31   0  0.22106
  -6  -1   7  447.57   10.33   0  0.24169
  -6   1   9   72.38    4.86   0  0.25443
  -6   3  10  684.14    6.31   0  0.25870
  -6   4  10   16.30    4.78   0  0.26016
  -6   5  10 1767.56    7.90   0  0.25955
  -6   7   9    6.14    3.57   0  0.25537
  -6   8   8  444.73    4.92   0  0.25027
  -6   9   7   20.31    4.22   0  0.24449
  -5  -6  -8  770.01    8.25   0  0.18650
  -5  -5  -3  292.08    6.50   0  0.20703
  -5  -4   0 1387.40    9.89   0  0.21589
  -5   1   8 1890.32   10.29   0  0.25175
  -5   3   9  142.89    5.08   0  0.25661
  -5   4   9   14.00    3.28   0  0.25660
  -5   7   8  394.81    4.65   0  0.25005
  -5   9   6   29.59    4.20   0  0.23849
  -5  10   5   11.48    4.50   0  0.23082
  -4  -6 -11   14.71    7.11   0  0.17077
  -4  -6 -10 1083.74    9.28   0  0.17884
  -4  -5  -5   39.45    6.02   0  0.19512
  -4   1   7  223.97    5.73   0  0.24454
  -4   3   8  256.18    5.29   0  0.25127
  -4   4   8  644.54    5.22   0  0.25117
  -4   5   8  167.92    5.06   0  0.25009
  -4   7   7    6.14    3.66   0  0.24436
  -4   9   5   18.33    4.08   0  0.23192
  -4  10   4  179.84    6.85   0  0.22408
  -3  -6 -17   -5.34    8.45   0  0.15777
  -3  -6 -16   44.51    8.24   0  0.15720
  -3  -6 -15    3.38    7.84   0  0.16122
  -3  -6 -14  816.60    9.33   0  0.16422
  -3  -6 -13   65.62    5.29   0  0.16726
  -3  -5  -7  134.40    6.46   0  0.18399
  -3  -4  -3   23.44    5.55   0  0.20268
  -3   3   7   47.45    4.81   0  0.24278
  -3   4   7  544.23    6.07   0  0.24488
  -3   5   7   89.57    5.04   0  0.24301
  -3   8   5  172.43    4.35   0  0.23131
  -3   9   4 1321.21    8.16   0  0.22389
  -3  10   3    4.52    6.62   0  0.21550
  -2  -5 -10   50.09    6.80   0  0.17029
  -2  -5  -9  171.81    5.07   0  0.17795
  -2  -4  -5  234.38    6.40   0  0.19182
  -2  -3  -2  514.74    7.55   0  0.20046
  -2   2   5  499.34    5.87   0  0.23608
  -2   6   5  201.24    4.18   0  0.23303
  -2   8   4  518.44    6.47   0  0.22133
  -2   9   3   46.07    6.28   0  0.21323
  -2  10   1   95.56    6.82   0  0.20869
  -1  -5 -15   -0.20    7.82   0  0.15474
  -1  -5 -14  505.71    8.70   0  0.15632
  -1  -5 -13   -0.22    5.45   0  0.16148
  -1  -4  -7  103.05    4.78   0  0.18099
  -1  -3  -4 2774.48   12.96   0  0.19247
  -1   3   4 4006.55   13.11   0  0.22839
  -1   5   4 1220.43    6.97   0  0.22666
  -1   6   4  111.55    5.45   0  0.22110
  -1   7   3  187.82    4.31   0  0.21842
  -1   8   2 1020.58    6.76   0  0.21103
  -1   9   1    6.01    6.12   0  0.20668
  -1  10  -1    4.85    5.04   0  0.19739
   0  -4 -11    2.74    6.94   0  0.16238
   0   2   2   10.81    5.97   0  0.21078
   0   9  -1   13.07    6.45   0  0.19410
   0  10  -3   12.64    7.38   0  0.18674
   1  -4 -24  240.70    6.44   0  0.17977
   1  -4 -23   39.78    8.11   0  0.17198
   1  -4 -22  553.08    9.41   0  0.16491
   1  -4 -21   19.31    8.57   0  0.15617
   1  -4 -20  824.47   10.43   0  0.14872
   1  -4 -19  148.46    8.62   0  0.14624
   1  -4 -18  129.26    8.41   0  0.14658
   1  -4 -17   44.67    8.18   0  0.14764
   1  -4 -16 1586.68    9.61   0  0.14820
   1  -3 -10 2734.77   13.38   0  0.15915
   1  -1  -4  521.62    9.91   0  0.18197
   1   2   0  397.34    8.62   0  0.19711
   1   6   0  175.07    6.07   0  0.19707
   1   8  -2  892.52    7.35   0  0.18582
   1   9  -3   15.92    7.21   0  0.17781
   1  10  -5    3.27    8.17   0  0.17092
   2  -3 -25    8.93    7.89   0  0.18303
   2  -3 -24    6.08    7.92   0  0.17635
   2  -3 -16  266.77    8.81   0  0.14077
   2  -3 -15   61.38    7.93   0  0.14244
   2  -3 -14  265.05    6.43   0  0.14415
   2  -2 -10  608.90    9.08   0  0.15197
   2  -1  -7  314.54    8.38   0  0.16334
   2   6  -2   35.73    6.01   0  0.17786
   2   7  -3  116.01    6.82   0  0.17517
   2   8  -4  431.85    8.27   0  0.16824
   2   9  -6  226.07    8.43   0  0.16477
   2  10  -8   97.04    9.53   0  0.15632
   3  -2 -26  207.29    8.63   0  0.18593
   3  -2 -25   34.46    8.11   0  0.17837
   3  -2 -24  451.63    9.42   0  0.17095
   3  -2 -16 2006.22   13.39   0  0.13403
   3  -2 -15  630.43   10.18   0  0.13535
   3  -1 -11   88.60    7.81   0  0.14291
   3   0  -8  385.32    9.37   0  0.15509
   3   4  -4  166.64    8.75   0  0.16067
   3   5  -4 1073.65   12.05   0  0.15936
   3   6  -5   49.03    6.96   0  0.15924
   3   7  -6   16.11    7.36   0  0.15448
   3   8  -7  194.89    8.93   0  0.14905
   3   9  -9   12.87    9.12   0  0.14491
   4  -1 -25   43.40    5.76   0  0.17655
   4  -1 -24  688.65   10.13   0  0.16534
   4  -1 -23   98.61    8.64   0  0.15408
   4  -1 -22   59.43    9.19   0  0.14238
   4  -1 -21   24.11    9.33   0  0.13196
   4  -1 -20 1380.23   13.20   0  0.12622
   4  -1 -19  143.99    9.77   0  0.12600
   4  -1 -18  172.34    9.68   0  0.12598
   4  -1 -17   30.39    8.98   0  0.12604
   4   0 -13    2.44    8.61   0  0.12386
   4   6  -8 1931.18   17.12   0  0.13640
   4   7  -9   18.96   10.81   0  0.13413
   4   8 -11    0.58   11.91   0  0.13261
   5   1 -25  133.36    8.14   0  0.18519
   5   1 -24  108.92    8.33   0  0.17446
   5   1 -23   51.11   10.29   0  0.15956
   5   1 -18  580.24   14.28   0  0.11798
   5   1 -17  906.93   13.75   0  0.11522
   5   7 -14   90.55   16.58   0  0.12392
   6   5 -21   -0.16    6.67   0  0.14198
 -14  -1  10   27.87    9.18   0  0.26519
 -14   0  11    0.84    6.64   0  0.27569
 -14   2  12   28.27    5.54   0  0.28011
 -13  -5   2  269.52    9.65   0  0.23501
 -13  -1  10 1051.93   13.20   0  0.26452
 -13   0  11    6.57    6.57   0  0.26987
 -13   2  12  404.34    6.43   0  0.27926
 -12  -6  -1   15.01    6.89   0  0.21902
 -12  -5   2   69.60    8.02   0  0.23405
 -12  -1  10  341.41   10.15   0  0.26212
 -12   0  11    8.85    7.04   0  0.27332
 -12   2  12  168.58    5.65   0  0.27720
 -11  -5   2  664.51    8.93   0  0.23660
 -11   2  12  239.67    6.71   0  0.27492
 -11   3  12 1346.26    7.93   0  0.27851
 -11   5  12  193.78    5.66   0  0.27640
 -10  -7  -6  100.13    7.48   0  0.20400
 -10  -6  -2  407.51    8.20   0  0.21528
 -10  -4   4  107.79    8.43   0  0.23451
 -10   1  11  410.74    6.19   0  0.27244
 -10   3  12  571.24    6.24   0  0.27487
 -10   4  12  450.27    5.97   0  0.27416
  -9  -7  -8  600.35    9.40   0  0.19142
  -9  -7  -7    1.50    7.17   0  0.19749
  -9  -6  -2  567.21    8.13   0  0.22031
  -9  -5   1  268.53    8.11   0  0.22735
  -9  -1   9  654.73   10.48   0  0.25840
  -9   0  10  144.78    6.45   0  0.26504
  -9   2  11   40.19    4.59   0  0.27457
  -9   5  11   11.96    3.51   0  0.27356
  -9   6  11   58.45    5.07   0  0.27100
  -9   7  10  248.43    4.37   0  0.26816
  -8  -7  -9   98.81    7.73   0  0.18760
  -8  -7  -8  139.35    7.50   0  0.19529
  -8  -6  -3   63.71    6.27   0  0.21089
  -8  -4   3  297.84    8.06   0  0.23492
  -8   1  10 2611.09   11.09   0  0.26890
  -8   3  11   86.45    4.82   0  0.27235
  -8   4  11   63.68    4.83   0  0.26992
  -7  -7 -10   55.44    7.38   0  0.18323
  -7  -7  -9   49.57    7.34   0  0.19187
  -7  -6  -4 1011.20    8.74   0  0.20610
  -7   2  10 2461.03    9.97   0  0.26647
  -7   7   9  214.76    4.09   0  0.26214
  -7   8   8   34.10    3.81   0  0.25699
  -7   9   7   64.02    4.29   0  0.25074
  -6  -7 -12  116.98    8.04   0  0.17570
  -6  -7 -11   68.70    7.57   0  0.18389
  -6  -7 -10   77.47    5.18   0  0.18728
  -6  -6  -5  123.65    6.32   0  0.20683
  -6   0   8 4878.21   18.49   0  0.25535
  -6   9   6   80.47    4.20   0  0.24555
  -5  -7 -16  408.14    9.74   0  0.16334
  -5  -7 -15    8.76    8.44   0  0.16550
  -5  -7 -14    4.82    7.89   0  0.17281
  -5  -7 -13   52.14    7.71   0  0.17595
  -5  -6  -7   10.38    6.25   0  0.19210
  -5  -6  -6  611.60    6.15   0  0.20112
  -5  -1   6  120.02    8.71   0  0.23971
  -5   0   7   25.30    5.63   0  0.25504
  -5  10   4   26.21    4.43   0  0.23191
  -4  -7 -17   28.20    6.28   0  0.16435
  -4  -7 -16  109.11    6.20   0  0.16558
  -4  -6  -9   23.87    6.53   0  0.18415
  -4  -6  -8  171.26    4.95   0  0.19221
  -4  -5  -4 1191.44    8.66   0  0.20670
  -4  -4  -1  488.59    6.99   0  0.21583
  -4   0   6   92.59    6.46   0  0.24307
  -4   9   4   99.54    4.27   0  0.23271
  -4  10   3   95.65    6.61   0  0.22535
  -3  -6 -12  334.85    7.66   0  0.17155
  -3  -6 -11   13.51    6.53   0  0.17943
  -3  -6 -10  353.45    5.67   0  0.18269
  -3  -5  -6 1306.82    9.23   0  0.19272
  -3  -3   0 5936.95   19.95   0  0.21768
  -3   2   6 3275.30   11.84   0  0.24908
  -3   6   6  634.38    6.25   0  0.24470
  -3   7   5  238.81    4.21   0  0.23953
  -3   8   4   17.94    3.74   0  0.23288
  -3   9   3   63.72    6.11   0  0.22533
  -3  10   2  613.31    7.69   0  0.21735
  -2  -6 -20  224.36    9.25   0  0.16205
  -2  -6 -19   59.63    8.82   0  0.15752
  -2  -6 -18  376.99    9.41   0  0.15789
  -2  -6 -17   86.26    8.36   0  0.15888
  -2  -6 -16  100.07    8.23   0  0.16071
  -2  -6 -15   47.58    7.80   0  0.16414
  -2  -6 -14 1204.79    8.39   0  0.16736
  -2  -5  -8 1250.76    8.81   0  0.18748
  -2  -4  -4  681.38    6.38   0  0.20397
  -2   3   5  206.28    4.27   0  0.24212
  -2   5   5  398.12    5.83   0  0.24005
  -2   8   3   13.44    5.37   0  0.22479
  -2   9   2  202.20    6.37   0  0.21527
  -2  10   0  157.92    6.80   0  0.20986
  -1  -5 -12   78.35    7.27   0  0.16614
  -1  -5 -11   40.45    6.64   0  0.17382
  -1   4   4   65.40    5.03   0  0.22922
  -1   6   3    5.21    3.44   0  0.22662
  -1   9   0 1031.88    8.30   0  0.20775
  -1  10  -2  487.67    7.86   0  0.19916
   0  -5 -23  130.28    8.70   0  0.17523
   0  -5 -22  276.14    8.73   0  0.16886
   0  -5 -21   91.49    8.44   0  0.16083
   0  -5 -20  224.85    9.00   0  0.15232
   0  -5 -19   83.77    8.50   0  0.15249
   0  -5 -18  129.78    8.43   0  0.15323
   0  -5 -17   34.30    8.02   0  0.15424
   0  -5 -16 1165.00   10.29   0  0.15580
   0  -5 -15  302.88    6.25   0  0.15766
   0  -4 -10 1424.99    9.84   0  0.16901
   0  -4  -9  543.51    6.32   0  0.17695
   0  -3  -6  592.30    7.82   0  0.18408
   0   1   1  316.45    9.42   0  0.21878
   0   3   2 1206.70    9.02   0  0.22247
   0   4   2  130.02    4.11   0  0.22148
   0   5   2 3338.28   11.72   0  0.21956
   0   7   1   40.00    5.74   0  0.20674
   0   8   0  538.80    7.18   0  0.20041
   0   9  -2  199.71    6.98   0  0.19532
   0  10  -4  143.81    7.63   0  0.18833
   1  -4 -15   99.46    7.99   0  0.14966
   1  -4 -14   41.81    7.51   0  0.15327
   1  -4 -13  121.51    7.41   0  0.15977
   1  -3  -9   92.68    6.82   0  0.17141
   1  -2  -6 2304.86   12.98   0  0.18020
   1   5   0 1323.88    8.95   0  0.20562
   1   7  -1  127.80    6.17   0  0.19173
   1   9  -4 1119.91    9.70   0  0.18066
   1  10  -6  439.07    9.24   0  0.17323
   2  -3 -13   93.54    7.46   0  0.15112
   2  -3 -12  387.96    6.37   0  0.15621
   2  -2  -9  191.85    7.20   0  0.16311
   2   3  -2  223.29    7.10   0  0.19046
   2   4  -2   57.95    5.73   0  0.19080
   2   5  -2 2330.45   12.25   0  0.18520
   2   8  -5   76.90    7.14   0  0.17181
   2   9  -7    4.28    7.68   0  0.16726
   3  -3 -22 1121.54    9.61   0  0.14636
   3  -3 -21   22.15    6.52   0  0.14024
   3  -3 -20   29.69    6.20   0  0.14001
   3  -2 -14  807.85   11.00   0  0.13841
   3  -2 -13   68.44    7.83   0  0.14577
   3  -1 -10  573.53    9.36   0  0.15102
   3   8  -8   48.67    8.30   0  0.15302
   3   9 -10  297.39   12.25   0  0.14628
   4  -1 -26  228.10    8.67   0  0.18787
   4  -1 -16 1760.71   13.94   0  0.12725
   4  -1 -15  139.57    9.09   0  0.12842
   4   0 -12 2470.95   16.69   0  0.13272
   4   1 -10 2130.67   19.89   0  0.13894
   4   7 -10  671.18   13.12   0  0.13806
   4   8 -12  129.17   12.46   0  0.13485
   5   0 -25   38.06    8.31   0  0.17089
   5   0 -24   52.52    8.82   0  0.15943
   5   0 -23   35.13    9.02   0  0.14317
   5   0 -22   81.13   10.04   0  0.13020
   5   0 -21  129.25   10.21   0  0.12553
   5   0 -20  160.23   10.22   0  0.12298
   5   0 -19    2.26    9.78   0  0.12009
   5   1 -26   28.60    9.41   0  0.19364
   5   1 -16   47.42   12.27   0  0.11289
   5   2 -14 1282.08   21.14   0  0.10965
   5   3 -13  152.48   19.73   0  0.11042
   5   5 -12  349.31   19.35   0  0.11730
   5   6 -13   55.97   15.89   0  0.11959
   5   7 -15   22.50   14.57   0  0.12685
 -13   3  12  452.65    6.49   0  0.27997
 -13   4  12  246.60    6.07   0  0.27943
 -12   3  12  841.54    7.20   0  0.27904
 -11  -6  -1   15.57    8.06   0  0.22280
 -11   1  11   59.54    5.04   0  0.27646
 -10  -7  -5  106.92    7.37   0  0.21225
 -10  -6  -1    8.62    6.13   0  0.22388
 -10  -5   2   53.53    7.22   0  0.23134
 -10   0  10  154.80    6.33   0  0.27263
 -10   2  11   11.04    4.67   0  0.27794
 -10   4  11   18.80    3.43   0  0.27931
  -9  -7  -6   84.41    7.14   0  0.20276
  -9   3  11   43.00    4.70   0  0.27458
  -9   4  11  128.60    5.12   0  0.27406
  -9   6  10   61.86    3.55   0  0.27340
  -8  -7  -7  144.15    7.23   0  0.19867
  -8  -7  -6   91.40    6.87   0  0.20840
  -8  -6  -2 1009.58    8.74   0  0.22402
  -8  -5   1   26.66    5.50   0  0.23235
  -8   2  10  447.25    5.71   0  0.27515
  -7  -7  -8  712.79    8.87   0  0.19409
  -7  -7  -7    8.81    6.60   0  0.20362
  -7  -6  -3    5.43    5.86   0  0.21433
  -7  -5   0   25.76    6.74   0  0.22565
  -7   1   9  911.86    7.47   0  0.27092
  -7   3  10   89.33    4.67   0  0.26847
  -7   4  10 1869.43    8.19   0  0.26789
  -7   7   8  335.94    4.36   0  0.26321
  -7   9   6   88.67    4.32   0  0.25081
  -6  -7  -9   46.64    6.80   0  0.19466
  -6  -6  -4  213.64    6.27   0  0.21485
  -6  -5  -1   83.06    6.82   0  0.22301
  -6   2   9  434.44    5.86   0  0.26414
  -6   3   9  120.54    4.83   0  0.26566
  -6   4   9  392.91    5.47   0  0.26731
  -6   5   9  175.46    5.01   0  0.26276
  -6   6   8 1866.20    7.12   0  0.26321
  -6   9   5   65.84    4.24   0  0.24551
  -5  -7 -12  475.95    8.39   0  0.17782
  -5  -7 -11    6.58    7.12   0  0.18097
  -5  -7 -10  206.12    5.47   0  0.19092
  -5  -6  -5    1.51    4.13   0  0.20969
  -5  -5  -2 1320.77    9.07   0  0.21614
  -5   2   8   53.82    4.61   0  0.26079
  -5   3   8 5461.37   12.80   0  0.26410
  -5   4   8   93.77    3.45   0  0.26324
  -5   5   8 1017.20    6.63   0  0.25954
  -5   9   5   31.03    5.92   0  0.23843
  -4  -7 -15   54.12    8.33   0  0.16734
  -4  -7 -14  219.28    8.43   0  0.17491
  -4  -7 -13   76.83    5.52   0  0.17918
  -4  -6  -7   10.93    5.96   0  0.20075
  -4  -5  -3  798.49    7.57   0  0.21686
  -4   2   7  117.44    4.74   0  0.25499
  -4   3   7  243.83    4.09   0  0.25870
  -4   4   7  179.02    3.82   0  0.25796
  -4   5   7  365.75    5.50   0  0.25481
  -4   9   3   13.15    4.02   0  0.23253
  -4  10   2   49.08    6.46   0  0.22467
  -3  -7 -18    2.02    6.07   0  0.16567
  -3  -7 -17   94.42    6.11   0  0.16656
  -3  -6  -9   37.81    6.23   0  0.19113
  -3  -5  -5  229.09    6.39   0  0.20122
  -3  -4  -2 1981.36   10.64   0  0.21304
  -3   3   6   84.50    4.84   0  0.25251
  -3   4   6 4355.03   11.90   0  0.25166
  -3   5   6    8.25    4.71   0  0.24647
  -3   6   5   64.56    3.65   0  0.24559
  -3   9   2  100.02    6.06   0  0.22551
  -3  10   0  125.30    5.02   0  0.21750
  -3  10   1   13.12    6.35   0  0.21823
  -2  -6 -13  130.78    7.28   0  0.16906
  -2  -6 -12   58.96    6.77   0  0.17791
  -2  -5  -7  585.21    7.18   0  0.19442
  -2   1   4  383.86    7.27   0  0.24068
  -2   4   5  709.00    6.62   0  0.23996
  -2   6   4 3903.64   11.22   0  0.23803
  -2   7   3  109.05    3.89   0  0.23188
  -2   8   2   15.14    5.48   0  0.22403
  -2   9   1    5.09    5.94   0  0.21498
  -2  10  -1  120.00    6.83   0  0.20910
  -1  -6 -21   -8.32    8.80   0  0.16304
  -1  -6 -20    3.43    8.84   0  0.15691
  -1  -6 -19   -2.34    8.58   0  0.15875
  -1  -6 -18  662.43    9.76   0  0.16060
  -1  -6 -17   -3.42    8.11   0  0.15988
  -1  -6 -16  210.17    6.12   0  0.16286
  -1  -5 -10  706.70    8.24   0  0.17575
  -1  -5  -9   63.82    5.10   0  0.18502
  -1  -4  -6 1345.45    9.20   0  0.19255
  -1  -3  -3  446.06    7.19   0  0.20502
  -1  -2  -1  745.10    9.61   0  0.21229
  -1   2   3  508.12    6.38   0  0.23580
  -1   5   3   89.02    4.96   0  0.23196
  -1   7   2   17.56    5.43   0  0.21942
  -1   8   1  273.33    6.21   0  0.21182
  -1   9  -1   30.63    6.15   0  0.20773
  -1  10  -3   13.56    6.89   0  0.19874
   0  -5 -14   30.13    7.41   0  0.15951
   0  -5 -13   11.65    6.91   0  0.16786
   0  -4  -8  106.30    4.65   0  0.18508
   0  -3  -5   14.08    4.00   0  0.19877
   0  -2  -3  205.25    7.11   0  0.20061
   0   6   1   96.79    5.55   0  0.21391
   0   7   0    6.37    5.44   0  0.20788
   0   8  -1   14.13    5.92   0  0.20115
   0   9  -3   20.07    6.61   0  0.19442
   0  10  -5  180.31    7.80   0  0.18841
   1  -5 -23    3.29    5.99   0  0.16919
   1  -5 -22   65.44    6.33   0  0.16031
   1  -5 -21   83.87    6.44   0  0.15397
   1  -5 -20  418.40    7.17   0  0.15411
   1  -5 -19    3.03    5.68   0  0.15433
   1  -4 -12 2155.14   11.65   0  0.16180
   1  -4 -11   80.37    5.13   0  0.17000
   1  -3  -8 2574.67   12.51   0  0.17485
   1   1  -1  957.88   18.06   0  0.20307
   1   3   0 3827.45   16.18   0  0.20722
   1   4   0   59.06    5.14   0  0.20619
   1   6  -1   91.15    5.67   0  0.20090
   1   7  -2   37.35    5.90   0  0.19207
   1   8  -3  297.07    7.38   0  0.18640
   1   9  -5   41.50    7.32   0  0.18163
   1  10  -8  213.80    8.76   0  0.17409
   1  10  -7    9.65    8.10   0  0.17329
   2  -4 -24  433.27    9.24   0  0.17186
   2  -4 -23   41.15    8.35   0  0.16358
   2  -4 -22   81.35    8.63   0  0.15565
   2  -4 -21  239.41    9.28   0  0.14620
   2  -4 -20  368.38    9.55   0  0.14605
   2  -4 -19  112.35    8.61   0  0.14669
   2  -4 -18  254.23    8.68   0  0.14789
   2  -4 -17  393.27    8.77   0  0.14917
   2  -3 -11   67.10    4.93   0  0.16326
   2  -2  -8 1071.87    9.63   0  0.17606
   2  -1  -6 3034.46   16.28   0  0.18117
   2   6  -3   86.11    6.32   0  0.18022
   2   7  -4   67.88    6.52   0  0.17612
   2   8  -6   19.81    6.96   0  0.17270
   2   9  -8   12.44    7.87   0  0.16741
   3  -3 -25    4.69    8.24   0  0.17300
   3  -3 -24  165.69    8.67   0  0.16604
   3  -3 -23   24.70    8.46   0  0.15588
   3  -3 -19   71.99    8.78   0  0.13942
   3  -3 -18 1677.52   12.20   0  0.14053
   3  -3 -17   -0.10    8.21   0  0.14195
   3  -2 -12 1714.23   11.91   0  0.15006
   3  -1  -9  159.59    7.12   0  0.16505
   3   5  -5  155.79    7.21   0  0.16416
   3   6  -6  535.03    8.90   0  0.16429
   3   7  -7  110.58    7.87   0  0.15546
   3   8  -9   84.91    8.43   0  0.15507
   3   9 -12  319.61   10.79   0  0.14806
   3   9 -11    6.90   11.46   0  0.14576
   4  -2 -26   46.30    6.13   0  0.17900
   4  -2 -25   35.12    8.68   0  0.16601
   4  -2 -24  274.86    9.35   0  0.15507
   4  -2 -23   92.31    9.45   0  0.14515
   4  -2 -22  581.44   11.14   0  0.13377
   4  -2 -21  108.05    9.58   0  0.13286
   4  -2 -20   49.43    9.25   0  0.13276
   4  -2 -19    9.36    8.98   0  0.13316
   4  -2 -18  918.49    9.41   0  0.13347
   4  -1 -14 1108.60   11.95   0  0.13079
   4   0 -11    7.15    7.05   0  0.14400
   4   5  -8  132.05   11.39   0  0.14360
   4   6  -9   59.63    9.91   0  0.13979
   4   7 -11    8.16    8.59   0  0.14185
   4   8 -13    9.25   11.97   0  0.13525
   5   0 -26  215.04    8.62   0  0.18718
   5   0 -18   14.71    9.86   0  0.11740
   5   0 -17  265.71   10.76   0  0.11761
   5   1 -15  213.62   12.89   0  0.11108
   5   7 -16   26.86   14.34   0  0.13048
   6   5 -20    0.19    6.49   0  0.13767
 -14   1  11  146.45    7.12   0  0.28249
 -14   2  11    5.47    5.28   0  0.28675
 -13   1  11   77.70    6.60   0  0.28095
 -13   2  11  148.07    5.52   0  0.28769
 -13   4  11  147.45    4.25   0  0.28639
 -12  -6   0   28.44    6.46   0  0.23790
 -12   1  11  234.43    6.73   0  0.28182
 -12   2  11   19.11    4.87   0  0.28658
 -11   0  10   33.80    4.79   0  0.27994
 -11   2  11  196.23    5.41   0  0.28306
 -11   3  11    3.83    4.70   0  0.28509
 -11   4  11  161.31    5.32   0  0.28341
 -11   6  10   10.71    3.63   0  0.28026
 -10  -7  -4  292.84    7.55   0  0.22133
 -10  -1   9    4.46    6.80   0  0.27255
 -10   3  11   14.14    4.63   0  0.28083
  -9  -7  -5   45.55    6.70   0  0.21331
  -9  -6  -1   55.72    7.33   0  0.22946
  -9  -4   4  800.51   11.12   0  0.24947
  -9   1  10  838.92    7.27   0  0.27827
  -9   5  10  340.17    5.43   0  0.27957
  -8  -7  -5  147.60    6.71   0  0.21905
  -8  -1   8  629.25    9.31   0  0.27066
  -8   0   9    5.02    5.70   0  0.27107
  -8   3  10  454.21    5.68   0  0.27703
  -8   4  10  255.31    5.14   0  0.27560
  -8   7   8  119.09    3.77   0  0.26961
  -8   8   7    4.97    3.77   0  0.26380
  -7  -7  -6  262.14    6.78   0  0.21457
  -7  -6  -2  159.23    5.89   0  0.23071
  -7   2   9   25.58    3.10   0  0.27714
  -7   4   9   36.91    3.31   0  0.27578
  -7   5   9  160.77    4.91   0  0.27184
  -7   9   5    7.29    4.07   0  0.25212
  -6  -7  -8  527.24    7.96   0  0.20028
  -6  -7  -7   98.51    6.53   0  0.21022
  -6  -6  -3   17.48    5.44   0  0.22648
  -6  -4   2 1215.96   10.60   0  0.24102
  -6   1   8   42.22    4.39   0  0.27156
  -6   5   8   10.49    3.14   0  0.27000
  -5  -7  -9  124.19    6.73   0  0.20026
  -5  -4   1  400.56    7.82   0  0.23140
  -5   9   4 1181.87    7.77   0  0.24011
  -4  -7 -12  459.89    8.14   0  0.18314
  -4  -7 -11   46.98    6.73   0  0.19226
  -4  -6  -6 1761.26    9.58   0  0.20926
  -4  -4   0  238.88    5.79   0  0.23464
  -4   6   6   91.86    4.95   0  0.25339
  -4  10   1   40.36    6.39   0  0.22560
  -3  -7 -16  464.08    9.05   0  0.16889
  -3  -7 -15   40.73    7.68   0  0.17232
  -3  -7 -14  109.81    7.38   0  0.18038
  -3  -7 -13   62.34    5.11   0  0.18347
  -3  -6  -8  553.89    7.22   0  0.19711
  -3  -5  -4   35.19    5.28   0  0.21811
  -3   8   3  226.01    5.92   0  0.23372
  -3   9   1   10.10    4.15   0  0.22791
  -3  10  -1   32.80    4.65   0  0.21854
  -2  -7 -19   74.86    8.79   0  0.16771
  -2  -7 -18  287.45    6.79   0  0.16847
  -2  -6 -11   74.09    6.59   0  0.18225
  -2  -6 -10 1494.03    9.13   0  0.19157
  -2  -5  -6  719.39    7.23   0  0.20670
  -2  -4  -3  540.38    6.73   0  0.22008
  -2  -3  -1   28.77    5.07   0  0.22224
  -2   5   4  224.10    5.19   0  0.24557
  -2   9   0  136.68    6.09   0  0.21823
  -2  10  -2   94.48    6.67   0  0.20975
  -1  -6 -15    0.26    7.43   0  0.16912
  -1  -6 -14  441.44    8.13   0  0.17185
  -1  -6 -13   37.18    6.99   0  0.17765
  -1  -5  -8    3.97    5.88   0  0.19603
  -1  -4  -5  223.52    6.16   0  0.20102
  -1   3   3  288.16    5.66   0  0.24119
  -1   4   3  483.13    6.15   0  0.23739
  -1   6   2  203.93    5.32   0  0.23138
  -1   7   1  163.62    5.65   0  0.22352
  -1   8   0    3.11    5.57   0  0.21407
  -1   9  -2  158.63    6.38   0  0.20906
  -1  10  -4  170.49    7.28   0  0.20142
   0  -6 -21    8.43    8.66   0  0.16127
   0  -6 -20   69.63    8.54   0  0.16198
   0  -6 -19   38.12    8.34   0  0.16244
   0  -6 -18  833.41    8.01   0  0.16303
   0  -5 -12 1097.89    9.08   0  0.17208
   0  -5 -11  968.30    8.52   0  0.18121
   0  -4  -7   57.59    4.08   0  0.19704
   0   5   1  826.29    7.11   0  0.22486
   0   8  -2   38.37    5.90   0  0.20596
   0   9  -4   68.18    6.74   0  0.19747
   0  10  -6  162.55    7.93   0  0.18802
   1  -5 -18  481.26    8.89   0  0.15530
   1  -5 -17   28.59    7.79   0  0.15579
   1  -5 -16  158.12    7.83   0  0.15953
   1  -5 -15  -15.51    7.32   0  0.16138
   1  -4 -10  748.64    8.10   0  0.17993
   1  -3  -7  201.55    6.37   0  0.19473
   1  -2  -5  461.47    7.70   0  0.19725
   1   0  -2  730.26   17.22   0  0.20673
   1   5  -1  255.55    6.05   0  0.20962
   1   8  -4   82.49    6.65   0  0.18916
   1   9  -6  206.61    7.42   0  0.18314
   2  -4 -16   65.74    7.85   0  0.15047
   2  -4 -15   44.82    7.50   0  0.15348
   2  -4 -14  821.51    9.00   0  0.16068
   2  -3 -10   16.43    6.17   0  0.17397
   2   5  -3  607.00    7.73   0  0.19177
   2   6  -4 3026.10   13.33   0  0.18838
   2   7  -5   66.99    6.27   0  0.18208
   2   9  -9    9.33    8.15   0  0.16826
   3  -3 -16  457.59    9.79   0  0.14335
   3  -3 -15   -2.24    7.92   0  0.14746
   3  -3 -14 2922.62   12.40   0  0.15340
   3  -2 -11 1048.93    9.87   0  0.16027
   3   0  -7    8.88    6.19   0  0.17766
   3   1  -6  174.79   10.91   0  0.17527
   3   4  -5   36.98    7.59   0  0.17284
   3   7  -8  425.15    8.81   0  0.16246
   3   8 -10  327.60    9.51   0  0.15773
   3   9 -13   42.45    9.79   0  0.14910
   4  -2 -17  115.65    9.01   0  0.13453
   4  -2 -16   42.45    8.29   0  0.13659
   4  -1 -13   43.17    7.91   0  0.13932
   4   4  -8  522.28   13.48   0  0.15135
   4   8 -14  138.93   12.77   0  0.13853
   5  -1 -26   41.83    8.22   0  0.17725
   5  -1 -25  122.30    9.06   0  0.16442
   5  -1 -24  120.27    9.06   0  0.15132
   5  -1 -23    5.36    9.49   0  0.13832
   5  -1 -22  367.92   10.63   0  0.13099
   5  -1 -21  138.36   10.00   0  0.12778
   5  -1 -20   22.49    9.57   0  0.12523
   5   0 -16  178.22   10.15   0  0.11958
   5   1 -14  172.44   12.02   0  0.11891
   5   2 -13   37.80   12.38   0  0.12454
   5   4 -13   -0.13    5.76   0  0.13037
   5   6 -14   67.16   15.34   0  0.12613
   5   7 -17   26.19   15.71   0  0.13434
   6   2 -25   18.80    8.34   0  0.17457
   6   2 -24   23.79    8.74   0  0.15900
   6   2 -23   10.71    9.27   0  0.14594
   6   2 -22  213.80   10.40   0  0.13909
   6   2 -21   44.15    9.37   0  0.13453
   6   3 -24   71.33   10.80   0  0.16511
   6   3 -23   -2.59   12.62   0  0.14976
   6   3 -22   20.80   12.80   0  0.14125
   6   3 -21   -4.68   13.40   0  0.13552
   6   4 -23    0.02   12.65   0  0.15334
 -14   0  10  187.02    7.26   0  0.28459
 -13   0  10    9.06    6.19   0  0.28443
 -12  -5   3   61.61    7.41   0  0.25459
 -12   0  10  223.75    6.79   0  0.28433
 -11  -6   0  505.23    9.09   0  0.23924
 -10  -7  -3   81.54    6.67   0  0.23161
 -10  -6   0   52.89    7.22   0  0.23849
 -10   1  10 1205.98    8.17   0  0.28449
 -10   4  10  616.58    6.11   0  0.28587
 -10   7   8  246.32    4.36   0  0.27557
  -9  -7  -4  416.56    8.97   0  0.22312
  -9  -5   2  901.38    9.60   0  0.24602
  -9   2  10  901.74    6.76   0  0.28238
  -9   3  10   59.20    4.54   0  0.28264
  -9   4  10 1236.52    7.22   0  0.28082
  -8  -7  -4  624.98    7.85   0  0.22853
  -8  -6  -1   42.59    6.92   0  0.23423
  -8   1   9   29.94    4.47   0  0.28252
  -8   5   9  115.94    4.78   0  0.27758
  -8   6   8 1478.40    6.50   0  0.27553
  -8   8   6  398.97    4.79   0  0.26415
  -8   9   5   31.99    4.31   0  0.25622
  -7  -8 -10  134.15    7.57   0  0.20452
  -7  -7  -5   49.46    6.06   0  0.22184
  -7  -5   1  337.33    7.36   0  0.24271
  -7  -4   3  127.11    6.65   0  0.25013
  -7   0   8 1297.75    9.47   0  0.27543
  -7   3   9    6.49    4.41   0  0.27717
  -7   9   4  560.47    5.47   0  0.25161
  -6  -8 -12  271.35    8.16   0  0.19385
  -6  -8 -11   66.03    5.29   0  0.19991
  -6  -7  -6   16.47    5.90   0  0.21900
  -6  -5   0 1254.26    9.74   0  0.23700
  -6  -3   4 1512.94   14.60   0  0.25367
  -6   2   8 1201.59    7.49   0  0.27661
  -6   3   8  266.47    5.02   0  0.27598
  -6   4   8  976.67    6.52   0  0.27408
  -6   6   7   68.43    4.77   0  0.26812
  -6   9   4  316.17    6.37   0  0.24616
  -5  -8 -13   17.73    5.36   0  0.19146
  -5  -7  -8  282.56    7.01   0  0.20445
  -5  -7  -7    2.60    4.14   0  0.21405
  -5  -6  -4 1093.30    8.21   0  0.22064
  -5  -5  -1  146.79    6.67   0  0.23188
  -5  -3   3  285.43    8.76   0  0.23667
  -5   1   7  155.19    4.94   0  0.26882
  -5   4   7  326.81    4.13   0  0.27004
  -5   5   7   14.72    4.43   0  0.26643
  -5   7   5  195.94    4.02   0  0.25756
  -5   9   3  116.04    5.92   0  0.24047
  -5  10   1   12.32    6.42   0  0.23295
  -4  -8 -15   26.36    5.64   0  0.18373
  -4  -7 -10   61.43    6.45   0  0.19565
  -4  -7  -9  103.33    6.27   0  0.20482
  -4  -6  -5  105.90    5.67   0  0.22003
  -4  -5  -2 1056.54    7.93   0  0.23030
  -4  -3   2  173.24    6.63   0  0.24841
  -4   1   6 3873.00   14.31   0  0.26455
  -4   4   6   69.74    3.35   0  0.26479
  -4   5   6 2665.85    9.21   0  0.25912
  -4   6   5   39.87    3.46   0  0.25751
  -4   7   4  179.89    4.01   0  0.25141
  -4   8   3    4.40    5.24   0  0.24382
  -4   9   2  126.84    5.79   0  0.23376
  -4  10   0   66.57    6.45   0  0.22548
  -3  -7 -12  352.45    7.73   0  0.18667
  -3  -7 -11    7.72    4.72   0  0.19529
  -3  -6  -7   14.30    5.86   0  0.20472
  -3  -4  -1  319.60    6.09   0  0.23209
  -3   1   5  300.62    6.10   0  0.25587
  -3   4   5   46.79    3.26   0  0.25860
  -3   5   5  223.25    5.12   0  0.25312
  -3   6   4  102.43    4.86   0  0.25081
  -3   8   2 1056.96    7.26   0  0.23534
  -3   9   0 1034.67    6.63   0  0.22798
  -3  10  -2  313.51    7.08   0  0.21882
  -2  -7 -17   58.13    8.21   0  0.16899
  -2  -7 -16  370.15    8.69   0  0.17146
  -2  -7 -15  140.80    7.59   0  0.17951
  -2  -7 -14  104.85    5.26   0  0.18268
  -2  -6  -9   98.92    6.06   0  0.19808
  -2  -5  -5  312.42    5.98   0  0.21696
  -2  -2   1 1929.82   14.60   0  0.23743
  -2   2   4 1261.90    8.82   0  0.25314
  -2   3   4   62.48    4.66   0  0.25291
  -2   4   4  850.77    6.76   0  0.24836
  -2   6   3   77.37    5.06   0  0.23991
  -2   8   1   57.02    5.58   0  0.22551
  -2   9  -1    8.97    5.90   0  0.21761
  -2  10  -3   29.24    6.70   0  0.20881
  -1  -7 -19   30.93    6.08   0  0.16898
  -1  -6 -12  332.10    7.31   0  0.18090
  -1  -6 -11   -3.98    4.34   0  0.18989
  -1  -5  -7   73.92    4.04   0  0.20566
  -1   5   2    8.09    4.60   0  0.23729
  -1   8  -1  209.35    6.07   0  0.21808
  -1   9  -3   75.95    6.31   0  0.20828
  -1  10  -5   13.21    7.07   0  0.19997
   0  -6 -17    9.57    7.98   0  0.16330
   0  -6 -16    6.66    7.56   0  0.16645
   0  -6 -15   50.78    7.40   0  0.17259
   0  -5 -10  545.59    7.39   0  0.18648
   0  -3  -4  391.14    6.55   0  0.21509
   0  -1  -1  360.37    9.84   0  0.22058
   0   2   1  870.48    9.34   0  0.23454
   0   3   1   24.15    3.49   0  0.23356
   0   4   1  283.71    5.72   0  0.22810
   0   7  -1   35.21    5.59   0  0.21078
   0   8  -3   11.30    5.90   0  0.20542
   0   9  -5    4.08    6.56   0  0.19832
   0  10  -7   23.66    7.59   0  0.18762
   1  -5 -14  741.28    8.69   0  0.16629
   1  -5 -13   82.69    6.90   0  0.17454
   1  -4  -9  342.55    6.81   0  0.19026
   1  -1  -3  932.91   11.18   0  0.20899
   1   4  -1  162.96    5.50   0  0.21775
   1   6  -2  166.42    5.85   0  0.20247
   1   7  -3  161.69    6.23   0  0.19766
   1   8  -5  117.91    6.39   0  0.19253
   1   9  -7   -7.38    7.08   0  0.18447
   2  -5 -23  102.96    8.91   0  0.16117
   2  -5 -22  106.56    8.98   0  0.15580
   2  -5 -21   86.17    8.90   0  0.15622
   2  -5 -20  423.14    9.38   0  0.15664
   2  -5 -19  108.71    6.14   0  0.15695
   2  -5 -18    7.13    5.50   0  0.15746
   2  -4 -13  750.80    8.60   0  0.16513
   2  -3  -9  196.52    4.99   0  0.18375
   2  -2  -7  353.49    7.16   0  0.18733
   2   4  -3  177.41    6.09   0  0.20126
   2   8  -7   69.66    8.62   0  0.17434
   2   9 -10   15.40    8.05   0  0.16799
   3  -4 -24  415.53    9.61   0  0.16428
   3  -4 -23   75.90    8.98   0  0.15521
   3  -4 -22  159.46    9.36   0  0.14825
   3  -4 -21   19.17    8.57   0  0.14855
   3  -4 -20  868.95   10.41   0  0.14898
   3  -4 -19   86.33    8.42   0  0.14970
   3  -4 -18   -1.15    5.93   0  0.15044
   3  -3 -13   22.56    7.25   0  0.16125
   3  -2 -10 2484.64   12.63   0  0.17297
   3  -1  -8 1931.37   12.51   0  0.18184
   3   3  -5   18.44    8.43   0  0.17737
   3   5  -6    9.13    6.13   0  0.17396
   3   6  -7   20.48    6.67   0  0.16842
   3   8 -11  232.51    9.01   0  0.15910
   3   9 -14  376.88   11.53   0  0.14850
   4  -3 -25    0.16    8.78   0  0.16312
   4  -3 -24   69.37    9.32   0  0.15305
   4  -3 -23    7.41    9.31   0  0.14497
   4  -3 -22  175.92    9.54   0  0.14156
   4  -3 -21    3.40    9.01   0  0.14172
   4  -3 -20  402.89    9.94   0  0.14169
   4  -3 -19    5.80    6.13   0  0.14195
   4  -2 -15   24.67    8.02   0  0.13968
   4  -2 -14  546.21    7.34   0  0.14794
   4  -1 -12 1295.70   11.53   0  0.14929
   4   0 -10  613.37    9.66   0  0.16087
   4   1  -9   52.12    8.35   0  0.15784
   4   5  -9   60.35    9.23   0  0.15242
   4   6 -10  481.27   11.56   0  0.14654
   4   7 -12  522.16   12.77   0  0.14378
   4   8 -15    3.48   12.07   0  0.13970
   5  -1 -19  132.28   11.91   0  0.12492
   5  -1 -18  621.32   11.19   0  0.12567
   5  -1 -17  942.97   11.83   0  0.12713
   5   0 -15   54.63   10.74   0  0.12565
   5   5 -13  129.67   16.06   0  0.12803
   5   7 -18   -0.22   13.68   0  0.13934
   6   1 -25    5.11    8.49   0  0.16811
   6   1 -24  520.49   12.64   0  0.15289
   6   1 -23   45.16   11.36   0  0.14206
   6   1 -22   12.01    9.20   0  0.13753
   6   2 -20   20.15   11.24   0  0.13025
   6   3 -20  128.10   13.87   0  0.13293
   6   4 -22  103.17   15.38   0  0.14434
 -14  -1   9   19.81    6.44   0  0.28542
 -14   1  10   35.32    5.29   0  0.29189
 -13  -5   3   35.62    8.54   0  0.25784
 -13  -4   5   10.76    9.89   0  0.26328
 -13   1  10 1079.41    8.11   0  0.29240
 -13   4  10  141.45    5.44   0  0.29070
 -12  -6   1   25.61    7.31   0  0.25323
 -12  -4   5   59.19   10.09   0  0.25560
 -12  -1   9    6.34    5.81   0  0.28808
 -12   1  10  339.83    5.86   0  0.29137
 -12   4  10  573.61    6.17   0  0.28979
 -11  -6   1   -0.67    5.62   0  0.25779
 -11  -5   3   36.66    7.76   0  0.25853
 -11  -1   9  170.06    7.54   0  0.28178
 -11   1  10  929.47    8.17   0  0.28949
 -11   2  10  421.86    5.72   0  0.29228
 -11   3  10   85.57    4.77   0  0.29153
 -11   4  10 1006.70    6.93   0  0.28801
 -10  -5   3  129.67    7.02   0  0.26238
 -10   2  10  786.37    6.53   0  0.28865
 -10   3  10   88.49    4.61   0  0.28846
  -9  -7  -3   16.06    6.11   0  0.23300
  -9  -6   0 1114.59   10.15   0  0.24611
  -9   0   9   42.93    5.66   0  0.28414
  -9   4   9   63.68    3.41   0  0.28702
  -9   7   7  117.78    3.84   0  0.27510
  -8  -8  -7   96.22    6.86   0  0.22216
  -8  -7  -3   39.38    5.85   0  0.23796
  -8  -5   2  276.78    7.10   0  0.25508
  -8   2   9  341.56    5.29   0  0.28508
  -8   3   9   19.21    4.28   0  0.28462
  -8   4   9  213.36    4.96   0  0.28224
  -8   9   4  317.78    4.83   0  0.25625
  -7  -8  -9   19.72    6.95   0  0.20893
  -7  -8  -8  152.20    6.98   0  0.21788
  -7  -7  -4  198.79    6.13   0  0.23311
  -7  -6  -1    7.57    5.30   0  0.24014
  -7   4   8  125.31    3.53   0  0.28157
  -7   9   3   42.39    4.21   0  0.25139
  -6  -8 -10  124.79    7.09   0  0.20460
  -6  -8  -9   32.25    4.77   0  0.21338
  -6  -7  -5  213.24    6.16   0  0.22880
  -6  -6  -2 1005.20    7.87   0  0.23564
  -6   5   7  178.73    4.83   0  0.27451
  -6   9   3    9.65    5.68   0  0.24719
  -5  -8 -12  151.68    7.50   0  0.19556
  -5  -8 -11   41.32    6.88   0  0.20470
  -5  -7  -6  774.52    7.59   0  0.22387
  -5  -6  -3   20.01    5.29   0  0.23061
  -5   2   7 1163.73    7.47   0  0.27423
  -5   3   7  118.22    4.55   0  0.27444
  -5   5   6  238.17    3.85   0  0.27029
  -5   8   3  149.11    4.10   0  0.25084
  -5   9   2  176.41    5.94   0  0.24086
  -4  -8 -14   47.01    7.53   0  0.19010
  -4  -8 -13   51.52    5.17   0  0.19605
  -4  -7  -8 1010.31    8.19   0  0.20994
  -4  -6  -4  812.90    7.13   0  0.23093
  -4   2   6   26.59    4.16   0  0.26801
  -4   3   6  315.81    5.14   0  0.26824
  -4   8   2  167.66    4.07   0  0.24410
  -4   9   1   44.58    5.70   0  0.23506
  -4  10  -2  186.69    4.93   0  0.22616
  -4  10  -1  121.12    6.54   0  0.22566
  -3  -8 -16   52.87    5.75   0  0.18445
  -3  -7 -10  472.15    7.26   0  0.20042
  -3  -7  -9  176.68    4.90   0  0.20859
  -3  -6  -6  210.82    6.12   0  0.21545
  -3  -5  -3  497.84    6.65   0  0.22773
  -3  -3   1    6.17    5.87   0  0.24466
  -3   2   5  368.14    5.77   0  0.26244
  -3   3   5   23.62    4.55   0  0.26188
  -3   5   4 1313.78    6.50   0  0.25821
  -3   8   1  225.29    5.64   0  0.23725
  -3   9  -1   81.99    4.27   0  0.22870
  -3  10  -3    6.39    6.42   0  0.21865
  -2  -7 -13   95.93    6.82   0  0.18672
  -2  -7 -12  874.77    8.17   0  0.19539
  -2  -6  -8  706.50    7.23   0  0.20458
  -2  -6  -7  190.74    4.39   0  0.21459
  -2  -4  -2  458.99    6.24   0  0.23457
  -2   0   3    5.37    5.11   0  0.25218
  -2   5   3  713.02    6.33   0  0.24989
  -2   6   2   45.56    3.43   0  0.24446
  -2   8   0  413.52    6.36   0  0.22718
  -2   9  -2   85.26    5.96   0  0.22005
  -2  10  -5  142.44    5.19   0  0.21065
  -2  10  -4   48.38    6.72   0  0.21024
  -1  -7 -18   54.46    8.26   0  0.17018
  -1  -7 -17   81.74    8.19   0  0.17161
  -1  -7 -16  334.58    8.21   0  0.17915
  -1  -7 -15   12.18    5.11   0  0.18233
  -1  -6 -10   85.43    6.01   0  0.19736
  -1  -5  -6  808.83    6.18   0  0.21628
  -1  -4  -4  510.13    6.62   0  0.21918
  -1  -3  -2  904.01    8.17   0  0.22686
  -1   4   2 3528.70   11.75   0  0.24542
  -1   7   0  294.52    5.93   0  0.22458
  -1   8  -2  920.23    7.59   0  0.21940
  -1   9  -4  922.07    8.13   0  0.21048
  -1  10  -6  213.36    7.63   0  0.19999
   0  -7 -20  271.50    6.89   0  0.16983
   0  -6 -14 1463.95    9.74   0  0.17670
   0  -6 -13    1.19    6.56   0  0.18516
   0  -6 -12  153.89    4.96   0  0.18876
   0  -5  -9   12.21    5.82   0  0.19425
   0  -4  -6 1290.86    8.50   0  0.20756
   0  -2  -2   12.95    5.61   0  0.22776
   0   5   0    1.14    4.74   0  0.22627
   0   7  -2 1700.03    9.02   0  0.21494
   0   8  -4  369.49    5.38   0  0.20665
   0   9  -6   41.29    6.55   0  0.19958
   0  10  -8   41.28    9.33   0  0.18838
   1  -6 -21    5.45    8.38   0  0.16299
   1  -6 -20   27.87    8.31   0  0.16266
   1  -6 -19   -0.93    7.94   0  0.16437
   1  -6 -18  288.06    8.39   0  0.16616
   1  -6 -17    3.66    5.30   0  0.16806
   1  -5 -12    5.72    6.41   0  0.17998
   1  -5 -11   99.49    4.65   0  0.18831
   1  -4  -8  786.30    7.70   0  0.20059
   1  -3  -6 1081.70    8.52   0  0.20366
   1  -2  -4  370.32    7.06   0  0.21696
   1   2  -1 1856.53   14.09   0  0.22678
   1   3  -1    4.65    4.92   0  0.22490
   1   5  -2    8.03    3.56   0  0.21548
   1   6  -3    3.06    3.62   0  0.20882
   1   7  -4  318.07    6.68   0  0.20137
   1   8  -6  637.13    8.01   0  0.19443
   1   9  -8  562.97    8.62   0  0.18427
   2  -5 -17   69.84    7.69   0  0.15841
   2  -5 -16 1234.94    9.80   0  0.16477
   2  -5 -15  430.75    6.30   0  0.16864
   2  -4 -12   40.37    6.53   0  0.17317
   2  -4 -11  116.90    6.42   0  0.18158
   2  -1  -5  254.23    7.06   0  0.20390
   2   0  -4 6709.39   31.87   0  0.20613
   2   3  -3   81.81    5.73   0  0.20921
   2   5  -4  195.19    6.00   0  0.19879
   2   6  -5  195.22    6.45   0  0.19337
   2   7  -6 1253.38   10.75   0  0.18303
   2   8  -8  115.22    8.72   0  0.17732
   2   9 -11   31.91    8.21   0  0.16783
   3  -4 -17   21.40    7.89   0  0.15154
   3  -4 -16 1540.50   10.90   0  0.15599
   3  -4 -15  138.35    5.53   0  0.16150
   3  -3 -12 2413.19   12.37   0  0.16790
   3  -2  -9  372.23    5.82   0  0.18484
   3   7  -9  488.19   10.34   0  0.16543
   3   8 -12  376.82    9.51   0  0.16095
   4  -3 -18  104.05    8.62   0  0.14280
   4  -3 -17   19.42    8.08   0  0.14384
   4  -3 -16  170.51    6.30   0  0.14824
   4  -2 -13  447.64    8.25   0  0.15758
   4  -1 -11  142.13    6.90   0  0.16435
   4   3  -8  200.47   15.82   0  0.15380
   4   7 -13    3.07   10.55   0  0.14394
   4   8 -16   19.47   11.97   0  0.14287
   5  -2 -25   47.54    9.09   0  0.15695
   5  -2 -24  447.20   10.77   0  0.14486
   5  -2 -23   60.16    9.84   0  0.13523
   5  -2 -22   17.77    9.39   0  0.13310
   5  -2 -21   85.22    9.55   0  0.13331
   5  -2 -20 1113.54   12.06   0  0.13346
   5  -2 -19  217.29    9.40   0  0.13394
   5  -1 -16   45.56    8.49   0  0.13172
   5   0 -14   75.90    8.27   0  0.13443
   5   1 -13  653.97   13.26   0  0.13467
   5   6 -15   37.86   14.83   0  0.13329
   5   7 -19    0.74   15.60   0  0.14230
   6   0 -26  631.13   10.58   0  0.17428
   6   0 -25    4.11    8.78   0  0.16039
   6   0 -24   28.86    9.29   0  0.14477
   6   0 -23    3.27    9.37   0  0.13957
   6   0 -22 1086.22   13.06   0  0.13520
   6   1 -21   28.08   11.50   0  0.13341
   6   1 -20  775.03   14.43   0  0.12823
   6   1 -19   64.67    9.67   0  0.12458
   6   2 -19   80.61   13.29   0  0.12724
   6   2 -18  294.46   13.00   0  0.12311
   6   3 -19    1.89   12.87   0  0.12977
   6   4 -21   37.83   16.39   0  0.14007
 -14  -2   8  103.05   10.22   0  0.28169
 -13  -2   8  640.71   12.47   0  0.28453
 -13  -1   9  124.97    7.65   0  0.28692
 -13   2  10  211.26    6.59   0  0.29366
 -12  -2   8   50.14    8.16   0  0.28323
 -12   2  10  853.24    7.79   0  0.29317
 -11  -4   5   49.38    9.30   0  0.26577
 -11  -2   8  838.22   14.71   0  0.27571
 -11   4   9   31.38    3.51   0  0.29224
 -10  -7  -2   38.61    7.40   0  0.24219
 -10  -6   1   30.47    6.79   0  0.25657
 -10   0   9    1.56    5.28   0  0.29161
 -10   4   9  200.71    5.10   0  0.29010
  -9  -7  -2  481.01    7.35   0  0.24294
  -9   1   9  653.04    6.49   0  0.29002
  -9   2   9  110.62    4.57   0  0.29198
  -9   3   9    3.88    4.33   0  0.28990
  -9   7   6  596.53    4.98   0  0.27555
  -8  -8  -6  162.80    6.85   0  0.23008
  -8  -6   0  449.32    7.88   0  0.25142
  -8  -4   4   82.62    7.16   0  0.26463
  -8   4   8  717.20    5.03   0  0.28670
  -8   6   7   71.60    4.83   0  0.27835
  -7  -8  -7   80.98    6.67   0  0.22457
  -7  -7  -3    6.90    5.32   0  0.24165
  -7   1   8  685.51    6.55   0  0.28480
  -7   2   8  137.52    4.58   0  0.28686
  -7   3   8 3148.52    9.91   0  0.28398
  -7   7   5  208.96    4.01   0  0.26933
  -7   9   2  229.69    4.70   0  0.25087
  -6  -8  -8  265.35    7.13   0  0.22134
  -6  -7  -4 1077.88    8.09   0  0.23720
  -6  -6  -1  144.12    5.41   0  0.24887
  -6  -5   1  103.60    5.16   0  0.25560
  -6   0   7    5.25    5.12   0  0.27872
  -6   4   7  310.95    4.95   0  0.27942
  -6   8   3    3.73    3.77   0  0.25626
  -6   9   2   14.82    5.60   0  0.24593
  -5  -8 -10   83.99    6.84   0  0.20775
  -5  -8  -9    3.80    4.45   0  0.21656
  -5  -7  -5   89.73    5.71   0  0.23236
  -5  -6  -2   25.51    4.94   0  0.24342
  -5  -5   0  181.81    5.44   0  0.24730
  -5  -4   2 3621.33   14.77   0  0.25972
  -5   4   6 3400.27    9.51   0  0.27564
  -5   6   5    6.98    4.57   0  0.26548
  -5   8   2  916.09    5.84   0  0.25035
  -5   9   1   -4.92    5.68   0  0.24072
  -4  -8 -12  252.70    7.43   0  0.19888
  -4  -8 -11   31.19    6.48   0  0.20771
  -4  -7  -7   49.92    5.71   0  0.21775
  -4  -5  -1  201.80    5.49   0  0.24172
  -4  -4   1  822.34    7.63   0  0.25481
  -4   5   5  491.16    5.62   0  0.26413
  -4   6   4 2244.58    8.49   0  0.25988
  -4   8   1   42.25    3.68   0  0.24385
  -4   9   0  298.84    6.34   0  0.23515
  -4  10  -3    4.65    4.46   0  0.22594
  -3  -8 -15   86.35    7.81   0  0.18699
  -3  -8 -14   42.57    7.57   0  0.19243
  -3  -8 -13   10.84    4.90   0  0.19851
  -3  -7  -8   40.89    5.68   0  0.21676
  -3  -6  -5   16.15    5.32   0  0.22417
  -3  -5  -2  638.81    5.74   0  0.24054
  -3   4   4    8.87    3.08   0  0.26397
  -3   6   3   10.69    4.56   0  0.25261
  -3   8   0  248.26    4.47   0  0.23749
  -3   9  -2  351.64    5.09   0  0.22810
  -3  10  -4  340.81    7.26   0  0.21955
  -2  -8 -16  350.91    6.41   0  0.18616
  -2  -7 -11  171.36    6.53   0  0.19843
  -2  -7 -10   48.21    4.29   0  0.20688
  -2  -5  -4 1242.51    8.08   0  0.22643
  -2  -3   0  990.61    8.68   0  0.24354
  -2   4   3  205.87    4.99   0  0.25670
  -2   8  -1    3.95    5.36   0  0.22789
  -2   9  -3    7.95    6.00   0  0.22017
  -2  10  -6  152.96    7.05   0  0.21041
  -1  -7 -14  310.12    7.51   0  0.18498
  -1  -7 -13  113.14    6.82   0  0.19324
  -1  -6  -9    2.83    5.68   0  0.20254
  -1  -4  -3   35.66    3.52   0  0.23254
  -1   1   2   16.76    5.61   0  0.24961
  -1   2   2 3426.24   13.96   0  0.25267
  -1   3   2   17.32    4.54   0  0.25091
  -1   5   1  159.48    5.05   0  0.24276
  -1   7  -1  506.50    6.38   0  0.22711
  -1   8  -3  291.26    4.78   0  0.21937
  -1   9  -5   61.78    6.31   0  0.21086
  -1  10  -8  275.22    7.99   0  0.19978
  -1  10  -7   -2.72    7.08   0  0.20119
   0  -7 -19   76.51    8.51   0  0.17041
   0  -7 -18  183.03    8.41   0  0.17252
   0  -7 -17   31.00    7.66   0  0.17690
   0  -7 -16  902.34    7.52   0  0.17980
   0  -6 -11   26.09    6.01   0  0.19666
   0  -5  -8 1198.96    8.26   0  0.20362
   0  -4  -5  335.03    5.97   0  0.22171
   0   4   0 1525.18    8.26   0  0.23702
   0   7  -3   72.36    5.45   0  0.21667
   0   9  -7   37.05    6.59   0  0.19973
   1  -6 -16  335.63    7.97   0  0.17086
   1  -6 -15    7.36    7.09   0  0.17696
   1  -6 -14   81.88    4.90   0  0.18184
   1  -5 -10  877.95    6.65   0  0.19593
   1  -4  -7  171.46    4.42   0  0.20951
   1   7  -5  273.46    6.45   0  0.20291
   1   8  -7  317.48    7.18   0  0.19526
   1   9  -9   60.87    7.26   0  0.18404
   2  -6 -22  284.34    9.59   0  0.16387
   2  -6 -21   13.99    6.00   0  0.16410
   2  -6 -20   15.40    5.79   0  0.16442
   2  -5 -14  153.00    6.89   0  0.17375
   2  -5 -13  119.29    4.94   0  0.17904
   2  -4 -10  350.84    6.76   0  0.19138
   2  -3  -8   95.65    5.84   0  0.19509
   2  -2  -6  143.15    5.97   0  0.20539
   2   2  -3  378.38   10.72   0  0.21242
   2   7  -7   46.74    6.19   0  0.18609
   2   8  -9   19.64    6.94   0  0.17774
   2   9 -13   28.16    8.38   0  0.16859
   2   9 -12   94.62    8.73   0  0.16796
   3  -5 -23   -2.55    9.10   0  0.15682
   3  -5 -22  176.53    9.08   0  0.15635
   3  -5 -21   25.78    8.48   0  0.15673
   3  -5 -20  242.46    8.80   0  0.15757
   3  -5 -19    7.22    5.81   0  0.15812
   3  -4 -14  428.53    7.88   0  0.16708
   3  -3 -11   -7.92    6.18   0  0.17821
   3   4  -6 3281.91   18.02   0  0.18543
   3   6  -8  158.79    7.28   0  0.17185
   3   7 -10  130.51    7.74   0  0.16887
   3   8 -13    1.37    8.18   0  0.16190
   4  -4 -24  107.74    9.53   0  0.15387
   4  -4 -23   19.60    9.16   0  0.14922
   4  -4 -22  196.92    9.42   0  0.14924
   4  -4 -21  186.01    9.14   0  0.14931
   4  -4 -20   29.28    8.37   0  0.14982
   4  -4 -19   46.55    5.89   0  0.15016
   4  -3 -15   27.58    7.37   0  0.15421
   4  -2 -12  532.75    8.21   0  0.16753
   4   6 -11   10.45   10.71   0  0.15273
   4   7 -14  414.74   10.92   0  0.14808
   4   8 -17    0.18   13.60   0  0.14416
   5  -3 -25    1.01    6.84   0  0.15091
   5  -3 -24   12.31    6.97   0  0.14141
   5  -3 -23   26.76    6.93   0  0.14082
   5  -2 -18  120.92    9.07   0  0.13443
   5  -2 -17  112.92    8.71   0  0.13695
   5  -1 -15  202.56    8.66   0  0.13888
   5   0 -13  258.59    8.35   0  0.15014
   6  -1 -25    9.60    9.10   0  0.15522
   6  -1 -24  490.76   11.25   0  0.14314
   6   0 -21    0.85   11.43   0  0.13139
   6   0 -20  292.09   10.65   0  0.12716
   6   0 -19   45.47    9.54   0  0.12625
   6   1 -18  347.07   12.87   0  0.12139
   6   3 -18   13.35   14.52   0  0.12742
   6   4 -20    5.43   17.27   0  0.13574
[truncated: 689,859 more chars]
